# Supplementary material for: GRP78 Overexpression Triggers PINK1-IP3R-Mediated Neuroprotective Mitophagy
Source: MDPI journal article supplement (doi:10.3390/biomedicines9081039), 2021-08-18
Supplement: s1 [file s1]

## **GRP78 Overexpression Triggers PINK1/IP<sub>3</sub>R-Mediated Neuroprotective Mitophagy**

Tatiana Leiva-Rodríguez<sup>1,2\*</sup>, David Romeo-Guitart<sup>1,2,8 \*,#</sup>, Pau Muñoz-Guardiola<sup>3</sup>, Miriam Polo<sup>4</sup>, Celia Bañuls<sup>4</sup>, Mireia Herrando-Grabulosa<sup>1,2</sup>, Valerie Petegnief<sup>5</sup>, Assumpció Bosch<sup>2,3</sup>, Jose Miguel Lizcano<sup>3</sup>, Nadezda Apostolova<sup>6</sup>, Joaquim Forés<sup>7</sup>, Caty Casas<sup>1,2,9 \*</sup>

### **Affiliations**

<sup>1</sup> Institut de Neurociències (INc) and Department of Cell Biology, Physiology and Immunology, Universitat Autònoma de Barcelona (UAB)

<sup>2</sup> Centro de Investigación Biomédica en Red sobre Enfermedades Neurodegenerativas (CIBERNED), Bellaterra, Barcelona, Spain

<sup>3</sup> INc and Department of Biochemistry and Molecular Biology, UAB, Bellaterra, Barcelona, Spain

<sup>4</sup> Service of Endocrinology. University Hospital Dr. Peset, Foundation for the Promotion of Health and Biomedical Research in the Valencian Region (FISABIO), Valencia, Spain

<sup>5</sup> Department of Brain Ischemia and Neurodegeneration, Institute for Biomedical Research of Barcelona (IIBB), Spanish Research Council (CSIC), Institut d'Investigacions Biomèdiques August Pi Sunyer (IDIBAPS), Barcelona, Spain

<sup>6</sup> Department de Farmacologia, Facultat de Medicina, Universitat de Valencia; CIBERehd, Valencia, Spain

<sup>7</sup> Hand and Peripheral Nerve Unit, Hospital Clínic i Provincial, Universitat de Barcelona, Barcelona, Spain Biotech, S.L, Barcelona, Spain

<sup>8</sup> Present address: Institut Necker Enfants-Malades (INEM), INSERM U1151, Laboratory "Hormonal regulation of brain development and functions"—Team 8, Université Paris Descartes, Sorbonne Paris Cité, 75015 Paris, France.

<sup>9</sup> Died June 29, 2020.

\* These authors contributed equally.

# Correspondence should be addressed to:

David Romeo-Guitart, david.romeo-guitart@inserm.fr; Tel: +33-01 40 61 53 57

Caty Casas Louzao, [Caty.Casas@uab.es](mailto:Caty.Casas@uab.es), Tel: +34-935811324

**Running title:** GRP78 triggers mitophagy

## **SUPPLEMENTARY INFORMATION**

- **[Supplementary Figures and Legends](#)**
- **[Supplementary Tables and Headings](#)**

## SUPPLEMENTARY FIGURES AND LEGENDS

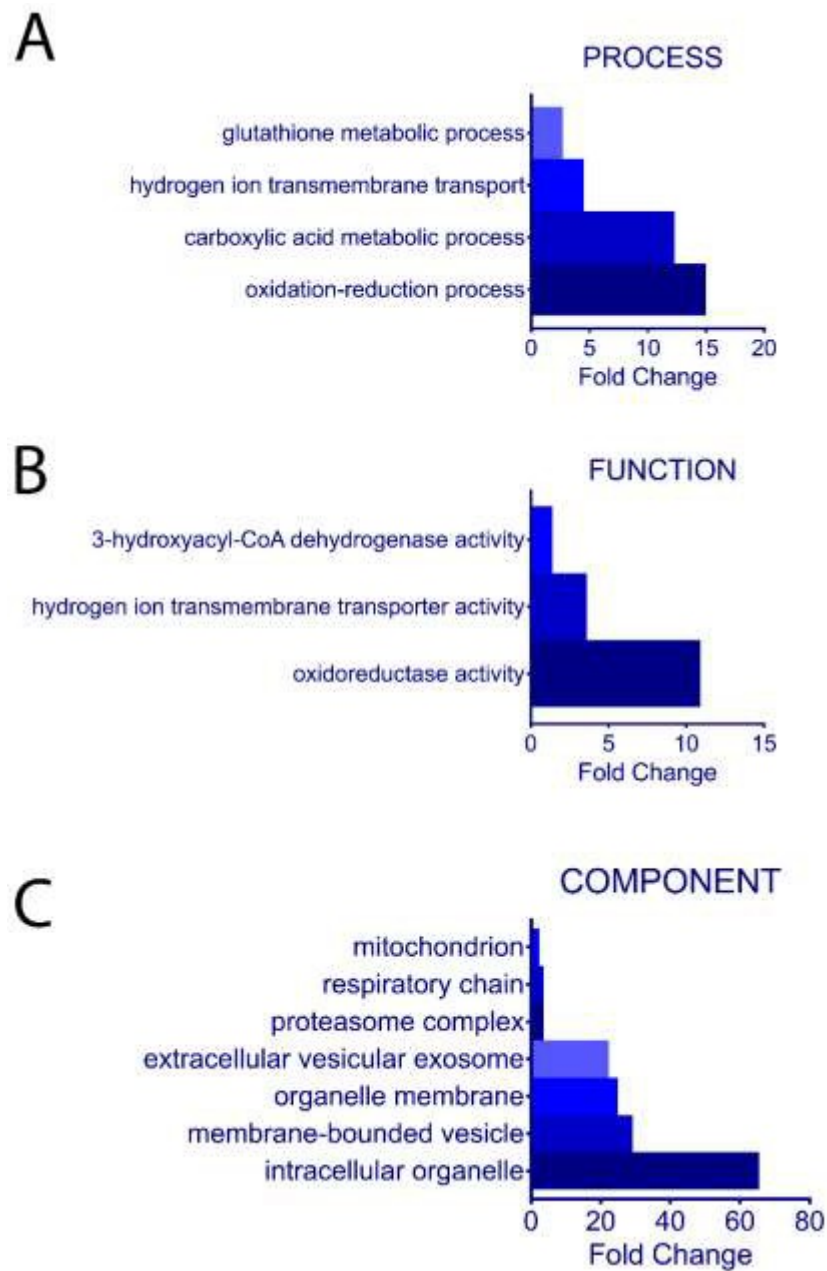

**Supplemental Figure 1. Bioinformatic analysis.** DAVID bioinformatic analysis of comparative proteomic data from signature proteins specifically modulated by GRP78 overexpression in L4-L5 spinal cord segments from RA-injured model revealed enrichment in mitochondrial processes (**A**), function (**B**), and components (**C**) at 7dpi.

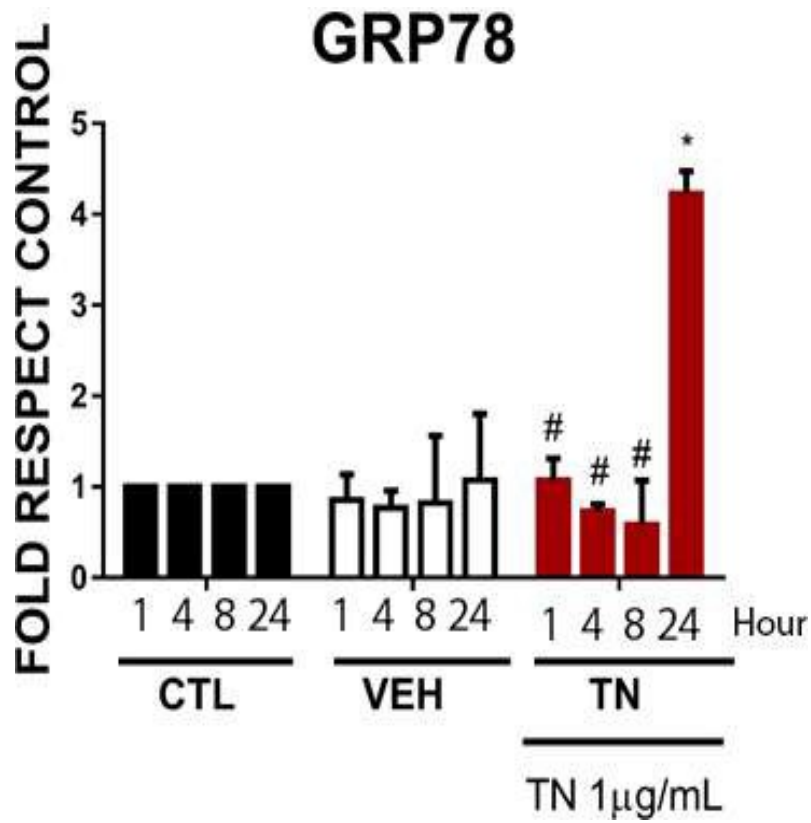

**Supplemental Figure S2.** Endogenous GRP78 levels after Tun treatment. Bar graft representing average fold change ( $\pm$  SEM) of GRP78 level in NSC-34 cells after 1, 4, 8 and 24 h of Tun treatment by immunoblotting (\* $p < 0.05$ , Student's t-test vs Veh; # $p < 0.05$ , Student's t-test vs TN 24h).

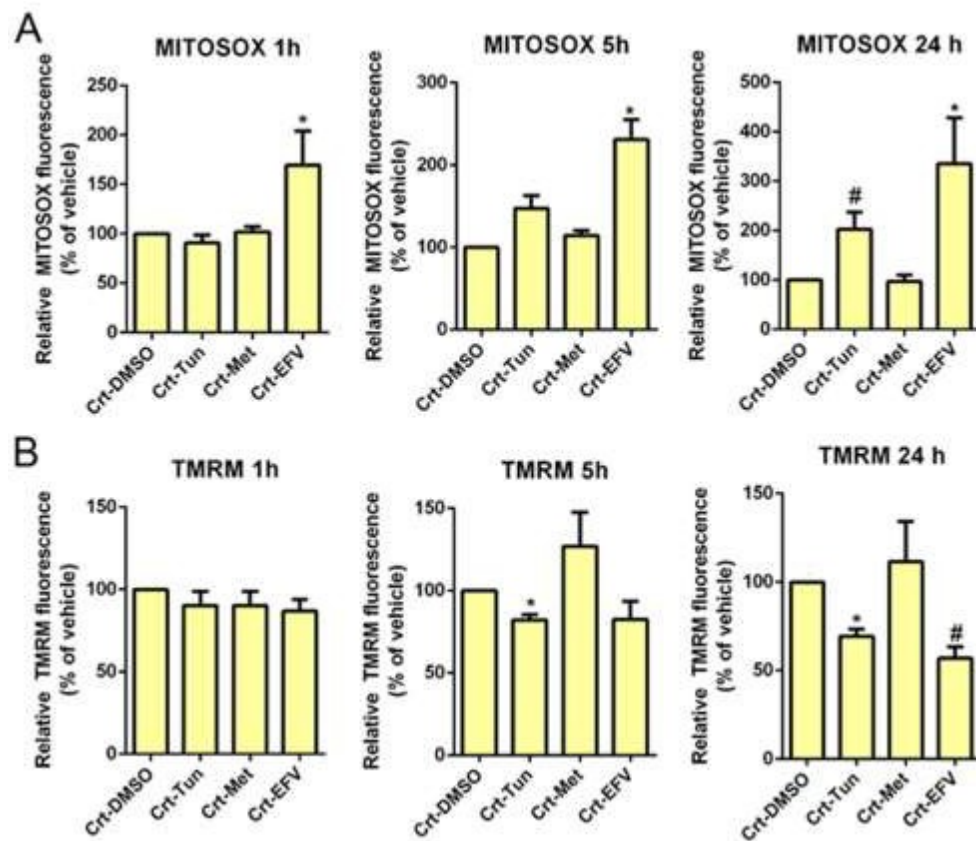

**Supplemental Figure S3. Tun and EFV cause mitochondrial dysfunction in NSC34 cells. (A)** Quantitative analysis of mitochondrial superoxide production (MitoSOX fluorescence) by NSC34 cells after 1, 5, and 24 h in the presence of 1  $\mu\text{g/mL}$  Tun or 10  $\mu\text{M}$  EFV. (**n**=4; \* $p$  < 0.05, Student's t-test vs Control-Methanol, # $p$  < 0.05, Student's t-test vs Control-DMSO) **(B)** Quantitative analysis of  $\Delta\psi\text{m}$  (TMRM fluorescence) in NSC34 cells after 1, 5, and 24 h in the presence of 1  $\mu\text{g/mL}$  Tun or 10  $\mu\text{M}$  EFV (**n**=4; # $p$  < 0.05, Student's t-test vs Control-Methanol, \* $p$  < 0.05, Student's t-test vs Control-DMSO)

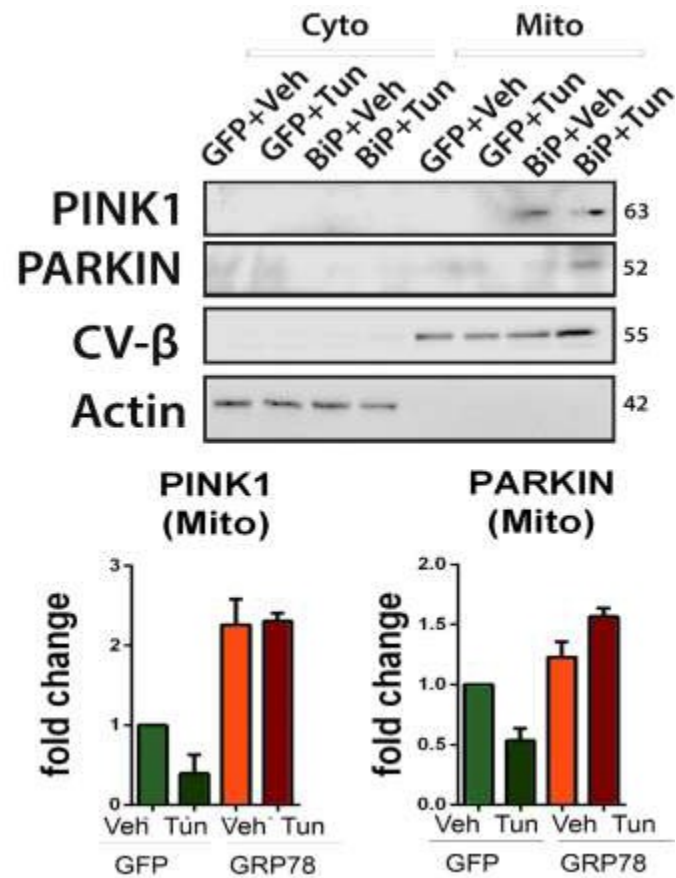

**Supplemental Figure S4.** *Top*, Western blots for indicated proteins in the mitochondrial (mito) and cytosolic (cyto) pooled fractions from GFP- or GRP78-overexpressing cells treated with vehicle or Tun for 5 hours. *Bottom*, Bar graphs of the average fold change of PINK1 and PARKIN, in both pooled fractions relative to actin (cytosol) or the beta subunit of the complex V (CV-β) (mitochondria) in GFP group.

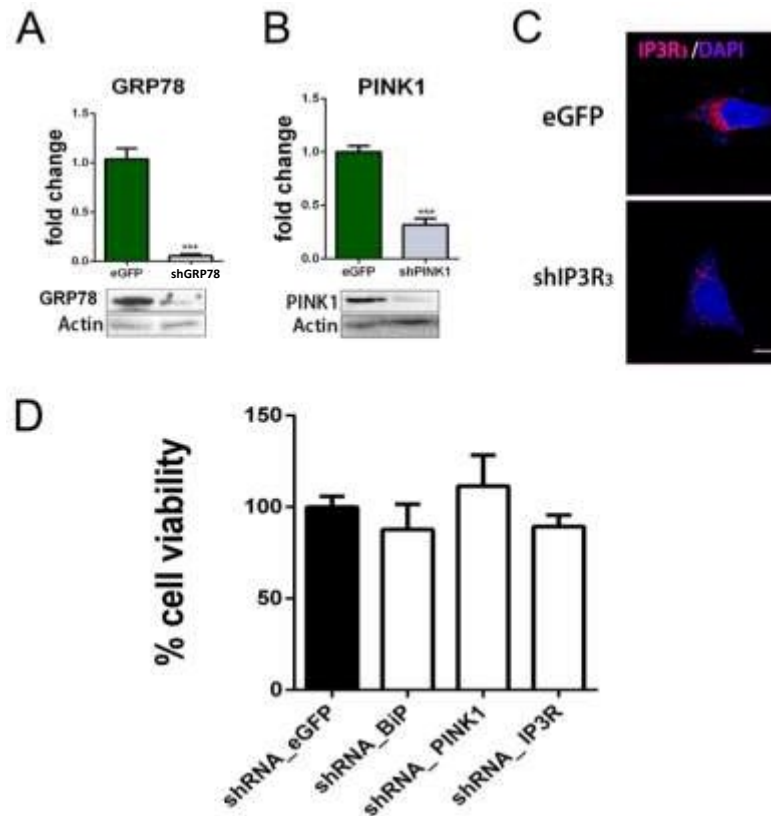

**Supplemental Figure S5. Cell viability analysis after shRNA nucleofection.** (A) Western blot and quantitation of GRP78 levels in cells nucleofected with sh-GRP78 compared to sh-eGFP cells (n =3; \*p < 0.05, Student's t-test). (B) Western blot and quantitation of PINK1 levels in cells nucleofected with sh-PINK1 cells compared to sh-eGFP cells (n=3; \*p < 0.05, Student's t-test). (C) Representative microphotographs of cells stained for IP<sub>3</sub>R (red) that express sh-IP3R or sh-eGFP. Scale bar = 10 μm. (D) NSC-34 were nucleofected with different shRNA and cell viability was assessed by MTT assay. No significant differences were observed.



## SUPPLEMENTARY TABLES AND HEADINGS

Supplementary Table S1: Altered proteins by Ad-GRP78-dr iven overexpression after RA

| Protein | Description                                                                                                                                                                | Gene Name           | Entry Name   | late Fold Ch | Std. Error                                                                                    | t value                                                                                                                                         | DF   | p value | adj. p val |
|---------|----------------------------------------------------------------------------------------------------------------------------------------------------------------------------|---------------------|--------------|--------------|-----------------------------------------------------------------------------------------------|-------------------------------------------------------------------------------------------------------------------------------------------------|------|---------|------------|
| B2RYV9  | Fumarylacetoacetate hydrolase domain-containing protein 2                                                                                                                  | Fahd2Fahd2a         | FAHD2_RA T   | -2,1812718   | 0,118700273                                                                                   | -18,376299                                                                                                                                      | 94   | 0       |            |
| 035095  | Neurochondrin (Neurite outgrowth-related protein from the rat brain) (Norbin)                                                                                              | Nodn                | NCDN_RAT     | -1,0528397   | 0,110281922                                                                                   | -9,5468018                                                                                                                                      | 326  |         |            |
| 035112  | CD166 antigen (Activated leukocyte cell adhesion molecule)                                                                                                                 | Alcam               | CD166_RAT    | -4,9319568   | 0,161832012                                                                                   | -30,47578                                                                                                                                       | 36   |         |            |
| 035964  | Endophilin-A2 (Endophilin-2)                                                                                                                                               | Sh3gl Sh3p8         | SH3GL_RAT    | -1,820209    | 0,082638727                                                                                   | -22,026102                                                                                                                                      | 56   |         |            |
| P01026  | Complement C3                                                                                                                                                              | C3                  | C03_RAT      | 0,54585685   | 0,062336647                                                                                   | 8,75659622                                                                                                                                      | 328  |         |            |
| P05506  | NADH-ubiquinone oxidoreductase chain 3 (EC 1.6.5.3) (NADH dehydrogenase subunit3)                                                                                          | Mtnd3 mt-Nd3 Nd3    | NU3M_RAT     | -8,5750847   | 0,057716091                                                                                   | -148,57355                                                                                                                                      | 11   |         |            |
| P05545  | Serine protease inhibitor A3K (Serpin A3K)                                                                                                                                 | Serpina3k Spin2b    | SPA3K_RA T   | 3,4323342    | 0,10775417                                                                                    | 31,8533771                                                                                                                                      | 116  |         |            |
| P09812  | Glycogen phosphorylase, muscle form (EC 2.4.1.1) (Myophosphorylase)                                                                                                        | Pygm                | PYGM_RAT     | -1,0857768   | 0,072539943                                                                                   | -14,967986                                                                                                                                      | 239  |         |            |
| P11442  | Clathrin heavy chain 1                                                                                                                                                     | Cite                | CLHI_RAT     | -0,3627843   | 0,040986509                                                                                   | -8,8513094                                                                                                                                      | 1787 |         |            |
| P13437  | 3-ketoacyl-CoA thiolase, mitochondrial (EC 2.3.1.16) (Acetyl-CoA acyltransferase) (Beta-ketothiolase) (Mitochondrial 3-oxoacyl-CoA thiolase)                               | Acaa2               | THIM_RA T    | -1,1426851   | 0,070237659                                                                                   | -16,268838                                                                                                                                      | 168  |         |            |
| P16036  | Phosphate carrier protein, mitochondrial (Phosphate transport protein) (PTP) (Solute carrier family 25 member 3)                                                           | Slc2Sa3Phc          | MPCP_RAT     | -2,6860151   | 0,230222996                                                                                   | -11,667015                                                                                                                                      | 65   |         |            |
| P16086  | Spectrin alpha chain, non-erythrocytic 1 (Alpha-II spectrin) (Fodrin alpha chain)                                                                                          | Sptani Sptna2 Spta2 | SPTNI_RAT    | -1,0248172   | 0,032157297                                                                                   | -31,868885                                                                                                                                      | 1298 |         |            |
| P19527  | (Neurofilamenttriplet L-protein)                                                                                                                                           | Nefi Nf68 Nfi       | NFL_RAT      | -1,4169231   | 0,060766211                                                                                   | -23,317615                                                                                                                                      | 410  |         |            |
| P26284  | Pyruvate dehydrogenase E1 component subunit alpha, somatic form, mitochondrial (EC 1.2.4.-1) (PDHE1-A type I)                                                              | Pdhal               | ODPA_RAT     | -0,9490399   | 0,086269588                                                                                   | -11,000863                                                                                                                                      | 419  |         |            |
| P34067  | Proteasome subunit beta type-4 (EC 3.4.25.1)                                                                                                                               | Psmb4               | PSB4_RAT     | 1,38238426   | 0,12870326                                                                                    | 10,7408644                                                                                                                                      | 137  |         |            |
| P35281  | Ras-related protein Rab-10                                                                                                                                                 | Rab1O               | RABI_O_RA T  | -1,7649011   | 0,115035137                                                                                   | -15,342278                                                                                                                                      | 58   |         |            |
| P60901  | Proteasome subunit alpha type-6 (EC 3.4.25.1)                                                                                                                              | Psm6a               | PSA6_RAT     | -1,0130042   | 0,079516503                                                                                   | -12,739547                                                                                                                                      | 133  |         |            |
| P62762  | Visinin-like protein 1 (VILIP) (21 kDa CABP) (Neural visinin-like protein 1) (NVL-1) (NVP-1)                                                                               | Vsnll Visil         | VISLI_RAT    | -1,5839876   | 0,095112227                                                                                   | -16,65388                                                                                                                                       | 228  |         |            |
| P62824  | Ras-related protein Rab-3C                                                                                                                                                 | Rab3c               | RAB3C_RAT    | -2,8410711   | 0,112469159                                                                                   | -25,26089                                                                                                                                       | 53   |         |            |
| Q3MIE4  | Synaptic vesicle membrane protein VAT-1 homolog (Mitofusin-binding protein) (Protein MIB)                                                                                  | Vatl                | VATI_RAT     | -1,211927    | 0,099689021                                                                                   | -12,157076                                                                                                                                      | 238  |         |            |
| Q63041  | Alpha-1-macroglobulin (Alpha-1-M)                                                                                                                                          | Alm Pzp             | Al_M_RAT     | 0,57974211   | 0,05303946                                                                                    | 10,9303925                                                                                                                                      | 429  |         |            |
| Q64057  | Alpha-aminoadipic semialdehyde dehydrogenase (Alpha-AASA dehydrogenase) (EC 1.2.1.31)                                                                                      | Aldh7a1 Ald7al      | AL7AI_RA T   | -1,242213    | 0,048861086                                                                                   | -25,42336                                                                                                                                       | 191  |         |            |
| Q641W2  | UPF0160 protein MYG1, mitochondrial                                                                                                                                        | Mygl C12orf10       | MYGI_RAT     | -2,2235785   | 0,103885872                                                                                   | -21,40405                                                                                                                                       | 42   |         |            |
| Q641Y2  | NADH dehydrogenase [ubiquinone] iron-sulfur protein 2, mitochondrial (EC 1.6.5.3) (EC 1.6.99.3) (Complex I-49kD) (CI-49kD) (NADH-ubiquinone oxidoreductase 49 kDa subunit) | Ndufs2              | NDUS2_RA T   | -2,624384    | 0,11807109                                                                                    | -22,227152                                                                                                                                      | 55   |         |            |
| Q64537  | Calpain small subunit 1 (CSS1) (Calcium-activated neutral proteinase small subunit)                                                                                        | Capnsl Capn4 Cssl   | CPNSI_RAT    | -1,0204072   | 0,106567993                                                                                   | -9,5751749                                                                                                                                      | 135  |         |            |
| Q80230  | Protein phosphatase 1E (EC 3.1.3.-16) (Ca(2+)/calmodulin-dependent protein kinase phosphataseN)                                                                            | PpmleCamkn          | PPMIE_RAT    | 2,82690387   | 0,161772097                                                                                   | 17,4746073                                                                                                                                      | 31   |         |            |
| Q8VHF5  | Citrate synthase, mitochondrial (EC 2.3.3.1)                                                                                                                               | Cs                  | CISY_RAT     | -1,5929535   | 0,098764169                                                                                   | -16,128861                                                                                                                                      | 162  |         |            |
| Q9QWN8  | Spectrin beta chain, non-erythrocytic 2 (Beta Spill sigma 1)                                                                                                               | Sptbn2Sptnb3        | SPTN2_RA T   | -2,0557489   | 0,098883861                                                                                   | -20,789529                                                                                                                                      | 92   |         |            |
| P05708  | Hexokinase-1 (EC 2.7.1.1) (Brain form hexokinase)                                                                                                                          | Hkl                 | HXKI_RAT     | -0,8129915   | 0,057370355                                                                                   | -14,170934                                                                                                                                      | 372  |         |            |
| P11240  | Cytochrome c oxidase subunit SA, mitochondrial (Cytochrome c oxidase polypeptide Va)                                                                                       | CoxSa               | COXSA_RAT    | -3,3731214   | 0,185112385                                                                                   | -18,222019                                                                                                                                      | 104  |         |            |
| P12785  | Fatty acid synthase (EC2.3.1.8S)                                                                                                                                           | Fasn                | FAS_RAT      | 0,51732605   | 0,047031979                                                                                   | 10,9994533                                                                                                                                      | 1042 |         |            |
| P15589  | Steryl-sulfatase (EC3.-1.6.2)                                                                                                                                              | Sts                 | STS_RAT      | -4,6862027   | 0,117625205                                                                                   | -39,840124                                                                                                                                      | 26   |         |            |
| P16884  | Neurofilament heavy polypeptide (NF-H) (200 kDa neurofilament protein) (Neurofilament triplet H protein)                                                                   | Nefh Nfh            | NFH_RA T     | -2,4832361   | 0,127072683                                                                                   | -19,541856                                                                                                                                      | 251  |         |            |
| P19139  | Casein kinase II subunit alpha (CK II alpha) (EC 2.7.11.J)                                                                                                                 | Csnk2al             | CSK21_RAT    | -1,1041471   | 0,106336343                                                                                   | -10,383535                                                                                                                                      | 134  |         |            |
| P21396  | Amine oxidase [flavin-containing] A (EC 1.4.-3.4) (Monoamine oxidase type A) (MAO-A)                                                                                       | Maoa                | AOFA_RA T    | -3,0188276   | 0,083800037                                                                                   | -36,02418                                                                                                                                       | 35   |         |            |
| P23565  | Alpha-internexin (Alpha-Inx)                                                                                                                                               | Inalnexa            | AINX_RA T    | -1,4622248   | 0,084515969                                                                                   | -17,301166                                                                                                                                      | 189  |         |            |
| P23978  | Sodium- and chloride-dependent GABA transporter 1 (GAT-1) (Solute carrier family 6 member 1)                                                                               | Slc6al Gatbl Gat-1  | SC6AI_RAT    | -2,6817129   | 0,123585537                                                                                   | -21,699246                                                                                                                                      | 54   |         |            |
| P25093  | Fumarylacetoacetase (FAA) (EC 3.7.1.2) (Beta-diketetonase) (Fumarylacetoacetate hydrolase)                                                                                 | Fah                 | FAAA_RAT     | 3,48656621   | 0,076693655                                                                                   | 45,4609472                                                                                                                                      | 38   |         |            |
| P31016  | Disks large homolog 4 (Postsynaptic density protein 95) (PSD-95) (Synapse-associated protein 90) (SAP-90) (SAP90)                                                          | Dlg4 Dlg44 Psd95    | DLG4_RAT     | -3,8855696   | 0,205595114                                                                                   | -18,899134                                                                                                                                      | 26   |         |            |
| P32551  | Cytochrome b-c1 complex x subunit 2, mitochondrial (Comple x III subunit 2) (Core protein 11) (Ubiquinol-cytochrome-c reductase complex core protein 2)                    | Uqcrc2              | QCR2_RAT     | -1,6429346   | 0,057175893                                                                                   | -28,734743                                                                                                                                      | 151  |         |            |
| P38659  | Protein disulfide-isomerase A4 (EC S. 3.4.-1) (CaBP2) (ERp72)                                                                                                              | Pdia4 Cabp2 Erp70   | PDIA4_RA T   | -1,4699363   | 0,070408879                                                                                   | -20,877144                                                                                                                                      | 52   |         |            |
| P46844  | Biliverdin reductase A (BVR A) (EC 1.3.1.24) (Biliverdin-IX alpha-reductase)                                                                                               | Bilvra Bilvr        | BIEA_RA T    | 1,2923408    | 0,112095568                                                                                   | 11,5289196                                                                                                                                      | 130  |         |            |
| P62243  | 40S ribosomal protein S8                                                                                                                                                   | Rps8                | RS8_RAT      | -1,7725098   | 0,059413326                                                                                   | -29,83354                                                                                                                                       | 113  |         |            |
| P63047  | Sulfotransferase 4Al (ST4Al) (EC 2.8.2.-) (Brain sulfotransferase-like protein) (BR-STL) (Nervous system sulfotransferase) (NST)                                           | Sult4a1 Sultx3      | ST4AI_RA T   | -1,4767043   | 0,117738449                                                                                   | -12,542457                                                                                                                                      | 97   |         |            |
| P81155  | Voltage-dependent anion-selective channel protein 2 (VDAC-2) (B36-VDAC) (Outer mitochondrial membrane protein porin 2)                                                     | Vdac2               | VDAC2_RAT    | -1,6426814   | 0,065908766                                                                                   | -24,923565                                                                                                                                      | 169  |         |            |
| P85969  | Beta-soluble NSF attachment protein (SNAP-beta) (N-ethylmaleimide-sensitive factor attachment protein beta)                                                                | NapbSnapb           | SNAB_RAT     | -0,9268229   | 0,058569202                                                                                   | -15,824407                                                                                                                                      | 267  |         |            |
| Q00981  | Ubiquitin carboxyl-terminal hydrolase isozyme L1 (UCH-L1) (EC 3.4.19.12) (EC 6.-.-.-) (Neuron cytoplasmic protein 9.5) (PGP 9.5) (PGP9.5) (Ubiquitin thioesterase L1)      | Uchll               | UCHLI_RA T   | -0,9831311   | 0,107885145                                                                                   | -9,1127569                                                                                                                                      | 353  |         |            |
| Q562C6  | Leucinezippertranscription factor-like protein 1                                                                                                                           | Lztfll              | LZTLI_RA T   | -2,2173938   | 0,078741878                                                                                   | -28,160286                                                                                                                                      | 70   |         |            |
| Q5X172  | Eukaryotic translation initiation factor 4H (eIF-4H) (Williams-Beuren syndrome chromosomal region 1 protein homolog)                                                       | Eif4h Wbscr1        | IF4H_RA T    | 2,00629568   | 0,086560472                                                                                   | 23,177966                                                                                                                                       | 92   |         |            |
| Q63377  | Sodium/potassium-transporting ATPase subunit beta-3 (Sodium/potassium-dependent ATPase subunit beta-3) (ATPB-3) (CD antigen CD298)                                         | Atp1b3              | AT1B3_RA T   | -2,5703051   | 0,192577582                                                                                   | -13,346855                                                                                                                                      | 56   |         |            |
| Q6AYT5  | UPF0364 protein C6orf211 homolog                                                                                                                                           | -                   | CF211_RA T   | -1,5743413   | 0,089358356                                                                                   | -17,618288                                                                                                                                      | 55   |         |            |
| Q77P36  | Protein Shroom2 (Liver regeneration-related protein LRRG167) (Protein Apxl) Shroom2 Apxd Ab2-404 SHRM_2_RAT                                                                | -                   | -            | 3,05766396   | 0,13842498                                                                                    | 22,0889608                                                                                                                                      | 56   |         |            |
| Q9QUL6  | Vesicle-fusing ATPase (EC 3.6.4.6) (N-ethylmaleimide-sensitive fusion                                                                                                      | -                   | -            | -            | -                                                                                             | -                                                                                                                                               | -    | -       | -          |
| 008618  | P63039 P67874 P84092 Q388QO                                                                                                                                                | prote (in)          | n prote (in) | d prot ein 2 | (41 kDa phosphoribosypyrophosphate synthetase- associated protein) (PAP41)                    | mitochondrial (EC 2.3.1.9 ) (Acetoacetyl-CoA thiolase) 60S acidic ribosomal protein PO (60S ribosomal protein L1OE) Hemopexin                   |      |         |            |
| P07340  | Q4KM49                                                                                                                                                                     | M-Phos              | NSF          | (PR          | ATP synthase subunit gamma, mitochondrial (F-ATPase gamma subunit) Rabphilin-3A (Exophilin-1) | ATP synthase subunit gamma, mitochondrial (F-ATPase gamma subunit) Rabphilin-3A (Exophilin-1)                                                   |      |         |            |
| P17764  | Q63560Q6P7B0                                                                                                                                                               | tive fusio          | phori bosyl  | synt has     | (PAP41) Sodium/potassium-transporting ATPase subunit beta-1                                   | ATP-sensitive inward rectifier potassium channel 10 (BIRIO) (BIRKI) 60S ribosomal protein L7a                                                   |      |         |            |
| P19945  |                                                                                                                                                                            | n prote (in)        | pyrop hosp   | e- asso      | transporting ATPase subunit beta-1                                                            | 60 kDa heat shock protein, mitochondrial (60 kDa chaperonin) (Chaperonin60) (CPN60) (HSP-6S) (HSP-60) (Hsp60) (Mitochondrial matrix protein Pi) |      |         |            |
| P20059  |                                                                                                                                                                            | (Vesi               | synth        | d            | (Sodium/potassium-dependent ATPase subunit beta-1)                                            | Casein kinase II subunit beta (CK II beta) (Phosvitin)                                                                                          |      |         |            |
| P35435  |                                                                                                                                                                            | cular               | ase- asso    | prot ein     | subunit beta-1) Acetyl-CoA                                                                    | AP-2 complex subunit mu (AP-2 mu chain)                                                                                                         |      |         |            |
| P47709  |                                                                                                                                                                            | -                   | asso         | prot ein     | acetyltransferase,                                                                            | Microtubule-associated protein RP/EB family member 2 Tyrosine-tRNA ligase, cytoplasmic (EC 6.1.1.1 ) (Tyrosine-tRNA synthetase)                 |      |         |            |
| P49655  |                                                                                                                                                                            | fusio               | ciate        | 2)           | -                                                                                             | -                                                                                                                                               |      |         |            |
| P62425  |                                                                                                                                                                            | -                   | -            | -            | -                                                                                             | -                                                                                                                                               |      |         |            |

|                                                                                                                                                                                                                                                                                                                             |                                                                                                                                                                                                                                                                                                                                                                                                                                                                                                                                                                                                                                                                                                                                                                                                                                                                                                                                                                                                                                                                                                                                                                                                                                                                                                                                                                                                                                                                                                                                                                                                                                                                                                                                                                                                                                                                                                                                                                                                                                                                                                                                                                                                                                                                                                                                                                                                                                                                                                                                                                                                                                                                                                                                                                                                                                                                                                                                                                                                                                                                                                                                                                                                                                                                                                                                                                                                                                                                                                                                                                                                                                                                                                                                                                                                                                                                                                                                                                                                                                                                                                                                                                                                                                                                                                                                                                                                                                                                                                                                                                                                                                                                                                                                                                                                                                                                                                                                                                                                                                                                                                                                                                                                                                                                                                                                                                                                                                                                                                                                                                                                                                                                                                                                                                                                                                                                                                                                                                                                                                                                                                                                                                                                                                                                                                                                                                                                                                                                                                                                                                                                                                                                                                                                                                                                                                                                                                                                                                                                                                                                                                                                                                                                                                                                                                                                                                                                                                                                                                                                                                                                                                                                                                                                                                                                                                                                                                                                                                                                                                                                                                                                                                                                                                                                                                                                                                                                                                                                                                                                                                                                                                                                                                                                                                                                                                                                                                                                                                                                                                                                                                                                                                                                                                                                                                                                                                                                                                                                                                                                                                                                                                                                                                                                                                                                                                                                                                                                                                                                                                                                                                                                                                                                                                                                                                                                                                                                                                                                                                                                                                                                                                                                                                                                                                                                                                                                                                                                                                                                                                                                                                                                                                                                                                                                                                                                                                                                                     |
|-----------------------------------------------------------------------------------------------------------------------------------------------------------------------------------------------------------------------------------------------------------------------------------------------------------------------------|---------------------------------------------------------------------------------------------------------------------------------------------------------------------------------------------------------------------------------------------------------------------------------------------------------------------------------------------------------------------------------------------------------------------------------------------------------------------------------------------------------------------------------------------------------------------------------------------------------------------------------------------------------------------------------------------------------------------------------------------------------------------------------------------------------------------------------------------------------------------------------------------------------------------------------------------------------------------------------------------------------------------------------------------------------------------------------------------------------------------------------------------------------------------------------------------------------------------------------------------------------------------------------------------------------------------------------------------------------------------------------------------------------------------------------------------------------------------------------------------------------------------------------------------------------------------------------------------------------------------------------------------------------------------------------------------------------------------------------------------------------------------------------------------------------------------------------------------------------------------------------------------------------------------------------------------------------------------------------------------------------------------------------------------------------------------------------------------------------------------------------------------------------------------------------------------------------------------------------------------------------------------------------------------------------------------------------------------------------------------------------------------------------------------------------------------------------------------------------------------------------------------------------------------------------------------------------------------------------------------------------------------------------------------------------------------------------------------------------------------------------------------------------------------------------------------------------------------------------------------------------------------------------------------------------------------------------------------------------------------------------------------------------------------------------------------------------------------------------------------------------------------------------------------------------------------------------------------------------------------------------------------------------------------------------------------------------------------------------------------------------------------------------------------------------------------------------------------------------------------------------------------------------------------------------------------------------------------------------------------------------------------------------------------------------------------------------------------------------------------------------------------------------------------------------------------------------------------------------------------------------------------------------------------------------------------------------------------------------------------------------------------------------------------------------------------------------------------------------------------------------------------------------------------------------------------------------------------------------------------------------------------------------------------------------------------------------------------------------------------------------------------------------------------------------------------------------------------------------------------------------------------------------------------------------------------------------------------------------------------------------------------------------------------------------------------------------------------------------------------------------------------------------------------------------------------------------------------------------------------------------------------------------------------------------------------------------------------------------------------------------------------------------------------------------------------------------------------------------------------------------------------------------------------------------------------------------------------------------------------------------------------------------------------------------------------------------------------------------------------------------------------------------------------------------------------------------------------------------------------------------------------------------------------------------------------------------------------------------------------------------------------------------------------------------------------------------------------------------------------------------------------------------------------------------------------------------------------------------------------------------------------------------------------------------------------------------------------------------------------------------------------------------------------------------------------------------------------------------------------------------------------------------------------------------------------------------------------------------------------------------------------------------------------------------------------------------------------------------------------------------------------------------------------------------------------------------------------------------------------------------------------------------------------------------------------------------------------------------------------------------------------------------------------------------------------------------------------------------------------------------------------------------------------------------------------------------------------------------------------------------------------------------------------------------------------------------------------------------------------------------------------------------------------------------------------------------------------------------------------------------------------------------------------------------------------------------------------------------------------------------------------------------------------------------------------------------------------------------------------------------------------------------------------------------------------------------------------------------------------------------------------------------------------------------------------------------------------------------------------------------------------------------------------------------------------------------------------------------------------------------------------------------------------------------------------------------------------------------------------------------------------------------------------------------------------------------------------------------------------------------------------------------------------------------------------------------------------------------------------------------------------------------------------------------------------------------------------------------------------------------------------------------------------------------------------------------------------------------------------------------------------------------------------------------------------------------------------------------------------------------------------------------------------------------------------------------------------------------------------------------------------------------------------------------------------------------------------------------------------------------------------------------------------------------------------------------------------------------------------------------------------------------------------------------------------------------------------------------------------------------------------------------------------------------------------------------------------------------------------------------------------------------------------------------------------------------------------------------------------------------------------------------------------------------------------------------------------------------------------------------------------------------------------------------------------------------------------------------------------------------------------------------------------------------------------------------------------------------------------------------------------------------------------------------------------------------------------------------------------------------------------------------------------------------------------------------------------------------------------------------------------------------------------------------------------------------------------------------------------------------------------------------------------------------------------------------------------------------------------------------------------------------------------------------------------------------------------------------------------------------------------------------------------------------------------------------------------------------------------------------------------------------------------------------------------------------------------------------------------------------------------------------------------------------------------------------------------------------------------------------------------------------------------------------------------------------------------------------------------------------------------------------------------------------------------------------------------------------------------------------------------------------------------------------------------------------------------------------------------------------------------------------------------------------------------------------------------------------------------------------------------------------------------------------------------------------------------------------------------------------------------------------------------------------------------------------------------------------------------------------------------------------------------|
| (TyrRS<br>)<br>Microtu<br>bule-<br>associa<br>ted<br>protein<br>6<br>(MAP-<br>6) (14S-<br>kDa<br>STOP)<br>(STOP1<br>45)<br>(Stable<br>tubule-<br>only<br>polype<br>ptide)<br>(STOP)<br>Trypt<br>phan-<br>tRNA<br>ligase,<br>cytopla<br>smic<br>(EC<br>6.1.1.<br>2)<br>(Trypt<br>phan-<br>tRNA<br>synthe<br>tase)(T<br>rpRS) | NsfErgI<br><br>Prpsap2<br><br>AtpIbl<br><br>AcatI RplpO Artp<br>Hp,<br>AtpScl Atp5cRph3a Kcnj1OKab-2 Rpl7a<br><br>Hspdl Hsp60<br><br>Csnk.2bCk2nAp2m1 Mapre2<br><br>Yars<br><br>Map6Mtap6 Wars<br><br><br><br><br><br><br><br><br><br><br><br><br><br><br><br><br><br><br><br><br><br><br><br><br><br><br><br><br><br><br><br><br><br><br><br><br><br><br><br><br><br><br><br><br><br><br><br><br><br><br><br><br><br><br><br><br><br><br><br><br><br><br><br><br><br><br><br><br><br><br><br><br><br><br><br><br><br><br><br><br><br><br><br><br><br><br><br><br><br><br><br><br><br><br><br><br><br><br><br><br><br><br><br><br><br><br><br><br><br><br><br><br><br><br><br><br><br><br><br><br><br><br><br><br><br><br><br><br><br><br><br><br><br><br><br><br><br><br><br><br><br><br><br><br><br><br><br><br><br><br><br><br><br><br><br><br><br><br><br><br><br><br><br><br><br><br><br><br><br><br><br><br><br><br><br><br><br><br><br><br><br><br><br><br><br><br><br><br><br><br><br><br><br><br><br><br><br><br><br><br><br><br><br><br><br><br><br><br><br><br><br><br><br><br><br><br><br><br><br><br><br><br><br><br><br><br><br><br><br><br><br><br><br><br><br><br><br><br><br><br><br><br><br><br><br><br><br><br><br><br><br><br><br><br><br><br><br><br><br><br><br><br><br><br><br><br><br><br><br><br><br><br><br><br><br><br><br><br><br><br><br><br><br><br><br><br><br><br><br><br><br><br><br><br><br><br><br><br><br><br><br><br><br><br><br><br><br><br><br><br><br><br><br><br><br><br><br><br><br><br><br><br><br><br><br><br><br><br><br><br><br><br><br><br><br><br><br><br><br><br><br><br><br><br><br><br><br><br><br><br><br><br><br><br><br><br><br><br><br><br><br><br><br><br><br><br><br><br><br><br><br><br><br><br><br><br><br><br><br><br><br><br><br><br><br><br><br><br><br><br><br><br><br><br><br><br><br><br><br><br><br><br><br><br><br><br><br><br><br><br><br><br><br><br><br><br><br><br><br><br><br><br><br><br><br><br><br><br><br><br><br><br><br><br><br><br><br><br><br><br><br><br><br><br><br><br><br><br><br><br><br><br><br><br><br><br><br><br><br><br><br><br><br><br><br><br><br><br><br><br><br><br><br><br><br><br><br><br><br><br><br><br><br><br><br><br><br><br><br><br><br><br><br><br><br><br><br><br><br><br><br><br><br><br><br><br><br><br><br><br><br><br><br><br><br><br><br><br><br><br><br><br><br><br><br><br><br><br><br><br><br><br><br><br><br><br><br><br><br><br><br><br><br><br><br><br><br><br><br><br><br><br><br><br><br><br><br><br><br><br><br><br><br><br><br><br><br><br><br><br><br><br><br><br><br><br><br><br><br><br><br><br><br><br><br><br><br><br><br><br><br><br><br><br><br><br><br><br><br><br><br><br><br><br><br><br><br><br><br><br><br><br><br><br><br><br><br><br><br><br><br><br><br><br><br><br><br><br><br><br><br><br><br><br><br><br><br><br><br><br><br><br><br><br><br><br><br><br><br><br><br><br><br><br><br><br><br><br><br><br><br><br><br><br><br><br><br><br><br><br><br><br><br><br><br><br><br><br><br><br><br><br><br><br><br><br><br><br><br><br><br><br><br><br><br><br><br><br><br><br><br><br><br><br><br><br><br><br><br><br><br><br><br><br><br><br><br><br><br><br><br><br><br><br><br><br><br><br><br><br><br><br><br><br><br><br><br><br><br><br><br><br><br><br><br><br><br><br><br><br><br><br><br><br><br><br><br><br><br><br><br><br><br><br><br><br><br><br><br><br><br><br><br><br><br><br><br><br><br><br><br><br><br><br><br><br><br><br><br><br><br><br><br><br><br><br><br><br><br><br><br><br><br><br><br><br><br><br><br><br><br><br><br><br><br><br><br><br><br><br><br><br><br><br><br><br><br><br><br><br><br><br><br><br><br><br><br><br><br><br><br><br><br><br><br><br><br><br><br><br><br><br><br><br><br><br><br><br><br><br><br><br><br><br><br><br><br><br><br><br><br><br><br><br><br><br><br><br><br><br><br><br><br><br><br><br><br><br><br><br><br><br><br><br><br><br><br><br><br><br><br><br><br><br><br><br><br><br><br><br><br><br><br><br><br><br><br><br><br><br><br><br><br><br><br><br><br><br><br><br><br><br><br><br><br><br><br><br><br><br><br><br><br><br><br><br><br><br><br><br><br><br><br><br><br><br><br><br><br><br><br><br><br><br><br><br><br><br><br><br><br><br><br><br><br><br><br><br><br><br><br><br><br><br><br><br><br><br><br><br><br><br><br><br><br><br><br><br><br><br><br><br><br><br><br><br><br><br><br><br><br><br><br><br><br><br><br><br><br><br><br><br><br><br><br><br><br><br><br><br><br><br><br><br><br><br><br><br><br><br><br><br><br><br><br><br><br><br><br><br><br><br><br><br><br><br><br><br><br><br><br><br><br><br><br><br><br><br><br><br><br><br><br><br><br><br><br><br><br><br><br><br><br><br><br><br><br><br><br><br><br><br><br><br><br><br><br><br><br><br><br><br><br><br><br><br><br><br><br><br><br><br><br><br><br><br><br><br><br><br><br><br><br><br><br><br><br><br><br><br><br><br><br><br><br><br><br><br><br><br><br><br><br><br><br><br><br><br><br><br><br><br><br><br><br><br><br><br><br><br><br><br><br><br><br><br><br><br><br><br><br><br><br><br><br><br><br><br><br><br><br><br><br><br><br><br><br><br><br><br><br><br><br><br><br><br><br><br><br><br><br><br><br><br><br><br><br><br><br><br><br><br><br><br><br><br><br><br><br><br><br><br><br><br><br><br><br><br><br><br><br><br><br><br><br><br><br><br><br><br><br><br><br><br><br><br><br><br><br><br><br><br><br><br><br><br><br><br><br><br><br><br><br><br><br><br><br><br><br><br><br><br><br><br><br><br><br><br><br><br><br><br><br><br><br><br><br><br><br><br><br><br><br><br><br><br><br><br><br><br><br><br><br><br><br><br><br><br><br><br><br><br><br><br><br><br><br><br><br><br><br><br><br><br><br><br><br><br><br><br><br><br><br><br><br><br><br><br><br><br><br><br><br><br><br><br><br><br><br><br><br><br><br><br><br><br><br><br><br><br><br><br><br><br><br><br><br><br><br><br><br><br><br><br><br><br><br><br><br><br><br><br><br><br><br><br><br><br><br><br><br><br><br><br><br><br><br><br><br><br><br><br><br><br><br><br><br><br><br><br><br><br><br><br><br><br><br><br><br><br><br><br><br><br><br><br><br><br><br><br><br><br><br><br><br><br><br><br><br><br><br><br><br><br><br><br><br><br><br><br><br><br><br><br><br><br><br><br><br><br><br><br><br><br><br><br><br><br><br><br><br><br><br><br><br><br><br><br><br><br><br><br><br><br><br><br><br><br><br><br><br><br><br><br><br><br><br><br><br><br><br><br><br><br><br><br><br><br><br><br><br><br><br><br><br><br><br><br><br><br><br><br><br><br><br><br><br><br><br><br><br><br><br><br><br><br><br><br><br><br><br><br><br><br><br><br><br><br><br><br><br><br><br><br><br><br><br><br><br><br><br><br><br><br><br><br><br><br><br><br><br><br><br><br><br><br><br><br><br><br><br><br><br><br><br><br><br><br><br><br><br><br><br><br><br><br><br><br><br><br><br><br><br><br><br><br><br><br><br><br><br><br><br><br><br><br><br><br><br><br><br><br><br><br><br><br><br><br><br><br><br><br><br><br><br><br><br><br><br><br><br><br><br><br><br><br><br><br><br><br><br><br><br><br><br><br><br><br><br><br><br><br><br><br><br><br><br><br><br><br><br><br><br><br><br><br><br><br><br><br><br><br><br><br><br><br><br><br><br><br><br><br><br><br><br><br><br><br><br><br><br><br><br><br><br><br><br><br><br><br><br><br><br><br><br><br><br><br><br><br><br><br><br><br><br><br><br><br><br><br><br><br><br><br><br><br><br><br><br><br><br><br><br><br><br><br><br><br><br><br><br><br><br><br><br><br><br><br><br><br><br><br><br><br><br><br><br><br><br><br><br><br><br><br><br><br><br><br><br><br><br><br><br><br><br><br><br><br><br><br><br><br><br><br><br><br><br><br><br><br><br><br><br><br><br><br><br><br><br><br><br><br><br><br><br><br><br><br><br><br><br><br><br><br><br><br><br><br><br><br><br><br><br><br><br><br><br><br><br><br><br><br><br><br><br><br><br><br><br><br><br><br><br><br><br><br><br><br><br><br><br><br><br><br><br><br><br><br><br><br><br><br><br><br><br><br><br><br><br><br><br><br><br><br><br><br><br><br><br><br><br><br><br><br><br><br><br><br><br><br><br><br><br><br><br><br><br><br><br><br><br><br><br><br><br><br><br><br><br><br><br><br><br><br><br><br><br><br><br><br><br><br><br><br><br><br><br><br><br><br><br><br><br><br><br><br><br><br><br><br><br><br><br><br><br><br><br><br><br><br><br><br><br><br><br><br><br><br><br><br><br><br><br><br><br><br><br><br><br><br><br><br><br><br><br><br><br><br><br><br><br><br><br><br><br><br><br><br><br><br><br><br><br><br><br><br><br><br><br><br><br><br><br><br><br><br><br><br><br><br><br><br><br><br><br><br><br><br><br><br><br><br><br><br><br><br><br><br><br><br><br><br><br><br><br><br><br><br><br><br><br><br><br><br><br><br><br><br><br><br><br><br><br><br><br><br><br><br><br><br><br><br><br><br><br><br><br><br><br><br><br><br><br><br><br><br><br><br><br><br><br><br><br><br><br><br><br><br><br><br><br><br><br><br><br><br><br><br><br><br><br><br><br><br><br><br><br><br><br><br><br><br><br><br><br><br><br><br><br><br><br><br><br><br><br><br><br><br><br><br><br><br><br><br><br><br><br><br><br><br><br><br><br><br><br><br><br><br><br><br><br><br><br><br><br><br><br><br><br><br><br><br><br><br><br><br><br><br><br><br><br><br><br><br><br><br><br><br><br><br><br><br><br><br><br><br><br><br><br><br><br><br><br><br><br><br><br><br><br><br><br><br><br><br><br><br><br><br><br><br><br><br><br><br><br><br><br><br><br><br><br><br><br><br><br><br><br><br><br><br><br><br><br><br><br><br><br><br><br><br><br><br><br><br><br><br><br><br><br><br><br><br><br><br><br><br><br><br><br><br><br><br><br><br><br><br><br><br><br><br><br><br><br><br><br><br><br><br><br><br><br><br><br><br><br><br><br><br><br><br><br><br><br><br><br><br><br><br><br><br><br><br><br><br><br><br><br><br><br><br><br><br><br><br><br><br><br><br><br><br><br><br><br><br><br><br><br><br><br><br><br><br><br><br><br><br><br><br><br><br><br><br><br><br><br><br><br><br><br><br><br><br><br><br><br><br><br><br><br><br><br><br><br><br><br><br><br><br><br><br><br><br><br><br><br><br><br><br><br><br><br><br><br><br><br><br><br><br><br><br><br><br><br><br><br><br><br><br><br><br><br><br><br><br><br><br><br><br><br><br><br><br><br><br><br><br><br><br><br><br><br><br><br><br><br><br><br><br><br><br><br><br><br><br><br><br><br><br><br><br><br><br><br><br><br><br><br><br><br><br><br><br><br><br><br><br><br><br><br><br><br><br><br><br><br><br><br><br><br><br><br><br><br><br><br><br><br><br><br><br><br><br><br><br><br><br><br><br><br><br><br><br><br><br><br><br><br><br><br><br><br><br><br><br><br><br><br><br><br><br><br><br><br><br><br><br><br><br><br><br><br><br><br><br><br><br><br><br><br><br><br><br><br><br><br><br><br><br><br><br><br><br><br><br><br><br><br><br><br><br><br><br><br><br><br><br><br><br><br><br><br><br><br><br><br><br><br><br><br><br><br><br><br><br><br><br><br><br><br><br><br><br><br><br><br><br><br><br><br><br><br><br><br><br><br><br><br><br><br><br><br><br><br><br><br><br><br><br><br><br><br><br><br><br><br><br><br><br><br><br><br><br><br><br><br><br><br><br><br><br><br><br><br><br><br><br><br><br><br><br><br><br><br><br><br><br><br><br><br><br><br><br><br><br><br><br><br><br><br><br><br><br><br><br><br><br><br><br><br><br><br><br><br><br><br><br><br><br><br><br><br><br>< |
|-----------------------------------------------------------------------------------------------------------------------------------------------------------------------------------------------------------------------------------------------------------------------------------------------------------------------------|---------------------------------------------------------------------------------------------------------------------------------------------------------------------------------------------------------------------------------------------------------------------------------------------------------------------------------------------------------------------------------------------------------------------------------------------------------------------------------------------------------------------------------------------------------------------------------------------------------------------------------------------------------------------------------------------------------------------------------------------------------------------------------------------------------------------------------------------------------------------------------------------------------------------------------------------------------------------------------------------------------------------------------------------------------------------------------------------------------------------------------------------------------------------------------------------------------------------------------------------------------------------------------------------------------------------------------------------------------------------------------------------------------------------------------------------------------------------------------------------------------------------------------------------------------------------------------------------------------------------------------------------------------------------------------------------------------------------------------------------------------------------------------------------------------------------------------------------------------------------------------------------------------------------------------------------------------------------------------------------------------------------------------------------------------------------------------------------------------------------------------------------------------------------------------------------------------------------------------------------------------------------------------------------------------------------------------------------------------------------------------------------------------------------------------------------------------------------------------------------------------------------------------------------------------------------------------------------------------------------------------------------------------------------------------------------------------------------------------------------------------------------------------------------------------------------------------------------------------------------------------------------------------------------------------------------------------------------------------------------------------------------------------------------------------------------------------------------------------------------------------------------------------------------------------------------------------------------------------------------------------------------------------------------------------------------------------------------------------------------------------------------------------------------------------------------------------------------------------------------------------------------------------------------------------------------------------------------------------------------------------------------------------------------------------------------------------------------------------------------------------------------------------------------------------------------------------------------------------------------------------------------------------------------------------------------------------------------------------------------------------------------------------------------------------------------------------------------------------------------------------------------------------------------------------------------------------------------------------------------------------------------------------------------------------------------------------------------------------------------------------------------------------------------------------------------------------------------------------------------------------------------------------------------------------------------------------------------------------------------------------------------------------------------------------------------------------------------------------------------------------------------------------------------------------------------------------------------------------------------------------------------------------------------------------------------------------------------------------------------------------------------------------------------------------------------------------------------------------------------------------------------------------------------------------------------------------------------------------------------------------------------------------------------------------------------------------------------------------------------------------------------------------------------------------------------------------------------------------------------------------------------------------------------------------------------------------------------------------------------------------------------------------------------------------------------------------------------------------------------------------------------------------------------------------------------------------------------------------------------------------------------------------------------------------------------------------------------------------------------------------------------------------------------------------------------------------------------------------------------------------------------------------------------------------------------------------------------------------------------------------------------------------------------------------------------------------------------------------------------------------------------------------------------------------------------------------------------------------------------------------------------------------------------------------------------------------------------------------------------------------------------------------------------------------------------------------------------------------------------------------------------------------------------------------------------------------------------------------------------------------------------------------------------------------------------------------------------------------------------------------------------------------------------------------------------------------------------------------------------------------------------------------------------------------------------------------------------------------------------------------------------------------------------------------------------------------------------------------------------------------------------------------------------------------------------------------------------------------------------------------------------------------------------------------------------------------------------------------------------------------------------------------------------------------------------------------------------------------------------------------------------------------------------------------------------------------------------------------------------------------------------------------------------------------------------------------------------------------------------------------------------------------------------------------------------------------------------------------------------------------------------------------------------------------------------------------------------------------------------------------------------------------------------------------------------------------------------------------------------------------------------------------------------------------------------------------------------------------------------------------------------------------------------------------------------------------------------------------------------------------------------------------------------------------------------------------------------------------------------------------------------------------------------------------------------------------------------------------------------------------------------------------------------------------------------------------------------------------------------------------------------------------------------------------------------------------------------------------------------------------------------------------------------------------------------------------------------------------------------------------------------------------------------------------------------------------------------------------------------------------------------------------------------------------------------------------------------------------------------------------------------------------------------------------------------------------------------------------------------------------------------------------------------------------------------------------------------------------------------------------------------------------------------------------------------------------------------------------------------------------------------------------------------------------------------------------------------------------------------------------------------------------------------------------------------------------------------------------------------------------------------------------------------------------------------------------------------------------------------------------------------------------------------------------------------------------------------------------------------------------------------------------------------------------------------------------------------------------------------------------------------------------------------------------------------------------------------------------------------------------------------------------------------------------------------------------------------------------------------------------------------------------------------------------------------------------------------------------------------------------------------------------------------------------------------------------------------------------------------------------------------------------------------------------------------------------------------------------------------------------------------------------------------------------------------------------------------------------------------------------------------------------------------------------------------------------------------------------------------------------------------------------------------|

|            |                                                                                                                                                                                                                                                                                                                                                             |                    |            |            |             |             |      |                   |
|------------|-------------------------------------------------------------------------------------------------------------------------------------------------------------------------------------------------------------------------------------------------------------------------------------------------------------------------------------------------------------|--------------------|------------|------------|-------------|-------------|------|-------------------|
| P08461     | Dihydropolypyllysine-residue acetyltransferase component of pyruvate dehydrogenase complex, mitochondrial (EC 2.3.1.12) (PDC-E2) (PDCE2)                                                                                                                                                                                                                    | Dlat               | ODP2_RAT   | -1,1032801 | 0,072612382 | -15,194104  | 256  |                   |
| P17425     | Hydroxymethylglutaryl-CoA synthase, cytoplasmic (HMG-CoA synthase) (EC 2.3.3.10)                                                                                                                                                                                                                                                                            | Hmgcs1Hmgcs        | HMCS1_RAT  | -1,46S136  | 0,110540937 | -13,254239  | 212  |                   |
| Q01205     | Dihydropolypyllysine-residue succinyltransferase component of 2-oxoglutarate dehydrogenase complex, mitochondrial (EC 2.3.1.61) (E2K)                                                                                                                                                                                                                       | Dlat               | 0D02_RA T  | 1,346927S6 | 0,062837025 | 21,4352534  | 133  |                   |
|            | ADP/ATP translocase 1 (ADP,ATP carrier protein 1) (Adenine nucleotide                                                                                                                                                                                                                                                                                       |                    |            |            |             |             |      |                   |
| Q05962     | translocator 1) (ANT 1) (Solute carrier family 25 member 4)                                                                                                                                                                                                                                                                                                 |                    | ADT1_RAT   | -0,868180S | 0,074579109 | -11,641069  | 87   |                   |
| Q499N5     | Acyl-CoA synthetase family member 2, mitochondrial (EC 6.2.1.-)                                                                                                                                                                                                                                                                                             | Acsf2              | ACSF2_RAT  | -1,0240636 | 0,063991128 | -16,003212  | 224  |                   |
|            | Membrane-associated phosphatidylinositol transfer protein 1                                                                                                                                                                                                                                                                                                 |                    |            |            |             |             |      |                   |
| Q5U2N3     | (Phosphatidylinositol transfer protein, membrane-associated 1) (PITPnm 1) (Pyk2N-terminal domain-interacting receptor 2) (NIR-2)                                                                                                                                                                                                                            | Pitpnm1Nir2Pitpnm  | PITM1_RAT  | -1,1390133 | 0,0741904   | -15,35257   | 58   |                   |
| 035458     | Vesicular inhibitory amino acid transporter (GABA and glycine transporter) (Solute carrier family 32 member 1) (Vesicular GABA transporter) (rGVAT)                                                                                                                                                                                                         | Slc32a1 VgatVlaat  | VIAAT_RAT  | -1,6727S28 | 0,125831851 | -13,293556  | 156  |                   |
| P13383     | Nucleolin (ProteinC23)                                                                                                                                                                                                                                                                                                                                      | Ncl Nuc            | NUCL_RAT   | -1,096616S | 0,078239447 | -14,016159  | 192  |                   |
| Q63692     | Hsp90 co-chaperone Cdc37 (Hsp90 chaperone protein kinase-targeting subunit) (p50Cdc37)                                                                                                                                                                                                                                                                      | Cdc37              | COC37_RA T | 0,84931826 | 0,07230529  | 11,746281   | 246  |                   |
| Q99N27     | Sortiginexin-1                                                                                                                                                                                                                                                                                                                                              | Snx1               | SNX1_RAT   | -1,7030S62 | 0,056556334 | -30,112564  | 88   |                   |
| Q09073     | ADP/ATP translocase 2 (ADP,ATP carrier protein 2) (ANT 2)                                                                                                                                                                                                                                                                                                   | Slc25a5Ant2        | ADT2_RAT   | -0,844889S | 0,069173475 | -12,214068  | 110  |                   |
|            |                                                                                                                                                                                                                                                                                                                                                             |                    |            |            |             |             |      |                   |
|            | Cytochrome b-c1 complex subunit 1, mitochondrial (Complex III subunit 1) (Core protein I) (Ubiquinol-cytochrome-c reductase complex core protein I)                                                                                                                                                                                                         | Uqcrc1             |            |            |             |             |      |                   |
| Q68FY0     |                                                                                                                                                                                                                                                                                                                                                             |                    | QCR1_RAT   | -1,3491084 | 0,135806814 | -9,9340262  | 174  |                   |
| P07895     | Superoxide dismutase [Mn], mitochondrial (EC 1.15.1.1)                                                                                                                                                                                                                                                                                                      | Sod2               | SODM_RAT   | -2,1440308 | 0,104980626 | -20,423109  | 103  |                   |
| P18445     | 60S ribosomal protein L27a                                                                                                                                                                                                                                                                                                                                  | Rpl27a             | RL27A_RAT  | -4,3S98299 | 0,097389886 | -44,766762  | 30   |                   |
|            | Methionine adenosyltransferase 2 subunit beta (Methionine                                                                                                                                                                                                                                                                                                   |                    |            |            |             |             |      |                   |
| Q5U2R0     | adenosyltransferase II beta) (MAT II beta)                                                                                                                                                                                                                                                                                                                  | Mat2b              | MAT2B_RAT  | -3,6477744 | 0,156321179 | -23,335126  | 28   |                   |
| P24268     | Cathepsin D (EC3.4.23.5)                                                                                                                                                                                                                                                                                                                                    | Ctsd               | CATD_RAT   | 0,68347913 | 0,068775236 | 9,93786662  | 145  |                   |
|            | Voltage-dependent anion-selective channel protein 1 (VDAC-1) (rVDAC1)                                                                                                                                                                                                                                                                                       |                    |            |            |             |             |      |                   |
| Q922L0     | (Outer mitochondrial membrane protein porin 1)                                                                                                                                                                                                                                                                                                              | Vdac1              | VDAC1_RAT  | -0,628027S | 0,040551389 | -15,487201  | 191  |                   |
|            | NADH dehydrogenase [ubiquinone] 1 alpha subcomplex subunit 11 (Complex I- B14.7) (CI-B14.7) (NADH-ubiquinone oxidoreductase subunit B14.7)                                                                                                                                                                                                                  | Ndufa11            |            |            |             |             |      |                   |
| Q80W89     |                                                                                                                                                                                                                                                                                                                                                             |                    | NDUAB_RAT  | -0,9288S99 | 0,058117741 | -15,982381  | 65   |                   |
| 035509     | Ras-related protein Rab-11B                                                                                                                                                                                                                                                                                                                                 | Rab11b             | RB11B_RAT  | -0,7638187 | 0,056453291 | -13,5301    | 43   |                   |
| P14841     | Cystatin-C(Cystatin-3)                                                                                                                                                                                                                                                                                                                                      | Cst3               | CYTC_RAT   | 0,8346S6S  | 0,036527762 | 15,9732111  | 43   |                   |
| Q62667     | Major vault protein (MVP)                                                                                                                                                                                                                                                                                                                                   | Msp                | MVP_RAT    | 0,546498S  | 0,058925174 | 9,27444871  | 152  | 2,22E-16 3,48E-15 |
|            |                                                                                                                                                                                                                                                                                                                                                             |                    |            |            |             |             |      |                   |
| P29266     | 3-hydroxyisobutyrate dehydrogenase, mitochondrial (HIBADH) (EC 1.1.1.31)                                                                                                                                                                                                                                                                                    | Hibadh             | 3HIDH_RAT  | -1,242493  | 0,13406841  | -9,2676048  | 142  | 4,44E-16 6,61E-15 |
| Q4KMA2     | UV excision repair protein RAD23 homolog B                                                                                                                                                                                                                                                                                                                  | Rad23b             | RD23B_RAT  | 1,731S53S7 | 0,158908155 | 10,8965683  | 63   | 4,44E-16 6,61E-15 |
|            | Kynurenine-oxoglutarate transaminase 3 (EC 2.6.1.7) (Cysteine-S-conjugate beta-lyase 2) (EC 4.4.1.13) (KATIII) (Kynurenine-glyoxylate transaminase) (EC 2.6.1.63)                                                                                                                                                                                           | Cbcl2Kat3          | KAT3_RAT   | -7,4696132 | 0,01035854  | -721,10679  |      | 4,44E-16 6,61E-15 |
| Q58FK9     |                                                                                                                                                                                                                                                                                                                                                             |                    |            |            |             |             |      |                   |
|            | N-terminal EF-hand calcium-binding protein 1 (EF-hand calcium-binding protein 1) (Neuronal calcium-binding protein 1) (Synaptotagmin-interacting protein 1) (Stip-1)                                                                                                                                                                                        | Necab1 Efcyb1 Stip | NECA1_RAT  | 4,872901S7 | 0,068260497 | 71,3868459  | 11   | 4,44E-16 6,61E-15 |
| Q9ESB5     |                                                                                                                                                                                                                                                                                                                                                             |                    |            |            |             |             |      |                   |
|            |                                                                                                                                                                                                                                                                                                                                                             |                    |            |            |             |             |      |                   |
|            | Glutamate decarboxylase 1 (EC 4.1.1.15) (67 kDa glutamic acid decarboxylase) (GAD-67) (Glutamate decarboxylase 67 kDa isoform)                                                                                                                                                                                                                              | Gad1 Gad67         | DCE1_RAT   | -1,6270022 | 0,168265692 | -9,669245   | 101  | 4,44E-16 6,61E-15 |
| P18088     |                                                                                                                                                                                                                                                                                                                                                             |                    |            |            |             |             |      |                   |
| Q5B1J7     | Colled-coil domain-containing protein 93                                                                                                                                                                                                                                                                                                                    | Ccdc93             | CCD93_RAT  | -3,6337384 | 0,194796264 | -18,654045  | 24   | 8,88E-16 1,31E-14 |
| Q6P7A9     | Lysosomal alpha-glucosidase (EC 3.2.1.20) (Acid maltase)                                                                                                                                                                                                                                                                                                    | Gaa                | LYAG_RAT   | 1,87811S6  | 0,158141485 | 11,8761728  | 45   | 1,78E-15 2,59E-14 |
|            | Enoyl-CoA delta isomerase 2, mitochondrial (EC 5.3.3.8) (Delta(3)-delta(2)- enoyl-CoA isomerase) (D3,D2-enoil-CoA isomerase) (Dodecenoyl-CoA isomerase) (Peroxisomal 3,2-trans-enoil-CoA isomerase) (pECI)                                                                                                                                                  | Eci2Peci           | ECI2_RAT   | -3,34188S2 | 0,092471561 | -36,1396    | 14   | 3,11E-15 4,44E-14 |
| Q5XIC0     |                                                                                                                                                                                                                                                                                                                                                             |                    |            |            |             |             |      |                   |
| Q5U2P0     | DIS3-like exonuclease 1 (EC 3.1.13.-)                                                                                                                                                                                                                                                                                                                       | Dis3l              | DISL1_RAT  | -1,31073S1 | 0,045417834 | -26,859481  | 16   | 3,11E-15 4,44E-14 |
|            | AP-2 complex subunit alpha-2 (100 kDa coated vesicle protein C) (Adaptor protein complex AP-2 subunit alpha-2) (Adaptor-related protein complex 2 subunit alpha-2) (Alpha-adaptin C) (Alpha2-adaptin) (Clathrin assembly protein complex 2 alpha-C large chain ) (Plasma membrane adaptor HAZ/AP2 adaptin alpha Csubunit)                                   | Ap2a2Adtab         | AP2A2_RA T | -0,7083282 | 0,085977237 | -8,2385547  | 327  | 4,22E-15 5,97E-14 |
| P18484     |                                                                                                                                                                                                                                                                                                                                                             |                    |            |            |             |             |      |                   |
| Q8R491     | EH domain-containing protein 3                                                                                                                                                                                                                                                                                                                              | Ehd3Ehd2           | EHD3_RAT   | -1,8549946 | 0,176972901 | -10,4818    | 59   | 4,44E-15 6,22E-14 |
| P37805     | Transgelin-3 (Neuronal protein 22) (NP22) (Neuronal protein NP25)                                                                                                                                                                                                                                                                                           | Tagln3Np25         | TAGL3_RAT  | -1,6S38184 | 0,182636999 | -9,0552208  | 112  | 4,88E-15 6,78E-14 |
|            | Peripheral plasma membrane protein CASK (EC 2.7.11.1) (Calcium/calmodulin-dependent serine protein kinase)                                                                                                                                                                                                                                                  | Cask               | CSKP_RAT   | -3,3948217 | 0,123993685 | -27,378989  | 16   | 7,11E-15 9,76E-14 |
| Q62915     |                                                                                                                                                                                                                                                                                                                                                             |                    |            |            |             |             |      |                   |
|            | Mitochondrial 2-oxoglutarate/malate carrier protein (OGCP) (Solute carrier                                                                                                                                                                                                                                                                                  | Slc25a11 Slc20a4   |            |            |             |             |      |                   |
|            |                                                                                                                                                                                                                                                                                                                                                             |                    |            |            |             |             |      |                   |
|            | family 25 member 11)                                                                                                                                                                                                                                                                                                                                        |                    | M20M_ RA T | -8,8174964 | 0,065313001 | -135,00369  |      | 1,02E-14 1,39E-13 |
| P97700     |                                                                                                                                                                                                                                                                                                                                                             |                    |            |            |             |             |      |                   |
|            | Aconitate hydratase, mitochondrial (Aconitase) (EC 4.2.1.3) (Citrate hydro-lyase)                                                                                                                                                                                                                                                                           | Aco2               | ACON_RAT   | -0,S239227 | 0,067711069 | -7,817373   | 815  | 1,67E-14 2,25E-13 |
| Q9ER34     |                                                                                                                                                                                                                                                                                                                                                             |                    |            |            |             |             |      |                   |
| P10719     | ATP synthase subunit beta, mitochondrial (EC 3.6.3.14)                                                                                                                                                                                                                                                                                                      | Atp5b              | ATPB_RAT   | -0,7034667 | 0,090755803 | -7,7512038  | 824  | 2,66E-14 3,56E-13 |
|            | Microtubule-associated protein 1B (MAP-1B) (Neuraxin) (Cleaved into:                                                                                                                                                                                                                                                                                        |                    |            |            |             |             |      |                   |
| P15205     | MAP1B heavy chain; MAP1 light chain LC1)                                                                                                                                                                                                                                                                                                                    | Map1b              | MAP1B_RAT  | -0,2S61448 | 0,033348287 | -7,6808991  | 1309 | 3,06E-14 4,05E-13 |
| P62832     |                                                                                                                                                                                                                                                                                                                                                             |                    |            |            |             |             |      |                   |
| P85125     | 60S ribosomal protein L23                                                                                                                                                                                                                                                                                                                                   | Rpl23              | RL23_RAT   | -1,2206837 | 0,048920532 | -24,95238   | 16   | 3,09E-14 4,05E-13 |
|            | Polymerase I and transcript release factor (Cavin-1) (cav-p60)                                                                                                                                                                                                                                                                                              | Ptrf               | PTRF_RAT   | -1,0026427 | 0,040282974 | -24,889987  | 16   | 3,20E-14 4,16E-13 |
|            | Succinate dehydrogenase [ubiquinone] flavoprotein subunit, mitochondrial                                                                                                                                                                                                                                                                                    |                    |            |            |             |             |      |                   |
|            |                                                                                                                                                                                                                                                                                                                                                             |                    |            |            |             |             |      |                   |
| CON_007044 | (EC 1.3.5.1) (Flavoprotein subunit of complex II) (Fp)                                                                                                                                                                                                                                                                                                      | Sdha               | SDHA_RAT   | 0,S9921808 | 0,047399765 | 12,6417943  | 32   | 5,48E-14 7,07E-13 |
| Q920L2     |                                                                                                                                                                                                                                                                                                                                                             |                    |            |            |             |             |      |                   |
|            | 2',3'-cyclic-nucleotide 3'-phosphodiesterase (CNP) (CNPase) (EC 3.1.4.37)                                                                                                                                                                                                                                                                                   | CnpCnp1            | CN37_RA T  | -1,2033831 | 0,14609419  | -8,2370363  | 154  | 7,11E-14 9,07E-13 |
| P13233     | NADH dehydrogenase [ubiquinone] flavoprotein 2, mitochondrial (EC 1.6.5.3) (EC 1.6.99.3) (NADH-ubiquinone oxidoreductase 24 kDa subunit)                                                                                                                                                                                                                    | Ndufv2             | NDUV2_RAT  | -0,S003202 | 0,065472735 | -7,6416567  | 559  | 9,37E-14 1,19E-12 |
| P19234     | Branched-chain-amino-acid aminotransferase, mitochondrial (BCAT(m)) (EC 2.6.1.42)                                                                                                                                                                                                                                                                           | Bcat2 Bcatm Eca40  | BCAT2_RAT  | -0,4S69204 | 0,047213383 | -9,6777725  | 56   | 1,48E-13 1,86E-12 |
|            |                                                                                                                                                                                                                                                                                                                                                             |                    |            |            |             |             |      |                   |
|            | 4- aminobutyrate aminotransferase, mitochondrial (EC 2.6.1.19) ((S)-3-amino-2-methylpropionate transaminase) (EC 2.6.1.22) (GABA aminotransferase) (GABA-AT) (Gamma-amino-N-butyrate transaminase) (GABA transaminase) (GABA-T) (L-AIBAT) (Cleaved into : 4-aminobutyrate aminotransferase, brain isoform; 4-aminobutyrate aminotransferase, liver isoform) | AbatGabat          | GABT_RAT   | -6,2204674 | 0,146889141 | -42,348041  | 11   | 1,55E-13 1,93E-12 |
| 035854     |                                                                                                                                                                                                                                                                                                                                                             |                    |            |            |             |             |      |                   |
|            | Syntaxin-binding protein 1 (N-Sec1) (Protein unc-18 homolog 1) (Unc18-1)                                                                                                                                                                                                                                                                                    | Stxbp1 Unc18a      |            |            |             |             |      |                   |
|            |                                                                                                                                                                                                                                                                                                                                                             |                    |            |            |             |             |      |                   |
|            | (P-protein unc-18 homolog A) (UNC-18A) (p67) (rDSEC1)                                                                                                                                                                                                                                                                                                       |                    | S1XB1_RA I | -0,9173331 | 0,126400602 | -7,17332412 | 289  | 1,80E-13 2,22E-12 |
| P16785-2   | Macrophage-capping protein (Actin regulatory protein CAP-G)                                                                                                                                                                                                                                                                                                 | Capg               | CAPG_RAT   | -1,90S1981 | 0,208272802 | -9,1476089  | 66   | 2,38E-13 2,91E-12 |
|            |                                                                                                                                                                                                                                                                                                                                                             |                    |            |            |             |             |      |                   |
|            | Monoglyceride lipase (MGL) (EC 3.1.1.23 ) (Monoacylglycerol lipase) (MAGL)                                                                                                                                                                                                                                                                                  | Mgl1Mgl2           | MG LL_RAT  | -0,S879888 | 0,069674521 | -8,4390796  | 101  | 2,40E-13 2,91E-12 |
| Q6AYC4     |                                                                                                                                                                                                                                                                                                                                                             |                    |            |            |             |             |      |                   |
| Q8R431     | 60S ribosomal protein L18                                                                                                                                                                                                                                                                                                                                   | Rpl18              | RL18_RAT   | -6,4422294 | 0,074843897 | -86,075547  |      | 3,70E-13 4,45E-12 |
| P12001     | ATP synthase subunit f, mitochondrial                                                                                                                                                                                                                                                                                                                       | Atp5f2             | ATPB_RAT   | -0,48S1S17 | 0,056624127 | -8,5679321  | 82   | 5,21E-13 6,21E-12 |
|            | Serine/threonine-protein phosphatase 28 catalytic subunit alpha isoform (EC 3.1.3.16) (CAM-PRP catalytic subunit) (Calmodulin-dependent calcineurin A subunit alpha isoform)                                                                                                                                                                                | Ppp3ca Calna       | PP2BA_RAT  | -1,6630871 | 0,074740911 | -22,251363  | 15   | 6,69E-13 7,92E-12 |
| D3ZAF6     |                                                                                                                                                                                                                                                                                                                                                             |                    |            |            |             |             |      |                   |
| P63329     | 40S ribosomal protein S30                                                                                                                                                                                                                                                                                                                                   |                    | RS30_RAT   | 7,73927007 | 0,065281009 | 118,553163  |      | 8,01E-13 9,40E-12 |
|            | Sodium/potassium-transporting ATPase subunit alpha-2 (Na <sup>+</sup> /K <sup>+</sup> ) ATPase alpha-2 subunit) (EC 3.6.3.9) (Na <sup>+</sup> /K <sup>+</sup> ) ATPase alpha <sup>+</sup> ) subunit) (Sodium pumpsubunitalpha-2)                                                                                                                            | Atp1a2             | AT1A2_RAT  | -0,8143989 | 0,043304189 | -18,80647   | 16   | 2,47E-12 2,87E-11 |
| P62864     |                                                                                                                                                                                                                                                                                                                                                             |                    |            |            |             |             |      |                   |
| P06886     | Tetraspanin-2 (Tspan-2)                                                                                                                                                                                                                                                                                                                                     | Tspan2             | TSN2_RAT   | -0,54SSS9  | 0,076635751 | -7,1188572  | 771  | 2,49E-12 2,88E-11 |
|            |                                                                                                                                                                                                                                                                                                                                                             |                    |            |            |             |             |      |                   |
|            | 2,4-dienoyl-CoA reductase, mitochondrial (EC 1.3.1.34) (2,4-dienoyl-CoA reductase [NADPH]) (4-enoyl-CoA reductase (NADPH))                                                                                                                                                                                                                                  | Decr1 Deer         | DECR_RAT   | -3,S009969 | 0,128781438 | -27,185571  | 12   | 3,78E-12 4,33E-11 |
| Q9JJW1     |                                                                                                                                                                                                                                                                                                                                                             |                    |            |            |             |             |      |                   |
|            | Cytochrome b-c1 complex subunit 8 (Complex III subunit 8) (Complex III subunit VIII) (Low molecular mass ubiquinone-binding protein) (Ubiquinol-cytochrome c reductase complex 9.5 kDa protein) (Ubiquinol-cytochrome c reductase complex ubiquinone-binding protein QP-C)                                                                                  | Uqcrc Qpc          | QCR8_RAT   | -6,148706S | 0,096157582 | -63,944063  |      | 3,98E-12 4,52E-11 |
| Q64591     |                                                                                                                                                                                                                                                                                                                                                             |                    |            |            |             |             |      |                   |
|            | Alpha-1-antiprotease (Alpha-1-antitrypsin) (Alpha-1-proteinase inhibitor) (Serpina1)                                                                                                                                                                                                                                                                        | Serpina1           | AI AT_RAT  | -7,674969S | 0,163640945 | -46,901278  |      | 4,56E-12 5,14E-11 |
| Q77Q16     |                                                                                                                                                                                                                                                                                                                                                             |                    |            |            |             |             |      |                   |
|            | Cytochrome c oxidase subunit 4 isoform 1, mitochondrial (Cytochrome c                                                                                                                                                                                                                                                                                       |                    | COX41_RAT  | 0,54130201 | 0,070327327 | 7,69689447  | 109  | 6,73E-12 7,53E-11 |
| P17475     |                                                                                                                                                                                                                                                                                                                                                             |                    |            |            |             |             |      |                   |
|            |                                                                                                                                                                                                                                                                                                                                                             |                    |            |            |             |             |      |                   |
|            |                                                                                                                                                                                                                                                                                                                                                             |                    | QCR6_RAT   | -0,S7S26   | 0,076214726 | -7,5478856  | 122  | 8,86E-12 9,84E-11 |

|         |                                                                                         |                   |
|---------|-----------------------------------------------------------------------------------------|-------------------|
| oxidase | se polypeptide IV) (Cytochrome c oxidase subunit IV isoform 1) (COX IV-1)               | Cox4i1 Cox4 Cox4a |
|         | Cytochrome b-c1 complex subunit 6, mitochondrial (Complex III subunit 6)                |                   |
|         | (Complex III subunit VIII) (Cytochrome c1 non-heme 11 kDa protein)                      |                   |
|         | (Mitochondrial hinge protein) (Ubiquinol-cytochrome c reductase complex 11 kDa protein) | Uqcrlh            |
| P10888  | Hippocalcin-like protein 1 (Neural visinin-like protein 3) (NVL-3) (NVP-3)              |                   |
| Q5M9I5  | (Visinin-like protein 3) (VILIP-3)                                                      | Hpcal1            |
| P62749  | Mitochondrial-processing peptidase subunit beta (EC 3.4.24.64) (Beta-MPP) (P-52)        | PmpcbMppb         |

|            |                                                                                                                                                                                                                                                                                                                                                                                                  |                      |             |            |             |            |          |          |          |
|------------|--------------------------------------------------------------------------------------------------------------------------------------------------------------------------------------------------------------------------------------------------------------------------------------------------------------------------------------------------------------------------------------------------|----------------------|-------------|------------|-------------|------------|----------|----------|----------|
| Q03346     | Seel family domain-containing protein 1 (SLY1 homolog) (Slyp) (Syntaxin-binding protein 1-like 2) (Vesicle transport-related protein Ra410)                                                                                                                                                                                                                                                      | Scfdl Ra410 Styl     | SCFDL_RAT   | -6,0308487 | 0,232954419 | -25,888535 | 11       | 3,30E-11 | 3,58E-10 |
| Q62991     | Pyridoxal phosphate phosphatase (PLP phosphatase) (EC 3.1.3.3) (EC 3.1.3.74) (Chronophin) (Reg I-binding protein 1)                                                                                                                                                                                                                                                                              | PdpxCin Pip Pipp     | PLPP_RAT    | -3,3747946 | 0,133301782 | -25,316951 | 11       | 4,21E-11 | 4,53E-10 |
| Q8VD52     | Legumain (EC 3.4.22.34) (Asparaginyl endopeptidase) (Protease, cysteine 1)                                                                                                                                                                                                                                                                                                                       | Lgmn Prscl           | LGMN_RAT    | 0,68954923 | 0,098049601 | 7,03265718 | 173      | 4,51E-11 | 4,82E-10 |
| Q9RQJ8     | Maleylacetoacetate isomerase (MAAI) (EC 5.2.1.2) (GSTZ1-) (Glutathione S-transferase zeta I) (EC2.5.1.18)                                                                                                                                                                                                                                                                                        | Gstzi                | MAAI_RAT    | 0,98961054 | 0,061181241 | 16,1750648 | 15       | 6,66E-11 | 7,07E-10 |
|            | Carbonic anhydrase 1 (EC 4.2.1.1) (Carbonate dehydratase I) (Carbonic                                                                                                                                                                                                                                                                                                                            |                      |             |            |             |            |          |          |          |
| P57113     | anhydrase I) (CA-I)                                                                                                                                                                                                                                                                                                                                                                              | Cal Carl             | CAHI_RAT    | -0,9748932 | 0,056031499 | -17,39902  | 14       | 7,04E-11 | 7,42E-10 |
| BOBNN3     | Diphosphomevalonate decarboxylase (EC 4.1.1.33) (Mevalonate (diphospho)decarboxylase) (MDDase) (Mevalonate pyrophosphate decarboxylase)                                                                                                                                                                                                                                                          | MvdMpd               | MVDI_RAT    | 0,6252686  | 0,084712849 | 7,38103616 | 89       | 7,93E-11 | 8,30E-10 |
| Q62967     | Trifunctional enzyme subunit alpha, mitochondrial (TP-alpha) (Includes: Long-chain enoyl-CoA hydratase (EC 4.2.1.17); Long chain 3-hydroxyacyl-CoA dehydrogenase (EC 1.1.1.211))                                                                                                                                                                                                                 | Hadha                | ECHA_RAT    | 0,39284255 | 0,042414915 | 9,26189626 | 34       | 8,00E-11 | 8,31E-10 |
| Q64428     | Redox-regulatory protein FAM213A (Peroxiredoxin-like 2 activated in M-CSF stimulated monocytes) (Protein PAMMI) (Sperm head protein 1)                                                                                                                                                                                                                                                           | 213a PammShp I       | F213A_RAT   | -0,6102212 | 0,087897281 | -6,9424357 | 163      | 8,68E-11 | 8,95E-10 |
| Q6AXX6     | Heat shock protein HSP 90-beta (Heat shock 84 kDa) (HSP84)                                                                                                                                                                                                                                                                                                                                       | Hsp90abl Hsp84       | HS90B_RA T  | -0,2853735 | 0,032507804 | -8,7786156 | 39       | 8,94E-11 | 9,15E-10 |
| P34058     | Branched-chain-amino-acid aminotransferase, cytosolic (BCAT(c)) (EC 2.6.1.42)                                                                                                                                                                                                                                                                                                                    | Bcatl                | BCATI_RAT   | -0,3904599 | 0,059108236 | -6,6058457 | 558      | 9,23E-11 | 9,38E-10 |
| P54690     | Annexin A3 (35-alpha calcimedin) (Annexin III) (Upocortin III) (Placental anticoagulant protein III) (PAPI-II)                                                                                                                                                                                                                                                                                   | Anxa3Anx3            | ANXA3_RA T  | -0,5800469 | 0,086657659 | -6,6935445 | 295      | 1,10E-10 | 1,11E-09 |
| P14669     | Aspartate aminotransferase, mitochondrial (mAspAT) (EC 2.6.1.1) (EC 2.6.1.7) (Fatty acid-binding protein) (FABP-1) (Glutamate oxaloacetate transaminase 2) (Kynurenine aminotransferase 4) (Kynurenine aminotransferase IV) (Kynurenine-oxoglutarate transaminase 4) (Kynurenine-oxoglutarate transaminase IV) (Plasma membrane-associated fatty acid-binding protein) (FABPpm) (Transaminase A) | Got2Maat             |             |            |             |            |          |          |          |
| P00507     | Prohibitin                                                                                                                                                                                                                                                                                                                                                                                       | Phb                  | AATM_RAT    | 0,447792   | 0,067821955 | 6,60246372 | 446      | 1,15E-10 | 1,15E-09 |
| P67779     | Tropomodulin-1 (Erythrocyte tropomodulin) (E-Tmod)                                                                                                                                                                                                                                                                                                                                               | Tmodl Tmod           | PHB_RAT     | -0,4586467 | 0,069620077 | -6,5878505 | 402      | 1,40E-10 | 1,39E-09 |
| P70567     | Synapsin-2 (Synapsin II)                                                                                                                                                                                                                                                                                                                                                                         | Syn2                 | TMODI_RAT   | -0,4637257 | 0,059938418 | -7,7367026 | 57       | 1,88E-10 | 1,86E-09 |
| Q63537     | 60S ribosomal protein L4 (60S ribosomal protein L1)                                                                                                                                                                                                                                                                                                                                              | Rpl4 Rpll            | SYN2_RAT    | -7,3010674 | 0,187728988 | -38,891529 | 2,10E-10 | 2,06E-09 |          |
| P50878     |                                                                                                                                                                                                                                                                                                                                                                                                  |                      | R4_RA T     | -7,4958207 | 0,194381212 | -38,562475 | 2,25E-10 | 2,19E-09 |          |
| Q9VVV1     | Ubiquitin carboxyl-terminal hydrolase 7 (EC 3.4.19.12) (Deubiquitinating enzyme 7) (Herpesvirus-associated ubiquitin-specific protease) (HAUSP) (Ubiquitin thioesterase 7) (Ubiquitin-specific processing protease 7) NAO-dependent protein deacylase sirtuin-5, mitochondrial (EC 3.5.1.-)                                                                                                      | Timm8a Ddcl1 Tim8a   | USP7_RAT    | -0,8342171 | 0,082002017 | -7,734165  | 55       | 2,37E-10 | 2,29E-09 |
| Q4VSI4     | (Regulatory protein SIR2 homolog 5) (SIR2-like protein 5)                                                                                                                                                                                                                                                                                                                                        | Sirt5                | SIR5_RAT    | 1,96309335 | 0,248780096 | 7,89087783 | 49       | 2,81E-10 | 2,68E-09 |
| Q68FX9     | Proteasome activator complex subunit 1 (IS-regulator complex subunit alpha) (REG-alpha) (Activator of multicatalytic protease subunit 1) (Proteasome activator 28 subunit alpha) (PA28a) (PA28alpha)                                                                                                                                                                                             | Psmel                | PSMEI_RA T  | -2,3676545 | 0,275511702 | -8,5936622 | 36       | 3,02E-10 | 2,87E-09 |
| Q63797     | Annexin A6 (Annexin VI) (Annexin-6) (Calcium-binding protein 65/67) (CBP 65/67)                                                                                                                                                                                                                                                                                                                  | Anxa6Anx6            | ANXA6_RA T  | 0,556117   | 0,083599722 | 6,65213935 | 168      | 3,89E-10 | 3,67E-09 |
| P48037     | Coatomer subunit gamma-1 (Gamma-1-coat protein) (Gamma-1-COP)                                                                                                                                                                                                                                                                                                                                    | Copgl Copg           | COPGI_RAT   | -0,3179898 | 0,050321967 | -6,3191056 | 680      | 4,76E-10 | 4,46E-09 |
| Q4AEF8     | Calretinin (CR)                                                                                                                                                                                                                                                                                                                                                                                  | Calb2                | CALB2_RAT   | -1,05198   | 0,133615262 | -7,8732027 | 41       | 9,92E-10 | 9,24E-09 |
|            | V-type proton ATPase subunit E 1 (V-ATPase subunit E 1) (Vacuolar proton                                                                                                                                                                                                                                                                                                                         |                      |             |            |             |            |          |          |          |
| P47728     | pumps subunit E 1)                                                                                                                                                                                                                                                                                                                                                                               | Atp6v1el             | VATEI_RAT   | -0,4939495 | 0,079531528 | -6,2107387 | 480      | 1,14E-09 | 1,06E-08 |
| Q6PCU2     | ATP synthase F(0) complex subunit B1, mitochondrial (ATP synthase subunit b) (ATPase subunit b)                                                                                                                                                                                                                                                                                                  | Atp5f1Atp5f          | AT5FI_RAT   | -0,4407879 | 0,070470076 | -6,254966  | 305      | 1,34E-09 | 1,23E-08 |
| P19511     | Calcydin-binding protein (CacyBP)                                                                                                                                                                                                                                                                                                                                                                | Cacybp               | CYBP_RAT    | -0,8087168 | 0,104707005 | -7,723617  | 42       | 1,37E-09 | 1,25E-08 |
| Q6AYK6     | 40S ribosomal protein S9                                                                                                                                                                                                                                                                                                                                                                         | Rps9                 | RS9_RAT     | 0,36931402 | 0,05707646  | 6,47051384 | 123      | 2,09E-09 | 1,89E-08 |
| P29314     | Neurotrimin (GP65)                                                                                                                                                                                                                                                                                                                                                                               | Ntrn HntNt           | NTR1_RAT    | -0,6142256 | 0,092234613 | -6,6593826 | 86       | 2,47E-09 | 2,23E-08 |
| Q62718     | Protein disulfide-isomerase A3 (EC 5.3.4.1) (58 kDa glucose-regulated protein) (58 kDa microsomal protein) (p58) (Disulfide isomerase ER-60) (Endoplasmic reticulum resident protein 57) (ER protein 57) (ERp57) (Endoplasmic reticulum resident protein 60) (ER protein 60) (ERp60) (HIP-70) (Q-2)                                                                                              | Pdia3 Erp60 Grp58    | PDIA3_RA T  | -0,4237018 | 0,035994185 | -11,771396 | 16       | 2,72E-09 | 2,44E-08 |
| P11598     | Glycine cleavage system H protein, mitochondrial (Uipoic add-containing protein)                                                                                                                                                                                                                                                                                                                 | Gcsh                 | GCSH_RA T   | 0,35858871 | 0,059979634 | 5,97850791 | 378      | 5,22E-09 | 4,65E-08 |
| Q5I0P2     | 60S ribosomal protein L 12                                                                                                                                                                                                                                                                                                                                                                       | Rpl12                | RI 12_RA T  | -3,1529802 | 0,424784518 | -7,4225402 | 39       | 5,67E-09 | 5,02E-08 |
| P23358     | Tubulin beta-3 chain (Neuron-specific class III beta-tubulin)                                                                                                                                                                                                                                                                                                                                    | Tubb3                | TBB3_RAT    | -0,4972352 | 0,080128809 | -6,2054487 | 125      | 7,36E-09 | 6,48E-08 |
| Q4QRB4     | Tubulin alpha-4A chain (Alpha-tubulin 4) (Tubulin alpha-4 chain)                                                                                                                                                                                                                                                                                                                                 | Tuba4a Tuba4         | TBA4A_RA T  | -0,9484418 | 0,157494931 | -6,0220464 | 214      | 7,41E-09 | 6,48E-08 |
|            | Gamma-enolase (EC 4.2.1.11) (2-phospho-D-glycerate hydro-lyase) (Enolase                                                                                                                                                                                                                                                                                                                         | Eno2 Eno-2           |             |            |             |            |          |          |          |
| Q5XIF6     | 2) (Neural enolase) (Neuron-specific enolase) (NSE)                                                                                                                                                                                                                                                                                                                                              |                      | ENOG_RAT    | -0,5336046 | 0,083897805 | -6,3601736 | 88       | 8,75E-09 | 7,61E-08 |
| P07323     | Proteasome subunit beta type-10 (EC 3.4.25.1) (Low molecular mass protein 10) (Macropain subunit MECl-1) (Multicatalytic endopeptidase complex subunit MECl-1) (Proteasome MECl-1) (Proteasome subunit beta-2)                                                                                                                                                                                   | PsmblO LmpIO Mecil   | PSBI_O_RA T | -0,5637037 | 0,096320266 | -5,852389  | 487      | 8,91E-09 | 7,70E-08 |
| Q4KM35     | ATP-binding cassette sub-family A member 2 (ATP-binding cassette transporter 2) (ATP-binding cassette 2)                                                                                                                                                                                                                                                                                         | Abca2Abc2            | ABCA2_RA T  | 0,82256912 | 0,060926764 | 13,5009489 | 12       | 1,29E-08 | 1,11E-07 |
| Q9ESR9     | Thymosin beta-10                                                                                                                                                                                                                                                                                                                                                                                 | ThybIO               | TYBIO_RAT   | 0,70925608 | 0,023997958 | 29,5548509 | 1,31E-08 | 1,12E-07 |          |
| P63312     | Cytochrome b-c1 complex subunit Rieske, mitochondrial (EC 1.10.2.2) (Complex III subunit 5) (Cytochrome b-c1 complex subunit 5) (Liver regeneration-related protein LRRGT00195) (Rieske iron-sulfur protein) (RISP)                                                                                                                                                                              |                      |             |            |             |            |          |          |          |
| CON_002203 | (Ubiquinol-cytochrome c reductase iron-sulfur subunit) (Cleared into: Cytochrome b-c1 complex subunit 11 (Complex III subunit IX) (Ubiquinol-cytochrome c reductase 8 kDa protein))                                                                                                                                                                                                              | Uqcrrfsl             | UCRI_RA T   | 0,76983535 | 0,110539687 | 6,96433444 | 43       | 1,45E-08 | 1,23E-07 |
| P20788     | Sideroflexin-5 (Tricarboxylate carrier BBG-TCC)                                                                                                                                                                                                                                                                                                                                                  | Sfxn5                | SFXN5_RAT   | -1,0104532 | 0,07572222  | -13,34421  | 12       | 1,47E-08 | 1,24E-07 |
| Q8CFDO     | Cysteine and glycine-rich protein 1 (Cysteine-rich protein 1) (CRP) (CRPI)                                                                                                                                                                                                                                                                                                                       | CsrplCsrp            | CSRPI_RAT   | -0,6602071 | 0,085426847 | -7,7283329 | 29       | 1,60E-08 | 1,34E-07 |
| P47875     | 40S ribosomal protein S19                                                                                                                                                                                                                                                                                                                                                                        | Rps19                | RS19_RAT    | -0,5918491 | 0,076602254 | -7,7262625 | 28       | 2,04E-08 | 1,70E-07 |
| P17074     | Neurocan core protein (245 kDa early postnatal core glycoprotein) (Chondroitin sulfate proteoglycan 3) [Cleared into : 150 kDa adult core glycoprotein]                                                                                                                                                                                                                                          | Ncan Cspg3           | NCAN_RAT    | -1,2409175 | 0,208619161 | -5,9482434 | 117      | 2,88E-08 | 2,39E-07 |
|            | NADH-ubiquinone oxidoreductase 75 kDa subunit, mitochondrial (EC 1.6.5.3) (EC 1.6.9.3)                                                                                                                                                                                                                                                                                                           | Ndufsl               |             |            |             |            |          |          |          |
| P55067     |                                                                                                                                                                                                                                                                                                                                                                                                  |                      | NBUSI_RAT   | -0,4646868 | 0,076891039 | -6,0434449 | 88       | 3,55E-08 | 2,93E-07 |
| Q66HF1     | 40S ribosomal protein SA (37 kDa laminin receptor precursor) (37LRP) (37/67 kDa laminin receptor) (LRP/LR) (67 kDa laminin receptor) (67LR) (Laminin receptor 1) (LamR) (laminin-binding protein precursor p40) (LBP/p40)                                                                                                                                                                        | Rpsa Lamrl           | RSSA_RAT    | -0,2851664 | 0,049049275 | -5,8138762 | 144      | 3,78E-08 | 3,10E-07 |
| P38983     | 3'(2'),5'-bisphosphate nucleotidase 1 (EC 3.1.3.7) (Bisphosphate 3'-nucleotidase 1) (PAP-inositol 1,4-phosphatase) (PIP) (scHAL2 analogous 3) Alpha-2-HS-glycoprotein (59 kDa bone sialic acid-containing protein) (BSP) (Fetuin-A) (Glycoprotein PP63)                                                                                                                                          | Bpnt1Sal3            | BPNTI_RAT   | -0,3815751 | 0,066943012 | -5,6999988 | 182      | 4,76E-08 | 3,88E-07 |
|            | NADH dehydrogenase [ubiquinone] 1 alpha subcomplex subunit 10, mitochondrial (Complex I-42kD) (CI-42kD) (NADH-ubiquinone oxidoreductase 42 kDa subunit)                                                                                                                                                                                                                                          | AhsgFetua            | FETUA_RAT   | -0,2614391 | 0,043628078 | -5,9924511 | 85       | 4,83E-08 | 3,92E-07 |
| Q9ZIN4     |                                                                                                                                                                                                                                                                                                                                                                                                  | Ndufa1O              | NDUAA_RAT   | -0,5554462 | 0,095085188 | -5,8415637 | 113      | 5,07E-08 | 4,09E-07 |
| P24090     | Proenkephalin-A [Cleared into: Synenkephalin; Met-enkephalin (Opioid growth factor) (OGF); PENK(114-133); PENK(143-185); Met-enkephalin-Arg-Gly-Leu; Leu-enkephalin; PENK(239-260); Met-enkephalin-Arg-Phe] V-type proton ATPase subunit B, brain isoform (V-ATPase subunit B 2) (Endomembrane proton pump 58 kDa subunit) (Vacuolar proton pump subunit B 2)                                    | Penk Penk-rs Penkl   | PENK_RAT    | 0,5542585  | 0,091644161 | 6,04794119 | 75       | 5,31E-08 | 4,25E-07 |
| Q56ISO     |                                                                                                                                                                                                                                                                                                                                                                                                  | Atp6v1b2 Atp6b2 Vat2 | VATB2_RAT   | -0,8127996 | 0,137794748 | -5,8986252 | 91       | 6,18E-08 | 4,92E-07 |
| P04094     | Pantothenate kinase 4 (Pank4) (EC 2.7.1.33) (Pantothenic acid kinase 4)                                                                                                                                                                                                                                                                                                                          | Pank4Fangl           | PANK4_RA T  | -1,393301  | 0,110712139 | -12,584898 | 11       | 7,12E-08 | 5,65E-07 |
| P62815     | Bleomycin hydrolase (Bh) (BLM hydrolase) (BLMH) (EC 3.4.22.40)                                                                                                                                                                                                                                                                                                                                   | Blmh                 | BLMH_RAT    | -0,4343572 | 0,079947103 | -5,4330568 | 639      | 7,88E-08 | 6,18E-07 |
| Q923S8     | Beta-2-microglobulin                                                                                                                                                                                                                                                                                                                                                                             | B2m                  | B2MG_RAT    | 0,76885104 | 0,099582958 | 7,72070903 | 23       | 7,85E-08 | 6,18E-07 |
| P70645     | Annexin A8 (Annexin VIII) (Annexin-8)                                                                                                                                                                                                                                                                                                                                                            | Anxa8                | ANXA8_RA T  | -4,0064875 | 0,517621989 | -7,7401803 | 22       | 1,02E-07 | 7,93E-07 |
|            | Allograft inflammatory factor 1 (AIF-1) (Ionized calcium-binding adapter                                                                                                                                                                                                                                                                                                                         |                      |             |            |             |            |          |          |          |



|          |          |                                                                                                                 |               |           |            |             |            |     |          |          |
|----------|----------|-----------------------------------------------------------------------------------------------------------------|---------------|-----------|------------|-------------|------------|-----|----------|----------|
| 280Z29   | 5,40E-05 | hydrolase domain-containing protein 1)                                                                          |               | FAHDI_RAT | 0,4274487S | 0,063295364 | 6,75323959 | 14  | 9,27E-06 | 5,60E-05 |
| Q8AF98   |          | Elongation factor Tu, mitochondrial                                                                             | Tufm          | EFTU_RAT  | -0,618S034 | 0,07569899  | -8,1705633 | 10  | 9,78E-06 | 5,88E-05 |
| P85834   |          | Gelsolin (Actin-depolymerizing factor) (ADF) (Brevin)                                                           | Gso           | GELS_RAT  | -0,3196176 | 0,071028918 | -4,4998232 | 235 | 1,07E-05 | 6,41E-05 |
| Q68FP1-2 |          | ATP synthase subunit alpha, mitochondrial                                                                       | Atp5a1        | ATPA_RAT  | 0,92314997 | 0,121829593 | 7,57738695 | 11  | 1,09E-05 | 6,50E-05 |
| P15999   |          | Mitochondrial import inner membrane translocase subunit Tim13                                                   | Timm13 Tim13a |           |            |             |            |     |          |          |
| P62076   |          | Complement C1q subcomponent subunit B                                                                           | Timm13a       | TIM13_RAT | -0,3233094 | 0,072877909 | -4,436316  | 516 | 1,12E-05 | 6,65E-05 |
|          |          | Ubiquitin-like modifier-activating enzyme ATG7 (ATG12-activating enzyme E1                                      | C1qb          | CIQB_RAT  | -1,19C0681 | 0,109208474 | -10,897213 |     | 1,21E-05 | 7,13E-05 |
| P31721   |          | ATG7) (Autophagy-related protein 7) (APG7-like)                                                                 | Atg7          | Apq7l     |            |             |            |     |          |          |
| Q641Y5   |          | Up-regulated during skeletal muscle growth protein 5 (Diabetes-associated protein in insulin-sensitive tissues) | Usmg5Dapit    |           |            |             |            |     |          |          |
| Q9JJW3   |          | Sodium/potassium-transporting ATPase subunit beta-2 (Sodium/potassium-dependent ATPase subunit beta-2)          | Atp1b2        |           |            |             |            |     |          |          |

|           |            |             |            |    |          |          |
|-----------|------------|-------------|------------|----|----------|----------|
| ATG7_RAT  | 0,49814774 | 0,07792964  | 6,39227568 | 15 | 1,21E-05 | 7,13E-05 |
| USMG5_RAT | -0,3363382 | 0,062032002 | -5,4220116 | 25 | 1,26E-05 | 7,37E-05 |
| AT1B2_RAT | -1,2138S11 | 0,096031945 | -12,640076 |    | 1,50E-05 | 8,78E-05 |



|            |                                                                                                                                                                                                                                                                                                                                                                                                                                                                       |            |              |            |                        |                        |            |                       |            |          |            |
|------------|-----------------------------------------------------------------------------------------------------------------------------------------------------------------------------------------------------------------------------------------------------------------------------------------------------------------------------------------------------------------------------------------------------------------------------------------------------------------------|------------|--------------|------------|------------------------|------------------------|------------|-----------------------|------------|----------|------------|
| P13638     | Kinesin-1 heavy chain (Conventional kinesin heavy chain) (Ubiquitous kinesin heavy chain) (UKHC)                                                                                                                                                                                                                                                                                                                                                                      | Kif5bKhc   | KINH_RAT     | -0,2528902 | 0,056198268 -4,4999651 | 122                    | 1,56E-05   | 9,09E-05              |            |          |            |
| Q2PQA9     | Mannose-6-phosphate isomerase (EC 5.3.1.8) (Phosphohexomutase) (Phosphomannose isomerase) (PMI)                                                                                                                                                                                                                                                                                                                                                                       | Mpi        | MPI_RAT      | 0,26394453 | 0,059487165 4,4369996  | 174                    | 1,61E-05   | 9,35E-05              |            |          |            |
| Q68FX1     | residual protein 31 (ERP31)                                                                                                                                                                                                                                                                                                                                                                                                                                           | Erp29      | ERP29_RAT    | -0,6502673 | 0,118969736 -5,4658211 | 22                     | 1,72E-05   | 9,92E-05              |            |          |            |
| P52555     | tRNA-splicing ligase RtcB homolog (EC 6.5.1.3) (p55)                                                                                                                                                                                                                                                                                                                                                                                                                  | Rtcb       | RTCB_RAT     | 0,24153298 | 0,052110599 4,63500669 | 66                     | 1,73E-05   | 9,97E-05              |            |          |            |
| Q6AYT3     | Long-chain specific acyl-CoA dehydrogenase, mitochondrial (LCAD) (EC 1.3.8.8)                                                                                                                                                                                                                                                                                                                                                                                         | Acadl      | ACADL_RAT    | -0,2587381 | 0,056136931 -4,609054  | 66                     | 1,91E-05   | 0,00010912            |            |          |            |
|            | Aldehyde dehydrogenase, mitochondrial (EC 1.2.1.3) (ALDH class 2) (ALDH-                                                                                                                                                                                                                                                                                                                                                                                              |            |              |            |                        |                        |            |                       |            |          |            |
| P15650     | E2(ALDH1)                                                                                                                                                                                                                                                                                                                                                                                                                                                             | Aldh2      | ALDH2_RAT    | -0,4742377 | 0,109545393 -4,3291429 | 214                    | 2,30E-05   | 0,00013112            |            |          |            |
| P11884     | Septin-2 (Vascular endothelial cell specific protein 11)                                                                                                                                                                                                                                                                                                                                                                                                              | Sept2      | Vespll       | SEPT2_RAT  | -0,4095897             | 0,096154474 -4,2597051 | 328        | 2,68E-05              | 0,0001521  |          |            |
|            | Thymosin beta-4 (T beta 4) [Cleaved into: Hematopoietic system regulatory peptide(Seraspenide)]                                                                                                                                                                                                                                                                                                                                                                       | Tmsb4x     | Thyb4 Tmsb4  | TYB4_RAT   | -0,3825182             | 0,085600428 -4,4686479 | 75         | 2,74E-05              | 0,00015513 |          |            |
| Q91Y81     | Serine/threonine-protein phosphatase 6 catalytic subunit (PP6C) (EC 3.1.3.16) (Protein phosphatase V) (PP-V) (Cleaved into: Serine/threonine-protein phosphatase 6 catalytic subunit, N-terminally processed)                                                                                                                                                                                                                                                         | Ppp6c      | Ppv          | PPP6_RAT   | 0,83886                | 0,193734417 4,32994826 | 143        | 2,79E-05              | 0,00015721 |          |            |
| P62329     | Uncharacterized protein C12orf43 homolog                                                                                                                                                                                                                                                                                                                                                                                                                              | C1043      | RAT          | 0,32612537 | 0,067218868 4,85169392 | 33                     | 2,85E-05   | 0,00016023            |            |          |            |
| Q64620     | Aspartate aminotransferase, cytoplasmic (cAspAT) (EC 2.6.1.1) (EC 2.6.1.3) (Cysteine aminotransferase, cytoplasmic) (Cysteine transaminase, cytoplasmic) (cCAT) (Glutamate oxaloacetate transaminase 1) (Transaminase A)                                                                                                                                                                                                                                              | Gotl       |              |            |                        |                        |            |                       |            |          |            |
| Q51034     | Unconventional myosin-Va (Dilute myosin heavy chain, non-muscle)                                                                                                                                                                                                                                                                                                                                                                                                      | Myo5a      | AATC_RAT     | 0,42254128 | 0,065282944 6,47246047 | 12                     | 3,06E-05   | 0,00017101            |            |          |            |
| P13221     | Cyclin-dependent kinase 5 (EC 2.7.11.22) (Cell division protein kinase 5) (Serine/threonine-protein kinase PSSALRE) (Tau protein kinase II catalytic subunit)(TPKII catalytic subunit)                                                                                                                                                                                                                                                                                | Myo5a      | MYO5A_RAT    | -0,3709406 | 0,088406875 -4,1958338 | 596                    | 3,13E-05   | 0,00017454            |            |          |            |
| Q9QYF3     | Fatty acid-binding protein, brain (Brain lipid-binding protein) (BLBP) (Brain-                                                                                                                                                                                                                                                                                                                                                                                        | Cdk5 Cdkn5 | CDK5_RAT     | -0,320939  | 0,075300619 -4,2621035 | 172                    | 3,33E-05   | 0,00018485            |            |          |            |
| CON_007152 | type fatty acid-binding protein) (B-FABP) (Fatty acid-binding protein 7)                                                                                                                                                                                                                                                                                                                                                                                              | Fabp7      | Blbp         | FABP7_RAT  | 0,47931201             | 0,07170741 6,68427453  | 11         | 3,45E-05              | 0,00019064 |          |            |
|            |                                                                                                                                                                                                                                                                                                                                                                                                                                                                       |            |              |            |                        |                        |            |                       |            |          |            |
| Q03114     | Sodium- and chloride-dependent GABA transporter 3 (GAT-3) (Solute carrier family 6 member 11)                                                                                                                                                                                                                                                                                                                                                                         | Slc6all    | Gatb3 Gat-3  | S6all_RAT  | -0,4387573             | 0,101487035 -4,3232842 | 99         | 3,67E-05              | 0,00020199 |          |            |
| P55051     | Alpha-2-macroglobulin (Alpha-2-M)                                                                                                                                                                                                                                                                                                                                                                                                                                     | A2m        | A2mI         | A2M_RAT    | 0,45742732             | 0,106865877 4,28038714 | 119        | 3,80E-05              | 0,0002083  |          |            |
|            | Galectin-3-binding protein (Cyp-C-associated protein) (CypCA) (Lectin galactoside-binding soluble 3-binding protein) (Mac-2-binding protein) (MAC2BP) (Mac-2 BP) (Protein 90K)                                                                                                                                                                                                                                                                                        | Igals3bp   | LG3BP_RAT    | -0,4861173 | 0,114829632 -4,2333785 | 152                    | 3,97E-05   | 0,00021694            |            |          |            |
| P31647     | Sodium/potassium-transporting ATPase subunit alpha-3 (Na(+)/K(+) ATPase alpha-3 subunit) (EC 3.6.3.9) (Na(+)/K(+) ATPase alpha(III) subunit) (Sodium pumpsubunitalpha-3)                                                                                                                                                                                                                                                                                              | Atpla3     | AT1A3_RAT    | -0,276051  | 0,045838394 -6,0222664 | 13                     | 4,29E-05   | 0,00023348            |            |          |            |
| P06238     | Serotransferrin (Transferrin) (Beta-1 metal-binding globulin) (Liver                                                                                                                                                                                                                                                                                                                                                                                                  |            |              |            |                        |                        |            |                       |            |          |            |
| 070513     | regeneration-related protein LRRG03) (Slenderophilin)                                                                                                                                                                                                                                                                                                                                                                                                                 | Tf         | TRFE_RAT     | 0,92212516 | 0,148017059 6,22985733 | 12                     | 4,39E-05   | 0,00023788            |            |          |            |
|            |                                                                                                                                                                                                                                                                                                                                                                                                                                                                       |            |              |            |                        |                        |            |                       |            |          |            |
|            | Protein kinase C and casein kinase substrate in neurons protein 1 (Dynamn praline-rich domain-interacting protein) (Dynamn PRO-interacting protein) (Synaptic, dynamn-associated protein I) (Syndapin-1) (Syndapin-1) (Sdpl)                                                                                                                                                                                                                                          | Pacsinl    |              |            |                        |                        |            |                       |            |          |            |
| P06687     | Adenylate kinase isoenzyme 1 (AK 1) (EC 2.7.4.3) (EC 2.7.4.6) (ATP-AMP transphosphorylase 1) (ATP-AMP phosphotransferase) (Adenylate monophosphate kinase) (Myokinase)                                                                                                                                                                                                                                                                                                | Akl        | KADI_RAT     | -0,25708   | 0,062631459 -4,1046468 | 815                    | 4,46E-05   | 0,00023998            |            |          |            |
| P12346     | T-kininogen 1 (Alpha-1-MAP) (Major acute phase protein) (T-kininogen I) (Thiostatin) (Cleaved into: T-kininogen 1 heavy chain (T-kininogen I heavy chain); T-kinin; T-kininogen 1 light chain (T-kininogen I light chain))                                                                                                                                                                                                                                            | Mapl       | KNTI_RAT     | -0,3665903 | 0,088494422 -4,1425248 | 282                    | 4,54E-05   | 0,00024378            |            |          |            |
| Q9ZOW5     | N-acetylaspate synthetase (NAA synthetase) (N-acetyltransferase 8-like protein) (EC2.3.1.17)                                                                                                                                                                                                                                                                                                                                                                          | Nat8l      | NAT8L_RAT    | -0,4561675 | 0,110235846 -4,1381053 | 281                    | 4,63E-05   | 0,00024713            |            |          |            |
| P39069     | Dolichyl-diphosphooligosaccharide-protein glycosyltransferase subunit 1 (EC 2.4.99.18) (Dolichyl-diphosphooligosaccharide--protein glycosyltransferase 67 kDa subunit) (Ribophorin I) (RPN-I) (Ribophorin-1)                                                                                                                                                                                                                                                          | Rpnl       | RPN I_RAT    | -0,4055431 | 0,09715675 -4,1741114  | 181                    | 4,64E-05   | 0,00024713            |            |          |            |
| P54311     | 14-3-3 protein theta (14-3-3 protein tau)                                                                                                                                                                                                                                                                                                                                                                                                                             | Ywha       | 1433T_RAT    | 1,21335073 | 0,25493285 4,75949148  | 29                     | 4,95E-05   | 0,00026186            |            |          |            |
| P01048     | CDSSH iron-sulfur domain-containing protein 1 (MitoNEET)                                                                                                                                                                                                                                                                                                                                                                                                              | Cisd1      | CISD1_RAT    | -0,4201157 | 0,074860959 -5,6119468 | 15                     | 4,95E-05   | 0,00026186            |            |          |            |
| D3ZVU9     | Brevican core protein (Brain-enriched hyaluronan-binding protein) (BEHAB)                                                                                                                                                                                                                                                                                                                                                                                             | Bean       | Behab        | PGCB_RAT   | -0,2716141             | 0,063873991 -4,2523428 | 88         | 5,26E-05              | 0,00027677 |          |            |
| P07153     | 40S ribosomal protein S4, X isoform                                                                                                                                                                                                                                                                                                                                                                                                                                   | Rps4x      | Rps4         | RS4X_RAT   | 0,55504297             | 0,130384319 4,25697636 | 85         | 5,31E-05              | 0,00027889 |          |            |
| P68255     | Electrogenic sodium bicarbonate cotransporter 1 (Sodium bicarbonate cotransporter) (NBC-like protein) (Na(+)/HCO3(-) cotransporter) (Solute carrier family 4 member 4)                                                                                                                                                                                                                                                                                                | Slc4a4     | Nbc NbcI     | Nbccl      | RnbcI                  | S4A4_RAT               | -0,4378242 | 0,09802014 -4,4666757 | 42         | 5,89E-05 | 0,00030797 |
| B0K020     | Atlastin-1 (EC 3.6.5.-) (Spastic paraplegia 3A homolog)                                                                                                                                                                                                                                                                                                                                                                                                               | Atl1       | Spg3a        | ATLA1_RAT  | -0,3444747             | 0,083471261 -4,1268655 | 136        | 6,38E-05              | 0,00033212 |          |            |
| P55068     | V-type proton ATPase 16 kDa proteolipid subunit (V-ATPase 16 kDa proteolipid subunit) (Vacuolar proton pump 16 kDa proteolipid subunit) (Large neutral amino acids transporter small subunit 1) (4F2 light chain) (4F2 LC) (4F2LC) (Integral membrane protein E16) (Protein TAJ) (L-type amino acid transporter 1) (Solute carrier family 7 member 5)                                                                                                                 | Atp6v0c    | Atp6l        | VATL_RAT   | -0,3660936             | 0,089371246 -4,096324  | 158        | 6,69E-05              | 0,00034711 |          |            |
| Q9J166-3   | Copine-9 (Copine IX)                                                                                                                                                                                                                                                                                                                                                                                                                                                  | Slc7a5     | Mpe16Tat     | LATI_RAT   | -0,243383              | 0,046058424 -5,2842234 | 16         | 7,41E-05              | 0,00038334 |          |            |
| Q6PST4     | ZWIO interactor (SNAP25-interacting protein 30) (Scollin) (ZWIO-interacting protein 1) (Zwint-1)                                                                                                                                                                                                                                                                                                                                                                      | Cpne9      | CPNE9_RAT    | -0,7438464 | 0,182034192 -4,0863007 | 122                    | 7,88E-05   | 0,00040619            |            |          |            |
| P63081     | 26S proteasome non-ATPase regulatory subunit 2                                                                                                                                                                                                                                                                                                                                                                                                                        | Zwint      | Slp30        | ZWINT_RAT  | -0,6174351             | 0,136961102 -4,5081053 | 31         | 8,75E-05              | 0,00044925 |          |            |
| Q63016     | Ras GTPase-activating protein 1 (GAP) (GTPase-activating protein) (RasGAP)                                                                                                                                                                                                                                                                                                                                                                                            | Psm2       | PSM2_RAT     | 0,3937554  | 0,058713557 6,70637951 |                        | 8,79E-05   | 0,00044977            |            |          |            |
| Q5BJS7     | (Ras p21 protein activator) (p120GAP)                                                                                                                                                                                                                                                                                                                                                                                                                                 | Rasal      | Rasa         | RASAI_RAT  | -0,2671535             | 0,051586636 -5,1787339 | 16         | 9,14E-05              | 0,00046618 |          |            |
| Q8BVJ3     | Arfaptin-2 (ADP-ribosylation factor-interacting protein 2)                                                                                                                                                                                                                                                                                                                                                                                                            | Arfp2      | ARFP2_RAT    | 0,46167121 | 0,108849067 4,24138874 | 51                     | 9,36E-05   | 0,00047549            |            |          |            |
|            | Regulating synaptic membrane exocytosis protein 3 (Nim3) (RIM3 gamma)                                                                                                                                                                                                                                                                                                                                                                                                 |            |              |            |                        |                        |            |                       |            |          |            |
| Q4FZT9     | (Rab-3-interacting molecule 3) (RIM 3)                                                                                                                                                                                                                                                                                                                                                                                                                                | Rims3      | Nim3         | RIMS3_RAT  | 0,27906456             | 0,070417119 3,9630215  | 269        | 9,49E-05              | 0,00048039 |          |            |
|            |                                                                                                                                                                                                                                                                                                                                                                                                                                                                       |            |              |            |                        |                        |            |                       |            |          |            |
| P50904     | Rab GTPase-binding effector protein 1 (Rabaptin-5) (Rabaptin-5alpha)                                                                                                                                                                                                                                                                                                                                                                                                  | Rabep1     | Rabpt5       | RABPT5_RAT | 0,5082693              | 0,10800426 4,70601161  | 23         | 9,69E-05              | 0,00048868 |          |            |
|            | Lanosterol 14-alpha demethylase (LDM) (EC 1.14.13.70) (CYPLI) (Cytochrome P450 51A1) (Cytochrome P450-14DM) (Cytochrome P45014DM) (Cytochrome P450L) (Sterol 14-alpha demethylase)                                                                                                                                                                                                                                                                                    | Cyp51a1    | Cyp51        | CP51A_RAT  | -0,6914293             | 0,126251814 -5,4765889 | 13         | 0,0001063             | 0,00053444 |          |            |
| Q6AY65     | 60S ribosomal protein L32                                                                                                                                                                                                                                                                                                                                                                                                                                             | Rpl32      | RL32_RAT     | 1,1453551  | 0,103963173 11,0179907 | 5                      | 0,0001072  | 0,00053713            |            |          |            |
| Q0J1R3     | Adenosine kinase (AK) (EC 2.7.1.20) (Adenosine 5'-phosphotransferase)                                                                                                                                                                                                                                                                                                                                                                                                 | Adk        | ADK_RAT      | 0,25762716 | 0,061701376 4,17538758 | 54                     | 0,00010909 | 0,00054467            |            |          |            |
| Q35550     | 5-oxoprolinase (EC 3.5.2.9) (5-oxo-L-prolinase) (5-OPase) (Pyroglutamase)                                                                                                                                                                                                                                                                                                                                                                                             | Oplah      | OPLA_RAT     | -0,7802747 | 0,127272051 -6,1307623 | 10                     | 0,0001111  | 0,0005528             |            |          |            |
| Q64654     | Protein SIOO-A (S-100 protein alpha chain) (S-100 protein subunit alpha)                                                                                                                                                                                                                                                                                                                                                                                              |            |              |            |                        |                        |            |                       |            |          |            |
| P62912     | (SIOO calcium-binding protein A)                                                                                                                                                                                                                                                                                                                                                                                                                                      | Slc7a5     | Mpe16Tat     | LATI_RAT   | -0,243383              | 0,046058424 -5,2842234 | 16         | 0,00011201            | 0,00055545 |          |            |
| Q64640     | Alpha-enolase (EC4.2.1.11) (2-phospho-D-glycerate hydro-lyase) (Enolase 1) (Non-neural enolase) (NNE)                                                                                                                                                                                                                                                                                                                                                                 | Eno1       | ENO-1        | ENOA_RAT   | -0,3007396             | 0,075203291 -3,9990221 | 106        | 0,00011792            | 0,00056247 |          |            |
| Q46404     | Myelin protein PO (Myelin peripheral protein) (MPP) (Myelin protein zero)                                                                                                                                                                                                                                                                                                                                                                                             | Mpz        | PO           | MYPO_RAT   | 0,30034064             | 0,064350714 4,66724644 | 22         | 0,00011827            | 0,00056247 |          |            |
| P97608     | Plastin-3 (T-plastin)                                                                                                                                                                                                                                                                                                                                                                                                                                                 | Pls3       |              | PLST_RAT   | -0,9023133             | 0,219765815 -4,1057946 | 62         | 0,0001199             | 0,00058851 |          |            |
| P35467     | Diphosphoinositol polyphosphate phosphohydrolase 1 (DIPP-1) (EC 3.6.1.52) (Dienosine 5',5''-P1,P6-hexaphosphate hydrolase 1) (EC 3.6.1.-) (Nucleoside diphosphate-linked moiety X motif 3) (Nudix motif 3) (DNA-(apurinic or apyrimidinic site) lyase (EC 3.1.-.-) (EC 4.2.99.18) (APEX nuclease) (APEN) (Apurinic-apyrimidinic endonuclease 1) (AP endonuclease 1)(REF-1) (Redox factor-1) [Cleaved into: DNA-(apurinic or apyrimidinic site) lyase, mitochondrial ] | Nudt3      | Dipp Dippi   | NUDT3_RAT  | 0,28351728             | 0,073267973 3,86959366 | 425        | 0,00012613            | 0,00061697 |          |            |
| P04764     | Methylmalonate-semialdehyde dehydrogenase (acylating), mitochondrial (MMSDH) (Malonate-semialdehyde dehydrogenase (acylating)) (EC 1.2.1.18) (EC 1.2.1.27) (Aldehyde dehydrogenase family 6 member A)                                                                                                                                                                                                                                                                 | Apexl      | Ape Apex Ref | APEX1_RAT  | -0,6243591             | 0,15437611 -4,0444025  | 74         | 0,00012737            | 0,00062091 |          |            |
| Q63598     | Glutathione S-transferase kappa 1 (EC 2.5.1.18) (GST 13-13) (GST class-kappa a)                                                                                                                                                                                                                                                                                                                                                                                       | Aldh6a1    | Mmsdh        | MMSA_RAT   | -0,2917243             | 0,075480281 -3,8649072 | 327        | 0,00013404            | 0,00065123 |          |            |
| Q566CT     | (GSTK1-1) (rGSTK1) (Glutathione S-transferase subunit 13)                                                                                                                                                                                                                                                                                                                                                                                                             | Gstk1      |              | GSTK1_RAT  | 0,25026124             | 0,061713773 4,05519266 | 64         | 0,00013837            | 0,00067004 |          |            |
| P43138     | CTP synthase 2 (EC 6.3.4.2) (CTP synthetase 2) (UTP--ammonia ligase 2) (Protein arginine N-methyltransferase 1) (EC 2.1.1.-) (Histone-arginine N-methyltransferase PRMT1) (EC 2.1.1.125)                                                                                                                                                                                                                                                                              | Ctp2       |              | PYRG2_RAT  | 0,44950903             | 0,071575897 6,28017326 | 9          | 0,00014435            | 0,00069663 |          |            |
| Q02253     | ATP synthase subunit delta, mitochondrial (F-ATPase delta subunit)                                                                                                                                                                                                                                                                                                                                                                                                    | Prmt1      | HrmtII2      | ANMI_RAT   | -0,3269657             | 0,084454115 -3,8715192 | 179        | 0,00015144            | 0,00072843 |          |            |
| P24473     | Dihydropolypol dehydrogenase, mitochondrial (EC 1.8.1.4) (Dihydropolipoamide dehydrogenase)                                                                                                                                                                                                                                                                                                                                                                           | Atp5d      |              | ATPD_RAT   | -0,3676332             | 0,082068063 -4,4796139 | 23         | 0,00017031            | 0,00081649 |          |            |
| Q5U2NO     | 60S acidic ribosomal protein P1                                                                                                                                                                                                                                                                                                                                                                                                                                       | Did        |              | DLDH_RAT   | -0,3892254             | 0,053890005 -7,2252901 | 7          | 0,00017401            | 0,00083145 |          |            |
| Q63009     | Sorbitol dehydrogenase (EC 1.1.1.14) (L-iditol 2-dehydrogenase)                                                                                                                                                                                                                                                                                                                                                                                                       | Rplpl      |              | RLAI_RAT   | 0,26362632             | 0,06781824 3,88724809  | 101        | 0,00018155            | 0,00086459 |          |            |
| P35434     | Peptidyl-prolyl cis-trans isomerase D (PPIase D) (EC 5.2.1.8) (40 kDa peptidyl-prolyl cis-trans isomerase) (Cyclophilin-40) (CYP-40) (Rotamase D)                                                                                                                                                                                                                                                                                                                     | Sord       | Sdhl         | DHSO_RAT   | -0,3342786             | 0,082376667 -4,0579286 | 42         | 0,00021069            | 0,00100006 |          |            |
| Q6P6R2     | 60S ribosomal protein L23a                                                                                                                                                                                                                                                                                                                                                                                                                                            | Rpl23a     |              | RL23A_RAT  | -0,2684027             | 0,071275372 -3,7657139 | 223        | 0,00021248            | 0,00100529 |          |            |
| P19844     | Four and a half LIM domains protein 1 (FHL-1)                                                                                                                                                                                                                                                                                                                                                                                                                         | Rpl23a     |              | RL23A_RAT  | -0,5336663             | 0,129386932 -4,1245768 | 35         | 0,0002174             | 0,00102518 |          |            |
| P27867     |                                                                                                                                                                                                                                                                                                                                                                                                                                                                       | Fhl1       |              | FHL1_RAT   | 0,22093118             | 0,057437388 3,84646981 | 88         | 0,00022631            | 0,00106371 |          |            |

|            |                                                                                                                                                                                                                                                                                                                                                                                                        |                   |            |            |             |            |     |            |            |
|------------|--------------------------------------------------------------------------------------------------------------------------------------------------------------------------------------------------------------------------------------------------------------------------------------------------------------------------------------------------------------------------------------------------------|-------------------|------------|------------|-------------|------------|-----|------------|------------|
|            | Myosin-10 (Cellular myosin heavy chain, type B) (Myosin heavy chain 10) (Myosin heavy chain, non-muscle IIB) (Non-muscle myosin heavy chain B) (NMHC-B) (Non-muscle myosin heavy chain IIB) (NMHC 11-b) (NMHC-IIB)                                                                                                                                                                                     | myr10             | MYH10_RAT  | 0,2558769  | 0,068852488 | 3,71630583 | 347 | 0,00023557 | 0,00110364 |
| Q6DGG0     |                                                                                                                                                                                                                                                                                                                                                                                                        |                   | MTPN_RAT   | -0,4717416 | 0,119629102 | -3,9433678 | 53  | 0,00023727 | 0,00110801 |
| P62752     | Myotrophin (Granule cell differentiation protein) (Protein V-1)                                                                                                                                                                                                                                                                                                                                        | MtpnGcdp          | Rpl18a     | 0,46832403 | 0,050499386 | 9,27385583 | 5   | 0,00024511 | 0,00114096 |
| Q9WU44     | 60S ribosomal protein L18a                                                                                                                                                                                                                                                                                                                                                                             |                   |            |            |             |            |     |            |            |
| Q9JLT0     | Potassium voltage-gated channel subfamily C member 3 (KSHLID) (Voltage-gated potassium channel subunit Kv3.3)                                                                                                                                                                                                                                                                                          | Kcnc3             | KCNC3_RAT  | -0,2018991 | 0,055005482 | -3,6705263 | 561 | 0,00026517 | 0,00123034 |
| P62775     | Vacuolar protein sorting-associated protein 45 (rVps45)                                                                                                                                                                                                                                                                                                                                                | Vps45Vps45a       | VPS45_RAT  | 0,28679322 | 0,061672657 | 4,65024912 | 16  | 0,00026673 | 0,00123362 |
| P62718     | UPF0587 protein Clorf123 homolog                                                                                                                                                                                                                                                                                                                                                                       |                   | CA123_RAT  | -0,3001662 | 0,078656515 | -3,8161645 | 67  | 0,00029823 | 0,00137489 |
| Q01956     | Histone-binding protein RBBP7 (Nucleosome-remodeling factor subunit RBAP46) (Retinoblastoma-binding protein 7) (RBBP-7)                                                                                                                                                                                                                                                                                | Rbbp7             | RBBP7_RAT  | -0,3682005 | 0,064808412 | -5,6813682 | 9   | 0,00030134 | 0,00138483 |
| Q08700     | 60S ribosomal protein L9                                                                                                                                                                                                                                                                                                                                                                               | Rpl9              | RL9_RAT    | -0,398315  | 0,100598392 | -3,9594565 | 37  | 0,00032847 | 0,00150471 |
| Q498R7     | 8-oxo-dGDP phosphatase NUDT18 (EC 3.6.1.58) (2-hydroxy-dADP phosphatase) (7,8-dihydro-8-oxoguanine phosphatase) (MutT homolog 3) (Nucleoside diphosphate-linked moiety X motif 18) (Nudix motif 18)                                                                                                                                                                                                    | Nudt18Mth3        | NUDT18_RAT | 0,33667605 | 0,083132659 | 4,04986507 | 30  | 0,00033288 | 0,0015201  |
| Q71UF4     | Tubulin beta-2A chain                                                                                                                                                                                                                                                                                                                                                                                  | Tubb2a            | TBB2A_RAT  | 0,30796567 | 0,080055352 | 3,84690912 | 51  | 0,00033399 | 0,00152034 |
| P17077     | Trafficking protein particle complex subunit 3                                                                                                                                                                                                                                                                                                                                                         | Trappc3           | TPPC3_RAT  | -0,4434852 | 0,118506445 | -3,7422879 | 81  | 0,00033943 | 0,00154022 |
| Q641Y7     | Transcription elongation factor B polypeptide 2 (Elongin 18 kDa subunit) (Elongin-B) (EloB) (RNA polymerase II transcription factor Sili subunit B) (Sili p18)                                                                                                                                                                                                                                         | Tceb2             | ELOB_RAT   | 0,3489863  | 0,076040503 | 4,58947904 | 15  | 0,00033543 | 0,00160268 |
| P85108     | Succinyl-CoA ligase [ADP/GDP-forming] subunit alpha, mitochondrial (EC 6.2.1.4) (EC 6.2.1.5) (Succinyl-CoA synthetase subunit alpha) (SCS-alpha)                                                                                                                                                                                                                                                       | Sucig1            | SUCA_RAT   | -0,2974669 | 0,064981186 | -4,5777386 | 15  | 0,00036265 | 0,00163533 |
| QSU122     | Cell adhesion molecule 3 (Immunoglobulin superfamily member 4B) (IgSF48) (Nectin-like protein 1) (NECL-1)                                                                                                                                                                                                                                                                                              | Cadm3Igsf48Nect1  | CADM3_RAT  | 0,25465867 | 0,064880355 | 3,92505049 | 36  | 0,00037498 | 0,00168565 |
| P62870     | Peptidyl-prolyl cis-trans isomerase A (PPIase A) (EC 5.2.1.8) (Cyclophilin A) (Cytochrome A-binding protein) (Rotamase A) (p1B15) (p31) (Cleaved into: Peptidyl-prolyl cis-trans isomerase A, N-terminally processed)                                                                                                                                                                                  | Ppia              | PPIA_RAT   | 0,29034002 | 0,076329967 | 3,80374884 | 51  | 0,00038261 | 0,00170403 |
| P13086     | Sortilin (Glycoprotein 110) (SpilD) (Neurotensin receptor 3) (NTR3)                                                                                                                                                                                                                                                                                                                                    | Sortl             | SORT_RAT   | -0,5645863 | 0,154000482 | -3,6661336 | 109 | 0,00038229 | 0,00170403 |
| Q1WIM3     | Nucleosome assembly protein 1-like 4                                                                                                                                                                                                                                                                                                                                                                   | Nap1l4            | NP1L4_RAT  | -0,258496  | 0,06706918  | -3,854169  | 43  | 0,00038252 | 0,00170403 |
| P10111     | Vitamin D-binding protein (DBP) (VDB) (Ge-globulin) (Group-specific component)                                                                                                                                                                                                                                                                                                                         | Vtbdp             | VTDB_RAT   | 0,42082447 | 0,117692778 | 3,57561846 | 327 | 0,00040211 | 0,00178539 |
| Q54861     | Guanine nucleotide-binding protein subunit beta-5 (Gbeta5) (Transducin beta chains)                                                                                                                                                                                                                                                                                                                    | Gnb5              | GBBS_RAT   | 0,47817804 | 0,115838074 | 4,12798681 | 23  | 0,00040922 | 0,00181135 |
| QSU223     | Thiosulfate sulfurtransferase (EC 2.8.1.1) (Rhodanese)                                                                                                                                                                                                                                                                                                                                                 | Tst               | THTR_RAT   | -0,4275949 | 0,119390632 | -3,5814777 | 152 | 0,00045925 | 0,00202662 |
| P04276     | Clusterin (Dimeric acid glycoprotein) (DAG) (Sulfated glycoprotein 2) (SGP-2) (Testosterone repressed prostate message 2) (TRPM-2) (Cleaved into: Clusterin beta chain; Clusterin alpha chain)                                                                                                                                                                                                         | Clo               | CLUS_RAT   | 0,79473625 | 0,129246469 | 6,14899778 |     | 0,000468   | 0,00205891 |
| P62882     | Oxidation resistance protein 1 (Protein C7)                                                                                                                                                                                                                                                                                                                                                            | Oxrl C7           | OXR1_RAT   | -0,3144408 | 0,083146801 | -3,7817545 | 42  | 0,00048663 | 0,00213436 |
| P24329     | Spermatogenesis-defective protein 39 homolog (hSPE-39) (VPS33B-interacting protein in apical-basolateral polarity regulator) (VPS33B-interacting protein in laterality and apical restriction)                                                                                                                                                                                                         | Vipas39Spe39Vipar | SPE39_RAT  | -0,2192506 | 0,061605674 | -3,5589353 | 153 | 0,00049629 | 0,00217014 |
| P05371     | Bridging integrator 2                                                                                                                                                                                                                                                                                                                                                                                  | Bin2              | BIN2_RAT   | 0,58467419 | 0,162215343 | 3,6043088  | 87  | 0,00052087 | 0,00227074 |
| Q4V8B0     | 60S ribosomal protein L10a                                                                                                                                                                                                                                                                                                                                                                             | Rpl10a            | RI10A_RAT  | 0,23669272 | 0,067155278 | 3,52455866 | 200 | 0,00052575 | 0,00227825 |
| QSPQN6     | Aflatoxin B1 aldehyde reductase member 2 (rAfar2) (EC 1.1.1.11) (Succinic semialdehyde reductase) (SSA reductase)                                                                                                                                                                                                                                                                                      | Akr7a2Afar2Aiar   | ARK72_RAT  | -0,7762232 | 0,160622887 | -4,8325813 | 11  | 0,00052519 | 0,00227825 |
| Q68FR2     | Aldose 1-epimerase (EC 5.1.3.3) (Galactose mutarotase)                                                                                                                                                                                                                                                                                                                                                 | Galm              | GALM_RAT   | 0,54231347 | 0,144088607 | 3,76374982 | 40  | 0,00053774 | 0,00232323 |
| P62907     | Prostaglandin reductase 2 (PRG-2) (EC 1.3.1.48) (15-oxoprostaglandin 13-reductase) (Zinc-binding alcohol dehydrogenase domain-containing protein 1)                                                                                                                                                                                                                                                    | Ptgr2Zadhl        | PTGR2_RAT  | -0,4704481 | 0,127586597 | -3,687285  | 52  | 0,00054214 | 0,00233526 |
| Q8CG4S     | DnaJ homolog subfamily A member 2 (RDJ2)                                                                                                                                                                                                                                                                                                                                                               | Dnaja2            | DNJA2_RAT  | -0,3269618 | 0,091703135 | -3,565437  | 107 | 0,00054453 | 0,00233854 |
| Q66HG4     | Rho guanine nucleotide exchange factor 7 (Beta-Pix) (PAK-interacting exchange factor beta)                                                                                                                                                                                                                                                                                                             | Rmgel7Pak39Pix    | ARHG7_RAT  | 0,26421884 | 0,072609221 | 3,63891573 | 62  | 0,00055936 | 0,00238802 |
| QSBK81     | Aldose reductase (AR) (EC 1.1.1.21) (Aldehyde reductase)                                                                                                                                                                                                                                                                                                                                               | Akr1b1Akr1b4Aldr1 | ALDR_RAT   | 0,31869675 | 0,074242603 | 4,29263971 | 16  | 0,00055917 | 0,00238802 |
| Q35824     | 26S protease regulatory subunit 7 (26S proteasome AAA-ATPase subunit RPT1) (Proteasome 26S subunit ATPase 2) (Protein MSS1)                                                                                                                                                                                                                                                                            | Psmc7Mss1         | PRST_RAT   | -0,6026862 | 0,16871146  | -3,5722894 | 80  | 0,00060279 | 0,00256587 |
| Q55043     | Clathrin light chain B (Lcb)                                                                                                                                                                                                                                                                                                                                                                           | Cltb              | CLCB_RAT   | -0,4457654 | 0,094103749 | -4,7369573 | 11  | 0,00061244 | 0,00259927 |
|            | 3-hydroxyacyl-CoA dehydrogenase type-2 (EC 1.1.1.35) (17-beta-hydroxysteroid dehydrogenase 10) (17-beta-HSD 10) (EC 1.1.1.51) (3-hydroxy-2-methylbutyryl-CoA dehydrogenase) (EC 1.1.1.178) (3-hydroxyacyl-CoA dehydrogenase type II) (Endoplasmic reticulum-associated amyloid beta-peptide-binding protein) (Mitochondrial ribonuclease P protein 2) (Mitochondrial RNase P protein 2) (Type II HADH) | Hsd17b10          | ErabHadh2  |            |             |            |     |            |            |
| P07943     |                                                                                                                                                                                                                                                                                                                                                                                                        |                   | HCD2_RAT   | -0,2793495 | 0,080940438 | -3,4512968 | 341 | 0,00062802 | 0,00265759 |
| Q63347     | Tubulin beta-2B chain (T beta-15)                                                                                                                                                                                                                                                                                                                                                                      | Tubb2b            | Tubb2a     | 0,25073547 | 0,073052421 | 3,43226773 | 245 | 0,00070249 | 0,00296403 |
| P08082     | T-complex protein 1 subunit gamma (TCP-1-gamma) (CCT-gamma)                                                                                                                                                                                                                                                                                                                                            | Cct3              | TCPOG_RAT  | 0,25421841 | 0,060833522 | 4,1789198  | 16  | 0,00070908 | 0,0029831  |
| Q70351     | Sortingnexin-5                                                                                                                                                                                                                                                                                                                                                                                         | Snx5              | SNXS_RAT   | -0,2993141 | 0,084823909 | -3,5286528 | 75  | 0,00071723 | 0,00300573 |
| Q3KR58     | Serine--tRNA ligase, cytoplasmic (EC 6.1.1.11) (Seryl-tRNA synthetase) (SerRS)                                                                                                                                                                                                                                                                                                                         | Sarsrsarsl        | SYSC_RAT   | -0,3208946 | 0,076906477 | -4,1725302 | 16  | 0,00071863 | 0,00300573 |
| Q6P502     | Ig kappa chain C region, B allele                                                                                                                                                                                                                                                                                                                                                                      |                   | KACB_RAT   | -0,254553  | 0,075018684 | -3,3931943 | 350 | 0,00076995 | 0,00321109 |
| B1H267     | Solute carrier family 15 member 2 (Kidney H(+))peptide cotransporter) (Oligopeptide transporter, kidney isoform) (Peptide transporter 2)                                                                                                                                                                                                                                                               | Sclt2a2Hep2z      | S15A2_RAT  | 0,24896948 | 0,066339357 | 3,752968   | 27  | 0,00084759 | 0,0035247  |
| Q6P799     | LETMI and EF-hand domain-containing protein 1, mitochondrial (Leucine zipper-EF-hand-containing transmembrane protein 1)                                                                                                                                                                                                                                                                               | Letmi             | LETMI_RAT  | 0,26758832 | 0,079482235 | 3,36664315 | 284 | 0,00088658 | 0,00359031 |
|            | Ectonucleotide pyrophosphatase/phosphodiesterase family member 6 (ENPP6) (NPP-6) (EC 3.1.4.-) (EC 3.1.4.38) (Choline-specific glycerophosphodiester phosphodiesterase) (Glycerophosphocholine cholinephosphodiesterase) (GPC-Cpde)                                                                                                                                                                     | Enpp6             | ENPP6_RAT  | -0,3441193 | 0,084333983 | -4,0804344 | 16  | 0,0008716  | 0,0036038  |
| P01835     | Cell cycle exit and neuronal differentiation protein 1                                                                                                                                                                                                                                                                                                                                                 | Cend1             | CEND_RAT   | -0,6353679 | 0,123405784 | -5,1486072 | 8   | 0,00087582 | 0,00360637 |
| Q63424     | Sentrin-specific protease 8 (EC 3.4.22.68) (Deneddylase-1) (NEDD8-specific protease 1) (Sentrin/SUMO-specific protease SENP8)                                                                                                                                                                                                                                                                          | Senp8             | SENP8_RAT  | -0,3057321 | 0,083041482 | -3,6816797 | 31  | 0,00087722 | 0,00360637 |
| QXIN6      | Secretory carrier-associated membrane protein 1 (Secretory carrier membrane protein 1) (SCAMP 37)                                                                                                                                                                                                                                                                                                      | Scamp3scamp       | SCAM1_RAT  | -0,5549819 | 0,163608309 | -3,3921373 | 136 | 0,00090847 | 0,00371367 |
| BOBND0     | 60S ribosomal protein L13                                                                                                                                                                                                                                                                                                                                                                              | Rpl13             | RL13_RAT   | -0,437912  | 0,125298569 | -3,494948  | 59  | 0,00090655 | 0,00371367 |
| QSFV4      | Reticulocalbin-2 (Calcium-binding protein ERC-55) (Taipoxin-associated calcium-binding protein 49) (TCBP-49)                                                                                                                                                                                                                                                                                           | Rcn2Rcbs          | RCN2_RAT   | 1,39025245 | 0,159003812 | 8,74351645 | 4   | 0,00094287 | 0,0038434  |
| QSFV8      |                                                                                                                                                                                                                                                                                                                                                                                                        | Mt-atp8           | Atp8       |            |             |            |     |            |            |
| P56603     | ATP synthase protein 8 (AGL) (Chargenn II) (F-ATPase subunit 8)                                                                                                                                                                                                                                                                                                                                        | Mtatp8            | ATP8_RAT   | -0,7668975 | 0,215494138 | -3,558786  | 40  | 0,00097771 | 0,00397417 |
| P41123     | Beta-glucuronidase (EC 3.2.1.31)                                                                                                                                                                                                                                                                                                                                                                       | GusbGus           | BGLR_RAT   | -0,2971212 | 0,087855053 | -3,3819483 | 96  | 0,00104261 | 0,00422808 |
| Q62703     | Mitochondrial import receptor subunit TOM70 (Mitochondrial precursor proteins import receptor) (translocase of outer membrane 70 kDa subunit)                                                                                                                                                                                                                                                          | Tom70a            | TOM70_RAT  | -0,4764916 | 0,141690252 | -3,3629101 | 103 | 0,0010837  | 0,00438035 |
|            | NADH dehydrogenase [ubiquinone] 1 alpha subcomplex subunit 5 (Complex I subunit B13) (Complex I-13kD-B) (CI-13kD-B) (NADH-ubiquinone oxidoreductase 13 kDa-B subunit)                                                                                                                                                                                                                                  | Ndufa5            | NDUA5_RAT  | -0,9119703 | 0,184005062 | -4,9562241 | 8   | 0,00111216 | 0,0044828  |
| P11608     | 40S ribosomal protein S18                                                                                                                                                                                                                                                                                                                                                                              | Rps18             | RS18_RAT   | -0,4204698 | 0,085254847 | -4,9319168 | 8   | 0,00114667 | 0,00460903 |
| P06760     | Serine/threonine-protein phosphatase 2A catalytic subunit beta isoform (PP2A-beta) (EC 3.1.3.16)                                                                                                                                                                                                                                                                                                       | Rppccu            | PP2AB_RAT  | -0,5965894 | 0,17167854  | -3,4750379 | 44  | 0,00116025 | 0,00465065 |
| Q75Q39     | Serine/threonine-protein phosphatase CPPED1 (EC 3.1.3.16) (Calcineurin-like phosphoesterase domain-containing protein 1)                                                                                                                                                                                                                                                                               | Upped1Lstpl       | CPPED_RAT  | -0,4882408 | 0,120359836 | -4,0565096 | 14  | 0,00117815 | 0,00470934 |
| Q63362     | Charged multivesicular body protein 5 (Chromatin-modifying protein 5)                                                                                                                                                                                                                                                                                                                                  | Chmp5             | CHMP5_RAT  | -0,305363  | 0,08996534  | -3,3942103 | 56  | 0,00127048 | 0,00506438 |
| P62271     | 26S protease regulatory subunit 4 (P26s4) (26S proteasome AAA-ATPase subunit RPT2) (Proteasome 26S subunit ATPase 1)                                                                                                                                                                                                                                                                                   | Psmc4             | PRS4_RAT   | -0,2041188 | 0,052815249 | -3,86477   | 16  | 0,00137193 | 0,00545372 |
| P62716     | Bis(S'-nucleosyl)-tetraphosphatase [asymmetrical] (EC 3.6.1.17) (Dienadenosine 5',5''-PI4P-tetraphosphatase asymmetrical hydrolase) (Ap4A hydrolase) (Ap4Aase) (Dienadenosine tetraphosphatase) (Nucleoside diphosphate-linked moiety X motif 2) (Nudix motif 2)                                                                                                                                       | Nudtz             | AP4A_RAT   | 0,27803647 | 0,080073341 | 3,47227261 | 35  | 0,00139161 | 0,00551674 |
| Q66H71     |                                                                                                                                                                                                                                                                                                                                                                                                        | Rps12             | RS12_RAT   | 0,61464013 | 0,173676778 | 3,53898858 | 28  | 0,00142425 | 0,00561527 |
| CON_000213 | Stress-70 protein, mitochondrial (75 kDa glucose-regulated protein) (GRP-75) (Heat shock 70 kDa protein 9) (Mortalin) (Peptide-binding protein 74)                                                                                                                                                                                                                                                     | Hspa9             | Grp75      |            |             |            |     |            |            |
| Q4QQV8     | (PBP74) (mtHSP70)                                                                                                                                                                                                                                                                                                                                                                                      |                   | GRP75_RAT  | 0,3760194  | 0,112126171 | 3,35353824 | 57  | 0,001423   | 0,00561527 |
|            | 26S protease regulatory subunit GB (26S proteasome AAA-ATPase subunit RPT3) (Proteasome 26S subunit ATPase 4) (S6 ATPase) (Tat-binding protein 7) (TBP-7)                                                                                                                                                                                                                                              | Psmc4             | Thp7       |            |             |            |     |            |            |
| P62193     |                                                                                                                                                                                                                                                                                                                                                                                                        |                   | PRS6B_RAT  | 0,29759467 | 0,09160468  | 3,24868411 | 147 | 0,00143685 | 0,00564953 |
| Q6PECO     | Glycerophosphodiester phosphodiesterase domain-containing protein 1 (EC 3.1.-.-)                                                                                                                                                                                                                                                                                                                       | Gdpdl             | GDPD1_RAT  | -0,7411204 | 0,225465772 | -3,2870639 | 88  | 0,00145556 | 0,00570755 |

|         |                                                                                                                                                                                                                                                                      |                      |            |            |             |            |      |            |            |
|---------|----------------------------------------------------------------------------------------------------------------------------------------------------------------------------------------------------------------------------------------------------------------------|----------------------|------------|------------|-------------|------------|------|------------|------------|
| P63324  | Sterol 4- $\alpha$ -carboxylate 3-dehydrogenase, decarboxylating (EC 1.1.1.170)                                                                                                                                                                                      | Nsdhl                | NSDHL_RAT  | -0.2564212 | 0.078603423 | -3.2622147 | 111  | 0.00146908 | 0.00574493 |
| P48721  | Prelamin-A/C (Cleaved into: Lamin-A/C)                                                                                                                                                                                                                               | Lmnlalnmli           | LMNA_RAT   | -0.1250684 | 0.039278295 | -3.1846705 | 391  | 0.00156536 | 0.00605658 |
| Q63570  | Nischarin (Imidazoline receptor 1) (1-1) (IR) (Imidazoline-1 receptor) (IR)                                                                                                                                                                                          | Nisch                | NISCH_RAT  | 0.30242708 | 0.093322051 | 3.24068186 | 115  | 0.00155986 | 0.00605558 |
| QOIVGK4 | Myelin-oligodendrocyte glycoprotein                                                                                                                                                                                                                                  | Mog                  | MOG_RAT    | -0.3841951 | 0.061687083 | -6.2281287 | 5    | 0.00156122 | 0.00605558 |
| Q5PPL3  | Acidic leucine-rich nuclear phosphoprotein 32 family member E                                                                                                                                                                                                        | Anp32e               | AN32E_RAT  | -0.353238  | 0.086822787 | -4.0684938 | 12   | 0.00155781 | 0.00605558 |
|         | Aromatic-L-amino-acid decarboxylase (AADC) (EC4.1.1.28) (DOPA                                                                                                                                                                                                        |                      |            |            |             |            |      |            |            |
| P48679  | decarboxylase) (DOC)                                                                                                                                                                                                                                                 | Ddc                  | DDC_RAT    | 0.52572402 | 0.086613449 | 6.06977358 | 5    | 0.00175294 | 0.00676334 |
|         | Glutathione S-transferase Yb-3 (EC 2.5.1.18) (Chain 4) (GST Yb3) (GST class-                                                                                                                                                                                         |                      |            |            |             |            |      |            |            |
| Q4G017  | mu3)                                                                                                                                                                                                                                                                 | Gstm3                | GSTM4_RAT  | -0.7829C02 | 0.23381089  | -3.3484335 | 40   | 0.00178005 | 0.00684964 |
| Q63345  | Calnexin                                                                                                                                                                                                                                                             | Canx                 | CALX_RAT   | -0.316049  | 0.097336295 | -3.2469801 | 66   | 0.00183462 | 0.00704083 |
| Q5XIEO  | Tyrosine-protein phosphatase non-receptor type 23 (EC 3.1.3.48) (His domain-containing protein tyrosine phosphatase) (HD-PTP) (Protein tyrosine phosphatase TD14) (PTP-TD14) (Fragment)                                                                              | Ptpn23               | PTN23_RAT  | -0.4733819 | 0.089546706 | -5.2864246 | 6    | 0.00185377 | 0.00709545 |
| P14173  | Enoyl-CoA delta isomerase 1, mitochondrial (EC 5.3.3.8) (3,2-trans-enoyl-CoA isomerase) (Delta(3),Delta(2)-enoyl-CoA isomerase) (D3,D2-enoyl-CoA isomerase) (Dodecenoyl-CoA isomerase)                                                                               | Ecol Dci             | ECOL_RAT   | 0.20384272 | 0.061918886 | 3.29209276 | 48   | 0.00187043 | 0.00714028 |
| P08009  | Protein phosphatase 1 regulatory subunit 7 (Protein phosphatase 1 regulatory subunit 22)                                                                                                                                                                             | Ppp1r7Sds22          | PP1R7_RAT  | 0.34789563 | 0.11023257  | 3.15601488 | 155  | 0.00192203 | 0.0073179  |
|         | Neurosecretory protein VGF (VGF8a protein) (Cleaved into: VGF(24-63); VGF(180-194); VGF(375-407); Neuroendocrine regulatory peptide-I (NERP-                                                                                                                         | Vgf                  |            |            |             |            |      |            |            |
| P35565  | 1); Neuroendocrine regulatory peptide-2 (NERP-2); TLQP-11; TLQP-21; TLQP-30; TLQP-62; HFHH-10; AQEE-30; LOEQ-19)                                                                                                                                                     |                      |            |            |             |            |      |            |            |
| O88902  | Nucleosome assembly protein 1-like 1 (NAP-1-related protein)                                                                                                                                                                                                         | Nap1ll Nrp           | NPII1_RAT  | -0.3224253 | 0.103001739 | -3.1302897 | 277  | 0.00193303 | 0.00734042 |
| P23965  | 60S ribosomal protein L8                                                                                                                                                                                                                                             | Rpl8                 | RL8_RAT    | -0.3299907 | 0.106170558 | 3.25725912 | 54   | 0.00194721 | 0.00735555 |
| Q5HZV9  | Myeloid-associated differentiation marker (Myeloid up-regulated protein)                                                                                                                                                                                             | Myadm                | MYADM_RAT  | 0.17452245 | 0.055946525 | 3.11945108 | 270  | 0.00200813 | 0.00750708 |
| P20156  | Small ubiquitin-related modifier 1 (SUMO-1)                                                                                                                                                                                                                          | Sumol                | SUMO1_RAT  | 0.48144804 | 0.142718128 | 3.37341894 | 31   | 0.00200786 | 0.00750708 |
| Q9Z2G8  | Isocitrate dehydrogenase [NAD] subunit alpha, mitochondrial (EC 1.1.1.41) (Isocitric dehydrogenase subunit alpha) (NAD(+)-specific ICDH subunit alpha)                                                                                                               | Idh3a                | IDH3A_RAT  | -0.5193559 | 0.153391989 | -3.3858084 | 30   | 0.00199673 | 0.00750708 |
| P62919  | Dihydropyrimidinase-related protein 4 (DRP-4) (Collapsin response mediator protein 3) (CRMP-3) (UNC33-like phosphoprotein4) (ULIP-4) (Fragment)                                                                                                                      | Dpysl4 Cmp3 Ulip4    | DPYL4_RAT  | -0.6535821 | 0.203244485 | -3.2157434 | 67   | 0.00200387 | 0.00750708 |
| Q6VBQ5  | Myoglobin                                                                                                                                                                                                                                                            | Mb                   | MYG_RAT    | -0.553137  | 0.158970715 | -3.4794897 | 23   | 0.00202684 | 0.00755744 |
| Q5I0H3  | Saccharopine dehydrogenase-like oxidoreductase (EC 1.1.1.15)                                                                                                                                                                                                         | Scpdp                | SCPDL_RAT  | 0.42865422 | 0.106896351 | 4.00999859 | 11   | 0.00205085 | 0.00760764 |
|         | Thioredoxin-dependent peroxide reductase, mitochondrial (EC 1.1.1.1.15)                                                                                                                                                                                              |                      |            |            |             |            |      |            |            |
| Q99NA5  | (PRx III) (Peroxiredoxin-3) (PRX-3)                                                                                                                                                                                                                                  | Prdx3                | PRDX3_RAT  | -0.4238368 | 0.135681736 | -3.1237572 | 202  | 0.00204797 | 0.00760764 |
|         | RWD domain-containing protein 1 (Small androgen receptor-interacting                                                                                                                                                                                                 |                      |            |            |             |            |      |            |            |
| Q62951  | protein)                                                                                                                                                                                                                                                             | Rwddi                | RWDDI_RAT  | 0.22613583 | 0.072784202 | 3.10693565 | 295  | 0.00207448 | 0.00767559 |
| Q9QZ76  | ATP synthase subunit e, mitochondrial (ATPase subunit e)                                                                                                                                                                                                             | Atpsi                | ATPSI_RAT  | 0.29295797 | 0.076507085 | 3.82916136 | 13   | 0.00208846 | 0.00770753 |
| Q6AY30  | Rho GDP-dissociation inhibitor 1 (Rho GDI 1) (Rho-GDI alpha)                                                                                                                                                                                                         | Arhgdia              | GDIR1_RAT  | -0.9601438 | 0.28630286  | -3.3535948 | 31   | 0.00211596 | 0.00778912 |
| Q9ZOV6  | Dolichyl-diphosphooligosaccharide-protein glycosyltransferase subunit DAD1 (Oligosaccharyl transferase subunit DAD1) (EC 2.4.99.18) (Defender against cell death 1) (DAD-1)                                                                                          | Dadl                 | DADI_RAT   | -0.4208137 | 0.13428501  | -3.1337354 | 124  | 0.00215449 | 0.00791076 |
| P54313  | Neurocalcin-delta                                                                                                                                                                                                                                                    | Ncald                | NCALD_RAT  | -0.3850077 | 0.122070511 | -3.1539779 | 84   | 0.0022347  | 0.00818445 |
| Q96ND9  | Secretogranin-3 (1B1075) (Secretogranin III) (Sgll)                                                                                                                                                                                                                  | Scg3                 | SCG3_RAT   | 0.64569465 | 0.138132944 | 4.67444353 | 7    | 0.0022756  | 0.00831315 |
| P29419  | Guanine nucleotide-binding protein G(o) subunit alpha                                                                                                                                                                                                                | Gnaol GnaO Gnao      | GNAO_RAT   | -0.4771591 | 0.139108442 | -3.4301235 | 23   | 0.0022853  | 0.00832749 |
| Q5X173  | ATP-dependent 6-phosphofructokinase, platelet type (ATP-PFK) (PFK-P) [EC 2.7.1.11] (6-phosphofructokinase type C) (Phosphofructo-1-kinase isozyme C) (PFK-C) (Phosphohexokinase)                                                                                     | Pfkp Pfk             | PFKAP_RAT  | 0.3040762  | 0.098972843 | 3.07231954 | 331  | 0.00230025 | 0.00836086 |
| P61805  | Vesicle-associated membrane protein-associated protein A (VAMP-A) (VAMP-associated protein A) (VAP-A) (33 kDa VAMP-associated protein) (VAP-33)                                                                                                                      | VapaVap33            | VAPA_RAT   | -0.2983691 | 0.087228368 | -3.4205509 | 23   | 0.00233901 | 0.0084804  |
| Q5PQNO  | Elongator complex protein 1 (ELP1) (IkappaB kinase complex-associated protein) (IKK complex-associated protein)                                                                                                                                                      | Ikkbp Elp1 Ikap      | ELP1_RAT   | -0.9866562 | 0.273425897 | -3.6084956 | 16   | 0.00235654 | 0.00852251 |
|         | Serine/arginine-rich splicing factor 2 (Splicing component, 35 kDa) (Splicing                                                                                                                                                                                        | Srsf2Sfrs2           |            |            |             |            |      |            |            |
| P47888  | factor SC35) (SC-35) (Splicing factor, arginine/serine-rich 2)                                                                                                                                                                                                       | Srsf2                | SRSF2_RAT  | -1.2935613 | 0.359580099 | -3.5974219 | 16   | 0.00241232 | 0.00870243 |
| P59215  | 60S ribosomal protein L13a                                                                                                                                                                                                                                           | Rpl13a               | RL13A_RAT  | -0.661208  | 0.17303812  | -3.8211694 | 12   | 0.0024343  | 0.00875985 |
| P47860  | Cellular nucleic acid-binding protein (CNBP) (Zinc finger protein 9)                                                                                                                                                                                                 | CnbpZnf9             | CNBP_RAT   | -0.1629952 | 0.053685655 | -3.036104  | 728  | 0.00248206 | 0.00890947 |
|         | Rap guanine nucleotide exchange factor 2 (Cyclic nucleotide ras GEF) (CNrasGEF) (Neural RAP guanine nucleotide exchange protein) (nRap GEF) (PDZ domain-containing guanine nucleotide exchange factor 1) (PDZ-GEF1)                                                  | Rapgef2 Pdzgef1      |            |            |             |            |      |            |            |
| Q9Z270  | (RA-GEF-1) (Ras/Rap1-associating-GEF-1)                                                                                                                                                                                                                              | RPGF2_RAT            | RPGF2_RAT  | -0.4102194 | 0.128480884 | -3.1928437 | 47   | 0.00251403 | 0.009C0187 |
| Q8VHU4  | Elongation factor 1-alpha 1 (EF-1-alpha-1) (Elongation factor Tu) (EF-Tu) (Eukaryotic elongation factor 1 A-1) (eEF1A-1)                                                                                                                                             | Eef1aEefla           | EF1A1_RAT  | 0.32470731 | 0.099562379 | 3.26134543 | 32   | 0.00263533 | 0.00941282 |
|         | Stress-induced-phosphoprotein 1 (STI) (Hsc70/Hsp90-organizing protein)                                                                                                                                                                                               |                      |            |            |             |            |      |            |            |
| Q6POU1  | (Hop)                                                                                                                                                                                                                                                                | Stipi                | STIPI_RAT  | -0.2735938 | 0.083601887 | -3.2725789 | 30   | 0.0026841  | 0.00956335 |
| P35427  | Ras-related protein Ral-A                                                                                                                                                                                                                                            | Raia Ral Ral-a       | RALA_RAT   | -0.3079693 | 0.095706443 | -3.2178532 | 36   | 0.00273251 | 0.00971186 |
| P62634  | 40S ribosomal protein S29                                                                                                                                                                                                                                            | Rps29                | RS29_RAT   | -0.3993425 | 0.088435096 | -4.5156564 | 7    | 0.00274638 | 0.00973715 |
| F1M386  | Calcium/calmodulin-dependent protein kinase type 1 (EC 2.7.11.17) (CaM kinase I) (CaM-KI) (CaM kinase I alpha) (CaMKI-alpha)                                                                                                                                         | Camk1                | KCCI_A_RAT | 0.29227591 | 0.080699558 | 3.62177825 | 14   | 0.00277593 | 0.00981779 |
|         | Heat shock protein 75 kDa, mitochondrial (HSP 75) (TNFR-associated protein 1) (Tumor necrosis factor type 1 receptor-associated protein) (TRAP-1)                                                                                                                    | Trap1 Hsp75          | TRAP1_RAT  | -0.5051709 | 0.16654077  | -3.0333166 | 166  | 0.00280793 | 0.00990672 |
| P62630  | Alpha-ketoglutarate-dependent dioxygenase FTO (EC 1.14.11.-) (Fat mass and obesity-associated protein)                                                                                                                                                               | Fto                  | FTO_RAT    | -0.2143288 | 0.071613753 | -2.9928437 | 547  | 0.00288871 | 0.01014211 |
| Q35814  | E3 ubiquitin-protein ligase NEDD4 (EC 6.3.2.-)                                                                                                                                                                                                                       | Nedd4Nedd4a          | NEDD4_RAT  | -0.1359232 | 0.043008924 | -3.1603477 | 43   | 0.00288462 | 0.01014211 |
| P63322  | E3 ubiquitin-protein ligase RNF181 (EC 6.3.2.-) (RING finger protein 181)                                                                                                                                                                                            | Rnf181               | RN181_RAT  | -0.3746728 | 0.117457336 | -3.1898629 | 37   | 0.00289737 | 0.01014782 |
| P62275  | Potassium voltage-gated channel subfamily A member 2 (RAK) (RBK2) (RCK5)                                                                                                                                                                                             | Kcna2                | KCNA2_RAT  | -0.3103107 | 0.100467995 | -3.088652  | 67   | 0.00292555 | 0.01022172 |
| Q634SO  | (Voltage-gated potassium channel subunit Kv1.2)                                                                                                                                                                                                                      | Itpa                 | ITPA_RAT   | -0.221018  | 0.063274517 | -3.493002  | 16   | 0.00300767 | 0.01048327 |
| Q5XHZO  | Inosine triphosphate pyrophosphatase (ITPase) (Inosine triphosphatase) (EC 3.6.1.19) (Non-canonical purine NTP pyrophosphatase) (Non-standard purine NTP pyrophosphatase) (Nucleoside-triphosphate diphosphatase) (Nucleoside-triphosphate pyrophosphatase) (NTPase) | Nael Appbpl          | ULAI_RAT   | 0.43721088 | 0.135386285 | 3.22935868 | 29   | 0.00307831 | 0.01070363 |
| Q2A121  | NEDD8-activating enzyme E1 regulatory subunit (Amyloid beta precursor protein-binding protein 1, 59 kDa) (APP-BP1) (Amyloid protein-binding protein 1)                                                                                                               | Rpsll                | RSII_RAT   | 0.18889222 | 0.062091834 | 3.04214279 | 83   | 0.00314418 | 0.01088624 |
| Q62940  | 40S ribosomal protein S11                                                                                                                                                                                                                                            | Otubl                | OTUB1_RAT  | 0.12659955 | 0.036465921 | 3.47172235 | 16   | 0.00314592 | 0.01088624 |
| Q6AXU4  | Ubiquitin thioesterase OTUB1 (EC 3.4.19.12) (Deubiquitinating enzyme OTUB1) (OTU domain-containing ubiquitin aldehyde-binding protein 1) (Otubain-1) (Ubiquitin-specific-processing protease OTUB1)                                                                  | MaplaMtapla          | MAP1A_RAT  | -0.3127486 | 0.089623618 | -3.4895779 | 15   | 0.00329321 | 0.01136867 |
| P63142  | Microtubule-associated protein 1A (MAP1 A) [Cleaved into: MAP1A heavy chain, MAP1 light chain LC2]                                                                                                                                                                   | GyglGyg              | GLYG_RAT   | 0.15847798 | 0.052261798 | 3.03238674 | 66   | 0.00346578 | 0.01192523 |
| D3ZW55  | Glycogenin-1 (GN-1) (GNI) (EC 2.4.1.186)                                                                                                                                                                                                                             | Hol                  | HNI_RAT    | 0.43483057 | 0.140169041 | 3.10218696 | 41   | 0.00347096 | 0.01192523 |
| Q9ZIA5  | Hematological and neurological expressed 1 protein [Cleaved into: Hematological and neurological expressed 1 protein, N-terminally processed]                                                                                                                        | Rps21                | RS21_RAT   | -0.2266994 | 0.07386114  | -3.0692652 | 49   | 0.003493   | 0.01197245 |
| P62282  | 40S ribosomal protein S21                                                                                                                                                                                                                                            | Gob4                 | GBB4_RAT   | -0.2947516 | 0.100356841 | -2.937035  | 259  | 0.00361187 | 0.01235055 |
| B2RYG6  | Guanine nucleotide-binding protein subunit beta-4 (Transducin beta chain 4)                                                                                                                                                                                          | Hopx Glig15b Hod Hop | HOP_RAT    | -0.119057  | 0.040951271 | -2.9072843 | 1746 | 0.00369183 | 0.0125941  |
| P34926  | Homeodomain-only protein (Global ischemia-induced gene 15B protein) (Glig15b) (Odd homeobox protein 1)                                                                                                                                                               | Psmb2                | PSB2_RAT   | 0.26394314 | 0.086505463 | 3.05117307 | 44   | 0.00385486 | 0.01311926 |
| Q08730  | Proteasome subunit beta type-2 (EC 3.4.25.1) (Macropain subunit C7-I) (Multicatalytic endopeptidase complex subunit C7-I) (Proteasome component C7-I)                                                                                                                | Fscnl                | FSCNI_RAT  | 0.27290601 | 0.076578487 | 3.56374257 | 12   | 0.00389694 | 0.01323127 |
| Q6AXU6  | Fascin                                                                                                                                                                                                                                                               | Sik27a1 Fatp Fatp1   | SZ7A1_RAT  | -0.3075919 | 0.095619735 | -3.216824  | 22   | 0.00397141 | 0.01345245 |
| P05765  | Long-chain fatty acid transport protein 1 (FATP-1) (Fatty acid transport protein 1) (EC 6.2.1.-) (Solute carrier family 27 member 1)                                                                                                                                 | Tmod2Ntmtd           | TMOD2_RAT  | -0.680557  | 0.187962832 | -3.6212251 | 11   | 0.00401784 | 0.01357786 |
| Q35353  | Tropomodulin-2 (Neuronal tropomodulin) (N-Tmod)                                                                                                                                                                                                                      |                      |            |            |             |            |      |            |            |

|                                                                                   |                                                                                                                                                                                                                                                                                                                                                    |                    |            |            |                        |     |            |            |
|-----------------------------------------------------------------------------------|----------------------------------------------------------------------------------------------------------------------------------------------------------------------------------------------------------------------------------------------------------------------------------------------------------------------------------------------------|--------------------|------------|------------|------------------------|-----|------------|------------|
| P97526                                                                            | Pyruvate dehydrogenase E1 component subunit beta, mitochondrial (PDH-E1B)(EC 1.2.4.1)                                                                                                                                                                                                                                                              | Pdhb               | ODPB_RAT   | -0,3731662 | 0,117678432 -3,1710674 | 22  | 0,00442323 | 0,01474069 |
| Q5XIH7                                                                            | Low molecular weight phosphotyrosine protein phosphatase (LMW-PTP) (LMW-PTPase) (EC 3.1.3.48 ) (Low molecular weight cytosolic acid phosphatase) (EC3.1.3.2)                                                                                                                                                                                       | Acpl               | PPAC_RAT   | -0,5473899 | 0,181623833 -3,0138662 | 38  | 0,00457516 | 0,01521188 |
| Q5XIM5                                                                            | Phosphatidate cytidyltransferase 2 (EC 2.7.7.41) (CDP-DAG synthase 2) (CDP-DG synthase 2) (CDP-diacylglycerol synthase 2) (CDS 2) (CDP-diglyceride pyrophosphorylase 2) (CDP-diglyceride synthase 2) (CTP:phosphatidate cytidyltransferase 2)                                                                                                      | Uosf               | CD52_RAT   | 0,1469181  | 0,048605651 3,02265477 | 36  | 0,00459582 | 0,01524544 |
| P13596                                                                            | Septin-8                                                                                                                                                                                                                                                                                                                                           | sep-08             | SEPT8_RAT  | -0,2855775 | 0,0998384 -2,8603971   | 227 | 0,00462575 | 0,01530954 |
| P48508                                                                            | MOB-like protein phocin (Class II mMOB) (Mob1 homolog 3) (Mob3) (Mps one binder kinase activator-like 3) (Phocin) (Preimplantation protein 3)                                                                                                                                                                                                      | Phocn Prei3        | PHOCN_RAT  | 0,19808608 | 0,053006885 3,73698777 | 9   | 0,00464705 | 0,01534484 |
| P49432                                                                            | Heat shock-related 70 kDa protein 2 (Heat shock protein 70.2) (Testis-specific heat shock protein-related) (HST)                                                                                                                                                                                                                                   | Hspa2 Hst70        | HSP72_RAT  | -0,2654106 | 0,093346066 -2,8432968 | 364 | 0,00471688 | 0,01548372 |
| P41498                                                                            | Neuronal calcium sensor 1 (NCS-1) (Frequenin homolog) (Frequenin-like protein) (Frequenin-like ubiquitous protein)                                                                                                                                                                                                                                 | Ncs1 Flup Freq     | NCSI_RAT   | -0,2749301 | 0,091581312 -3,0020323 | 38  | 0,00472087 | 0,01548372 |
| Q91XU8                                                                            | Complement C4 [Cleaved into : Complement C4 beta chain; Complement C4 alpha chain; C4a anaphylatoxin; Complement C4 gamma chain]                                                                                                                                                                                                                   | C4aa               | C04_RAT    | -0,2311338 | 0,070483969 -3,2792388 | 16  | 0,0047213  | 0,01548372 |
| BOBNFI                                                                            | Neurofilament medium polypeptide (NF-M) (160 kDa neurofilament protein)                                                                                                                                                                                                                                                                            | Nefm Nef3 Nfm      | NFM_RAT    | -0,2416473 | 0,080511441 -3,0014035 | 37  | 0,00479199 | 0,01567993 |
| Q9QYW3                                                                            | Regulator complex protein LAMTOR3 (late endosomal/lysosomal adaptor and MAPK and MTOR activator 3) (Mitogen-activated protein kinase kinase 1-interacting protein 1)                                                                                                                                                                               | Lamtor3Map2kl ipl  | LTOR3_RAT  | 0,29608913 | 0,089717843 3,30022567 | 15  | 0,00485666 | 0,01585556 |
| P14659                                                                            | L-lactate dehydrogenase A chain (LOH-A) (EC 1.1.1.27) (LOH muscle subunit) (LDH-M)                                                                                                                                                                                                                                                                 | Ldha Ldh-1 Ldh1    | LDHA_RAT   | 0,35863765 | 0,125175699 2,86507403 | 125 | 0,00489237 | 0,0159361  |
| P62168                                                                            | Glutathione S-transferase alpha-4 (EC 2.5.1.18) (GST 8-8) (GST K) (Glutathione S-transferase Yk) (GST Yk)                                                                                                                                                                                                                                          | Gsta4              | GSTA4_RAT  | -0,842756  | 0,134483693 -4,7794342 | 5   | 0,00497312 | 0,01616265 |
| P08649                                                                            | Hsc70-interacting protein (Hip) (Protein FAM10A1) (Protein ST13 homolog)                                                                                                                                                                                                                                                                           | St13 Fam10a1 Hip   | F10A1_RAT  | 0,18703809 | 0,065519996 2,85467181 | 126 | 0,0050391  | 0,01634026 |
| P12839                                                                            | Protein FAM98A                                                                                                                                                                                                                                                                                                                                     | Fam98a             | FA98A_RAT  | -0,2424886 | 0,086201011 -2,81306   | 523 | 0,0050918  | 0,01645759 |
| Q5U204                                                                            | Dolichyl-diphosphooligosaccharide-protein glycosyltransferase subunit 2 (EC 2.4.99.18) (Dolichyl-diphosphooligosaccharide-protein glycosyltransferase 63 kDa subunit) (Ribophorin II) (RPN-11) (Ribophorin-2)                                                                                                                                      | Rpn2               | RPN2_RA_T  | 0,22030757 | 0,067938296 3,24275974 | 16  | 0,00509809 | 0,01645759 |
| P04642                                                                            | Tumor protein p63-regulated gene 1-like protein (Mossy fiber terminal-associated vertebrate-specific presynaptic protein)                                                                                                                                                                                                                          | Iprg11 Mover       | TPRGL_RAT  | 0,31054538 | 0,109861046 2,82671054 | 221 | 0,0051342  | 0,01653717 |
| P14942                                                                            | Protein RUFY3 (Rap2-interacting protein x) (RIPx) (Single axon-regulated protein) (Singar)                                                                                                                                                                                                                                                         | Rufy3 Ripx         | RUFY3_RAT  | -0,2670248 | 0,092651601 -2,8820314 | 72  | 0,00520435 | 0,0167258  |
| P50503                                                                            | 1-phosphatidylinositol 4,5-bisphosphate phosphodiesterase gamma-1 (EC 3.1.4.11) (Phosphoinositide phospholipase C-gamma-1) (Phospholipase c-gamma-1) (PLC-gamma-1)                                                                                                                                                                                 | Plcgl              | PLCG1_RAT  | 0,17684964 | 0,062679902 2,82147286 | 209 | 0,00524133 | 0,01680653 |
| Q5FWT1                                                                            | Sortingnexin-3                                                                                                                                                                                                                                                                                                                                     | Snx3               | SNX3_RA_T  | -0,2213087 | 0,030206448 -7,3265396 | 3   | 0,00525277 | 0,01680653 |
| P25235                                                                            | STE20/SPS1-related proline-alanine-rich protein kinase (Ste-20-related kinase) (EC 2.7.11.3) (Pancreatic serine/threonine-protein kinase) (PS/TK) (PSTK) (Serine/threonine-protein kinase 39)                                                                                                                                                      | Stk39PaskSpak      | STK39_RAT  | -0,4782051 | 0,164495442 -2,9071024 | 51  | 0,00538743 | 0,01719925 |
| A8WCF8                                                                            | Neuroendocrine protein 7B2 (Secretogranin V) (Secretogranin-5) (Secretory granule endocrine protein I) (Cleaved into : N-terminal peptide; C-terminal peptide )                                                                                                                                                                                    | Scg5Sgnel          | 7B2_RAT    | -1,0496345 | 0,355193848 -2,9551032 | 37  | 0,00541086 | 0,01723591 |
| Q5FVJO                                                                            | Cytochrome c, somatic                                                                                                                                                                                                                                                                                                                              | Cytc               | CYC_RAT    | 0,24483566 | 0,075648063 3,23650926 | 15  | 0,00553418 | 0,01758992 |
| P10686                                                                            | Renin receptor (ATPase H(+)-transporting lysosomal accessory protein 2) (ATPase H(+)-transporting lysosomal-interacting protein 2) (Renin/prorenin receptor)                                                                                                                                                                                       | Atp6ap2 Atp6ip2    | REN_RAT    | 0,24898914 | 0,081849598 3,0420326  | 24  | 0,00561472 | 0,01780669 |
| Q5U211                                                                            | Translation initiation factor eIF-2B subunit beta (eIF-2B GDP-GTP exchange factor subunit beta)                                                                                                                                                                                                                                                    | Eif2b2 Eif2b       | EI2BB_RAT  | -0,172995  | 0,061006436 -2,835684  | 83  | 0,00574272 | 0,01817269 |
| 088506                                                                            | Microsomal glutathione 5-transferase 1 (Microsomal GST-1) (EC 2.5.1.18) (Microsomal GST-I)                                                                                                                                                                                                                                                         | Mgst1Gst1z         | MGST1_RAT  | -0,4116384 | 0,145062158 -2,8376689 | 74  | 0,00586076 | 0,01850565 |
| P27682                                                                            | Cytosolic non-specific dipeptidase (EC 3.4.13.18) (CNDP dipeptidase 2) Estradiol 17-beta-dehydrogenase 12 (EC 1.1.1.62) (17-beta-hydroxysteroid dehydrogenase 12) (17-beta-HSD 12) (3-ketoacyl-CoA reductase) (KAR) (EC 1.3.1.-)                                                                                                                   | Cndp2              | CNDP2_RA_T | -0,3841559 | 0,129610671 -2,9639216 | 30  | 0,00590073 | 0,01859116 |
| P62898                                                                            | Hsd17b12                                                                                                                                                                                                                                                                                                                                           | Hsd17b12           | DHB12_RAT  | -0,4319113 | 0,154281844 -2,7994953 | 119 | 0,00597361 | 0,01877977 |
| Q6AXS4                                                                            | Gap junction alpha-1 protein (Connexin-43) (Cx43) (Gap junction 43 kDa heart protein)                                                                                                                                                                                                                                                              | Gja1Cx43-43        | CX41_RAT   | -0,2154179 | 0,06660104 -3,234453   | 14  | 0,00599529 | 0,01880696 |
| Q62818                                                                            | Isocitrate dehydrogenase (NADP) cytoplasmic (IDH) (EC 1.1.1.42) (Cytosolic NADP-isocitrate dehydrogenase) (IDP) (NADP(+)-specific IDH) (Oxalosuccinate decarboxylase)                                                                                                                                                                              | Idh1               | IDHC_RAT   | 0,25745545 | 0,087095021 2,95602949 | 30  | 0,00601841 | 0,01883853 |
| P08011                                                                            | ATP-dependent (S)-NAD(P)H-hydrate dehydratase (EC 4.2.1.93) (ATP-dependent NAD(P)HX dehydratase) (Carbohydrate kinase domain-containing protein)                                                                                                                                                                                                   | Car1d              | NNRD_RAT   | -0,5352834 | 0,150096609 -3,5662589 | 9   | 0,00605962 | 0,01892646 |
| Q6QON1                                                                            | Bifunctional protein NCOAT (Meningioma-expressed antigen 5) (Nuclear cytoplasmic 0-GlcNAcase and acetyltransferase) [Includes: Beta-hexosaminidase (EC 3.2.1.52 ) (Beta-N-acetylhexosaminidase) (Hexosaminidase C) (N-acetyl-beta-D-glucosaminidase) (N-acetyl-beta-glucosaminidase) (0-GlcNAcase); Histone acetyltransferase (HAT) (EC 2.3.1.48)] | Mgea0nhexcmea0     | NCOAT_RAT  | 0,26435506 | 0,095650822 2,763751   | 290 | 0,00607979 | 0,01894847 |
| Q6P7R8                                                                            | NADH dehydrogenase [ubiquinone] iron-sulfur protein 4, mitochondrial (Complex 1-18 kDa) (CI-18 kDa) (NADH-ubiquinone oxidoreductase 18 kDa subunit)                                                                                                                                                                                                | Ndufs4             | NDUS4_RAT  | -0,3306618 | 0,062941989 -5,2534374 | 4   | 0,00628248 | 0,01953797 |
| P08050                                                                            | Parvalbuminalpha                                                                                                                                                                                                                                                                                                                                   | PvalbPva           | PRVA_RAT   | -0,338931  | 0,122259181 -2,7722337 | 140 | 0,00632534 | 0,01962897 |
| P41562                                                                            | Propionyl-CoA carboxylase beta chain, mitochondrial (PCCase subunit beta) (EC 6.4.1.3) (Propanoyl-CoA:carbon dioxide ligase subunit beta)                                                                                                                                                                                                          | Pccb               | PCCB_RAT   | -0,2136784 | 0,077912982 -2,7425266 | 368 | 0,00639486 | 0,01980212 |
| D4AAT7                                                                            | 40S ribosomal protein S17                                                                                                                                                                                                                                                                                                                          | Rps17              | RS17_RAT   | -0,5464413 | 0,149600485 -3,6526707 | 8   | 0,00646935 | 0,01998986 |
| Q8VIJ5                                                                            | Matr3 (Nuclear scaffold protein p130MAT3)                                                                                                                                                                                                                                                                                                          | Matr3              | MATR3_RA_T | 0,30862709 | 0,084615474 3,64740725 | 8   | 0,00651875 | 0,02009949 |
| Q5XIF3                                                                            | Leucine-rich PPR motif-containing protein, mitochondrial (130 kDa leucine-rich protein) (LRP 130) (Leucine rich protein 157) (rLRP157)                                                                                                                                                                                                             | Lrp130lrp157       | LPPRC_RAT  | -0,4517239 | 0,110893962 -4,0734765 | 6   | 0,00655008 | 0,02015303 |
| P20625                                                                            | Glutathione S-transferase P (EC 2.5.1.18) (Chain 7) (GST 7-7) (GST class-pi)                                                                                                                                                                                                                                                                       | Gstpl              | GSTPL_RAT  | -0,308276  | 0,112454106 -2,7413497 | 164 | 0,00679785 | 0,02087086 |
| P07633                                                                            | Integrin alpha-1 (CD49 antigen-like family member A) (Laminin and collagen receptor) (VLA-1) (CD antigen CD49a)                                                                                                                                                                                                                                    | Itga1              | ITAI_RAT   | -0,2973322 | 0,106970097 -2,779582  | 70  | 0,00698436 | 0,02139795 |
| P04644                                                                            | Tubulin-specific chaperone E (Tubulin-folding cofactor E)                                                                                                                                                                                                                                                                                          | Tbce               | TBCE_RAT   | -0,2239736 | 0,079010578 -2,8347292 | 41  | 0,00708842 | 0,02167073 |
| P43244                                                                            | Acyl-coenzyme A thioesterase 1 (Acyl-CoA thioesterase 1) (EC 3.1.2.2) (CTE-1) (Inducible cytosolic acyl-coenzyme A thioester hydrolase) (LACH2) (ACH2) (Long chain acyl-CoA thioester hydrolase) (Long chain acyl-CoA hydrolase)                                                                                                                   | Acot1Ctel          | ACOT1_RAT  | -0,4140835 | 0,130143499 -3,1817453 | 13  | 0,00721681 | 0,02201661 |
| Q5SGEO                                                                            | Glutathione S-transferase A6 (EC 2.5.1.18) (GST class-alpha member 6) Peroxiredoxin-6 (EC 1.11.1.15) (1-Cys peroxiredoxin) (1-Cys PRX) (Acidic )                                                                                                                                                                                                   | Gata6              | GSTA6_RAT  | -0,4660597 | 0,168164063 -2,7714581 | 65  | 0,00727048 | 0,02213355 |
| pr: - : : : : ah : : : : x : : : /J! : : (    ) : t   to   -Prdx6 Alpla2 Aop2 Tsa |                                                                                                                                                                                                                                                                                                                                                    |                    |            |            |                        |     |            |            |
| P04906                                                                            | specific antioxidant protein)                                                                                                                                                                                                                                                                                                                      |                    | PRDX6_RAT  | 0,4256345  | 0,157406429 2,70404775 | 237 | 0,00734659 | 0,02231818 |
| P18614                                                                            | Stromal interaction molecule 1                                                                                                                                                                                                                                                                                                                     | Stim1Sim           | STIMI_RAT  | -0,4294674 | 0,068382293 -6,4696081 | 3   | 0,00749359 | 0,02271691 |
| Q5FVQ9                                                                            | 40S ribosomal protein S15 (R1G protein)                                                                                                                                                                                                                                                                                                            | Rps15Rig           | RS15_RAT   | 0,18472315 | 0,060418205 3,05740869 | 16  | 0,00752134 | 0,02275322 |
| 088267                                                                            | Alpha-soluble NSF attachment protein (SNAP-alpha) (N-ethylmaleimide-sensitive factor attachment protein alpha)                                                                                                                                                                                                                                     | napsnapsnapsa      | SNAAL_RAT  | 0,85082525 | 0,229604147 3,70561793 | 7   | 0,00759854 | 0,02293869 |
| Q6AXYO                                                                            | 28 kDa heat- and acid-stable phosphoprotein (PDGF-associated protein) (PAP) (PDGFA-associated protein 1) (PAP1)                                                                                                                                                                                                                                    | Pap1 Haspp2z       | HAP28_RAT  | 0,50098999 | 0,182430241 2,74620037 | 63  | 0,0078494  | 0,02364653 |
| 035244                                                                            | Tropomyosin alpha-1 chain (Alpha-tropomyosin) (Tropomyosin-1) ADP-sugar pyrophosphatase (EC 3.6.1.13) (8-oxo-dGDP phosphatase) (EC 3.6.1.58) (Nucleoside diphosphate-linked moiety X motif 5) (Nudix motif 5)                                                                                                                                      | Tpm1 Alpha-1m Tpm1 | TPMI_RAT   | 0,13899693 | 0,052268793 2,65927184 | 427 | 0,00812547 | 0,02442614 |
| P84903                                                                            | Enoyl-CoA hydratase domain-containing protein 3, mitochondrial                                                                                                                                                                                                                                                                                     | Nudt5              | NUDT5_RA_T | -0,3627281 | 0,107353089 -3,3788324 | 9   | 0,00814205 | 0,02442614 |
| P62845                                                                            | Trifunctional enzyme subunit beta, mitochondrial (TP-beta) [Includes: 3-ketoacyl-CoA thiolase (EC 2.3.1.16) (Acetyl-CoA acyltransferase) (Beta-ketothiolase)]                                                                                                                                                                                      | Echd3              | ECHD3_RAT  | 0,34958282 | 0,090262992 3,87293633 | 6   | 0,0082378  | 0,02466214 |
| P54921                                                                            | Galectin-3 (Gal-3) (35 kDa lectin) (Carbohydrate-binding protein 35) (CBP 35) (Galactose-specific lectin 3) (IgE-binding protein) (Lami nin-b inding protein) (Lectin L-29) (Mac-2antigen)                                                                                                                                                         | Hadhb              | ECHB_RAT   | -0,1783394 | 0,066624595 -2,6767809 | 148 | 0,00827205 | 0,02466905 |
| Q62785                                                                            | COP9 signalosome complex subunit 3 (SGN3) (Signalosome subunit 3)                                                                                                                                                                                                                                                                                  | Lgals3             | LEG3_RAT   | 0,2359186  | 0,086223896 2,73611621 | 57  | 0,0082743  | 0,02466905 |
| P04692                                                                            | FACT complex subunit SSRP1 (Facilitates chromatin transcription complex subunit SSRP1) (Recombination signal sequence recognition protein 1) (Structure-specific recognition protein 1) (T160)                                                                                                                                                     | Cops3Csn3          | CSN3_RAT   | 0,29260045 | 0,087118818 3,35863656 | 9   | 0,00840735 | 0,02496257 |
| Q6AY63                                                                            | Serpin C1idbip                                                                                                                                                                                                                                                                                                                                     | Ssrp1              | SSRP1_RAT  | 0,19993794 | 0,064431977 3,10308567 | 13  | 0,00839675 | 0,02496257 |
| Q3MIEO                                                                            | Serum albumin                                                                                                                                                                                                                                                                                                                                      | Alb                | ALBU_RAT   | 0,20891419 | 0,069574307 3,0027492  | 16  | 0,00843101 | 0,0249814  |

|        |                                                                                                                                                                                                                                                                                                                          |                                  |            |            |             |            |     |            |            |
|--------|--------------------------------------------------------------------------------------------------------------------------------------------------------------------------------------------------------------------------------------------------------------------------------------------------------------------------|----------------------------------|------------|------------|-------------|------------|-----|------------|------------|
| Q60587 | Isocitrate dehydrogenase [NAO] subunit gamma 1, mitochondrial (EC 1.1.1.41) (isocitric dehydrogenase subunit gamma) (NAD(+)-specific IDH subunit gamma)                                                                                                                                                                  | Idh3g                            | IDHG_I_RAT | -0,3755165 | 0,138358142 | -2,7140907 | 61  | 0,00862855 | 0,02551435 |
| P08699 | Cysteine sulfinic acid decarboxylase (EC 4.1.1.29) (Cysteine-sulfinate decarboxylase) (Sulfinolalanine decarboxylase)                                                                                                                                                                                                    | Usaoua                           | CSAD_RAT   | 0,26357134 | 0,097375227 | 2,70675965 | 63  | 0,00873296 | 0,02571769 |
| Q68FW9 | Receptor-type tyrosine-protein phosphatase-like N (R-PTP-N) (105 kDa islet cell antigen) (BEM-3) (Brain-enriched membrane-associated protein tyrosine phosphatase) (ICA105) (PTP IA-2) (PTPLP)                                                                                                                           | Ptpn                             | PTPRN_RAT  | -0,41422   | 0,153937129 | -2,6908385 | 78  | 0,00871616 | 0,02571769 |
| Q04931 | Fatty aldehyde dehydrogenase (EC 1.2.1.3) (Aldehyde dehydrogenase 4) (Aldehyde dehydrogenase family 3 member A2) (Microsomal aldehyde dehydrogenase) (msALDH)                                                                                                                                                            | Aldh3a2Aldh4                     | AL3A2_RAT  | -0,1947872 | 0,065283487 | -2,9837133 | 16  | 0,00877242 | 0,02578127 |
| P02770 | Ras-related protein Rab-Ga (Rab-6)                                                                                                                                                                                                                                                                                       | Rab6a Rab6                       | RAB6A_RAT  | 0,16137293 | 0,061399732 | 2,62823515 | 548 | 0,00882357 | 0,0258789  |
| P41565 | NAO kinase 2, mitochondrial (EC 2.7.1.23) (Mitochondrial NAO kinase) (NAO kinase domain-containing protein 1, mitochondrial)                                                                                                                                                                                             | Nadk2Mnadk Nadkl NA KD_2_RAT     |            | -0,2167161 | 0,081832142 | -2,6483004 | 138 | 0,00903218 | 0,026437   |
|        | ATP-dependent 6-phosphofructokinase, liver type (ATP-PFK) (PFK-L) (EC 2.7.1.11) (6-phospho fructokinase type B) (Phosphofructo-1-kinase isozyme 8) (PFK-B) (Phospho xokinase)                                                                                                                                            | PfkI Pfk-I                       | PFKAL_RAT  | 0,21195147 | 0,077145324 | 2,74743118 | 37  | 0,00922582 | 0,0269491  |
| Q64611 | Cytochrome c oxidase subunit 7A2, mitochondrial (Cytochrome c oxidase subunit VIIa-liver/heart) (Cytochrome c oxidase subunit VIIa-L)                                                                                                                                                                                    | Cox7a2 Cox7a3 Cox7a1 CX 7A_2_RAT |            | 0,27519278 | 0,067084059 | 4,10220825 | 5   | 0,00933465 | 0,02721192 |
| Q63259 | Glycylpeptide N-tetradecanoyltransferase 1 (EC 2.3.1.97) (Myristoyl-CoA:protein N-myristoyltransferase 1) (NMT 1) (Type IN-myristoyltransferase) (Peptide N-myristoyltransferase 1)                                                                                                                                      | Nmt1                             | NMT1_RAT   | -0,2233296 | 0,084356584 | -2,6474472 | 104 | 0,00937191 | 0,02726546 |
| P30839 | Omega-amidase NIT2 (EC 3.5.1.3) (Nitrilase homolog 2)                                                                                                                                                                                                                                                                    | Nit2                             | NIT2_RAT   | -0,2089561 | 0,080114857 | -2,6082067 | 160 | 0,00996365 | 0,02892867 |
| Q9WV81 |                                                                                                                                                                                                                                                                                                                          |                                  |            |            |             |            |     |            |            |
|        | Dihydropyrimidinase-related protein 2 (DRP-2) (Collapsin response mediator protein 2) (CRMP-2) (Turned on after division 64 kDa protein) (TOAD-64)                                                                                                                                                                       | Dpysl2                           | DPYL2_RAT  | -0,2119071 | 0,077618846 | -2,730098  | 33  | 0,01007867 | 0,02920385 |
| Q1HCL7 | 26S proteasome non-ATPase regulatory subunit 1 (26S proteasome regulatory subunit RPN2 ) (26S proteasome regulatory subunit Si) (26S proteasome subunit p112)                                                                                                                                                            | Psm1                             | PSMD1_RAT  | -0,3065233 | 0,117215307 | -2,6150447 | 107 | 0,0102089  | 0,02952194 |
| P30835 | cAMP-dependent protein kinase catalytic subunit beta (PKA C-beta) (EC 2.7.11.11)                                                                                                                                                                                                                                         | PrkacbPkacb                      | KAPCB_RAT  | -0,4125822 | 0,149752568 | -2,7550927 | 26  | 0,01057275 | 0,03051295 |
| P35171 | Sulfotransferase 1 family member 01 (ST1D1) (EC 2.8.2.-) (Dopamine sulfotransferase Sultid1) (Tyrosine-ester sulfotransferase)                                                                                                                                                                                           | Sultid1                          | ST1D1_RAT  | 0,46073286 | 0,170951346 | 2,69511103 | 36  | 0,01062662 | 0,0306072  |
| Q8K1Q0 |                                                                                                                                                                                                                                                                                                                          | Pfndn2                           | PFND2_RAT  | -0,2348954 | 0,090285998 | -2,6016809 | 93  | 0,01079395 | 0,03102722 |
| Q49780 | Prefoldin subunit 2                                                                                                                                                                                                                                                                                                      | Efta                             | ETFA_RAT   | -0,27065S9 | 0,106002859 | -2,5532883 | 712 | 0,01087847 | 0,03111981 |
| P47942 | Electron transfer flavoprotein subunit alpha, mitochondrial (Alpha-ETF)                                                                                                                                                                                                                                                  |                                  |            |            |             |            |     |            |            |
| Q88761 | Alpha-mannosidase 2C1 (EC 3.2.1.24) (Alpha-D-mannoside mannohydrolase) (Mannosidase alpha class 2C member 1)                                                                                                                                                                                                             | Man2c1                           | MA2C1_RAT  | 0,1189562  | 0,046342902 | 2,56687    | 232 | 0,01089085 | 0,03111981 |
| P68182 | Dipeptidyl peptidase 2 (EC 3.4.14.2) (Dipeptidyl aminopeptidase II) (Dipeptidyl peptidase 7) (Dipeptidyl peptidase II) (OPP II) (Quiescent cell proline dipeptidase)                                                                                                                                                     | Dpp7 Dpp2                        | DDP2_RAT   | -0,506S948 | 0,188828584 | -2,6828289 | 37  | 0,0108491  | 0,03111981 |
| G3V9R3 | Tissue alpha-L-fucosidase (EC 3.2.1.51) (Alpha-L-fucosidase I) (Alpha-L-fucoside fucosylhydrolase 1) (Alpha-L-fucosidase 1)                                                                                                                                                                                              | FucalI-fuca                      | FUCO_RAT   | -0,1544S38 | 0,048634105 | -3,1758329 | 9   | 0,01125992 | 0,0321108  |
| 808N18 | 40S ribosomal protein S2                                                                                                                                                                                                                                                                                                 | Rps2                             | RS2_RAT    | -0,298S376 | 0,111657968 | -2,6736796 | 35  | 0,01132226 | 0,0322249  |
|        | Serine protease inhibitor A3M (Serpin A3M) (Serine protease inhibitor 2.4)                                                                                                                                                                                                                                               |                                  |            |            |             |            |     |            |            |
| P13803 | (SPI-2.4)(Fragment)                                                                                                                                                                                                                                                                                                      | Serpina3m                        | SPA3M_RAT  | -0,2928386 | 0,114984253 | -2,5467715 | 255 | 0,01146093 | 0,03255537 |
|        | Insulin-degrading enzyme (EC 3.4.24.56) (Insulin protease) (Insulinase)                                                                                                                                                                                                                                                  |                                  |            |            |             |            |     |            |            |
| P21139 | (Insulysin)                                                                                                                                                                                                                                                                                                              | ide                              | IDE_RAT    | -1,11766   | 0,330139284 | -3,3854197 | 7   | 0,01167209 | 0,03309003 |
| Q9EP81 | Tubulin polymerization-promoting protein family member 3                                                                                                                                                                                                                                                                 | Tppp3                            | TPPP3_RAT  | 0,20334878 | 0,079435512 | 2,55992284 | 115 | 0,01176614 | 0,03329126 |
|        | Myosin-9 (Cellular myosin heavy chain, type A) (Myosin heavy chain 9) (Myosin heavy chain, non-muscle Ila) (Non-muscle myosin heavy chain A) (NMMHC-A) (Non-muscle myosin heavy chain Ila) (NMMHC II-a) (NMMHC-IIA)                                                                                                      | Myh9                             | MYH9_RAT   | 0,30SSS074 | 0,105699788 | 2,89074122 | 14  | 0,01185698 | 0,03348263 |
| P17164 | Proteasome subunit beta type-8 (EC 3.4.25.1) (Macropain subunit C13) (Multicatalytic endopeptidase complex subunit C13) (Proteasome component C13) (Proteasome subunit beta-Si)                                                                                                                                          | Psmb8                            | PSB8_RAT   | -0,2766204 | 0,107852655 | -2,564799  | 84  | 0,01210125 | 0,03410567 |
| P27952 | Leukocyte elastase inhibitor A (Serine protease inhibitor EIA) (Serpin B1a)                                                                                                                                                                                                                                              | Serpinb1a                        | ILEUA_RAT  | 0,79317117 | 0,207018012 | 3,83141137 | 5   | 0,01223009 | 0,03440161 |
| Q63556 | NADH-ubiquinone oxidoreductase chain 4 (EC 1.6.5.3) (NADH dehydrogenase subunit4)                                                                                                                                                                                                                                        | Mtnd4 mt-Nd4 Nd4                 | NU4M_RAT   | -0,1862764 | 0,070409965 | -2,6455976 | 33  | 0,01239338 | 0,03479309 |
| P35559 | Delta-1-pyrroline-5-carboxylate dehydrogenase, mitochondrial (PSC dehydrogenase) (EC 1.2.1.88) (Aldehyde dehydrogenase family 4 member A1) (L-glutamate gamma-semialdehyde dehydrogenase)                                                                                                                                | Aldh4a1                          | AL4A1_RAT  | -0,2716874 | 0,107653224 | -2,5237278 | 149 | 0,01266001 | 0,03547261 |
| Q5PPN5 | Heme oxygenase 2 (H0-2) (EC 1.14 .99 .3)                                                                                                                                                                                                                                                                                 | Hmox2                            | HMOX2_RAT  | 0,2172621S | 0,085581975 | 2,53864378 | 98  | 0,01270261 | 0,0355523  |
| Q62812 |                                                                                                                                                                                                                                                                                                                          |                                  |            |            |             |            |     |            |            |
| P28064 | Monocarboxylate transporter 1 (MCT 1) (Solute carrier family 16 member 1)                                                                                                                                                                                                                                                | Slc16a1Mct1                      | MOTI_RAT   | 0,2881S02  | 0,100933709 | 2,85484608 | 14  | 0,01272767 | 0,03552425 |
| Q4G075 | cGMP-dependent 3',5'-cyclic phosphodiesterase (EC 3.1.4.17) (Cyclic GMP-stimulated phosphodiesterase) (CGS-PDE) (cGSPDE)                                                                                                                                                                                                 | Pde2a                            | PDE2A_RAT  | 0,28380917 | 0,112428309 | 2,52435682 | 121 | 0,01288561 | 0,03589562 |
| P05508 | Lambda-crystallin homolog (EC 1.1.1.45) (L-gulonate 3-dehydrogenase) (Gul3DH)                                                                                                                                                                                                                                            | CryII Cry                        | CRYLI_RAT  | -0,7S343S3 | 0,176684385 | -4,2643006 | 4   | 0,01300898 | 0,03616949 |
| POC2X9 | CD59 glycoprotein (MAC-inhibitory protein) (MAC-IP) (Membrane attack complex inhibition factor) (MACIF) (Protectin) (CD antigen CD59)                                                                                                                                                                                    | Cd59                             | CDS9_RAT   | -0,416S90S | 0,161765681 | -2,5752711 | 49  | 0,01308543 | 0,03622078 |
| P23711 | Small glutamine-rich tetratricopeptide repeat-containing protein beta (Beta-SGT) (Small glutamine-rich protein with tetratricopeptide repeats 2)                                                                                                                                                                         | Sgtb Sgt2                        | SGTB_RAT   | -0,22734   | 0,086145752 | -2,6390158 | 30  | 0,0130593  | 0,03622078 |
|        | Rho-associated protein kinase 2 (EC 2.7.11.1) (Rho-associated, coiled-coil-containing protein kinase 2) (Rho-associated, coiled-coil-containing protein kinase II) (RUCK-II) (RhoA-binding kinase 2) (p150 ROK-alpha) (RUKalpha) (p164 ROCK-2)                                                                           | Rock2                            | ROCK2_RAT  | -0,346S974 | 0,10917686  | -3,1746419 | 8   | 0,01310274 | 0,03622078 |
| P53987 | Complex III assembly factor LYRM7 (LYR motif-containing protein 7)                                                                                                                                                                                                                                                       | Lyrm7MZM1L                       | LYRM7_RAT  | -1,1S77226 | 0,351701489 | -3,2917763 | 7   | 0,01327004 | 0,03661314 |
| Q01062 | Alpha-actinin-1 (Alpha-actinin cytoskeletal isoform) (F-actin cross-linking protein) (Non-musclealpha-actinin-1)                                                                                                                                                                                                         | Acta11                           | ACTN1_RAT  | 0,212402S9 | 0,082430677 | 2,576742   | 45  | 0,01332421 | 0,03669243 |
| Q811X6 | C-1-tetrahydrofolate synthase, cytoplasmic (C1-THF synthase) (Cleaved into: C-1-tetrahydrofolate synthase, cytoplasmic, N-terminally processed) (Includes: Methylene tetrahydrofolate dehydrogenase (EC 1.5.1.5); Methylenetetrahydrofolate cyclohydrolase (EC 3.5.4.9); Formyltetrahydrofolate synthetase (EC 6.3.4.3)) | Mthfd1Mthfd                      |            |            |             |            |     |            |            |
| P27274 | Alpha-crystallin B chain (Alpha(B)-crystallin)                                                                                                                                                                                                                                                                           | Cryab                            | CITC_RAT   | -0,3548811 | 0,13617563  | -2,6060541 | 35  | 0,01336332 | 0,03673003 |
| Q80W98 | Synaptotagmin-1 (Synaptotagmin I) (Sytl) (p65)                                                                                                                                                                                                                                                                           | Sytl                             | CRYAB_RAT  | -0,4476662 | 0,173038678 | -2,5870876 | 39  | 0,01352323 | 0,03709891 |
| Q62868 | Synaptoagmin-1 (Synaptoagmin I) (Sytl) (p65)                                                                                                                                                                                                                                                                             | Bsa                              | SYTL_RAT   | 0,311S8338 | 0,104510736 | 2,98135288 | 10  | 0,01377579 | 0,03772004 |
| 84F7A1 | Protein bassoon                                                                                                                                                                                                                                                                                                          | Echl                             | BSN_RAT    | -0,4913226 | 0,058448345 | -8,4060987 | 2   | 0,01385828 | 0,03787406 |
| Q921P2 | Delta(3,5)-Delta(2,4)-dienoyl-CoA isomerase, mitochondrial (EC 5.3.3.-)                                                                                                                                                                                                                                                  | Echl                             | ECHI_RAT   | 0,3329S63  | 0,124055763 | 2,68392449 | 21  | 0,01389599 | 0,03790531 |
|        | Splicing factor U2AF 26 kDa subunit (Liver regeneration-related protein LRRG157/LRRG158) (U2 auxiliary factor 26) (U2 small nuclear RNA auxiliary factor 1-like protein 4)                                                                                                                                               | U2af14 Cb2-806 Cb2-807           | U2AF4_RAT  | -0,24SS32  | 0,09855167  | -2,4914037 | 130 | 0,01398309 | 0,03799925 |
| P27653 | Enoyl-CoA hydratase, mitochondrial (EC 4.2.1.17 ) (Enoyl-CoA hydratase 1) (Short-chain enoyl-CoA hydratase) (SCEH)                                                                                                                                                                                                       | Echsl                            | ECHM_RAT   | 0,2690378  | 0,107714511 | 2,49769316 | 111 | 0,01396698 | 0,03799925 |
| P23928 | LanC-like protein 1 (40 kDa erythrocyte membrane protein) (p40)                                                                                                                                                                                                                                                          | Lanc1Gpr69a                      | LANC1_RAT  | -0,203220S | 0,08151156  | -2,4931489 | 120 | 0,01402441 | 0,03803989 |
| P21707 | 40S ribosomal protein S26                                                                                                                                                                                                                                                                                                | Rps26                            | RS26_RAT   | 0,SS1S2871 | 0,161126582 | 3,42295297 | 6   | 0,01409254 | 0,03815297 |
| Q88778 |                                                                                                                                                                                                                                                                                                                          |                                  |            |            |             |            |     |            |            |
| Q62651 | Pyruvate carboxylase, mitochondrial (EC 6.4.1.1) (Pyruvic carboxylase) (PCB)                                                                                                                                                                                                                                             | Pc                               | PYC_RAT    | -0,2080982 | 0,079969298 | -2,6022265 | 29  | 0,01443864 | 0,03901678 |
| Q77P17 | Inactive phospholipase C-like protein 1 (PLC-L) (PRIP) (Phospholipase c-related but catalytically inactive protein) (p130)                                                                                                                                                                                               | Fam213b                          | PGFS_RAT   | -0,392S277 | 0,107475232 | -3,8522619 | 5   | 0,01471342 | 0,03968499 |
| P14604 | 40S ribosomal protein S3                                                                                                                                                                                                                                                                                                 | Rps3                             | PLQLI_RAT  | -0,8S91377 | 0,344383466 | -2,4947125 | 67  | 0,01507775 | 0,04059179 |
| Q90X69 | Isovaleryl-CoA dehydrogenase, mitochondrial (IVD) (EC 1.3.8.4)                                                                                                                                                                                                                                                           | Rps3                             | RS3_RAT    | -0,2854728 | 0,114205974 | -2,499631  | 56  | 0,01538934 | 0,04135348 |
| P62856 | Eukaryotic translation initiation factor 5 (eIF-5)                                                                                                                                                                                                                                                                       | Ied                              | IVD_RAT    | -0,2336S8  | 0,091965137 | -2,5407236 | 36  | 0,01551691 | 0,04161877 |
| P52873 | N(G),N(G)-dimethylarginine dimethylaminohydrolase 2 (DDAH-2) (Dimethylarginine dimethylaminohydrolase 2) (EC 3.5.3.18) (DDAHII)                                                                                                                                                                                          | Eifs                             | IFS_RAT    | -0,09S707  | 0,039462539 | -2,4252609 | 435 | 0,01570349 | 0,04204107 |
| Q3ZV7R | (Dimethylarginine dimethylaminohydrolase-2)                                                                                                                                                                                                                                                                              | Ddah2                            | DDAH2_RAT  | 0,26466454 | 0,086681954 | 3,05328298 | 8   | 0,01574234 | 0,04206703 |
| Q62688 | 40S ribosomal protein S16                                                                                                                                                                                                                                                                                                | Rps16                            | RS16_RAT   | 0,18993896 | 0,077055936 | 2,46494915 | 77  | 0,01593032 | 0,04249068 |
| P62909 | 60S ribosomal protein LIS                                                                                                                                                                                                                                                                                                | Rpl1S                            | RI S_RAT   | -0,1140143 | 0,046961489 | -2,427826  | 226 | 0,01597201 | 0,04252326 |
|        | Creatine kinase LI-type, mitochondrial (EC 2.7.3 . 2) (Acidic-type mitochondrial                                                                                                                                                                                                                                         |                                  |            |            |             |            |     |            |            |

|        |                                                                                   |             |          |            |                        |                           |
|--------|-----------------------------------------------------------------------------------|-------------|----------|------------|------------------------|---------------------------|
| P12007 | creatine kinase) (Mia-CK) (Ubiquitous mitochondrial creatine kinase) (U-MCK)      | CkmtlCkmt   | KCRU_RAT | -0,6S061S9 | 0,258051256 -2,5212663 | 38 0,01600802 0,04254066  |
| Q07205 | Triosephosphate isomerase (TIM) (EC 5.3.1.1) (Triose-phosphate isomerase)         | Tpil        | TPIS_RAT | -0,26104S3 | 0,106376059 -2,4539857 | 77 0,01638698 0,04346766  |
| Q6MG60 | Elongator complex protein 2 (ELP2) (SHINC-2) (STAB-interacting protein 1) (StiPI) | Elp2Statipl | ELP2_RAT | 0,191248S7 | 0,078602525 2,43310978 | 118 0,01647005 0,04360786 |

|        |                                                                                                                                                                                                                                                                                                                                          |                    |            |            |             |            |     |            |            |
|--------|------------------------------------------------------------------------------------------------------------------------------------------------------------------------------------------------------------------------------------------------------------------------------------------------------------------------------------------|--------------------|------------|------------|-------------|------------|-----|------------|------------|
| P62250 | Unconventional myosin-1e (Myosin heavy chain myr 3) (Unconventional myosin1E)<br>Multifunctional protein ADE2 [Includes : Phosphoribosylaminoimidazole-                                                                                                                                                                                  | Myo1eMyr3          | MYO1_E_RAT | -0,1930592 | 0,078556582 | -2,457582  | 68  | 0,0165423  | 0,04371894 |
| P61314 | succinocarboxamide synthase (EC 6.3.2.6) (SAICAR synthetase);<br>Phosphoribosylaminoimidazole carboxylase (EC 4.1.1.21) (AIR carboxylase) (AIRC)                                                                                                                                                                                         | PaicsAde2Airc      | PUR6_RAT   | -0,295456  | 0,119726197 | -2,4677643 | 56  | 0,01667751 | 0,04399569 |
| P25809 | Calcium -dependent secret ion activator 1 (Calcium-dependent activator protein for secretion 1) (CAPS-1) (rCAPS)                                                                                                                                                                                                                         | LaapsLapsCaps1     | CAPSI_RAT  | -0,2808628 | 0,116546779 | -2,409872  | 164 | 0,01706478 | 0,04488742 |
| P48500 | Ubiquitin-fold modifier 1<br>Proteasome subunit alpha type-1 (EC 3.4.25.1) (Macropain subunit C2) (Multicatalytic endopeptidase complex subunit C2) (Proteasome component C2) (Proteasome nu chain)                                                                                                                                      | Ufm1               | UFMI_RAT   | -0,261204  | 0,108574613 | -2,4057561 | 194 | 0,01707775 | 0,04488742 |
| Q496Z0 | 4F2 cell-surface antigen heavy chain (4F2hc) (Solute carrier family 3 member 2) (CD antigen CD98)                                                                                                                                                                                                                                        | Psmal              | PSAI_RAT   | 0,2742433  | 0,091627495 | 2,99302411 | 8   | 0,01725419 | 0,04526873 |
| Q63356 | Excitatory amino add transporter 2 (GLT-1) (Sodium-dependent glutamate/aspartate transporter 2) (GLUT-RI (Solute carrier family 1 member 2))                                                                                                                                                                                             | Slc3a2             | 4F2_RAT    | -0,3593958 | 0,123488905 | -2,9103492 | 9   | 0,01730141 | 0,04531023 |
| P51583 | Fetuin-B (Fetuin-like protein IRL685)                                                                                                                                                                                                                                                                                                    | Slc1 a2 Eaat2 Glt1 | EAA2_RAT   | 0,20275183 | 0,084163973 | 2,40900975 | 135 | 0,017345   | 0,0453421  |
| Q62717 | AP-2 complex subunit sigma (Adaptor protein complex AP-2 subunit sigma) (Adaptor-related protein complex 2 subunit sigma) (Clathrin assembly protein 2 sigma small chain) (Clathrin coat assembly protein AP17) (Clathrin coat-associated protein AP17) (Plasma membrane adaptor AP-217 kDa protein) (Sigma-adaptin 3b) (Sigma2-adaptin) | Fetub              | FETUB_RAT  | -0,1715035 | 0,071909501 | -2,3849904 | 530 | 0,01743009 | 0,04548214 |
| Q5BJP3 | Obg-like ATPase 1                                                                                                                                                                                                                                                                                                                        | Ap2sl Ap17 Claps2  | AP2S1_RAT  | -0,2908844 | 0,118962019 | -2,4451875 | 55  | 0,01770778 | 0,04612334 |
| P18420 | DnaJ homolog subfamily A member 1 (DnaJ-like protein 1) (Heat shock proteinJ2) (HSJ-2)                                                                                                                                                                                                                                                   | Olal               | OLAI_RAT   | 0,22991856 | 0,096120181 | 2,39199046 | 175 | 0,01781699 | 0,04632418 |
| Q794F9 | Cyclin-G-associated kinase (EC 2.7.11.1)                                                                                                                                                                                                                                                                                                 | Dnajal Hsj2Rdjl    | DNJAI_RAT  | -0,4478929 | 0,186265337 | -2,4045959 | 108 | 0,01789182 | 0,04643507 |
| P31596 | Prenylcysteine oxidase (EC 1.8.3.5 ) (Chloride ion pump-associated 55 kDa protein)                                                                                                                                                                                                                                                       | Gak                | GAK_RAT    | -0,4040241 | 0,163827075 | -2,4661619 | 41  | 0,01792881 | 0,04644754 |
| Q9QX79 | CBI cannabinoid receptor-interacting protein 1 (CRIP-1)                                                                                                                                                                                                                                                                                  | PCYOX1UPSS         | PCYOX_RAT  | 0,39782188 | 0,134528643 | 2,95715375 | 8   | 0,01822531 | 0,04713104 |
| P62744 | Paraspeckle component 1                                                                                                                                                                                                                                                                                                                  | Cnrip1             | CNRPI_RAT  | -0,2481328 | 0,103460028 | -2,3983444 | 88  | 0,01858153 | 0,04796628 |
| AQJPJ7 | Protein kinase C alpha type (PKC-A) (PKC-alpha) (EC 2.7.11.13)                                                                                                                                                                                                                                                                           | Pspcl              | PSPCI_RAT  | -0,2884174 | 0,12164861  | -2,3709062 | 214 | 0,01863213 | 0,04801102 |
| P63036 |                                                                                                                                                                                                                                                                                                                                          | Prkca Pkca         | KPCA_RAT   | -0,4735792 | 0,185784204 | -2,549082  | 21  | 0,01868093 | 0,04805095 |
| P97874 |                                                                                                                                                                                                                                                                                                                                          |                    |            | -0,320701  | 0,126873553 | -2,5277212 | 23  | 0,01880578 | 0,04811478 |
| Q99MLS |                                                                                                                                                                                                                                                                                                                                          |                    |            | -0,2588049 | 0,106711057 | -2,4252862 | 52  | 0,01880423 | 0,04811478 |
| Q5M7A7 |                                                                                                                                                                                                                                                                                                                                          |                    |            | -0,1333702 | 0,050185159 | -2,6575623 | 14  | 0,01875015 | 0,04811478 |
| Q4KLH4 |                                                                                                                                                                                                                                                                                                                                          |                    |            | -0,4328384 | 0,127142916 | -3,4043452 | 5   | 0,01916048 | 0,04893554 |
| P05696 |                                                                                                                                                                                                                                                                                                                                          |                    |            | -0,19C0497 | 0,076722683 | -2,4770995 | 28  | 0,01955016 | 0,04984256 |

Supplementary Table S2: Altered proteins by Ad-Bgal infection after RA

| Protein | Description                                                                                                                                                                                                                                                                                                                                                         | Gene    | Entry Name        | Estimate     | Fold Change | Std. Error | t value    | DF   | p value | adj. p value |
|---------|---------------------------------------------------------------------------------------------------------------------------------------------------------------------------------------------------------------------------------------------------------------------------------------------------------------------------------------------------------------------|---------|-------------------|--------------|-------------|------------|------------|------|---------|--------------|
| B0BN93  | 26S proteasome non-ATPase regulatory subunit 13 (26S proteasome regulatory subunit RPN9) (26S proteasome regulatory subunit 511) (26S proteasome regulatory subunit p40.5)                                                                                                                                                                                          | Psm13   | PSD13_RAT         | -1,155993263 |             | 0,10892362 | -10,61288  | 125  |         |              |
|         | Rab GTPase-binding effector protein 1 (Rabaptin-5) (Rabaptin-Salpa)                                                                                                                                                                                                                                                                                                 | Rabpt5  | RABE1_RAT         | -2,27050162  |             | 0,05875012 | -38,64676  | 54   |         |              |
| 035550  | Glutamine peptidase (EC 3.4.11.1) (Cysteine aminopeptidase)                                                                                                                                                                                                                                                                                                         | Gpxl    | GPXI_RAT          | -1,866954523 |             | 0,09452584 | -19,750732 | 79   |         |              |
| P05545  | Serine protease inhibitor A3K (Serpin A3K) (CPI-21) (Contrapsin-like protease inhibitor 1) (GHR-P63) (Growth hormone-regulated proteinase inhibitor) (Kallikrein-binding protein) (KBP) (SPI-2.3) (Serine protease inhibitor 2) (SPI-2) (Thyroid hormone-regulated protein)                                                                                         | na      | Spina3_RAT        | 2,937846306  |             | 0,10974679 | 26,7693132 | 116  |         |              |
| P07633  | Propionyl-CoA carboxylase beta chain, mitochondrial (PCCase subunit beta) (EC 6.4.1.3) (Propanoyl-CoA: carbon dioxide ligase subunit beta)                                                                                                                                                                                                                          | Pccb    | PCCB_RAT          | -1,797240535 |             | 0,10526829 | -17,072952 | 70   |         |              |
| P09812  | Glycogen phosphorylase, muscle form (EC 2.4.1.1) (Myophosphorylase)                                                                                                                                                                                                                                                                                                 | Pygm    | PYGM_RAT          | -0,929480115 |             | 0,07284617 | -12,759492 | 239  |         |              |
| P11442  | Clathrin heavy chain 1                                                                                                                                                                                                                                                                                                                                              | Cite    | CLH1_RAT          | -0,74546929  |             | 0,04031118 | -18,492866 | 1787 |         |              |
| P13264  | Glutaminase kidney isoform, mitochondrial (GLS) (EC 3.5.1.2) (L-glutaminase) (L-glutamine amidohydrolyase) [Cleaved into: Glutaminase kidney isoform 68 kDa chain; Glutaminase kidney isoform 65 kDa chain] 3-ketoacyl-CoA thio lyase, mitochondrial (EC 2.3.1.16) (Acetyl-CoA acyltransferase) (Beta-ketothiolase) (Mitochondrial 3-oxoacyl-CoA thio lyase)        | Gls     | GLSK_RAT          | -4,293237217 |             | 0,23892245 | -17,969166 | 27   |         |              |
| P13437  | Proteasome subunit alpha type-3 (EC 3.4.25.1) (Macropain subunit CB) (Multicatalytic endopeptidase complex subunit CB) (Proteasome component CB) (Proteasome subunit K)                                                                                                                                                                                             | Acaa2   | THIM_RAT          | -0,882236527 |             | 0,07146997 | -12,344157 | 168  |         |              |
| P18422  | Peptidyl-prolyl cis-trans isomerase B (P-Plase B) (EC 5.2.1.8) (CYP-51) (Cyclophilin B) (Rotanase B) (5-cyclophilin) (SCYLP)                                                                                                                                                                                                                                        | Pma3    | PSA3_RAT          | -4,304068385 |             | 0,09205354 | -46,75614  | 104  |         |              |
| P24368  | Pyruvate dehydrogenase E1 component subunit alpha, somatic form, mitochondrial (EC 1.2.4.1) (PDH-E1 type I)                                                                                                                                                                                                                                                         | Ppib    | PIIB_RAT          | -1,431301824 |             | 0,08693548 | -16,463955 | 99   |         |              |
| P26284  | Hypoxanthine-guanine phosphoribosyltransferase (HGPRTase) (EC 2.4.2.8)                                                                                                                                                                                                                                                                                              | Pdhal   | ODPA_RAT          | -0,813234733 |             | 0,08563672 | -9,4963323 | 419  |         |              |
| P27605  | Dynactin subunit 1 (150 kDa dynein-associated polypeptide) (DAP-150) (DP-150) (p150-glued)                                                                                                                                                                                                                                                                          | Hprt1   | HPRT_RAT          | -1,969194585 |             | 0,07336624 | -26,840609 | 179  |         |              |
| P28023  | 3-hydroxyisobutyrate dehydrogenase, mitochondrial (HIBADH) (EC 1.1.1.31)                                                                                                                                                                                                                                                                                            | Dctn1   | DCTN1_RAT         | -0,870695974 |             | 0,05969286 | -14,586267 | 444  |         |              |
| P29266  | Leukotriene A-4 hydro lyase (LTA-4 hydro lyase) (EC 3.3.2.6) (Leukotriene A(4) hydrolase)                                                                                                                                                                                                                                                                           | Hibadh  | 3HIDH_RAT         | -1,821803001 |             | 0,12235181 | -14,889873 | 142  |         |              |
| P30349  | Ras-related protein Rab-10                                                                                                                                                                                                                                                                                                                                          | Lta4h   | LKHA4_RAT         | -0,751880219 |             | 0,05300106 | -14,186136 | 251  |         |              |
| P35281  | Cytoplasmic dynein 1 heavy chain 1 (Cytoplasmic dynein heavy chain 1) (Dynein heavy chain, cytosolic) (MAP1C)                                                                                                                                                                                                                                                       | Rab10   | RAB10_RAT         | -1,897923999 |             | 0,10398805 | -18,251367 | 58   |         |              |
| P38650  | Cytosolic NADP-isocitrate dehydrogenase (IDH) (EC 1.1.1.42) (Cytosolic NADP-isocitrate dehydrogenase) (IDP) (NADP(+)-specific ICDH) (Oxalosuccinate decarboxylase)                                                                                                                                                                                                  | Dnchl0  | DYHCl_RAT         | -0,401498078 |             | 0,0297316  | -13,504084 | 2339 |         |              |
| P41562  | ATP-dependent 6-phosphofructokinase, muscle type (ATP-PFK) (PFK-M) (EC 2.7.1.11) (6-phosphofructokinase type A) (Phosphofructo-1-kinase isozyme A) (PFK-A) (Phosphohexokinase)                                                                                                                                                                                      | ldhl    | IDHC_RAT          | -0,887248369 |             | 0,09088786 | -9,7620118 | 368  |         |              |
| P47858  | Annexin A6 (Annexin VI) (Annexin-6) (Calcium-binding protein 65/67) (CBP 65/67)                                                                                                                                                                                                                                                                                     | Pfk-m   | PFKAM_RAT         | -0,964282021 |             | 0,08735507 | -11,038649 | 423  |         |              |
| P48037  | 60S ribosomal protein L4 (60S ribosomal protein L1)                                                                                                                                                                                                                                                                                                                 | Anxa6   | ANXA6_RAT         | -0,871593341 |             | 0,05142861 | -16,947636 | 680  |         |              |
| P50878  | Ras-related protein Rab-4B                                                                                                                                                                                                                                                                                                                                          | Rpl4    | RL4_RAT           | -2,158034132 |             | 0,07953625 | -27,13271  | 55   |         |              |
| P51146  | Ras-related protein Rab-14                                                                                                                                                                                                                                                                                                                                          | Rab4b   | RAB4B_RAT         | -1,867074322 |             | 0,1068527  | -17,473347 | 73   |         |              |
| P61107  | 26S protease regulatory subunit 4 (P26s4) (26S proteasome AAA-ATPase subunit RPT2) (Proteasome 26S subunit ATPase 1)                                                                                                                                                                                                                                                | Rab14   | RAB14_RAT         | -0,908661026 |             | 0,0973764  | -9,3314295 | 250  |         |              |
| P62193  | Geranylgeranyl transferase type-2 subunit alpha (EC 2.5.1.60) (Geranylgeranyl transferase type II subunit alpha) (Rab geranylgeranyl transferase subunit alpha) (Rab GG transferase alpha) (Rab GGTase alpha) (Rab geranylgeranyl transferase subunit alpha)                                                                                                        | Psmc1   | PRS4_RAT          | -1,122195028 |             | 0,09087523 | -12,348744 | 147  |         |              |
| Q08602  | UPF0587 protein Clorf123 homolog                                                                                                                                                                                                                                                                                                                                    | Rabgta  | GGTA_RAT          | -0,676874953 |             | 0,06077722 | -11,136985 | 191  |         |              |
| Q498R7  | UV excision repair protein RAD23 homolog B                                                                                                                                                                                                                                                                                                                          | CA123   | CA123_RAT         | -2,221915385 |             | 0,09304396 | -23,880274 | 30   |         |              |
| Q4KMA2  | Protein phosphatase 1 regulatory subunit 7 (Protein phosphatase 1 regulatory subunit 22)                                                                                                                                                                                                                                                                            | Rad23b  | RD23B_RAT         | 1,962226805  |             | 0,11497222 | 17,0669642 | 63   |         |              |
| Q5HZV9  | Twinfilin-1                                                                                                                                                                                                                                                                                                                                                         | Ppp1r7  | Sds22 PP1R7_RAT   | -0,803745626 |             | 0,05917421 | -13,582702 | 270  |         |              |
| Q5RJR2  | Ubiquitin-like modifier-activating enzyme 1 (Ubiquitin-activating enzyme E1)                                                                                                                                                                                                                                                                                        | Twfl    | Ptk9 TWFL_RAT     | -1,170523566 |             | 0,07656887 | -15,287199 | 119  |         |              |
| Q5U300  | Major vault protein (MVP)                                                                                                                                                                                                                                                                                                                                           | Ubal    | UBAL_RAT          | -0,643963036 |             | 0,05858279 | -10,992359 | 659  |         |              |
| Q62667  | Nuclear migration protein nude (Nuclear distribution protein C homolog) (c15)                                                                                                                                                                                                                                                                                       | Mvp     | MVP_RAT           | -0,890462113 |             | 0,06497203 | -13,705314 | 152  |         |              |
| Q63525  | Plastin-3 (T-plastin)                                                                                                                                                                                                                                                                                                                                               | Nude    | NUDC_RAT          | -0,970424587 |             | 0,08849056 | -10,966419 | 201  |         |              |
| Q63598  | UPF0160 protein MYG1, mitochondrial 1                                                                                                                                                                                                                                                                                                                               | Pls3    | PLST_RAT          | -1,797176968 |             | 0,07403173 | -24,275767 | 327  |         |              |
| Q641W2  | Calpain small subunit 1 (CSS1) (Calcium-activated neutral proteinase small subunit) (CANP small subunit) (Calcium-dependent proteinase small subunit) (COPS) (Calcium-dependent protease small subunit 1) (Calpain small subunit)                                                                                                                                   | 11ygl   | C12orf1 MYG1_RAT  | -2,292223596 |             | 0,08842302 | -25,923381 | 42   |         |              |
| Q64537  | Calpain small subunit 1 (CSS1) (Calcium-activated neutral proteinase small subunit) (CANP small subunit) (Calcium-dependent proteinase small subunit) (COPS) (Calcium-dependent protease small subunit 1) (Calpain small subunit)                                                                                                                                   | msl     | Capn4 C CPNS1_RAT | -1,008948593 |             | 0,10565995 | -9,5490165 | 135  |         |              |
| Q75Q39  | Mitochondrial import receptor subunit TOM70 (Mitochondrial precursor proteins import receptor) (Translocase of outer membrane 70 kDa subunit)                                                                                                                                                                                                                       | Tomm70a | TOM70_RAT         | -2,622044683 |             | 0,1588691  | -16,504435 | 44   |         |              |
| Q80Z30  | Protein phosphatase 1E (EC 3.1.3.16) (Ca(2+)-calmodulin-dependent protein kinase phosphatase N) (CaMKP-N) (CaMKP-nucleus) (CaMKN) (Partner of PIX1) (Partner of PIX-alpha) (Partner of PIXA)                                                                                                                                                                        | pmle    | Camkr PPMIE_RAT   | 3,033463252  |             | 0,12027047 | 25,2220114 | 31   |         |              |
| Q8VHF5  | Citrate synthase, mitochondrial 1 (EC 2.3.3.1) (Citrate synthase)                                                                                                                                                                                                                                                                                                   | Cs      | CISY_RAT          | -1,184299439 |             | 0,08651213 | -13,689403 | 162  |         |              |
| Q8VHU4  | Elongator complex protein 1 (ELP1) (IkappaB kinase complex-associated protein) (IKK complex-associated protein)                                                                                                                                                                                                                                                     | bkap    | Elpl1k ELPI_RAT   | -2,273872952 |             | 0,09120203 | -24,932262 | 32   |         |              |
| Q8VIO4  | Isoaspartyl peptidase / L-asparaginase (EC 3.4.19.5) (EC 3.5.1.1) (Asparaginase-like protein 1) (Asparaginase-like sperm autoantigen) (Beta-aspartyl-peptidase) (Glial asparaginase) (Isoaspartyl dipeptidase) (L-asparagine amidohydrolyase) [Cleaved into: Isoaspartyl peptidase / L-asparaginase alpha chain; Isoaspartyl peptidase / L-asparaginase beta chain] | Alp     | Gliap ASGLI_RAT   | -0,706488669 |             | 0,06361015 | -11,10654  | 180  |         |              |
| Q9ESB5  | N-terminal EF-hand calcium-binding protein 1 (EF-hand calcium-binding protein 1) (Neuronal calcium-binding protein 1) (Synaptotagmin-interacting protein 1) (Stip-1)                                                                                                                                                                                                | cabl    | Efcblp NECA1_RAT  | 5,742156428  |             | 0,05986842 | 95,9129505 | 11   |         |              |
| Q9QXQ0  | Alpha-actinin-4 (F-actin cross-linking protein) (Non-muscle alpha-actinin 4)                                                                                                                                                                                                                                                                                        | Actn4   | ACTN4_RAT         | -0,963209148 |             | 0,05736175 | -16,791836 | 374  |         |              |
| Q9WU06  | Avillin (Peripheral nervous system villin-like protein) (Pervin)                                                                                                                                                                                                                                                                                                    | Avil    | AVIL_RAT          | 1,712477336  |             | 0,04285966 | 39,9554606 | 86   |         |              |
| 035832  | Cyclin-dependent kinase 18 (EC 2.7.11.22) (Cdk11 division protein kinase 18) (PCTAI RE-motif protein kinase 3) (Serine/threonine kinase 18 Petaire3 PCKD18) (PCTAIRE-3)                                                                                                                                                                                             | Pctai3  | Pc CKD18_RAT      | -3,035012572 |             | 0,202468   | -14,990086 | 40   |         |              |
| 054975  | Xaa-Pro aminopeptidase 1 (EC 3.4.11.9) (Aminoacylproline aminopeptidase) (Cytosolic aminopeptidase P) (Soluble aminopeptidase P) (sAmp) (X-Pro aminopeptidase 1) (X-prolyl aminopeptidase 1, soluble) [Cleaved into: Xaa-Pro aminopeptidase 1, N-terminally processed]                                                                                              | Xpnpepl | App XPPI_RAT      | -0,960815694 |             | 0,08423602 | -11,406233 |      |         |              |



|         |                                                                                                                                                                                                                                          |                |              |              |            |            |     |
|---------|------------------------------------------------------------------------------------------------------------------------------------------------------------------------------------------------------------------------------------------|----------------|--------------|--------------|------------|------------|-----|
| P02770  | Serum albumin                                                                                                                                                                                                                            | Alb            | ALBU_RAT     | 0,738372087  | 0,060207   | 12,2638916 | 548 |
| P05708  | Hexo kinase -1 (EC 2.7.1.1) (Bra in form hexok inase ) (Hexokinase type I) (HK I)                                                                                                                                                        | Hkl            | HXKI_RAT     | -0,809562732 | 0,05859809 | -13,815513 | 372 |
| P08649  | Com ple ment C4 [Cle aved in to: Complement C4 beta chain; Comp le ment C4 alpha chain; C4a anaphy latox in; Complement C4 gamma chain]                                                                                                  | C4C4a          | C04_RAT      | -0,76523277  | 0,07763929 | -9,856257  | 126 |
| P19139  | Casein kinase II subunit alpha (CK II alpha) (EC 2.7.11.1)                                                                                                                                                                               | Csnk2al        | CSK21_RAT    | -2,259309202 | 0,10057301 | -22,46437  | 134 |
| P23514  | Coatomer subunit beta (Beta-coat protein) (Beta-COP)                                                                                                                                                                                     | C opbl Copb    | COPB_RAT     | -3,758 15657 | 0,12848663 | -29,249399 | 65  |
| P25093  | Fum arylacetacetase (FAA) (EC 3.7.1.2) (Be ta-d-ike to nase )                                                                                                                                                                            | Fah            | FAAA_RAT     | 2,943395967  | 0,07453284 | 39,491265  | 38  |
| P27952  | {Fum arylacetacetate hydro lase }<br>405 ribosomal protein 52                                                                                                                                                                            | Rps2           | RS2_RAT      | -1,431678329 | 0,10145487 | -14,111479 | 84  |
| P30713  | Glu tathione 5-transferase theta -2 (EC 2.5.1.18) (GST class- theta -2) (Glutathione 5-transferase 12) (G1utath ione 5-transferase Yrs- Yrs)                                                                                             | Gstt2          | GSTT2_RAT    | -2,052793962 | 0,13208336 | -15,541655 | 44  |
| P63029  | Translation ally-contro lled tumor protein (TCTP) (Lens epithelial protein)                                                                                                                                                              | Tptl Trt       | TCTP_RAT     | -1,869054341 | 0,11354997 | -16,460192 | 92  |
| P63047  | Sulfotrans fe rase 4A1 (ST4A1) (EC 2.8.2.-) (Bra in sulfotransferase-like protein) (rBR-STL) (Nervous system sulfotrans fe rase) (NST)                                                                                                   | Sult4al Sultx3 | ST4A1_RAT    | -1,818396947 | 0,11699982 | -15,541879 | 97  |
| P80299  | Bifunctional epoxide hydrolase 2 [Includes: Cytosolic epoxide hydrolase 2 (CEH) (EC 3.3.2.10) (Epoxide hydratase ) (Soluble epoxide hydrolase) (SEH); lipid-phosphate phosphatase (EC 3.1.3.76)]                                         | Ephx2          | HYES_RAT     | -4,339620517 | 0,15236915 | -28,480966 | 23  |
| Q00981  | Ubiquitin carboxy l-termina l hydrolase isozyme L1 (UCH-L1) (EC 3.4.19.12) (EC 6.-.-.-) (Ne urocytoplasmic protein 9.5) (PGP 9.5) (PGP9.5) (Ubiquitin thioesterase L1)                                                                   | Uchl1          | UCHL1_RAT    | -1,243175877 | 0,10637935 | -11,686252 | 353 |
| Q02253  | Met hylmalonate-sem ialdehyde dehydrogenase (acylating), mitochondrial (MMSDH) [Malonate-semialdehyde dehydrogenase [acylating]] (EC 1.2.1.18) (EC 1.2.1.27) (Aldehyde dehydrogenase family 6 member A1)                                 | ldh6al Mmsd    | MMSA_RAT     | -1,694679321 | 0,08972105 | -18,888315 | 179 |
| Q4QQT4  | Serine/ threonine- protein phosphatase 2A 65 kDa regulatory subunit A beta isoform [PP2A subunit A isoform PR65-beta) (PP2A subunit A isoform RI-beta)                                                                                   | Ppp2r1b        | 2AAB_RAT     | -3,361818517 | 0,10473686 | -32,097759 | 56  |
| QXSX172 | Eukaryotic translation initiation factor 4H {eIF-4H) (Williams-Beuren syndrome chromosomal region 1 protein homolog)                                                                                                                     | Eif4hWbscr1    | IF4H_RAT     | 1,806000744  | 0,08835017 | 20,4413961 | 92  |
| Q63570  | 26S protease regulator y subunit 6B (26S proteasome AAA-ATPase subunit RPT3) (Proteasome 26S subunit ATPase 4) (56 ATPase) (Tat- binding protein in 7) (TBP-7)                                                                           | Psmc4 Tbp7     | PRS6B_RAT    | -1,376584101 | 0,10541375 | -13,058867 | 115 |
| Q7TP36  | Protein Shroom2 {liver regeneration-related protein LRRG167 ) (Protein Apx1)                                                                                                                                                             | omf Apxl       | Ab SHRMI_RAT | 2,580532516  | 0,10061334 | 25,6480165 | 56  |
| Q8K4K5  | Lethal(2) giant larvae protein homolog 1 (LLGL) (Rgl-1)                                                                                                                                                                                  | Llgll Rgll     | L2Gll_RAT    | -1,674884845 | 0,07461708 | -22,446401 | 55  |
| Q8R491  | EHD domain-containing protein 3                                                                                                                                                                                                          | Ehd3 Ehd2      | EHD3_RAT     | -1,896633875 | 0,15980057 | -11,868755 | 59  |
| Q9Z1B2  | Glutathione 5-transferase Mu 5 (EC 2.5.1.18) (GST class-mu 5) Phosphoribosyl pyrophosphate synthase-associated protein 2 (PRPP synthase-associated protein 2) (41 kDa phosphoribosylpyrophosphate synthetase-associated protein) (PAP41) | Gstm5          | GSTMS_RAT    | -1,309279271 | 0,13403977 | -9,7678419 | 180 |
| 008618  |                                                                                                                                                                                                                                          | Prpsap2        | KPRB_RAT     | -1,110105689 | 0,09646208 | -11,508208 | 111 |
| P05370  | Glucose-6- phosphate 1-dehydrogenase (G6PD) (EC 1.1.1.49)                                                                                                                                                                                | G6pdx G6pd     | G6PD_RAT     | -0,616559064 | 0,05941486 | -10,377185 | 291 |
| P07943  | Aldehyde reductase (AR) (EC 1.1.1.21) (Aldehyde reductase)                                                                                                                                                                               | lhl Aklrlb4    | ALDR_RAT     | -1,046278383 | 0,07953282 | -13,155303 | 341 |
| P13697  | NADP-dependent malic enzyme (N: P-ME) (EC 1.1.1.40) (Malic enzyme class 1)                                                                                                                                                               | Mod-1 Mo       | MAOX_RAT     | -1,612975649 | 0,06218644 | -25,937738 | 271 |
| P39069  | Adenylate kinase isozyme 1 (AK I) (EC 2.7.4.3) (EC 2.7.4.6) (ATP-AMP transphosphorylation 1) (ATP:AMP phosphotransferase) (Adenylate monophosphate kinase) (Myokinase)                                                                   | Akl            | KADI_RAT     | -1,41198902  | 0,11229544 | -12,573877 | 281 |
| P47709  | Raph3-like protein 3A (Exophilin-1)                                                                                                                                                                                                      | Rph3a          | RP3A_RAT     | -0,777375672 | 0,06525064 | -11,913686 | 183 |
| P53534  | Glycogen phosphorylase, brain form (EC 2.4.1.1) (Fragment) 60 kDa heat shock protein, mitochondria 1 (60 kDa chaperonin) {Chaperonin 60} (CPN60) {HSP-65} (Heat shock protein 60) (HSP-60) {Hsp60} (Mitochondrial matrix protein in P1)  | Pygb           | PYGB_RAT     | -0,748946083 | 0,07181354 | -10,429037 | 658 |
| P63039  |                                                                                                                                                                                                                                          | Hspdl Hsp60    | CH60_RAT     | -0,995881845 | 0,07377091 | -13,499654 | 645 |
| P70619  | Glutathione reductase (GR) (GRase) (EC 1.8.1.7) (Fragment)                                                                                                                                                                               | Gs,            | GSHR_RAT     | -2,724204813 | 0,09701889 | -28,079116 | 42  |
| P85973  | Purine nucleoside phosphorylase (PNP) (EC 2.4.2.1) (Inosine phosphorylase) (Inosine-guanosine phosphorylase)                                                                                                                             | Pnp Np         | PNPH_RAT     | -1,581606045 | 0,08106042 | -19,511446 | 190 |
| Q3KRD5  | Mitochondrial import receptor subunit TOM34 {Translocase of outer membrane 34 kDa subunit)                                                                                                                                               | Tomm34         | TOM34_RAT    | -1,328849333 | 0,07799808 | -17,03695  | 116 |
| QXSX10  | Mammalian ependymin-related protein 1 (MERP-1)                                                                                                                                                                                           | Eprd2 Merpl    | EPDRI_RAT    | -3,904997455 | 0,10763486 | -36,280046 | 48  |
| Q63450  | Calcium/calmodulin-dependent protein kinase type I (EC 2.7.11.17) {CaM kinase I} {CaM-KI} {CaM kinase I alpha} {CaMKI-alpha}                                                                                                             | Camkl          | KCCIA_RAT    | -1,893110052 | 0,09070432 | -20,871223 | 67  |
| Q63560  | Microtubule-associated protein 6 {MAP-6} (145-kDa STOP) (STOP145) {Stable tubule-only polypeptide} (STOP)                                                                                                                                | Map6 Mtap6     | MAP6_RAT     | 0,796222264  | 0,05851883 | 13,6062567 | 280 |
| Q64640  | Adenosine kinase (AK) (EC 2.7.1.20) (Adenosine 5'-phosphotransferase) Glutaredoxin-3 {PKC-interacting cousin of thiorodoxin} (PICOT) (PKC-the thiol-interacting protein) {PKC-interacting protein} (Thiorodoxin-like protein 2)          | Adk            | ADK_RAT      | -1,592044315 | 0,07436983 | -21,407124 | 106 |
| Q9JLZ1  |                                                                                                                                                                                                                                          | Irx3 PicotTxn  | GLRX3_RAT    | -2,730736099 | 0,2082629  | -13,111966 | 54  |
| P14669  | Annexin A3 (35-alpha calcimedin) (Annexin III) (Annexin-3) (lipocortin III) {Placental anticoagulant protein III} (PAP-III)                                                                                                              | Anxa3 Anx3     | ANXA3_RAT    | -0,766928983 | 0,0729536  | -10,512558 | 446 |
| P20717  | Protein-arginine deiminase type-2 (EC 3.5.3.15) {Peptidylarginine deiminase II} (Protein-arginine deiminase type II)                                                                                                                     | Iad2 Pdi       | PADI2_RAT    | -1,162935017 | 0,12172523 | -9,5537712 | 326 |
| P22062  | Protein-L-isoaspartate (D-aspartate) O-methyltransferase (PIMT) (EC 2.1.1.77) (L-isoaspartyl protein carboxyl methyltransferase) (Protein-L-isoaspartyl/O-aspartyl methyltransferase) (Protein-beta-aspartate methyltransferase)         | Pcm1l          | PIMT_RAT     | -1,18925548  | 0,08402155 | -14,154172 | 241 |
| P27139  | Carbonic anhydrase 2 (EC 4.2.1.1) (Carbonate dehydratase II) (Carbonic anhydrase II) {CA-II}                                                                                                                                             | Ca2            | CAH2_RAT     | -1,739342176 | 0,10123354 | -17,181482 | 260 |
| P47860  | ATP-dependent 6-phosphofructokinase, platelet type (ATP-PFK) (PFK-P) (EC 2.7.1.11) (6-phosphofructokinase type C) (Phosphofructokinase isozyme C) {PFK-C} (Phosphohexokinase)                                                            | Pfkp Pfk       | PFKAP_RAT    | -0,523227542 | 0,05643593 | -9,2711782 | 728 |
| P50399  | Rab GDP dissociation inhibitor or beta (Rab GDI beta) (GDI-3) (Guanosine diphosphate dissociation inhibitor 2) {GDI-2}                                                                                                                   | Gdi2 Gdi3      | GDI B_RAT    | -1,452589745 | 0,07944798 | -18,283533 | 455 |
| P53042  | Serine/threonine-protein phosphatase 5 (PPS) (EC 3.1.3.16) (Protein phosphatase T) (PPT)                                                                                                                                                 | Ppp5c          | PPPS_RAT     | -1,647186071 | 0,10050081 | -16,389779 | 120 |
| Q01205  | Dihydrolypoyllysine-residue succinyltransferase component of 2-oxoglutarate dehydrogenase complex, mitochondria 1 (EC 2.3.1.61) (2-oxoglutarate dehydrogenase complex component E1) (OGDC-E2)                                            | Dist           | 0002_RAT     | 1,556025115  | 0,06149978 | 25,3013105 | 133 |
| Q05175  | Dihydrolypoyllysine-residue succinyltransferase component of 2-oxoglutarate dehydrogenase complex (E2K)                                                                                                                                  |                |              |              |            |            |     |
| Q2TL32  | Brain acid-soluble protein 1 (22 kDa neuronal tissue-enriched acidic protein) (Neuronal axonal membrane protein NAP-22)                                                                                                                  | Baspl Nap22    | BASPI_RAT    | 0,886550806  | 0,07739979 | 11,4541766 | 212 |
| QSM9G3  | E3 ubiquitin-protein ligase UBR4 (EC 6.3.2.-) (N-recognition-4) (Zinc finger UBR1-type protein in 1)                                                                                                                                     | -4 Rbaf600     | ZU UBR4_RAT  | -1,221924852 | 0,09614133 | -12,709673 | 133 |
| QSRJQ4  | Caprin-1 (Cytoplasmic activation- and proliferation-associated protein 1) {GPI-anchored protein p137} (GP1-p137) (p137 GP1) (RNA granule protein n1) (Gpiapl Rn CAPRI_RAT)                                                               | Gpiapl Rn      | CAPRI_RAT    | -1,989308809 | 0,15187522 | -13,098311 | 52  |
| Q63270  | NAO-dependent protein deacetylase sirutin-2 (EC 3.5.1.-) (Regulatory protein SIR2 homolog 2) (SIR2-like protein 2)                                                                                                                       | Sirt2 Sir212   | SIR2_RAT     | -0,9656565   | 0,08107365 | -11,910854 | 189 |
| Q6AY84  | Cytoplasmic aconitate hydratase (Aconitase) (EC 4.2.1.3) (Citrate hydrolyase) {Iron regulator y protein 1} (IRP1) {Iron-responsive element-binding protein 1} {IRE-BP1}                                                                  | col Ireb1 Iret | ACOC_RAT     | -1,22318507  | 0,09592009 | -12,752126 | 191 |
|         | Secernin-1                                                                                                                                                                                                                               | Scrn1          | SCRNI_RAT    | -0,845257181 | 0,09002042 | -9,389616  | 342 |

|        |                                                                                                                                                                                                                                                                                                                                                                                                          |                  |            |              |            |            |     |                   |
|--------|----------------------------------------------------------------------------------------------------------------------------------------------------------------------------------------------------------------------------------------------------------------------------------------------------------------------------------------------------------------------------------------------------------|------------------|------------|--------------|------------|------------|-----|-------------------|
| Q9ER24 | Ataxin-10 (Neuroligin 1 beta-catenin-like protein) (Spinocerebellar ataxia type 10 protein homolog)                                                                                                                                                                                                                                                                                                      | Atxn10 ScalO     | ATXIO_RAT  | -3,173992751 | 0,20981817 | -15,127349 | 47  |                   |
| P47728 | Calretinin (CR)                                                                                                                                                                                                                                                                                                                                                                                          | Calb2            | CALB2_RAT  | -1,019814238 | 0,07525422 | -13,551588 | 480 |                   |
| Q68FR6 | Elongation factor 1-gamma (EF-1-gamma) (e EF-1B gamma)                                                                                                                                                                                                                                                                                                                                                   | Eef1g            | EF1G_RAT   | -0,790054942 | 0,08148691 | -9,6954826 | 314 |                   |
| Q6AYC4 | Macrophage-capping protein (Actin regulatory protein CAP-G)                                                                                                                                                                                                                                                                                                                                              | Capg             | CAPG_RAT   | -0,936082129 | 0,07667609 | -12,208266 | 101 |                   |
| Q99N27 | Sorting nexin-1                                                                                                                                                                                                                                                                                                                                                                                          | Snx1             | SNX1_RAT   | -1,532844996 | 0,06271155 | -24,442785 | 88  |                   |
| A0JPM9 | Eukaryotic translation initiation factor 3 subunit J (eIF3j) (Eukaryotic translation initiation factor 3 subunit 1) (eIF-3-alpha) (eIF3 p35)                                                                                                                                                                                                                                                             | Eif3j Eif3sl     | EIF3J_RAT  | -3,109745972 | 0,07891836 | -39,404596 | 42  |                   |
| P04631 | Protein S100-B (S-100 protein beta chain) (S-100 protein subunit beta) (S100 calcium-binding protein B)                                                                                                                                                                                                                                                                                                  | S100b            | S100B_RAT  | -4,578924542 | 0,36453595 | -12,560846 | 57  |                   |
| P10760 | Adenosylhomocysteinase (AdoHcyase) (EC 3.3.1.1) (S-adenosyl-L-homocysteine hydrolase)                                                                                                                                                                                                                                                                                                                    | Ahcy             | SAHH_RAT   | -1,273912679 | 0,10614673 | -12,001431 | 180 |                   |
| P85968 | 6-phosphogluconate dehydrogenase, decarboxylating (EC 1.1.1.44)                                                                                                                                                                                                                                                                                                                                          | Pgd              | 6PGD_RAT   | -1,007379197 | 0,10205309 | -9,8711289 | 194 |                   |
| Q5XHY5 | Threonine-tRNA ligase, cytoplasmic (EC 6.1.1.3) (Threonyl-tRNA synthetase) (ThrRS)                                                                                                                                                                                                                                                                                                                       | Tars             | SYTC_RAT   | -1,678514378 | 0,07321089 | -22,927113 | 105 |                   |
| Q6BB18 | Ubiquitin-like domain-modifying enzyme 1 (Ufm1-conjugating enzyme 1)                                                                                                                                                                                                                                                                                                                                     | Ufc1             | UFC1_RAT   | -3,662171432 | 0,13062113 | -28,036593 | 33  |                   |
| Q91X3  | Bis(S'-adenosyl)-tri-phosphatase (EC 3.6.1.29) (AP3A hydrolase) (AP3Aase) (Diadenosine 5',5''-P1,P3-triphosphate hydrolase)                                                                                                                                                                                                                                                                              | Fhit             | FHIT_RAT   | -4,330556377 | 0,09043208 | -47,88739  | 32  |                   |
| 008697 | (Dinucleoside triphosphatase) (Fragile histidine triad protein) ADP-ribosylation factor-like protein 2                                                                                                                                                                                                                                                                                                   | Arl2 Arl184      | ARL2_RAT   | -1,396935684 | 0,09861091 | -14,166137 | 74  |                   |
| Q04631 | Protein farnesyl transferase type-1 subunit alpha (EC 2.5.1.58) (EC 2.5.1.59) (CAAX farnesyl transferase subunit alpha) (Frase-alpha) (Ras proteins prenyl transferase subunit alpha) (Type I protein geranylgeranyl transferase subunit alpha) (GGTase-1-alpha)                                                                                                                                         | Fnta             | FNTA_RAT   | -1,955422271 | 0,08580939 | -22,787976 | 118 |                   |
| Q32PX2 | Aminoacyl-tRNA synthetase complex-interacting multifunctional protein 2 (Multisynthase complex auxiliary component p38) (Protein JTV-1)                                                                                                                                                                                                                                                                  | Aimp2 Jtv1       | AIMP2_RAT  | -3,525463241 | 0,12827725 | -27,483154 | 30  |                   |
| Q63081 | Protein disulfide-isomerase AG (EC 5.3.4.1) (Calcium-binding protein 1) (CaBP1) (Protein disulfide isomerase PS) (Thioredoxin domain-containing protein n7)                                                                                                                                                                                                                                              | Cap1l Txn        | PDIA6_RAT  | -1,207218906 | 0,09965419 | -12,114081 | 152 |                   |
| Q6PECO | Bis(S'-nucleosyl)-tetraphosphatase [asymmetrical] (EC 3.6.1.17) (Diadenosine 5',5''-P1,P4-tetraphosphate asymmetrical hydrolase) (Ap4A hydrolase) (Ap4Aase) (Diadenosine tetraphosphatase)                                                                                                                                                                                                               | Nudt2            | AP4A_RAT   | -2,383471099 | 0,21873393 | -10,896669 | 88  |                   |
| Q920J4 | (Nucleoside diphosphate-linked moiety X motif 2) (Nucleoside diphosphate-linked moiety X motif 2)                                                                                                                                                                                                                                                                                                        | Txnll Trp        | TXNLI1_RAT | -0,857289401 | 0,09330608 | -9,1879269 | 213 |                   |
| B0BN18 | Thioredoxin-like protein 1 (Thioredoxin-related protein)                                                                                                                                                                                                                                                                                                                                                 | Pfdn2            | PFD2_RAT   | -4,880011032 | 0,10909077 | -44,73349  | 35  |                   |
| P62959 | Histidine triad nucleotide-binding protein 1 (EC 3.---) (17 kDa inhibitor of protein kinase C) (Adenosine 5'-monophosphoramidase) (Protein kinase C inhibitor 1) (Protein kinase-interacting protein 1) (PKCI-1) Cyclin-dependent kinase 5 (EC 2.7.11.22) (Cdk II division protein kinase 5) (Serine/threonine-protein kinase PSSALRE) (Tau protein kinase II catalytic subunit) (TKI catalytic subunit) | int1 Hint Pkci   | HINT1_RAT  | -2,386449782 | 0,15745197 | -15,156685 | 114 |                   |
| Q03114 | Polyadenylation-binding protein 1 (PABP-1) (Poly(A)-binding protein 1)                                                                                                                                                                                                                                                                                                                                   | Jabp1 Pabpl      | PABP1_RAT  | -0,92823097  | 0,05345299 | -17,36537  | 206 |                   |
| Q9QZA2 | Programmed cell death 6-interacting protein (ALG-2-interacting protein 1)                                                                                                                                                                                                                                                                                                                                | Pdc61a Arl1      | PDIC61_RAT | -0,034056086 | 0,06213086 | -10,255407 | 332 |                   |
| Q6RUV5 | Ras-related C3 botulinum toxin substrate 1 (p21-Rac1)                                                                                                                                                                                                                                                                                                                                                    | Rael             | RAC1_RAT   | -2,477784895 | 0,16676642 | -14,857817 | 67  |                   |
| Q63468 | Phosphoribosyl pyrophosphate synthase-associated protein 1 (PRPP synthase-associated protein 1) (39 kDa phosphoribosylpyrophosphate synthase-associated protein) (PAP39)                                                                                                                                                                                                                                 | Prpsap1          | KPRA_RAT   | -1,659728354 | 0,1163728  | -14,262168 | 79  |                   |
| P04764 | Alpha-enoase (EC 4.2.1.11) (2-phosphohydro-D-glycerate hydro-lyase) (Enoase 1) (Non-neuronal enoase) (NNE)                                                                                                                                                                                                                                                                                               | Enol Eno-1       | ENOA_RAT   | -0,907142297 | 0,07437394 | -12,197045 | 425 |                   |
| Q7TP48 | Adipocyte plasma membrane-associated protein                                                                                                                                                                                                                                                                                                                                                             | pmap Ab2-3CAPMAP | ADIP_RAT   | -5,999531534 | 0,13421239 | -44,701772 | 15  |                   |
| 035509 | Ras-related protein Rab-11B                                                                                                                                                                                                                                                                                                                                                                              | Rab11b           | RB11B_RAT  | -1,247571919 | 0,05645329 | -22,099189 | 43  |                   |
| P12368 | cAMP-dependent protein kinase type II-alpha regulatory subunit                                                                                                                                                                                                                                                                                                                                           | Prkar2a          | KAP2_RAT   | -0,97586403  | 0,10763736 | -9,0662206 | 182 | 2,22E-16 2,52E-15 |
| 055043 | Rho guanine nucleotide exchange factor 7 (Beta-Pix) (PAK-interacting exchange factor beta)                                                                                                                                                                                                                                                                                                               | gef7 Pak3bp      | IARHG7_RAT | -6,297080183 | 0,08149624 | -77,268355 | 11  | 2,22E-16 2,52E-15 |
| Q497B0 | Omega-amidase NIT2 (EC 3.5.1.3) (Nitrilase homolog 2)                                                                                                                                                                                                                                                                                                                                                    | Nit2             | NIT2_RAT   | -0,889474981 | 0,08905756 | -9,9876415 | 93  | 2,22E-16 2,52E-15 |
| Q07009 | Calpain-2 catalytic subunit (EC 3.4.22.53) (Calcium-activated neutral proteinase 2) (CANP 2) (Calpain M-type) (Calpain-2 large subunit) (Milimolocalin) (M-calpain)                                                                                                                                                                                                                                      | Capn2            | CAN2_RAT   | -0,763567719 | 0,08990884 | -8,4926881 | 362 | 4,44E-16 4,89E-15 |
| Q6P7B0 | Tryptophan-tRNA ligase, cytoplasmic (EC 6.1.1.2) (Tryptophanyl-tRNA synthetase) (TrpRS) (Cleaved into: TrpRS; T2-TrpRS)                                                                                                                                                                                                                                                                                  | Wars             | SYWC_RAT   | -0,797890821 | 0,09079534 | -8,7877944 | 230 | 4,44E-16 4,89E-15 |
| 089049 | Thioredoxin reductase 1, cytoplasmic (TR) (EC 1.8.1.9) (NADPH-dependent thioredoxin reductase) (Thioredoxin reductase TR1)                                                                                                                                                                                                                                                                               | Txnrd1 Trxr1     | TRXR1_RAT  | -0,841447229 | 0,09117388 | -9,2290383 | 143 | 4,44E-16 4,89E-15 |
| P13086 | Succinyl-CoA ligase [ADP/GDP-forming] subunit alpha, mitochondrial (EC 6.2.1.4) (EC 6.2.1.5) (Succinyl-CoA synthetase subunit alpha) (SCS-alpha)                                                                                                                                                                                                                                                         | Suc1gl           | SUCA_RAT   | -1,33128011  | 0,13928523 | -9,5579415 | 109 | 4,44E-16 4,89E-15 |
| P34067 | Proteasome subunit beta type-4 (EC 3.4.25.1) (Macropain beta chain) (Multicatalytic endopeptidase complex beta chain) (Proteasome beta chain) (Proteasome chain 3) (RN3)                                                                                                                                                                                                                                 | Psmb4            | PSB4_RAT   | 1,163488715  | 0,1280272  | 9,08782447 | 137 | 8,88E-16 9,71E-15 |
| Q568Z9 | Phytanoyl-CoA hydroxylase-interacting protein (Phytanoyl-CoA hydroxylase-associated protein 1) (PAHX-A PI) (PAHXAPI)                                                                                                                                                                                                                                                                                     | Phyhip           | PHYIP_RAT  | -2,179931766 | 0,17076418 | -12,765744 | 40  | 1,11E-15 1,20E-14 |
| Q8K1P7 | Transcription activator BRG1 (EC 3.6.4.-) (ATP-dependent helicase SMARCA4) (BRG1-associated factor 190A) (BAF190A) (Protein in brahma homolog 1) (SNF2-beta) (SWI-SNF-related matrix-associated actin-dependent regulatory chromatin subfamily A member 4)                                                                                                                                               | Ifi90a Brg1      | SISMA4_RAT | -9,876761293 | 0,06077476 | -162,51419 |     | 2,22E-15 2,39E-14 |
| Q62940 | E3 ubiquitin-protein ligase NEDD4 (EC 6.3.2.-)                                                                                                                                                                                                                                                                                                                                                           | edd4 Nedd4       | NEDD4_RAT  | -0,701895982 | 0,07235714 | -9,7004388 | 83  | 2,66E-15 2,85E-14 |
| 054715 | V-type proton ATPase subunit S1 (V-ATPase subunit S1) (C7-1 protein) (V-ATPase A45 subunit) (V-ATPase S1 accessory protein) (Vacuolar proton pump subunit S1)                                                                                                                                                                                                                                            | pl At6p1 A       | VASI_RAT   | -3,519475208 | 0,13382319 | -26,299442 | 17  | 3,11E-15 3,30E-14 |
| QSUIZ0 | Rab3 GTPase-activating protein non-catalytic subunit (Rab3 GTPase-activating protein 150 kDa subunit) (Rab3-GAP p150) (Rab3-GAP regulatory subunit)                                                                                                                                                                                                                                                      | Rab3gap2         | RBGPR_RAT  | -1,529373144 | 0,119785   | -12,767652 | 36  | 6,22E-15 6,55E-14 |
| P23928 | Alpha-crystallin B chain (Alpha(B)-crystallin)                                                                                                                                                                                                                                                                                                                                                           | Cryab            | CRYAB_RAT  | -1,137573993 | 0,12802283 | -8,885712  | 111 | 1,29E-14 1,35E-13 |
| QSU2P0 | DIS3-like exonuclease 1 (EC 3.1.13.-)                                                                                                                                                                                                                                                                                                                                                                    | Dis31            | DISL1_RAT  | -1,19143243  | 0,04541783 | -26,2327   | 16  | 1,42E-14 1,48E-13 |
| P06760 | Beta-glucuronidase (EC 3.2.1.31)                                                                                                                                                                                                                                                                                                                                                                         | GusbGus          | BGLR_RAT   | -7,566850599 | 0,06255995 | -120,95358 |     | 2,44E-14 2,52E-13 |
| Q63356 | Unconventional myosin-1c (Myosin heavy chain myr3) (Unconventional myosin 1c)                                                                                                                                                                                                                                                                                                                            | Myo1c            | MYO1C_RAT  | -6,44631016  | 0,07750731 | -83,170354 |     | 2,66E-14 2,73E-13 |
| P36972 | Adenine phosphoribosyl transferase (APRT) (EC 2.4.2.7)                                                                                                                                                                                                                                                                                                                                                   | Aprt             | APTAT_RAT  | -0,789246307 | 0,09091021 | -8,6816028 | 107 | 4,84E-14 4,92E-13 |
| P50554 | 4-aminobutyrate aminotransferase, mitochondrial (EC 2.6.1.19) ((S)-3-aminobutyrate 2-methylpropanoyl transferase) (EC 2.6.1.22) (GABA aminotransferase) (GABA-AT) (Gamma-aminobutyrate aminotransferase) (GABA transaminase) (GABA-T) (L-AIBAT) (Cleaved into: 4-aminobutyrate aminotransferase, brain isoform; 4-aminobutyrate aminotransferase, liver isoform)                                         | AbatGabat        | GABT_RAT   | -0,986316056 | 0,12471619 | -7,9084848 | 286 | 5,73E-14 5,78E-13 |
| P29826 | Ran class II histocompatibility antigen, B-1 beta chain (RTI class II histocompatibility antigen, B-1 beta chain) (RTI-B-beta1)                                                                                                                                                                                                                                                                          | RTI-Bb           | HB2B_RAT   | -7,151949199 | 0,07197182 | -99,371515 |     | 1,17E-13 1,18E-12 |
| P13635 | Ceruloplasmin (EC 1.16.3.1) (Ferroxidase)                                                                                                                                                                                                                                                                                                                                                                | Cp               | CERU_RAT   | 0,631375185  | 0,07911378 | 7,98059648 | 193 | 1,27E-13 1,26E-12 |
| P62198 | 26S protease regulatory subunit 8 (26S proteasome AAA-ATPase subunit RPT6) (Proteasome 26S subunit ATPase 5) (Proteasome subunit p45) (Thyroid hormone receptor-interacting protein 1) (TRIP1) (p45/SUG)                                                                                                                                                                                                 | Psmc5 Sugl       | PRS8_RAT   | -1,412786124 | 0,16535533 | -8,5439407 | 100 | 1,51E-13 1,50E-12 |
| P17425 | Hydroxymethylglutaryl-CoA synthase, cytoplasmic (HMG-CoA synthase) (EC 2.3.3.10) (3-hydroxy-3-methylglutaryl coenzyme A synthase)                                                                                                                                                                                                                                                                        | mgcs1 Hmgcs      | HMCST_RAT  | -0,777877291 | 0,0985199  | -7,8956359 | 212 | 1,54E-13 1,51E-12 |

|            |                                                                                                                                                                                                                                                                                                                                                                                                      |               |             |              |            |            |      |          |          |
|------------|------------------------------------------------------------------------------------------------------------------------------------------------------------------------------------------------------------------------------------------------------------------------------------------------------------------------------------------------------------------------------------------------------|---------------|-------------|--------------|------------|------------|------|----------|----------|
| Q6AY30     | Saccharopine dehydrogenase-like oxidoreductase (EC 1.-.-.-)                                                                                                                                                                                                                                                                                                                                          | Scepdh        | SCPDL_RAT   | -3,077332377 | 0,24919465 | -12,349111 | 31   | 1,66E-13 | 1,62E-12 |
| Q3MIE0     | Enoyl-CoA hydratase domain-containing protein 3, mitochondrial                                                                                                                                                                                                                                                                                                                                       | Echdc3        | ECHD3_RAT   | 1,527663838  | 0,06957431 | 21,9572988 | 16   | 2,26E-13 | 2,19E-12 |
| P85515     | Alpha-centractin (Contractin)                                                                                                                                                                                                                                                                                                                                                                        | Actrla Ctrml  | ACTZ_RAT    | -0,922650968 | 0,11768982 | -7,8396835 | 203  | 2,50E-13 | 2,41E-12 |
| P30835     | ATP-dependent 6-phosphofructokinase, liver type (ATP-PFK) (PFK-L) (EC 2.7.1.11) (6-phosphofructokinase type B) (P-phosphofructo-1-kinase isozyme B) (PFK-B) (Phosphohexokinase)                                                                                                                                                                                                                      | PfkI Pfk-l    | PFKAL_RAT   | -1,008991658 | 0,12140212 | -8,3111536 | 107  | 3,24E-13 | 3,10E-12 |
| P16086     | Spectrin alpha chain, non-erythrocytic (Alpha-II spectrin) (Fodrin alpha chain) (SPTNL1) (SPTNL1_RAT)                                                                                                                                                                                                                                                                                                |               |             | 0,226764238  | 0,03113741 | 7,28269492 | 1298 | 5,66E-13 | 5,37E-12 |
| P47942     | Dihydropyrimidinase-related protein 2 (DRP-2) (Collapsin response mediator protein 2) (CRMP-2) (Turned on after division 64 kDa protein) (TOAD-64)                                                                                                                                                                                                                                                   | Dpysl2        | DPYL2_RAT   | -0,810287357 | 0,11043395 | -7,3373032 | 712  | 5,96E-13 | 5,62E-12 |
| Q9QUL6     | Vesicle-fusing ATPase (EC 3.6.4.6) (N-ethylmaleimide-sensitive fusion protein) (NEM-sensitive fusion protein) (Vesicular fusion protein NSF) (Hsp90 co-chaperone Cdc37) (Hsp90 chaperone protein kinase regulator subunit) (p50Cdc37) [Cleaved into: Hsp90 co-chaperone Cdc37, N-terminally processed]                                                                                               | Nsf Ergl      | NSF_RAT     | -0,419265922 | 0,05734809 | -7,3108965 | 821  | 6,30E-13 | 5,91E-12 |
| Q63692     | Hsp90 co-chaperone Cdc37 (Hsp90 chaperone protein kinase regulator subunit) (p50Cdc37) [Cleaved into: Hsp90 co-chaperone Cdc37, N-terminally processed]                                                                                                                                                                                                                                              | Cdc37         | CDC37_RAT   | 0,561641404  | 0,07397452 | 7,59236244 | 246  | 6,51E-13 | 6,07E-12 |
| P63329     | Serine/threonine-protein phosphatase 2B catalytic subunit alpha isoform (EC 3.1.3.16) (CAM-PRP catalytic subunit) (Calmodulin-dependent calcineurin A subunit alpha isoform)                                                                                                                                                                                                                         | Ppp3ca CaIna  | PP2BA_RAT   | 7,784460359  | 0,06528101 | 119,245406 |      | 7,69E-13 | 7,11E-12 |
| P85125     | Polymerase I and transcript release factor (Cavin-1) (cav-p60)                                                                                                                                                                                                                                                                                                                                       | Ptrf          | PTRF_RAT    | -0,795057448 | 0,04028297 | -19,736811 | 16   | 1,17E-12 | 1,08E-11 |
| P00564     | Creatine kinase M-type (EC 2.7.3.2) (Creatine kinase M chain) (M-CK) (1-phosphatidylinositol 4,5-bisphosphate phosphodiesterase beta-1) (EC 3.1.4.11) (PLC-154) (Phosphoinositide phospholipase C-beta-ta-1) (Phospholipase C-1) (PLC-I) (Phospholipase C-beta-1) (PLC-beta-1)                                                                                                                       | Ckm Ckmm      | KCRM_RAT    | 0,674577865  | 0,06066506 | 11,1197098 | 32   | 1,59E-12 | 1,45E-11 |
| P10687     | Pyridoxal kinase (EC 2.7.1.35) (Pyridoxine kinase)                                                                                                                                                                                                                                                                                                                                                   | Plcbl         | PLCBI_RAT   | -1,735846585 | 0,17254952 | -10,059991 | 40   | 1,62E-12 | 1,47E-11 |
| Q35331     | Proteasome activator complex subunit 2 (11S regulator complex subunit beta) (REG-beta) (Activator of multicatalytic protease subunit 2) (Proteasome activator 28 subunit beta) (PA28b) (PA28beta)                                                                                                                                                                                                    | Pdxk Pkh      | PDXK_RAT    | -0,71192295  | 0,09644173 | -7,3818971 | 289  | 1,67E-12 | 1,51E-11 |
| Q63798     | Sodium/potassium-transporting ATPase subunit alpha-3 (Na <sup>+</sup> /K <sup>+</sup> )                                                                                                                                                                                                                                                                                                              | Psme2         | PSME2_RAT   | -6,444387388 | 0,15739409 | -40,944277 | 10   | 1,81E-12 | 1,62E-11 |
| P06687     | ATPase alpha-3 subunit (EC 3.6.3.9) (Na <sup>+</sup> /K <sup>+</sup> ) (ATPase alpha(III) subunit) (Sodium pump subunit alpha-3)                                                                                                                                                                                                                                                                     | Atpla3        | ATIA3_RAT   | 0,422779867  | 0,05934403 | 7,12421925 | 815  | 2,30E-12 | 2,05E-11 |
| P46844     | Biliverdin reductase A (BVR A) (EC 1.3.1.24) (Biliverdin-IX alpha-reductase)                                                                                                                                                                                                                                                                                                                         | Blvra Blvr    | BIEA_RAT    | 1,049075489  | 0,13592829 | 7,71785982 | 130  | 2,76E-12 | 2,44E-11 |
| P36506     | Dual specificity mitogen-activated protein kinase kinase 2 (MAP kinase kinase 2) (MAPKK 2) (EC 2.7.12.2) (ERK activator kinase 2) (MAPK/ERK kinase 2) (MEK 2)                                                                                                                                                                                                                                        | lMek2 Mkk2    | MP2K2_RAT   | -7,554068593 | 0,11761757 | -64,225682 |      | 3,84E-12 | 3,38E-11 |
| Q5XIC3     | Hsp90 co-chaperone Cdc37-like 1                                                                                                                                                                                                                                                                                                                                                                      | Cdc37l1       | CD37L_RAT   | -5,66034223  | 0,11985624 | -47,226094 |      | 4,29E-12 | 3,75E-11 |
| Q1W1M1     | Cell adhesion molecule 4 (Immunoglobulin superfamily member 4C) (IgSF4C) (Nectin-like protein 4) (NECL-4)                                                                                                                                                                                                                                                                                            | m4 lgsf4c     | NcCADM4_RAT | 0,499736621  | 0,06477156 | 7,71537059 | 116  | 4,61E-12 | 4,00E-11 |
| Q5PQN6     | Spermatogenesis-defective protein 39 homolog (hSPE-39) (VPS33B-interacting protein in apical-basolateral polarity regulator) (VPS33B-interacting protein in polarity and apical restriction)                                                                                                                                                                                                         | as39 Spe39 Vi | SPE39_RAT   | -4,63460023  | 0,15087893 | -30,717346 | 11   | 5,16E-12 | 4,45E-11 |
| P18420     | Proteasome subunit alpha-type-1 (EC 3.4.25.1) (Macropain subunit C2) (Multicatalytic endopeptidase complex subunit C2) (Proteasome component C2) (Proteasome subunit)                                                                                                                                                                                                                                | Psmal         | PSAI_RAT    | -0,771424206 | 0,10455136 | -7,3784234 | 175  | 6,19E-12 | 5,32E-11 |
| Q1W1M3     | Cell adhesion molecule 3 (Immunoglobulin superfamily member 4B) (IgSF4B) (Nectin-like protein 1) (NECL-1)                                                                                                                                                                                                                                                                                            | lM3 lgsf4b    | NcCADM3_RAT | 0,624061598  | 0,06706918 | 9,3047447  | 43   | 7,34E-12 | 6,27E-11 |
| Q5XIE6     | 3-hydroxyisobutyryl-CoA hydrolase, mitochondrial (EC 3.1.2.4) (3-hydroxyisobutyryl-coenzyme A hydrolase) (HIB-CoA hydrolase) (HIBYL-CoA-H)                                                                                                                                                                                                                                                           | Hibch         | HIBCH_RAT   | 3,85959473   | 0,2641771  | 14,6098762 | 19   | 8,74E-12 | 7,42E-11 |
| Q99MS0     | SEC14-like protein 2 (Alpha-tocopherol-associated protein) (TAP) (Squalene transfer protein) (Supermatant protein factor) (SPF)                                                                                                                                                                                                                                                                      | Sec14l2       | S14L2_RAT   | -1,187376538 | 0,15543282 | -7,6391625 | 103  | 1,17E-11 | 9,88E-11 |
| P24329     | Thiosulfate sulfurtransferase (EC 2.8.1.1) (Rhodanese)                                                                                                                                                                                                                                                                                                                                               | Tst           | THTR_RAT    | -0,419510934 | 0,05742557 | -7,3052985 | 153  | 1,42E-11 | 1,20E-10 |
| Q55096     | Dipeptidyl peptidase 3 (EC 3.4.14.4) (Dipeptidyl aminopeptidase III) (Dipeptidyl arylamidase III) (Dipeptidyl peptidase III) (OPP HI) (Enkephalinase B)                                                                                                                                                                                                                                              | Dpp3          | DPP3_RAT    | -0,475833565 | 0,06748366 | -7,0510926 | 271  | 1,48E-11 | 1,23E-10 |
| Q80U96     | Exportin-1 (Exp1) (Chromosome region maintenance 1 protein homolog)                                                                                                                                                                                                                                                                                                                                  | Xpol Crm1     | XPOL_RAT    | -1,573862549 | 0,21390354 | -7,3578143 | 128  | 1,99E-11 | 1,65E-10 |
| B2RY10     | WO repeat-containing protein 91                                                                                                                                                                                                                                                                                                                                                                      | Wdr91         | WDR91_RAT   | -5,250587981 | 0,10098292 | -51,994811 |      | 2,07E-11 | 1,71E-10 |
| Q641Y5     | Ubiquitin-like modifier-activating enzyme ATG7 (ATG12-activating enzyme E1 ATG7) (Autophagy-related protein 7) (APG7-like)                                                                                                                                                                                                                                                                           | Atg7 Apg7l    | ATG7_RAT    | -0,831697503 | 0,07318074 | -11,364978 | 25   | 2,28E-11 | 1,87E-10 |
| P12839     | Neurofilament medium polypeptide (NF-M) (160 kDa neurofilament protein) (Neurofilament 3) (Neurofilament triplet M protein)                                                                                                                                                                                                                                                                          | lMnf Nef3 Nfr | NFM_RAT     | 0,558474907  | 0,08176685 | 6,83008921 | 523  | 2,36E-11 | 1,93E-10 |
| Q5U318     | Astrocytic phosphoprotein PEA-15 (15 kDa phosphoprotein enriched in astrocytes)                                                                                                                                                                                                                                                                                                                      | Pea15         | PEA15_RAT   | -1,691106455 | 0,23875332 | -7,08307   | 162  | 4,08E-11 | 3,31E-10 |
| P31647     | Sodium- and chloride-dependent GABA transporter 3 (GAT-3) (Solute carrier family 6 member 11)                                                                                                                                                                                                                                                                                                        | Gat3 Gat-3    | GAT3_RAT    | -0,683411132 | 0,09634046 | -7,0937086 | 152  | 4,63E-11 | 3,73E-10 |
| P37805     | Transglutinin-3 (Neuronal protein 22) (NP22) (Neuronal protein NP25)                                                                                                                                                                                                                                                                                                                                 | Tagln3 Np25   | TAGL3_RAT   | -1,362220167 | 0,1883496  | -7,2324027 | 112  | 6,26E-11 | 4,99E-10 |
| P35559     | Insulin-degrading enzyme (EC 3.4.24.56) (Insulin protease) (Insulinase) (Insulysin)                                                                                                                                                                                                                                                                                                                  | lde           | IDE_RAT     | -0,794977673 | 0,08395853 | -9,4686943 | 33   | 6,24E-11 | 4,99E-10 |
| Q6P7A9     | Lysosomal alpha-glucosidase (EC 3.2.1.20) (Acid maltase)                                                                                                                                                                                                                                                                                                                                             | Gaa           | LYAG_RAT    | 1,432238751  | 0,17176819 | 8,3382071  | 45   | 1,12E-10 | 8,84E-10 |
| Q63532     | Cornifin-A (Small praline-rich protein 1A) (SPRIA) (SPRRI) (Alpha-aminoadipic semialdehyde dehydrogenase (Alpha-AASA dehydrogenase) (EC 1.2.1.31) (Aldehyde dehydrogenase family 7 member A1) (EC 1.2.1.3) (Antiquitin-1) (Benzoaldehyde dehydrogenase) (EC 1.2.1.8) (Dehydro-piperidine-6-carboxylate dehydrogenase) (P6c dehydrogenase)                                                            | mla Spr Sprr  | SPRIA_RAT   | 1,44673956   | 0,0711711  | 20,3276271 | 12   | 1,15E-10 | 9,10E-10 |
| Q64057     | Aldehyde dehydrogenase, mitochondrial (EC 1.2.1.3) (ALDH class 2) (ALDH-E2) (ALDH1)                                                                                                                                                                                                                                                                                                                  | Aldh2         | ALDH2_RAT   | -0,603869989 | 0,09151123 | -6,5988622 | 328  | 1,66E-10 | 1,30E-09 |
| P11884     | N-acetylglucosaminyl kinase (N-acetylglucosamine kinase) (EC 2.7.1.59) (GlcNAc kinase)                                                                                                                                                                                                                                                                                                               | Nagk          | NAGK_RAT    | -6,985472004 | 0,13029933 | -53,610959 |      | 2,06E-10 | 1,60E-09 |
| Q68FQ0     | T-complex protein 1 subunit epsilon (TCP-1-epsilon) (CCT-epsilon) (on)                                                                                                                                                                                                                                                                                                                               | Cet5          | TCPE_RAT    | -0,558584411 | 0,08519978 | -6,5561719 | 312  | 2,29E-10 | 1,76E-09 |
| Q5FV14     | Cell cycle exit and neuronal differentiation protein 1                                                                                                                                                                                                                                                                                                                                               | Cendl         | CEND_RAT    | 0,909400701  | 0,11934733 | 7,61978282 | 59   | 2,41E-10 | 1,85E-09 |
| A2RRU1     | Glycogen [starch] synthase, muscle (EC 2.4.1.11)                                                                                                                                                                                                                                                                                                                                                     | Gysl          | GYSI_RAT    | -2,305086026 | 0,27258298 | -8,4564561 | 38   | 2,90E-10 | 2,20E-09 |
| Q6P6V0     | Glucose-6-phosphate isomerase (GP I) (EC 5.3.1.9) (Autocrine motility factor) (AMF) (Neuroleukin) (NLK) (Phosphoglucose isomerase) (PGI)                                                                                                                                                                                                                                                             | Gpi           | G6PI_RAT    | -0,844678689 | 0,12979974 | -6,5075533 | 325  | 2,89E-10 | 2,20E-09 |
| Q5U2Q3     | Phosphohexose isomerase (PHI)                                                                                                                                                                                                                                                                                                                                                                        |               |             |              |            |            |      |          |          |
|            | Ester hydrolase Clorf54 homolog (EC 3.1.-.-)                                                                                                                                                                                                                                                                                                                                                         |               | CK054_RAT   | -1,804338988 | 0,24200289 | -7,4558571 | 64   | 2,94E-10 | 2,22E-09 |
|            | Rab3 GTPase-activating protein catalytic subunit (RAB3 GTPase-activating protein 33) (RAB3 GTPase-activating protein 33)                                                                                                                                                                                                                                                                             |               |             | -3,965693619 | 0,16223952 | -24,44345  | 10   | 3,00E-10 | 2,25E-09 |
| P69735     | protein 130 kDa subunit) (Rab3-GAP p130) (Rab3-GAP) (Fragments)                                                                                                                                                                                                                                                                                                                                      | gap1 Rab3     | RBGP_RAT    |              |            |            |      |          |          |
| Q9QXU9     | ProSAAS (Proprotein convertase subtilisin/kexin type 1 inhibitor) (Proprotein convertase 1 inhibitor) (pro-SAAS) [Cleaved into: KEP; Big SAAS (b-SAAS); Little SAAS (l-SAAS); Big PEN-LEN (b-PEN-LEN) (SAAS CT(l-49)); PEN; PEN-20; Little LEN (l-LEN); Big LEN (b-LEN) (SAAS CT[25-40])] (Alpha-2-HS-glycoprotein (59 kDa bone sialic acid-containing protein) (BSP) (Fetuin-A) (Glycoprotein PP63) | Peskin        | PCSKI_RAT   | 0,314849995  | 0,04536577 | 6,94025485 | 105  | 3,34E-10 | 2,50E-09 |
| P24090     | ProSAAS (Proprotein convertase subtilisin/kexin type 1 inhibitor) (Proprotein convertase 1 inhibitor) (pro-SAAS) [Cleaved into: KEP; Big SAAS (b-SAAS); Little SAAS (l-SAAS); Big PEN-LEN (b-PEN-LEN) (SAAS CT(l-49)); PEN; PEN-20; Little LEN (l-LEN); Big LEN (b-LEN) (SAAS CT[25-40])] (Alpha-2-HS-glycoprotein (59 kDa bone sialic acid-containing protein) (BSP) (Fetuin-A) (Glycoprotein PP63) | Ahsg Fetua    | FETUA_RAT   | 0,706660424  | 0,09825493 | 7,19211153 | 75   | 4,05E-10 | 3,01E-09 |
| CON_002203 | Phosphoglycerate kinase 1 (EC 2.7.2.3)                                                                                                                                                                                                                                                                                                                                                               | Pgk1 Pkg-1    | PGKI_RAT    | -1,366340027 | 0,07572222 | -18,044109 | 12   | 4,62E-10 | 3,42E-09 |
| P16617     | Phospholysine phosphohistidine inorganic pyrophosphate phosphatase (EC 3.1.3.-) (EC 3.6.1.1)                                                                                                                                                                                                                                                                                                         | Lhpp          | LHPP_RAT    | -0,44517297  | 0,07084163 | -6,2840589 | 789  | 5,45E-10 | 4,01E-09 |
| Q51005     | Spermatogenic leucine zipper protein 1                                                                                                                                                                                                                                                                                                                                                               | Spz1          | SPZI_RAT    | -1,693633388 | 0,24924728 | -6,7949924 | 109  | 5,99E-10 | 4,38E-09 |
| Q6AXY9     | Bleomycin hydrolase (BH) (BLM hydrolase) (BMH) (EC 3.4.22.40)                                                                                                                                                                                                                                                                                                                                        | Blmh          | BLMH_RAT    | -7,469676088 | 0,10937313 | -68,295348 |      | 6,63E-10 | 4,83E-09 |
| P70645     | Sulfotransferase 1 family member 01 (ST1 D1) (EC 2.8.2.-) (Dopamine sulfotransferase Sult1d1) (Tyrosine-ester sulfotransferase)                                                                                                                                                                                                                                                                      | Sult1d1       | STIDI_RAT   | -3,714841139 | 0,36601402 | -10,14945  | 22   | 9,21E-10 | 6,68E-09 |

|        |                                                                                                                                                                                                                                                                                        |                                                                               |              |            |             |          |          |          |
|--------|----------------------------------------------------------------------------------------------------------------------------------------------------------------------------------------------------------------------------------------------------------------------------------------|-------------------------------------------------------------------------------|--------------|------------|-------------|----------|----------|----------|
| G3V9R3 | He mog lo bin subunit alpha-1/2 (Alpha-1/2 globin) (He mog lo bin alpha-1/2 chain)                                                                                                                                                                                                     | Hbal Hba-a1 HBA_RAT                                                           | 1,191633525  | 0,04698501 | 25,361994   | 1,11E-09 | 7,99E-09 |          |
| P01946 | cAMP-dependent protein kinase type I-alpha regulatory subunit (Cleaved into: cAMP-dependent protein kinase type I-alpha regulatory subunit, N-terminally processed)                                                                                                                    | Prkar1a KAPO_RAT                                                              | 0,752250143  | 0,11716906 | 6,42021172  | 176      | 1,22E-09 | 8,79E-09 |
| P09456 | E3 ubiquitin-protein ligase RNF123 (EC 6.3.2.-) (Kip1 ubiquitin-promoting complex protein 1) (RING finger protein 123)                                                                                                                                                                 | Rnf123 Kpel RN123_RAT                                                         | -1,451030345 | 0,20487629 | -7,082471   | 63       | 1,44E-09 | 1,03E-08 |
| D3ZXK7 | Pyruvate dehydrogenase E1 component subunit beta, mitochondrial (PDHE1-B) (EC 1.2.4.1)                                                                                                                                                                                                 | Pdhb ODPB_RAT                                                                 | -6,604336833 | 0,16395958 | -40,280274  |          | 1,51E-09 | 1,08E-08 |
| P49432 | STE20/SPS1-related proline-4 lanine-rich protein kinase (Ste-20-related kinase) (EC 2.7.11.1) (Pancreatic serine/threonine-protein kinase) (PS/TK) (PSTK) (Serine/threonine-protein kinase 39)                                                                                         | tk39 Pask Spa STK39_RAT                                                       | -0,597283251 | 0,09642777 | -6,1941001  | 364      | 1,58E-09 | 1,12E-08 |
| P08506 | Complement C1q subcomponent subunit C1 Proenkephalin-A [Cleaved into: Synenkephalin; Met-enkephalin (Opioid growth factor) (OGF); PENK (114-133); PENK (143-185); Met-enkephalin-Arg-Gly-Leu; Leu-enkephalin; PENK (239-260); Met-enkephalin-Arg-Phe]                                  | C1cq C1qg C1CQ_RAT                                                            | -1,006734672 | 0,14641383 | -6,8759536  | 74       | 1,67E-09 | 1,15E-08 |
| P31722 | Proteasome subunit beta type-3 (EC 3.4.25.1) (Proteasome chain 13) (Proteasome component C10-1) (Proteasome theta chain)                                                                                                                                                               | Ik Penk-rs Per PENK_RAT                                                       | 0,670629975  | 0,04178315 | 16,0502484  | 12       | 1,79E-09 | 1,25E-08 |
| P04094 | Guanine nucleotide-binding protein alpha-q                                                                                                                                                                                                                                             | Psmb3 PSB3_RAT                                                                | -2,223428027 | 0,12553577 | -17,711511  | 11       | 1,96E-09 | 1,37E-08 |
| P40112 | Glyoxalase domain-containing protein 4                                                                                                                                                                                                                                                 | Glod4 GLOD4_RAT                                                               | -1,428847224 | 0,21240366 | -6,7270367  | 84       | 1,98E-09 | 1,37E-08 |
| Q51001 | Visinin-like protein 1 (VILIP) (21 kDa CABP) (Neural visinin-like protein 1) (NVL-1) (NVP-1)                                                                                                                                                                                           | Gnaq GNAQ_RAT                                                                 | -0,693984672 | 0,11012115 | -6,3011935  | 185      | 2,10E-09 | 1,45E-08 |
| P82471 | 40S ribosomal protein S30                                                                                                                                                                                                                                                              | Fau RS30_RAT                                                                  | 0,536594382  | 0,07072032 | 7,58755621  | 42       | 2,12E-09 | 1,46E-08 |
| P62864 | Visinin-like protein 1 (VILIP) (21 kDa CABP) (Neural visinin-like protein 1) (NVL-1) (NVP-1)                                                                                                                                                                                           | Vsnll Visll VISLI_RAT                                                         | -0,516916095 | 0,04330419 | -11,936861  | 16       | 2,22E-09 | 1,52E-08 |
| P62762 | Nicotinate phosphoribosyltransferase (NAPR Tase) (EC 6.3.4.21) (Nicotinate phosphoribosyltransferase domain-containing protein 1) (Protein phosphatase 1F (EC 3.1.3.16) (Ca(2+)-calmodulin-dependent protein kinase phosphatase) (CaM-kinase phosphatase) (CaMKPase) (Partner of PIX2) | Naprt Naprtl PNCB_RAT                                                         | 0,592888789  | 0,09521589 | 6,22678401  | 228      | 2,27E-09 | 1,54E-08 |
| Q6XQN1 | Creatine kinase B-type (EC 2.7.3.2) (B-CK) (Creatine kinase B chain)                                                                                                                                                                                                                   | Ppm1f Popx2 PPM1F_RAT                                                         | -5,682021416 | 0,19918292 | -28,52665   |          | 2,47E-09 | 1,67E-08 |
| Q9WVR7 | Hyaluronan and proteoglycan link protein-2 (Brain link protein 1)                                                                                                                                                                                                                      | Ckb Ckbb KCRB_RAT                                                             | -0,799103618 | 0,12747079 | -6,2689156  | 184      | 2,52E-09 | 1,70E-08 |
| P07335 | Gamma-enolase (EC 4.2.1.11) (2-phospho-D-glycylate hydro-lyase) (Enolase 2) (Neural enolase) (Neuron-specific enolase) (NSE)                                                                                                                                                           | Hapln2 Brall HPLN2_RAT                                                        | -0,483791099 | 0,08028105 | -6,0262179  | 645      | 2,82E-09 | 1,89E-08 |
| Q9E5M2 | Coatomer subunit delta (Archain) (Delta-coat protein) (Delta-COP)                                                                                                                                                                                                                      | Eno2 Eno-2 ENOG_RAT                                                           | -0,679285058 | 0,07176434 | -9,4654956  | 22       | 3,25E-09 | 2,17E-08 |
| P07323 | Peroxisomal protein 6 (EC 1.11.1.15) (1-Cys peroxidoxin) [1-Cys PRX) (Acidic calcium-independent phospholipase A2) (iPLA2) (EC 3.1.1.-) (Antioxidant protein 2) (Non-nuclear glutathione peroxidase) (NSGPX) (EC 1.1.1.9) (Thiol-specific antioxidant protein)                         | Arcnl Copd COPD_RAT                                                           | -0,655759558 | 0,10946094 | -5,9908087  | 487      | 4,06E-09 | 2,70E-08 |
| Q66H80 | ATP synthase subunit delta, mitochondrial (F-ATPase delta subunit) (-terminal-binding protein 1 (CIBP) (EC 1.1.1.-) (50 kDa Delta-dependent ADP-ribosylation substrate) (BARS-SO) (-terminal-binding protein 3) (CIBP3)                                                                | AtpSd ATPD_RAT                                                                | -0,316793795 | 0,05304857 | -5,9717687  | 427      | 4,94E-09 | 3,26E-08 |
| Q35244 | ATP synthase subunit delta, mitochondrial (F-ATPase delta subunit) (-terminal-binding protein 1 (CIBP) (EC 1.1.1.-) (50 kDa Delta-dependent ADP-ribosylation substrate) (BARS-SO) (-terminal-binding protein 3) (CIBP3)                                                                | bpl Bars Ctb1 CTBPI_RAT                                                       | 0,582228197  | 0,07991711 | 7,28540144  | 42       | 5,69E-09 | 3,74E-08 |
| P35434 | 4-methylaminobutyraldehyde dehydrogenase (TMABADH) (EC 1.2.1.47) (Aldehyde dehydrogenase family 9 member A1) (EC 1.2.1.3)                                                                                                                                                              | Aldh9a1 AL9A1_RAT                                                             | -0,812098379 | 0,12582699 | -6,4540872  | 88       | 5,75E-09 | 3,76E-08 |
| Q9Z2F5 | Ubiquitin-fold modifier 1                                                                                                                                                                                                                                                              | Ufm1 UFM1_RAT                                                                 | -0,343083105 | 0,05683538 | -6,0364357  | 231      | 6,23E-09 | 4,05E-08 |
| Q9JUJ3 | E3 ubiquitin-protein ligase RNF181 (EC 6.3.2.-) (RING finger protein 181)                                                                                                                                                                                                              | Rnf181 RN181_RAT                                                              | -0,777177283 | 0,11419083 | -6,8059519  | 55       | 7,84E-09 | 5,07E-08 |
| Q6AXU4 | Glutathione S-transferase alpha-3 (EC 2.5.1.18) (GST A3-3) (GST AA) [Glutathione S-transferase Yc-1] (GST Yc1)                                                                                                                                                                         | Gsta3 Gsyt1 GSTA3_RAT                                                         | 0,397135743  | 0,03646592 | 10,8905995  | 16       | 8,28E-09 | 5,33E-08 |
| P04904 | DNA damage-binding protein 1 (Damage-specific DNA-binding protein 1)                                                                                                                                                                                                                   | Ddb1 DDB1_RAT                                                                 | -2,837297143 | 0,38757416 | -7,3206562  | 38       | 9,09E-09 | 5,83E-08 |
| Q9E5W0 | Endophilin-A1 (Endophilin-1) (SH3 domain protein 2A) (SH3 domain-containing GRB2-like protein 2) (SH3 p4)                                                                                                                                                                              | Sh3d2a Sh SH3G2_RAT                                                           | -0,830312942 | 0,13576061 | -6,1160078  | 131      | 1,03E-08 | 6,58E-08 |
| Q35179 | Short coiled-coil protein                                                                                                                                                                                                                                                              | Scoc Scoco SCOC_RAT                                                           | -0,36467135  | 0,06265273 | -5,8205183  | 323      | 1,41E-08 | 8,99E-08 |
| Q5RJZ6 | Aflatoxin B1 aldehyde reductase member 2 (aRAFAR2) (EC 1.1.1.nll) (Succinial semialdehyde reductase) (SSA reductase)                                                                                                                                                                   | Ar7a2 Afar2 Ai ARK72_RAT                                                      | -1,272003278 | 0,11595894 | -10,969429  | 15       | 1,46E-08 | 9,24E-08 |
| Q8CG45 | Vesicular inhibitory amino acid transporter (GABA and glycine transporter) (Solute carrier family 32 member 1) (Vesicular GABA transporter) (rGVAT)                                                                                                                                    | Slc32a1 Vgat Vic V1AAT_RAT                                                    | -0,734550983 | 0,11992091 | -6,1252952  | 107      | 1,53E-08 | 9,63E-08 |
| Q35458 | Tetraspanin -2 (Tspan-2)                                                                                                                                                                                                                                                               | Tspan2 TSN2_RAT                                                               | -0,755990714 | 0,12668269 | -5,9675927  | 156      | 1,56E-08 | 9,75E-08 |
| Q9JWJ1 | 14-3-3 protein eta                                                                                                                                                                                                                                                                     | Ywhah 1433F_RAT                                                               | 1,709504318  | 0,12878144 | 13,2744621  | 12       | 1,56E-08 | 9,75E-08 |
| P68511 | Protein SIOO-A1 (S-100 protein alpha chain) (S-100 protein subunit alpha) (SIOO calcium-binding protein Al)                                                                                                                                                                            | SIOOa1 SIOA1_RAT                                                              | 0,720764267  | 0,12366821 | 5,82820972  | 254      | 1,69E-08 | 1,05E-07 |
| P35467 | ATP synthase subunit f1, mitochondrial                                                                                                                                                                                                                                                 | Atp5f2 ATPK_RAT                                                               | -1,947754831 | 0,30235632 | -6,4419186  | 62       | 1,97E-08 | 1,22E-07 |
| D3ZAF6 | Guanine nucleotide-binding protein G(i)(G(S)/G(T) subunit beta-1 (Transducin beta chain 1)                                                                                                                                                                                             | Gnb1l GBB1_RAT                                                                | -0,738997218 | 0,06919664 | -10,67967   | 15       | 2,09E-08 | 1,29E-07 |
| P54311 | Oxidation resistance protein 1 (Protein C7)                                                                                                                                                                                                                                            | Oxrl C7 OXRI_RAT                                                              | 0,530121139  | 0,09065446 | 5,8477118   | 181      | 2,28E-08 | 1,40E-07 |
| Q4V8B0 | Chloride intracellular channel protein 4 (Intracellular chloride ion channel protein p64Hl)                                                                                                                                                                                            | Clic4 CLIC4_RAT                                                               | 0,390072441  | 0,0677161  | 5,76040952  | 200      | 3,13E-08 | 1,91E-07 |
| Q9Z0W7 | Alpha-interxerin (Alpha-Inx)                                                                                                                                                                                                                                                           | Ina Inexa AIN X_RAT                                                           | -0,749744615 | 0,13105991 | -5,7206253  | 219      | 3,46E-08 | 2,11E-07 |
| P23565 | Myristoylated alanine-rich C-kinase substrate (MARCKS) (Protein kinase C substrate 80 kDa protein)                                                                                                                                                                                     | MarcksMacrs MARCS_RAT                                                         | 0,402295569  | 0,07007041 | 5,74130456  | 189      | 3,69E-08 | 2,24E-07 |
| P30009 | Actin-related protein 2/3 complex subunit 2 (Arp2/3 complex 34 kDa subunit) (p34-ARC)                                                                                                                                                                                                  | Arpc2 ARPC2_RAT                                                               | 0,991542875  | 0,16788639 | 5,90603481  | 111      | 3,90E-08 | 2,35E-07 |
| P85970 | Brevican core protein (Brain-enriched hyaluronan-binding protein) (BEHAB)                                                                                                                                                                                                              | Bean Behab PGCB_RAT                                                           | -0,701900704 | 0,12095486 | -5,8029972  | 138      | 4,26E-08 | 2,56E-07 |
| P55068 | Myoglobin                                                                                                                                                                                                                                                                              | Mb MYG_RAT                                                                    | 0,505676534  | 0,08778311 | 5,76052176  | 136      | 5,35E-08 | 3,20E-07 |
| P61459 | Pterin-4-alphacarbinolamine dehydratase (PHS) (EC 4.2.1.96) (4-alpha-hydroxy-5-tetrahydropterin dehydratase) (Dimerization cofactor of HNF1) (Phenylalanine hydroxylase-stimulating protein) (Pterin carbinolamine dehydratase) (PCD)                                                  | hdbl Dech Pd PHS_RAT                                                          | 0,782256778  | 0,0708318  | 11,0438647  | 13       | 5,62E-08 | 3,35E-07 |
| Q9QZ76 | Farnesyl pyrophosphate synthase (FPP synthase) (FPS) (EC 2.5.1.10)                                                                                                                                                                                                                     | Fdps FPPS_RAT                                                                 | -1,750123861 | 0,2142618  | -8,1681563  | 21       | 5,89E-08 | 3,50E-07 |
| P61459 | ((2E,6E)-farnesyl diphosphate synthase) (Cholesterol-regulated 39 kDa protein) (CR 39) [Dimethylallyltransferase] (EC 2.5.1.1) (Farnesyl diphosphate synthase) (Geranyl transferase)                                                                                                   | Fdps FPPS_RAT                                                                 | -1,750123861 | 0,2142618  | -8,1681563  | 21       | 5,89E-08 | 3,50E-07 |
| P05369 | Haloacid dehalogenase-like hydrohalase domain-containing protein 2                                                                                                                                                                                                                     | Hdh2 HDH02_RAT                                                                | -1,616509589 | 0,27897646 | -5,7944311  | 115      | 6,09E-08 | 3,60E-07 |
| Q6AYR6 | Sorting nexin-3                                                                                                                                                                                                                                                                        | Snx3 SNX3_RAT                                                                 | -0,869995774 | 0,1466216  | -5,9336126  | 85       | 6,23E-08 | 3,67E-07 |
| Q5U211 | Quinone oxidoreductase (EC 1.6.5.5) (NAD(P)H:quinone reductase) (Zeta-crystallin)                                                                                                                                                                                                      | Cryz QOR_RAT                                                                  | -0,355782737 | 0,0600978  | -5,9200622  | 83       | 7,00E-08 | 4,10E-07 |
| Q6AYTO | Ras-related protein Ral-A                                                                                                                                                                                                                                                              | RalA Ral-Ral-A RALA_RAT                                                       | -1,949356875 | 0,15537547 | -12,546104  | 11       | 7,35E-08 | 4,30E-07 |
| P63322 | P11240                                                                                                                                                                                                                                                                                 | Glutathione S-transferase alpha-4 (EC 2.5.1.18) (GST A4-4) (GST A4-GSTA4_RAT) | 4,2654048422 | 0,22018839 | -12,053393  | 41       | 1,11E-07 | 7,16E-07 |
| P14942 | Arf-GAP with coiled-coil, ANK repeat and PH domain-containing protein 2                                                                                                                                                                                                                | ArfGAP with coiled-coil, ANK repeat and PH domain-containing protein 2        | 0,03826419   | 0,06264512 | -9,76644062 | 65       | 1,25E-07 | 7,16E-07 |
| Q5FVC7 | Thiamine-binding protein                                                                                                                                                                                                                                                               | Thiamine-binding protein                                                      | 0,22714436   | 0,10762791 | 6,24151006  | 46       | 1,26E-07 | 7,16E-07 |
| P02401 | Thiamine-binding protein                                                                                                                                                                                                                                                               | Thiamine-binding protein                                                      | 0,22714436   | 0,10762791 | 6,24151006  | 46       | 1,26E-07 | 7,16E-07 |
| P57113 | Thiamine-binding protein                                                                                                                                                                                                                                                               | Thiamine-binding protein                                                      | 0,22714436   | 0,10762791 | 6,24151006  | 46       | 1,26E-07 | 7,16E-07 |
| Q8CGV7 | Thiamine-binding protein                                                                                                                                                                                                                                                               | Thiamine-binding protein                                                      | 0,22714436   | 0,10762791 | 6,24151006  | 46       | 1,26E-07 | 7,16E-07 |
| P62755 | Thiamine-binding protein                                                                                                                                                                                                                                                               | Thiamine-binding protein                                                      | 0,22714436   | 0,10762791 | 6,24151006  | 46       | 1,26E-07 | 7,16E-07 |
|        |                                                                                                                                                                                                                                                                                        | CoxSa COXSA_RAT                                                               | 0,770367867  | 0,11523583 | 6,68514205  | 32       | 1,52E-07 | 8,62E-07 |
|        |                                                                                                                                                                                                                                                                                        | Ube2n UBE2N_RAT                                                               | -1,328456877 | 0,23608224 | -5,62700000 | 104      | 1,56E-07 | 8,62E-07 |

U  
b  
i  
q  
u  
i  
t  
i  
n  
-  
c  
o  
n  
j  
u  
g  
a  
t  
i  
n  
g  
e  
n  
z  
y  
m  
e  
E  
2  
N  
{  
E  
C  
6  
.  
3  
.  
2  
.  
1  
9  
)  
(  
B  
e  
n  
d  
l  
e  
s  
s  
-  
l  
i  
k  
e  
u  
b  
i  
q  
u  
i  
t  
i  
n  
-  
c  
o  
n  
j  
u  
g  
a  
t  
i  
n  
g  
e  
n  
z  
y  
m  
e  
)  
(  
U  
b  
i  
q  
u  
i  
t  
i  
n  
c  
a  
r  
r  
i  
e  
r  
p  
r  
o  
t  
e  
i  
n  
N

)(Ubiquitin-protein ligase N)

|              |            |            |    |          |          |
|--------------|------------|------------|----|----------|----------|
| 0,278272983  | 0,04300892 | 6,47012201 | 43 | 7,57E-08 | 4,40E-07 |
| -0,625202694 | 0,10530348 | -5,9371514 | 72 | 9,37E-08 | S,43E-07 |

|          |                                                                                                                                                                                                                                                                                                                           |              |              |              |            |            |     |          |          |
|----------|---------------------------------------------------------------------------------------------------------------------------------------------------------------------------------------------------------------------------------------------------------------------------------------------------------------------------|--------------|--------------|--------------|------------|------------|-----|----------|----------|
| Q9EQX9   | Neuromodulin {Axonal membrane protein GAP-43} (Growth-associated protein 43) (Protein F1)                                                                                                                                                                                                                                 | Gap43        | NEUM_RAT     | 0,643389648  | 0,07311639 | 8,79952758 | 16  | 1,SBE-07 | 8,89E-07 |
| P07936   | Glutathione S-transferase Mu 2 (EC 2.5.1.18) (GST M2-2) {Glutathione S-transferase Yb-2} (GST Yb2)                                                                                                                                                                                                                        | Gstm2        | GSTM2_RAT    | 0,904283757  | 0,1592347  | 5,67893672 | 91  | 1,61E-07 | 9,01E-07 |
| P08010   | Protein LZIC {Leucine zipper and CTNBNBIP1 domain-containing protein} (Leucine zipper and ICAT homologous domain-containing protein)                                                                                                                                                                                      | Lzic         | LZIC_RAT     | 0,994808275  | 0,11406346 | 8,72153351 | 16  | 1,78E-07 | 9,94E-07 |
| QSPQN7   | Integrin beta-1 {Beta oligodendroglia} (Beta OL) (Fibronectin receptor subunit beta) {VLA-4 subunit beta} (CD antigen CD29)                                                                                                                                                                                               | Iltgbl       | ITBI_RAT     | -0,331237899 | 0,05543174 | -5,9755997 | 54  | 1,87E-07 | 1,04E-06 |
| P49134   | Tyrosine tRNA ligase, cytoplasmic (EC 6.1.1.1) (Tyrosyl-tRNA synthetase) {TyRS} [Cleaved into: Tyrosine tRNA ligase, cytoplasmic, N-term inally processed]                                                                                                                                                                | Vars         | SYYC_RAT     | -0,936749283 | 0,13400094 | -6,9906175 | 26  | 2,01E-07 | 1,12E-06 |
| Q4KM49   | Enoyl-CoA delta isomerase 2, mitochondrial (EC 5.3.3.8) (Delta(3),delta(2)-enoyl-CoA isomerase) (D3, D2-cis-omega-CoA isomerase) (Dodecenoyl-CoA isomerase) (Peroxisomal delta(3)-trans-omega-CoA isomerase) (pECI)                                                                                                       | Ec12Peci     | EC12_RAT     | -0,36768861  | 0,0691463  | -5,3175458 | 292 | 2,09E-07 | 1,16E-06 |
| QXSICO   | 14-3-3 protein epsilon {14-3-3E} [Mitochondrial import stimulatory factor L subunit] [MSF L]                                                                                                                                                                                                                              | Ywhae        | 1433E_RAT    | -1,229312789 | 0,13168587 | -9,3351915 | 14  | 2,1BE-07 | 1,19E-06 |
| P62260   | Elongation factor 1-alpha 2 (EF-1-alpha-2) (Eukaryotic elongation factor_1a_2) (eEF1A-2) (Statin-51)                                                                                                                                                                                                                      | Eef1a2       | StnEfiA2_RAT | 0,423374396  | 0,08084478 | 5,23687959 | 688 | 2,17E-07 | 1,19E-06 |
| P62632   | 60S ribosomal protein L23                                                                                                                                                                                                                                                                                                 | Rpl23        | RL23_RAT     | -1,201127926 | 0,21547401 | -5,5743517 | 98  | 2,19E-07 | 1,20E-06 |
| P62832   | ATP synthase subunit beta, mitochondrial (EC 3.6.3.14)                                                                                                                                                                                                                                                                    | AtpSb        | ATPB_RAT     | -0,418444562 | 0,04892053 | -8,5535557 | 16  | 2,30E-07 | 1,25E-06 |
| P10719   | Hemopexin                                                                                                                                                                                                                                                                                                                 | Hpx          | HEM O_RAT    | -0,486294605 | 0,09344175 | -5,2042542 | 824 | 2,46E-07 | 1,33E-06 |
| P20059   | Ketimine reductase mu-crystallin (EC 1.5.1.25) (CDK108) (NADP-regulated thyroid-hormone-binding protein)                                                                                                                                                                                                                  | Crym         | CRYM_RAT     | 0,44453121   | 0,08295014 | 5,35901679 | 180 | 2,54E-07 | 1,37E-06 |
| Q9QYU4   | Heme oxygenase 2 (HO-2) (EC 1.1.4.99.3)                                                                                                                                                                                                                                                                                   | Hmo2         | HMOX2_RAT    | -0,828842031 | 0,1174614  | -7,0562927 | 24  | 2,70E-07 | 1,45E-06 |
| P23711   | Proteasome subunit beta type-10 (EC 3.4.25.1) (Low molecular mass protein 10) {Macropain subunit MECL-1} {Multicatalytic endopeptidase complex subunit MECL-1} (Proteasome MECL-1) (Proteasome subunit beta-2i)                                                                                                           | b10Lmp10M    | PSBIO_RAT    | -0,801218113 | 0,12182849 | -6,5766071 | 30  | 2,82E-07 | 1,51E-06 |
| Q4KM35   | Tryptophan 5-hydroxylase 2 (EC 1.1.4.16.4) (Neuronal tryptophan hydroxylase) {Tryptophan 5-mono-oxygenase 2}                                                                                                                                                                                                              | Tph2Nph      | TPH2_RAT     | -0,667938223 | 0,06580843 | -10,149737 | 12  | 3,05E-07 | 1,63E-06 |
| Q8CGU9   | Neurotrimin {GP65}                                                                                                                                                                                                                                                                                                        | NtmHntNt     | NTRI_RAT     | -0,751560045 | 0,08653709 | -8,6848319 | 15  | 3,09E-07 | 1,64E-06 |
| Q62718   | Protein S100-A4 {Metastasin} {Nerve growth factor-induced protein 42A} {P9K} (Placental calcium-binding protein) {S100 calcium-binding protein A4}                                                                                                                                                                        | S100a4       | S10A4_RAT    | 0,298284485  | 0,03599419 | 8,28701863 | 16  | 3,50E-07 | 1,86E-06 |
| P05942   | Bifunctional ATP-dependent dihydroxyacetone kinase/FAD-AMP lyase (cyclizing) [Includes: ATP-dependent dihydroxyacetone kinase (DHA kinase) (EC 2.7.1.28) {EC 2.7.1.29} (Glycylglycyl kinase) (Triokinase) (Triose kinase); FAD-AMP lyase (cyclizing) {EC 4.6.1.15} (FAD-AMP lyase (cyclic FMN forming)) (FMN cyclase)]    | Dak          | DHAK_RAT     | -4,288059271 | 0,64361468 | -6,6624634 | 27  | 3,77E-07 | 1,99E-06 |
| Q4KLZ6   | Mississippi-like kinase 1 (EC 2.7.11.1) {GCK family kinase MiNK} {MAPK/ERK kinase kinase kinase 6} {MEKK kinase kinase 6} {MEKKK 6} {Mississippi-related kinase} (Mitogen-activated protein kinase kinase kinase kinase 6)                                                                                                | klMap4k6     | MINK1_RAT    | -0,50510461  | 0,08811695 | -5,7322207 | 52  | 5,0BE-07 | 2,68E-06 |
| F1LP90   | Arfaptin-2 (ADP-ribosylation factor-interacting protein 2)                                                                                                                                                                                                                                                                | Arfp2        | ARFP2_RAT    | -0,493761315 | 0,0616458  | -8,0096504 | 16  | 5,46E-07 | 2,86E-06 |
| Q6AY65   | Palmitoyl-protein thioesterase 1 (PPT-1) (EC 3.1.2.22) (Palmitoyl-protein hydrolase 1)                                                                                                                                                                                                                                    | Ppt1Ppt      | PPT1_RAT     | 1,137138638  | 0,12625181 | 9,00690934 | 13  | 5,97E-07 | 3,12E-06 |
| P45479   | Transgelin {Smooth muscle protein 22-alpha} (SM22-alpha) {Excitatory amino acid transporter 2 (GLT-1)} (Sodium-dependent glutamate/aspartate transporter 2) (GLUT-R) (Solute carrier family 1 member 2)                                                                                                                   | TaglnSm22    | TAGL_RAT     | -0,576508186 | 0,10402743 | -5,5418862 | 63  | 6,27E-07 | 3,27E-06 |
| P31232   | MARCKS-related protein {Brain protein F52} (MARCKS-like protein 1) {Macrophage myristoylated alanine-rich C kinase substrate} (MacMARCKS) {MacMARCKS}                                                                                                                                                                     | cla2Eaat2Gi  | EAA2_RAT     | -0,566096094 | 0,10194588 | -5,5529078 | 59  | 7,04E-07 | 3,66E-06 |
| P31596   | Estradiol 17-beta-dehydrogenase 11 (EC 1.1.1.1) (17-beta-hydroxysteroid dehydrogenase 11) {17-beta-HSD 11} {17-beta-HSD 11} (17-steroid dehydroxysteroid dehydrogenase XI) {17-beta-HSD XI} {17-beta-HSDXI} (Dehydrogenase/reductase SDR family member 8)                                                                 | dh11Dhl      | DHBI1_RAT    | 0,548928658  | 0,06597608 | 8,32011661 | 14  | 8,65E-07 | 4,46E-06 |
| Q9EPH2   | Retinoid-inducible serine carboxypeptidase (EC 3.4.16.-) (Serine carboxypeptidase 1)                                                                                                                                                                                                                                      | SceplRise    | RISC_RAT     | -6,169637718 | 0,38992248 | -15,822729 |     | 9,76E-07 | 5,01E-06 |
| Q6AY58   | Nischarin (1-methylzoline receptor 1) (IL-1) (IL1) (Imidazole-1-receptor) (ILR)                                                                                                                                                                                                                                           | Nisch        | NISCH_RAT    | -0,804700689 | 0,15098226 | -5,3297698 | 65  | 1,32E-06 | 6,76E-06 |
| Q920A6   | Guanine nucleotide-binding protein G(z) subunit alpha (G(z) alpha chain) (Gz-alpha)                                                                                                                                                                                                                                       | Gnaz         | GNAZ_RAT     | -1,237359864 | 0,21791334 | -5,6782198 | 40  | 1,34E-06 | 6,83E-06 |
| Q4G017   | ADP-ribosylation factor-like protein 3 {ARD3}                                                                                                                                                                                                                                                                             | Ar13         | ARL3_RAT     | 0,519027137  | 0,06975008 | 7,44124034 | 16  | 1,40E-06 | 7,11E-06 |
| P19627   | Guanine nucleotide-binding protein subunit alpha-11 (G(alpha)-11) (G-protein subunit alpha-11)                                                                                                                                                                                                                            | Gnal1        | GNA11_RAT    | -0,254596113 | 0,04900488 | -5,1953216 | 83  | 1,44E-06 | 7,27E-06 |
| P37996   | Annexin A8 {Annexin VIII} {Annexin-8}                                                                                                                                                                                                                                                                                     | Anxa8        | ANXAB_RAT    | -2,002022571 | 0,29717835 | -6,7367713 | 20  | 1,49E-06 | 7,51E-06 |
| Q9JID2   | 40S ribosomal protein S18                                                                                                                                                                                                                                                                                                 | Rps18        | RS18_RAT     | -0,505850102 | 0,06374164 | -7,9359441 | 14  | 1,50E-06 | 7,56E-06 |
| Q4FZU6   | Ciliary neurotrophic factor receptor subunit alpha (CNTF receptor subunit alpha) {CNTFR-alpha}                                                                                                                                                                                                                            | Cntfr        | CNTFR_RAT    | 0,466214621  | 0,08691751 | 5,36387484 | 56  | 1,60E-06 | 8,04E-06 |
| Q08406   | Serine-threonine kinase receptor-associated protein (UNR-interacting protein)                                                                                                                                                                                                                                             | StrapUnrip   | STRAP_RAT    | 0,768997763  | 0,06222674 | 12,3579958 |     | 1,71E-06 | 8,55E-06 |
| QXSUGB   | Atlastin-1 {EC 3.6.5.-} (Spastic paraplegia 3A homolog)                                                                                                                                                                                                                                                                   | At1lSpg3a    | ATLAI_RAT    | -0,435137391 | 0,08854867 | -4,9141042 | 197 | 1,87E-06 | 9,32E-06 |
| Q6PST4   | Ras-related protein Rab-6A (Rab-6)                                                                                                                                                                                                                                                                                        | Rab6a        | Rab6_RAT     | -0,823933353 | 0,16523003 | -4,9865837 | 122 | 2,06E-06 | 1,02E-05 |
| Q9WVB1   | Vimentin                                                                                                                                                                                                                                                                                                                  | Vim          | VIME_RAT     | -0,405845194 | 0,08242916 | -4,9235634 | 160 | 2,10E-06 | 1,04E-05 |
| P31000   | Cytochrome b5 type B {Cytochrome b5 outer mitochondrial membrane isoform}                                                                                                                                                                                                                                                 | SbCybsm      | ORCYBSB_RAT  | 1,508014831  | 0,25825189 | 5,83931779 | 29  | 2,48E-06 | 1,22E-05 |
| P04166   | AP-2 complex subunit alpha-2 {100 kDa coated vesicle protein C} (Adaptor protein complex AP-2 subunit alpha-2) (Adaptor-related protein complex 2 subunit alpha-2) {Alpha-adaptin C} (Alpha2-adaptin) {Clathrin assembly protein complex 2 alpha-C large chain} (Plasma membrane adaptor HA2/AP2 adaptin alpha C subunit) | Ap2a2Adtb    | AP2A2_RAT    | -0,670989707 | 0,08836244 | -7,5936074 | 14  | 2,50E-06 | 1,23E-05 |
| P18484   | CD151 antigen {Platelet-endothelial tetraspan antigen 3} (PETA-3) (CD antigen CD151)                                                                                                                                                                                                                                      | Cdis1Peta3   | CDIS1_RAT    | -0,443644031 | 0,09271328 | -4,7851183 | 327 | 2,59E-06 | 1,27E-05 |
| Q9QZA6   | Allograft inflammatory factor 1 {AIF-1} (Nucleic acid-binding adapter molecule 1) {MRF-1} (Microglia response factor)                                                                                                                                                                                                     | ifl1lbalMrf1 | AIFI_RAT     | 1,396908773  | 0,15895624 | 8,78800817 | 11  | 2,65E-06 | 1,29E-05 |
| P41498   | GMP synthase {glutamine-hydrolase} (EC 6.3.5.2) (GMP synthetase) {Glutamine amidotransferase}                                                                                                                                                                                                                             | Gmps         | GUAA_RAT     | -0,474128499 | 0,08598317 | -5,5142012 | 38  | 2,64E-06 | 1,29E-05 |
| P55009   | Protein NDR G2 {Antidepressant-related protein ADRG123} (N-myc downstream-regulated gene 2 protein) (NDRG1-related protein)                                                                                                                                                                                               | Ndr2g        | NDRG2_RAT    | -0,37466149  | 0,04289822 | -8,7337308 | 11  | 2,81E-06 | 1,36E-05 |
| Q4V7C6   | Protein S100-A11 {Calgizzarin} {S100 calcium-binding protein A11}                                                                                                                                                                                                                                                         | S100a11      | SI OAB_RAT   | -0,369129019 | 0,0759636  | -4,859288  | 152 | 2,91E-06 | 1,40E-05 |
| Q8VBU2-2 | LIM and SH3 domain protein 1 {LASP-1}                                                                                                                                                                                                                                                                                     | Laspl        | LASPI_RAT    | -1,454820512 | 0,1951053  | -7,4565913 | 14  | 3,08E-06 | 1,47E-05 |
| Q6B345   | Pirin {EC 1.13.11.24} {Probable quercetin 2,3-dioxygenase PIR} {Probable quercetinase}                                                                                                                                                                                                                                    | Pir          | PIR_RAT      | -1,942915032 | 0,27810953 | -6,9861504 | 16  | 3,07E-06 | 1,47E-05 |
| Q99MZ8   | Guanine nucleotide-binding protein subunit beta-4 (Transducin beta chain 4)                                                                                                                                                                                                                                               | Gnb4         | GBB4_RAT     | 0,320782503  | 0,06599065 | 4,86102939 | 139 | 3,11E-06 | 1,49E-05 |
| QSM827   | Myelin protein PO {Myelin peripheral protein} (MPP) (Myelin protein zero)                                                                                                                                                                                                                                                 | MpzPO        | MYPO_RAT     | -0,654751779 | 0,12753333 | -5,1339661 | 61  | 3,13E-06 | 1,49E-05 |
| 035353   | Chloride intracellular channel protein 1                                                                                                                                                                                                                                                                                  | Clicl        | CLICI_RAT    | 1,461765153  | 0,17057349 | 8,56970884 | 11  | 3,38E-06 | 1,60E-05 |
| P06907   | NADH-cytochrome b5 reductase 2 (bSR-2) (EC 1.6.2.2)                                                                                                                                                                                                                                                                       | Cyb5r2       | NBSR2_RAT    | 0,70362844   | 0,1403725  | 5,01258043 | 74  | 3,56E-06 | 1,68E-05 |

|                                      |                                                                                                                                                                                                                                                                                                        |            |                     |              |            |            |      |          |            |
|--------------------------------------|--------------------------------------------------------------------------------------------------------------------------------------------------------------------------------------------------------------------------------------------------------------------------------------------------------|------------|---------------------|--------------|------------|------------|------|----------|------------|
| Q6MG61                               | Ubiquitin carboxyl-terminal hydrolase 7 (EC 3.4.19.12) (Deubiquitinase) (Herpesvirus-associated ubiquitin-specific protease) (rHAUSP) Usp7                                                                                                                                                             | Usp7_Hausp | UBP7_RAT            | -0,453143335 | 0,08348676 | -5,4277272 | 37   | 3,74E-06 | 1,76E-05   |
|                                      | (Ubiquitin thioesterase 7) (Ubiquitin-specific-processing protease 7)                                                                                                                                                                                                                                  |            |                     |              |            |            |      |          |            |
| Q6AY12                               | Guanine nucleotide-binding protein G(i) subunit alpha-1 (Adenylate cyclase-inhibiting G alpha protein)                                                                                                                                                                                                 | Gnai1      | GNAI1_RAT           | -1,072397645 | 0,10782974 | -9,9452866 |      | 3,75E-06 | 1,76E-05   |
|                                      | Protein disulfide-isomerase A3 (EC 5.3.4.1) (58 kDa glucose-regulated protein) (58 kDa microsomal protein) (p58) (Disulfide isomerase ER-60)                                                                                                                                                           |            |                     |              |            |            |      |          |            |
| Q4VSI4<br>P10824                     | (Endoplasmic reticulum resident protein 57) (ER protein 57) (Erp57) (Endoplasmic reticulum resident protein 60) (ER protein 60) (Erp60) (Hsp70) (Q-2)                                                                                                                                                  | ia3        | Erp60_Grp_PDIA3_RAT | 1,247107419  | 0,24004429 | 5,19532222 | 49   | 3,95E-06 | 1,85E-05   |
|                                      | Protein bassoon                                                                                                                                                                                                                                                                                        | Bsn        | BSN_RAT             | 0,301429466  | 0,05605761 | 5,37713702 | 38   | 4,07E-06 | 1,90E-05   |
| CON_007152                           | Prosaposin receptor GPR37 (G-protein coupled receptor 37) (G-protein coupled receptor CNS1)                                                                                                                                                                                                            | Gpr37      | GPR37_RAT           | 0,601473277  | 0,07170741 | 8,38788175 | 11   | 4,15E-06 | 1,93E-05   |
|                                      |                                                                                                                                                                                                                                                                                                        | Phb        | PHB_RAT             | 0,302764528  | 0,06496832 | 4,66018738 | 378  | 4,39E-06 | 2,03E-05   |
| P11598<br>O88778                     | Prohibitin<br>Thioredoxin, mitochondrial (MTRX) (Mt-Trx) (Thioredoxin in-2)<br>Spectrin beta chain, non-erythrocytic 2 (Beta Spectin 1) (Beta-III spectrin) (Glutamate transporter EAAT4-associated protein 41) (SPNB-3) (SPTN2) (Spectrin-like protein GTRAP41)                                       | Txn2       | Trx2_THIOM_RAT      | 2,120481345  | 0,13617682 | 15,5715298 |      | 4,44E-06 | 2,05E-05   |
| Q9QYC6<br>P67779                     | CBI cannabinoid receptor-1 (teratogen protein 1) (CRIP-1)                                                                                                                                                                                                                                              | Cnrip1     | CNRP1_RAT           | 0,292003373  | 0,05775252 | 5,05611454 | 57   | 4,74E-06 | 2,18E-05   |
|                                      | Transitional endoplasmic reticulum ATPase (TER ATPase) (EC 3.6.4.6) (155 Mg(2+)-ATPase p97 subunit) (Valosin-containing protein) (VCP)                                                                                                                                                                 | Vcp        | TERA_RAT            | -0,393211817 | 0,0505446  | -7,7795019 | 12   | 5,00E-06 | 2,29E-05   |
| P97615                               | Enoyl-CoA delta isomerase 1, mitochondrial (EC 5.3.3.8) (3,2-trans-enoyl-CoA isomerase) (Delta(3),Delta(2)-enoyl-CoA isomerase) (03,02-enoyl-CoA isomerase) (Dodecenoyl-CoA isomerase)                                                                                                                 | Eci1       | ECI1_RAT            | 0,358652739  | 0,07407854 | 4,84151989 | 92   | 5,18E-06 | 2,36E-05   |
|                                      | Coiled-coil domain-containing protein 91 (GGA-binding partner)                                                                                                                                                                                                                                         | ccdc91     | Ggab_CCD91_RAT      | 0,330788712  | 0,04646243 | 7,11948814 | 14   | 5,18E-06 | 2,36E-05   |
| P46462                               | Acetyl-CoA acetyltransferase, mitochondrial (EC 2.3.1.9) (Acetoacetyl-CoA thiolase)                                                                                                                                                                                                                    | Acat1      | THIL_RAT            | -0,294875323 | 0,06437358 | -4,5806884 | 785  | 5,39E-06 | 2,45E-05   |
| P23965<br>Q6AY97                     | Pantothenate kinase 4 (PANK4) (EC 2.7.1.33) (Pantothenate kinase 4)<br>Joubertin (Abelson helper integration site 1 protein homolog) (AHL-1) (Peptidyl-prolyl cis-trans isomerase FKBP1A) (PPIase FKBP1A) (EC 5.2.1.8) (12 kDa FK506-binding protein) (12 kDa FKBP) (FKBP-12) (FK506-binding)          | Pank4      | Fangl_PANK4_RAT     | -0,43174223  | 0,07833597 | -5,5114173 | 30   | 5,50E-06 | 2,49E-05   |
|                                      |                                                                                                                                                                                                                                                                                                        | Ahl1       | AHL1_RAT            | 0,499425133  | 0,06133145 | 8,14305099 | 11   | 5,52E-06 | 2,49E-05   |
|                                      |                                                                                                                                                                                                                                                                                                        | Fkbp1a     | Fkbp1a_FKBP1A_RAT   | 0,351152909  | 0,07572158 | 4,63742175 | 265  | 5,55E-06 | 2,49E-05   |
| P17764                               | protein 1A) (FKBP-1A) (Immunophilin FKBP12) (Rotamase)                                                                                                                                                                                                                                                 | Vdac1      | VDAC1_RAT           | 0,58268755   | 0,09958296 | 5,85127778 | 23   | 5,80E-06 | 2,60E-05   |
|                                      | Voltage-dependent anion-selective channel protein 1 (VDAC-1) (rVDAC1)                                                                                                                                                                                                                                  | 10         | Pmb1OT1_TYBIO_RAT   | 0,984198378  | 0,13516192 | 7,28162493 | 13   | 6,17E-06 | 2,75E-05   |
| Q92358<br>Q6DTM3<br>Q62658           | (Outer mitochondrial membrane protein porin 1)<br>Thymosin beta-10<br>Retinol-1 (Neuroendocrine-specific protein) (5-rex)<br>Dipeptidyl peptidase 2 (EC 3.4.14.2) (Dipeptidyl aminopeptidase II) (Dipeptidyl peptidase 7) (Dipeptidyl peptidase II) (DPP II) (Quiescent cell praline dipeptidase)      | Rtn1       | Nsp_RTN1_RAT        | 0,533120578  | 0,07933393 | 6,71995672 | 15   | 6,87E-06 | 3,06E-05   |
| Q9Z2L0                               |                                                                                                                                                                                                                                                                                                        | Dpp7       | Dpp2_RAT            | 0,178900032  | 0,03899046 | 4,58830276 | 191  | 8,08E-06 | 3,58E-05   |
|                                      |                                                                                                                                                                                                                                                                                                        | Mdr1       | MdrH_MDR1_RAT       | 0,560240134  | 0,11053969 | 5,06822618 | 43   | 8,09E-06 | 3,58E-05   |
| P63312                               | Multidrug resistance protein 1 (EC 3.6.3.44) (ATP-binding cassette subfamily B member 1) (P-glycoprotein 1) (CD antigen CD243)<br>Succinate-semialdehyde dehydrogenase, mitochondrial (EC 1.2.1.24) (Aldehyde dehydrogenase family 5 member A1) (NAD(+)-dependent succinic semialdehyde dehydrogenase) | 1db5al     | Ssadl_SSDH_RAT      | -1,057023751 | 0,20375261 | -5,1877802 | 34   | 9,80E-06 | 4,33E-05   |
|                                      |                                                                                                                                                                                                                                                                                                        |            |                     |              |            |            |      |          |            |
| Q64548-2<br>Q9EPB1                   | Mevlonate kinase (MK) (EC 2.7.1.36)                                                                                                                                                                                                                                                                    | Mvk        | KIME_RAT            | -0,385670388 | 0,08386797 | -4,5985419 | 115  | 1,10E-05 | 4,84E-05   |
| P43245                               | Neural cell adhesion molecule 1 (N-CAM-1) (NCAM-1) (CD antigen CD56)                                                                                                                                                                                                                                   | Ncam1      | Ncam_NCAM1_RAT      | -1,673599321 | 0,32397438 | -5,1658384 | 33   | 1,13E-05 | 4,96E-05   |
| P51650<br>P17256                     | N-acetylglutamate synthetase (NAG synthetase) (N-acetyltransferase 8-like protein) (EC 2.3.1.17)<br>Cysteine-rich protein 2 (CRP-2) (Protein ESPI)                                                                                                                                                     | Nat81      | NAT8L_RAT           | 0,864574     | 0,13557471 | 6,37710366 | 15   | 1,24E-05 | 5,44E-05   |
| P13596                               | Thymosin beta-4 (T beta 4) [Cleaved into: Hematopoietic system regulator y peptide (Seraspenide)]                                                                                                                                                                                                      | Crip2      | Crp2_CRIP2_RAT      | -0,562364527 | 0,11814247 | -4,7600538 | 59   | 1,30E-05 | 5,65E-05   |
|                                      |                                                                                                                                                                                                                                                                                                        | b4x        | Thyb4_Tn_TYB4_RAT   | -0,418330741 | 0,09415279 | -4,4431052 | 227  | 1,39E-05 | 6,02E-05   |
| D3ZVU9<br>P36201                     | Kinesin heavy chain isoform SA (Kinesin heavy chain neuron-specific 1) (Neuronal kinesin heavy chain) (NKH)<br>Tubulin beta-2A chain                                                                                                                                                                   | Kif5a      | KIF5A_RAT           | -0,43611819  | 0,06930778 | -6,2924853 | 15   | 1,44E-05 | 6,25E-05   |
|                                      | Microtubule-associated protein 1B (MAP1B) (Neuraxin) [Cleaved into: MAP1B heavy chain; MAP1 light chain LCI]                                                                                                                                                                                           | Tubb2a     | TBB2A_RAT           | -0,368901852 | 0,06030438 | -6,1173311 | 16   | 1,49E-05 | 6,42E-05   |
| P62329<br>Q6QLM7<br>P85108<br>P15205 | Map1b<br>60S ribosomal protein L11<br>40S ribosomal protein S25                                                                                                                                                                                                                                        | Map1b      | MAPIB_RAT           | 0,885632994  | 0,19754625 | 4,48316795 | 143  | 1,50E-05 | 6,43E-05   |
|                                      |                                                                                                                                                                                                                                                                                                        | Rpl11      | RLI1_RAT            | -0,761335152 | 0,15455133 | -4,9260989 | 40   | 1,50E-05 | 6,43E-05   |
|                                      |                                                                                                                                                                                                                                                                                                        | Rps25      | R525_RAT            | 0,376612355  | 0,06016089 | 6,2600864  | 15   | 1,53E-05 | 6,54E-05   |
| P62914<br>P62853                     | Ubiquitin conjugation factor E4A<br>NAO-dependent protein deacylase sirtuin-5, mitochondrial (EC 3.5.1.-) (Regulatory protein SIR2 homolog 5) (SIR2-like protein 5)                                                                                                                                    | Ube4a      | UBE4A_RAT           | -0,148866413 | 0,03430623 | -4,3393407 | 1309 | 1,54E-05 | 6,57E-05   |
|                                      |                                                                                                                                                                                                                                                                                                        | Sirt5      | SIRS_RAT            | 0,869539931  | 0,18379276 | 4,73108923 | 55   | 1,60E-05 | 6,81E-05   |
| Q6P7A2                               | UPF0364 protein C6orf211 homolog<br>Serine/arginine-rich splicing factor 2 (Splicing component, 35 kDa) (Splicing factor SC35) (SC-35) (Splicing factor, arginine/serine-rich 2)                                                                                                                       | CF211      | CF211_RAT           | -0,660178347 | 0,08635747 | -7,6447158 | 10   | 1,75E-05 | 7,42E-05   |
|                                      | GTP-binding nuclear protein Ran (GTPase Ran) (Ras-like protein TC4) (Ras-related nuclear protein)                                                                                                                                                                                                      | Srsf2      | Sfs2_SRSF2_RAT      | -0,448533073 | 0,07051559 | -6,3607651 | 14   | 1,77E-05 | 7,47E-05   |
| Q68FX9<br>Q6AYT5                     | Dynactin subunit 2<br>Potassium voltage-gated channel subfamily C member 3 (KSHII ID) (Voltage-gated potassium channel subunit Kv3.3)                                                                                                                                                                  | Rao        | RAN_RAT             | -1,317795985 | 0,26662188 | -4,9425651 | 36   | 1,79E-05 | 7,55E-05   |
| Q6PDU1<br>P62828                     |                                                                                                                                                                                                                                                                                                        | Dctn2      | DCTN2_RAT           | -0,461897195 | 0,09881172 | -4,6745184 | 55   | 1,95E-05 | 8,20E-05   |
|                                      | 60S ribosomal protein L27a                                                                                                                                                                                                                                                                             | Kcnc3      | KCNK3_RAT           | 0,3912338    | 0,07740031 | 5,05468015 | 30   | 2,00E-05 | 8,37E-05   |
| Q6AYH5                               | Lo w molecular weight phosphotyrosine protein phosphatase (LMW-PTP) (LMW-PTPase) (EC 3.1.3.48) (Low molecular weight cytosolic acid phosphatase) (EC 3.1.3.2)                                                                                                                                          | Rpl27a     | RL27A_RAT           | 0,500174079  | 0,10657603 | 4,69311994 | 51   | 2,06E-05 | 8,61E-05   |
|                                      |                                                                                                                                                                                                                                                                                                        | Acpl1      | PPAC_RAT            | -0,448661088 | 0,1034217  | -4,3381718 | 222  | 2,18E-05 | 9,10E-05   |
| Q01956<br>P18445                     | Kinesin heavy chain isoform SC (Kinesin heavy chain neuron-specific 2) (Fragment)<br>T-complex protein 1 subunit delta (TCP1-delta) (CCT-delta)                                                                                                                                                        | Kif5c      | Nkhe2_KIF5C_RAT     | 0,623331027  | 0,07789002 | 8,00270746 |      | 2,21E-05 | 9,18E-05   |
| P41498-2                             | Inositol monophosphatase 1 (IMP1) (IMPase 1) (EC 3.1.3.25) (Inositol-1-(or 4)-monophosphatase 1) (Lithium-sensitive myo-inositol monophosphatase A1)                                                                                                                                                   | Cct4       | TCPD_RAT            | -0,506498979 | 0,10100558 | -5,0145644 | 30   | 2,24E-05 | 9,22E-05   |
|                                      |                                                                                                                                                                                                                                                                                                        | Imp1a      | IMP1A_RAT           | -0,720933522 | 0,08217364 | -8,7732947 |      | 2,23E-05 | 9,22E-05   |
| P56536<br>Q7TPB1                     | ER membrane protein complex subunit 2 (Teatriconcept ide repeat protein 35) (TPR repeat protein 35)                                                                                                                                                                                                    | Emc2       | Tic35 EMC2_RAT      | -0,513667742 | 0,08492556 | -6,0484472 | 15   | 2,23E-05 | 9,22E-05   |
| P97697<br>B0BNG0<br>P60868           | 40S ribosomal protein S20<br>Alpha-1-macroglobulin (Alpha-1-M) (Alpha-1-macroglobulin 165 kDa subunit) [Cleaved into: Alpha-1-macroglobulin 45 kDa subunit]<br>Beta-synuclein (Phosphonucleoprotein 14) (PNP 14)                                                                                       | Rps20      | R520_RAT            | 0,320662618  | 0,0743908  | 4,31051421 | 280  | 2,26E-05 | 9,28E-05   |
|                                      |                                                                                                                                                                                                                                                                                                        | Alm        | Pzp_AIM_RAT         | -0,568150257 | 0,1285325  | -4,4202848 | 104  | 2,43E-05 | 9,95E-05   |
|                                      |                                                                                                                                                                                                                                                                                                        | Sncb       | SYUB_RAT            | 0,26385276   | 0,04515734 | 5,84296445 | 16   | 2,50E-05 | 0,00010205 |
|                                      | Eukaryotic translation initiation factor 5 (eIF-5)                                                                                                                                                                                                                                                     | Eif5       | IFS_RAT             | 0,414586641  | 0,09296531 | 4,45958433 | 84   | 2,53E-05 | 0,00010293 |
| Q63041                               | Inosine triphosphate pyrophosphatase (ITPase) (Inosine triphosphatase) (EC 3.6.1.19) (Non-canonical purine NTP pyrophosphatase) (Non-standard purine NTP pyrophosphatase) (Nucleoside-triphosphate pyrophosphatase) (NTPase)                                                                           | Itpa       | ITPA_RAT            | 0,227738752  | 0,05350437 | 4,25645124 | 429  | 2,55E-05 | 0,00010377 |
| Q63754                               | Elongation factor G, mitochondrial (EF-Gmt) (Elongation factor G1, mitochondrial) (mEF-G1) (Elongation factor G1)                                                                                                                                                                                      | 111        | Efg_Efg1_G_EFGM_RAT | -0,504354729 | 0,11391687 | -4,4273928 | 94   | 2,57E-05 | 0,00010422 |
| Q07205<br>D3ZW55                     | Secretogranin-1 (Chromogranin-B) (CgB) (Glucagonoma peptide) (Secretogranin-1) (Sgl) [Cleaved into: CCB peptide short form; CCB peptide long form]                                                                                                                                                     | Chgb       | SCGI_RAT            | -0,463296218 | 0,1035846  | -4,4726363 | 77   | 2,63E-05 | 0,00010588 |
| Q07803                               | 60S ribosomal protein L18a<br>NADH-ubiquinone oxidoreductase chain 3 (EC 1.6.5.3) (NADH dehydrogenase subunit 3)                                                                                                                                                                                       | Rpl18a     | RL18A_RAT           | -0,232001057 | 0,05132007 | -4,5206694 | 66   | 2,62E-05 | 0,00010588 |
|                                      |                                                                                                                                                                                                                                                                                                        | nd3        | mt-Nd3_II_NU3M_RAT  | -0,442661042 | 0,05170223 | -8,5617391 |      | 2,67E-05 | 0,00010735 |
| 035314<br>P62718                     | CD81 antigen (26 kDa cell surface protein TAPA-1) (Target of the antiproliferative antibody 1) (CD antigen CD81)<br>Sulfated glyco protein 1 (SGP-1) (Prosaposin)                                                                                                                                      | Cd81       | Tapal_CD81_RAT      | 0,75820881   | 0,15486698 | 4,89587147 | 32   | 2,69E-05 | 0,00010778 |
|                                      |                                                                                                                                                                                                                                                                                                        | Psap       | Sgpl_SAP_RAT        | 0,354207721  | 0,07865652 | 4,50322164 | 67   | 2,74E-05 | 0,0001097  |

|            |                                                                                                                                                                                                                                                                                                                                  |             |              |              |            |            |     |            |            |
|------------|----------------------------------------------------------------------------------------------------------------------------------------------------------------------------------------------------------------------------------------------------------------------------------------------------------------------------------|-------------|--------------|--------------|------------|------------|-----|------------|------------|
| P05506     | Cellular nucleic acid-binding protein (CNBP) (Zinc finger protein 9)<br>14-3-3 protein gamma [Cleaved into: 14-3-3 protein gamma, N-terminally processed]                                                                                                                                                                        | Cnbp Znf9   | CNBP_RAT     | 0,394997208  | 0,05771609 | 6,843797   | 11  | 2,79E-05   | 0,00011079 |
| Q62745     | NADH dehydrogenase [ubiquinone] 1 alpha subcomplex subunit 5<br>(Complex 1 subunit B13) (Complex 1-13 kD-B) (C1-13 kD-B) (NADH-ubiquinone oxidoreductase 13 kDa-B subunit)                                                                                                                                                       | Ywhag       | 1433G_RAT    | 0,758642746  | 0,15610538 | 4,85981175 | 33  | 2,79E-05   | 0,00011079 |
| P10960     | Tissue alpha-L-fucosidase (EC 3.2.1.51) (Alpha-L-fucosidase 1) (Alpha-L-fucoside fucosylase 1) (Alpha-L-fucosidase 1)                                                                                                                                                                                                            | Ndufa5      | NDUA5_RAT    | -0,487016389 | 0,11248043 | -4,3297879 | 128 | 2,98E-05   | 0,00011832 |
| P62634     | Tropomodulin-2 (Neuronal tropomodulin) (N-Tmod)                                                                                                                                                                                                                                                                                  | Fucal Fuca  | FUCO_RAT     | 0,787058497  | 0,08337741 | 9,43970934 |     | 3,12E-05   | 0,00012353 |
| P61983     | Serine/threonine-protein phosphatase 2A catalytic subunit beta isoform (PP2A-beta) (EC 3.1.3.16)                                                                                                                                                                                                                                 | rmod2 Ntmoc | TMOD2_RAT    | -0,561792814 | 0,13281778 | -4,2298014 | 292 | 3,13E-05   | 0,00012355 |
| Q63362     | Golgi reassembly-stacking protein 2 (GRS2) (Golgi reassembly-tackling protein of 55 kDa) (GRASP55)                                                                                                                                                                                                                               | Ppp2cb      | PP2AB_RAT    | -0,720590467 | 0,12035984 | -5,9869678 | 14  | 3,33E-05   | 0,00013088 |
| P17164     |                                                                                                                                                                                                                                                                                                                                  | Gorasp2     | GORS2_RAT    | -0,680968177 | 0,11416882 | -5,9645723 | 14  | 3,46E-05   | 0,00013565 |
| CON_007006 | Lanosterol 14-alpha demethylase (LDM) (EC 1.1.4.13.70) (CYP14) (Cytochrome P450 51A1) (Cytochrome P450-14DM) (Cytochrome P45014DM) (Cytochrome P450U) (Sterol 14-alpha demethylase)                                                                                                                                              | yp51a1 Cyp5 | CP51A_RAT    | -1,908785438 | 0,30147595 | -6,3314683 | 12  | 3,77E-05   | 0,0001473  |
| P70566     | Mitochondrial inner membrane protein (Mitofilin) (Fragment)                                                                                                                                                                                                                                                                      | Immt        | IMMT_RAT     | 0,372946152  | 0,08640914 | 4,31604985 | 95  | 3,89E-05   | 0,00015187 |
| P62716     | WO repeat-containing protein 61 [Cleaved into: WO repeat -containing protein 61, N-terminally processed]                                                                                                                                                                                                                         | Wdr61       | WDR61_RAT    | 0,294024108  | 0,05281525 | 5,56703066 | 16  | 4,25E-05   | 0,00016535 |
| Q9R064     | Amyloid beta A4 precursor protein-binding family A member 1 (Adapter protein Xlalpha) (Neuron-specific XII protein) (Neuronal Munc18-1) (N-munc18 interacting protein 1) (Mint-1)                                                                                                                                                | ApbA1       | APBA1_RAT    | 0,473639005  | 0,0834166  | 5,67799494 |     | 4,38E-05   | 0,00017001 |
| Q64654     | Large neutral amino acids transporter small subunit 1 (4F2 light chain) (4F2 LC) (4F2LC) [Integral membrane protein E16] (Protein in TAI) (L-type: 7a5 Mpe16 TAI)                                                                                                                                                                | LAT1        | LAT1_RAT     | -0,948352992 | 0,13909644 | -6,8179529 | 10  | 4,64E-05   | 0,00017939 |
| Q3KR86     | amino acid transporter 1 (Solute carrier family 7 member 5)                                                                                                                                                                                                                                                                      | Prva        | PRVA_RAT     | 0,309968772  | 0,06856851 | 4,52057006 | 43  | 4,78E-05   | 0,00018452 |
| Q4V7A0     | Nucleobindin-2 [DNA-binding protein NEFA] (Prepronesfatin) [Cleaved into: Nesfatin-1]                                                                                                                                                                                                                                            | Nuch2 Nefa  | NUCB2_RAT    | 0,493235116  | 0,10978482 | 4,9274428  | 40  | 5,87E-05   | 0,00022571 |
| Q35430     | Calnexin                                                                                                                                                                                                                                                                                                                         | Canx        | CALX_RAT     | 0,552674427  | 0,0839037  | 6,58700886 | 10  | 6,18E-05   | 0,0002371  |
| Q63016     | Aldose 1-epimerase (EC 5.1.3.3) (Galactose mutarotase)                                                                                                                                                                                                                                                                           | Galm        | GALM_RAT     | 0,342562488  | 0,04885263 | 7,01216023 |     | 6,24E-05   | 0,00023886 |
| P02625     | Dystrobrein beta (DTN-B) (Beta-dystrobrein)                                                                                                                                                                                                                                                                                      | Dtnb        | DTNB_RAT     | -0,439495881 | 0,1071589  | -4,1013474 | 164 | 6,45E-05   | 0,00024634 |
| Q9J185     | Alanine-tRNA ligase, cytoplasmic (EC 6.1.1.7) (Alanyl-tRNA synthetase) (AlaRS)                                                                                                                                                                                                                                                   | Aars        | SYAC_RAT     | -0,554059875 | 0,07324261 | -7,564721  |     | 6,52E-05   | 0,00024814 |
| P35565     | Acylpyruvate FAHDL, mitochondrial (EC 3.7.1.5) (Fumarylacetoacetate hydrolase domain-containing protein 1)                                                                                                                                                                                                                       | Fahdl       | FAHDL_RAT    | -0,414003445 | 0,10221944 | -4,0501439 | 277 | 6,65E-05   | 0,00025255 |
| Q66HG4     | Syntaxin-7                                                                                                                                                                                                                                                                                                                       | Stx7        | STX7_RAT     | -0,299739238 | 0,07021221 | -4,269047  | 62  | 6,85E-05   | 0,00025946 |
| P84060     | Xaa-Pro dipeptidase (X-Pro dipeptidase) (EC 3.4.13.9) (Imidodipeptidase) (Peptidase D) (Praline dipeptidase) (Proliase)                                                                                                                                                                                                          | Pepd        | PEPD_RAT     |              |            |            |     |            |            |
| P50475     | PDZ domain-containing protein GIPC1 (GAIP -terminus-interacting protein) (GLUT1 C-terminal-binding protein) (GLUTICBP) (RGS-GAIP-interacting protein) (RGS19-interacting protein 1) (Synectin)                                                                                                                                   | Gipc1       | GIPC1_RAT    | -1,09744444  | 0,18501954 | -5,9315055 | 12  | 6,91E-05   | 0,00026095 |
| Q6AYQ8     | Protein IMPACT [Imprinted and ancient gene protein homolog]                                                                                                                                                                                                                                                                      | Impact      | IMPACT_RAT   | -0,19333088  | 0,04872361 | -3,9679096 | 686 | 8,01E-05   | 0,00030185 |
| Q70257     | Very-long-chain enoyl-CoA reductase (EC 1.3.1.93) (Synaptic glycoprotein SC2) (Trans-2,3-enoyl-CoA reductase) (TER)                                                                                                                                                                                                              | Teer Gpsn2  | TECR_RAT     | -0,571473888 | 0,08956825 | -6,3803175 | 10  | 8,03E-05   | 0,00030185 |
| Q51007     | Malectin                                                                                                                                                                                                                                                                                                                         | Mlec        | MLEC_RAT     | 0,481249048  | 0,11389641 | 4,22532243 | 59  | 8,39E-05   | 0,00031441 |
| Q9Z254     | Glyceraldehyde-3-phosphate dehydrogenase (GAPDH) (EC 1.2.1.12) (38 kDa BFA-dependent ADP-ribosylation substrate) (BARS-38) (Peptidyl-cysteine 5-nitrosylase GAPDH) (EC 2.6.99.-)                                                                                                                                                 | Gapdh       | GAPD_G3P_RAT | -0,271269288 | 0,06689258 | -4,0552969 | 132 | 8,51E-05   | 0,00031824 |
| Q5GFD9     | AP-2 complex subunit mu (AP-2 mu chain) (Adaptor protein complex AP-2 subunit mu) (Adaptor-related protein complex 2 subunit mu) (Clathrin assembly protein complex 2 mu medium chain) (Clathrin coat assembly protein AP50) (Clathrin coat-associated protein AP50) (Mu2-adaptin) (Plasma membrane adaptor AP-2 50 kDa protein) | Ap2m1       | AP2M1_RAT    | -0,929573752 | 0,17145223 | -5,4217653 | 14  | 9,00E-05   | 0,00033564 |
| Q64232     | Kinesin-like protein KIF27                                                                                                                                                                                                                                                                                                       | Kif27       | KIF27_RAT    | 0,49193129   | 0,12312648 | 3,99533303 | 174 | 9,52E-05   | 0,00035419 |
| Q5FVQ4     | Four and a half LIM domains protein 1 (FHL-1)                                                                                                                                                                                                                                                                                    | Fhl1        | FHL1_RAT     | 0,85499593   | 0,19286594 | 4,43310991 | 33  | 9,70E-05   | 0,00035967 |
| P04797     | Hippocalcin-like protein 4 [Neural visinin-like protein 2] (NVL-2) (NVP-2) [Visinin-like protein 2] (VILIP-2)                                                                                                                                                                                                                    | Hpcal4      | HPCL4_RAT    | -0,68980744  | 0,14534993 | -4,7458394 | 22  | 9,77E-05   | 0,00036135 |
| P84092     | Oligoribonuclease, mitochondrial (EC 3.1.-.-) (RNA exonuclease 2 homolog) (Small fragment nuclease)                                                                                                                                                                                                                              | Rexo2 Smfn  | ORN_RAT      | -0,643222625 | 0,16332955 | -3,938189  | 305 | 0,00010179 | 0,00037566 |
|            | Hydroxyacyl-coenzyme A dehydrogenase, mitochondrial (HCDH) (EC 1.1.1.35) [Medium and short-chain L-3-hydroxyacyl-coenzyme A dehydrogenase] (Short-chain L-3-hydroxyacyl-CoA dehydrogenase)                                                                                                                                       | Had hsdh    | HCDH_RAT     | 0,263144246  | 0,06667581 | 3,94662251 | 235 | 0,00010473 | 0,00038552 |
| CON_007119 | Cofilin-1 [Cofilin, non-muscle isoform]                                                                                                                                                                                                                                                                                          | Cfil1       | COF1_RAT     | -0,606543955 | 0,15130656 | -4,0087089 | 119 | 0,00010689 | 0,00039247 |
| Q9WU44     | Paralemm-1 (Paralemm-1)                                                                                                                                                                                                                                                                                                          | Palm        | PALM_RAT     | -0,609599413 | 0,11450662 | -5,3237046 | 14  | 0,00010745 | 0,00039353 |
| P35332     | Nuclear protein localization protein 4 homolog (Protein NPL4)                                                                                                                                                                                                                                                                    | Nplc4 Npl4  | NPL4_RAT     | 0,607506463  | 0,05531931 | 10,9818165 |     | 0,00010892 | 0,0003979  |
| Q5U1X1     | Valine-tRNA ligase (EC 6.1.1.9) (Valyl-tRNA synthetase) (ValRS)                                                                                                                                                                                                                                                                  | Vars Vars2  | SYVC_RAT     | 0,574115787  | 0,12764559 | 4,49773291 | 28  | 0,00010933 | 0,00039839 |
| Q9VVK7     | V-type proton ATPase subunit F (V-ATPase subunit F) (V-ATPase 14 kDa subunit) (Vacuolar proton pump subunit F)                                                                                                                                                                                                                   | Vatf5       | VATF_RAT     | -2,137521902 | 0,41358791 | -5,1682407 | 15  | 0,00011451 | 0,00041622 |
| P45592     | Aconitate hydratase, mitochondrial (Aconitase) (EC 4.2.1.3) (Citrate hydro-lyase)                                                                                                                                                                                                                                                | Aco2        | ACON_RAT     | -2,605457482 | 0,55162423 | -4,723247  | 21  | 0,0001155  | 0,00041771 |
| Q920Q0     | Golgi resident protein GCP60 (Acyl-CoA-binding domain-containing protein 3) (DMT1-associated protein) (OAP) (Golgi complex-associated Acb3 Gcp60 GCP60) (GOLPH1)                                                                                                                                                                 | Gcp60       | GCP60_RAT    | -1,158054073 | 0,28344609 | -4,0856237 | 70  | 0,00011541 | 0,00041771 |
| Q9E554     | 40S ribosomal protein S28                                                                                                                                                                                                                                                                                                        | Rps28       | RS28_RAT     | 0,416281349  | 0,09560977 | 4,35396257 | 34  | 0,00011614 | 0,00041898 |
| Q04462     | Electron transfer flavoprotein subunit alpha, mitochondrial (Alpha-H F)                                                                                                                                                                                                                                                          | EtfA        | ETFA_RAT     | -0,509827215 | 0,11926912 | -4,2745952 | 39  | 0,00011946 | 0,00042989 |
| P50408     | Heat shock 70 kDa protein 4 (Ischemia responsive 94 kDa protein)                                                                                                                                                                                                                                                                 | Hspa4 Hsp94 | HSP74_RAT    | -0,215315942 | 0,05549253 | -3,8800884 | 328 | 0,00012622 | 0,00045306 |
| Q9ER34     | KATS regulatory NSL complex subunit 3 (NSL complex protein NSL3) (Non-Kans specific lethal 3 homolog)                                                                                                                                                                                                                            | Kans1       | KANL3_RAT    | -0,359776295 | 0,08972073 | -4,0099571 | 85  | 0,00012999 | 0,00046547 |
| Q7TNY6     | Protein phosphatase methyltransferase 1 (PM-E1) (EC 3.1.1.89)                                                                                                                                                                                                                                                                    | Ppmel       | PPME1_RAT    | -0,257100744 | 0,06699587 | -3,8375613 | 815 | 0,00013387 | 0,00047816 |
| P62859     | 60S ribosomal protein L30                                                                                                                                                                                                                                                                                                        | Rpl30       | RL30_RAT     | -0,951813888 | 0,1276164  | -7,4583978 |     | 0,00014221 | 0,00050667 |
| P13803     | Ribosylidihydroxynicotinamide dehydrogenase [quinone] (EC 1.10.99.2) [NRH dehydrogenase [quinone] 2] (NRH:quinone oxidoreductase 2) [Quinone reductase 2] (QR2)                                                                                                                                                                  | Nqo2        | NQO2_RAT     | 0,271053368  | 0,05528028 | 4,90325613 | 16  | 0,00015915 | 0,00056564 |
| Q88600     | 26S proteasome non-ATPase regulatory subunit 1 (26S proteasome regulatory subunit RPN2) (26S proteasome regulatory subunit 51) (26S proteasome subunit p112)                                                                                                                                                                     | Psm1        | PSMD1_RAT    | -0,451073355 | 0,11778931 | -3,8294932 | 255 | 0,00016168 | 0,00057144 |
| Q3KR73     | Fatty aldehyde dehydrogenase (EC 1.2.1.3) (Aldehyde dehydrogenase 4) [Aldehyde dehydrogenase family 3 member A2] (Microsomal aldehyde dehydrogenase) (msALDH)                                                                                                                                                                    | Ldh3a2      | AL3A2_RAT    | -1,168662732 | 0,23873264 | -4,8952783 | 16  | 0,00016174 | 0,00057144 |
| Q4FZT2     | Copine-9 [Copine IX]                                                                                                                                                                                                                                                                                                             | Cpne9       | CPNE9_RAT    |              |            |            |     |            |            |



|        |                                                                                                                                                                         |         |                 |  |              |            |            |     |                       |
|--------|-------------------------------------------------------------------------------------------------------------------------------------------------------------------------|---------|-----------------|--|--------------|------------|------------|-----|-----------------------|
|        | Homeodomain-only protein (Global ischemia-induced gene 15B protein) [Gig15b] (Odd homeobox protein 1)                                                                   | Abhd14b | ABHEB_RAT       |  |              |            |            |     |                       |
| P62890 |                                                                                                                                                                         |         |                 |  | 0,303822401  | 0,07729613 | 3,93062909 | 83  | 0,00017475 0,00061505 |
| Q6AY80 | Alpha/beta hydrolase domain-containing protein 14B (Abhydrolase domain-containing protein 14B) (EC 3.-.-.-)                                                             | Abhd14b | ABHEB_RAT       |  | 0,242000587  | 0,05863846 | 4,12699458 | 40  | 0,00018103 0,0006356  |
|        | ATP-dependent (S)-NAD (P)H-hydrate dehydratase (EC 4.2.1.93) (ATP-dependent NAD(P)HX dehydratase) (Ca ribohydrate kinase domain-containing protein)                     | Carld   | NNRD_RAT        |  | -1,396292558 | 0,06125461 | -22,794899 |     | 0,00018491 0,00064763 |
| 088761 | Phosphatidylethanolamine-binding protein 1 (PEB P-1) (23 kDa morphine-binding protein) (HCNPpp) (P23K) [Cleaved into: Hippocampal cholinergic enhancing peptide (HCNP)] |         |                 |  | -0,178512706 | 0,04707832 | -3,7918243 | 232 | 0,00019075 0,00066646 |
| P30839 |                                                                                                                                                                         |         |                 |  | -0,317677347 | 0,08242363 | -3,8542024 | 104 | 0,00020124 0,00070144 |
| Q5BJ57 | Sideroflexin-3                                                                                                                                                          | Sfxn3   | SFXN3_RAT       |  | -0,244800207 | 0,05158664 | -4,7454191 | 16  | 0,00021947 0,00076312 |
|        | Vesicle-associated membrane protein 7 (VAMP-7) (Synaptobrevin-like protein 1)                                                                                           | Vamp7   | Sybl1 VAMP7_RAT |  | -0,281114117 | 0,04745041 | -5,9243766 |     | 0,00022226 0,00077097 |
| Q78ZRS | Endophilin-B1 (SH3 domain-containing GRB2-like protein B1)                                                                                                              | Sh3glb1 | SHLB1_RAT       |  | -0,449377356 | 0,11162546 | -4,0257605 | 41  | 0,00023905 0,00082721 |
| Q6DGG1 |                                                                                                                                                                         |         |                 |  |              |            |            |     |                       |

|            |                                                                                                                                                                                                                                                                                                                                                |                          |              |            |            |     |            |            |
|------------|------------------------------------------------------------------------------------------------------------------------------------------------------------------------------------------------------------------------------------------------------------------------------------------------------------------------------------------------|--------------------------|--------------|------------|------------|-----|------------|------------|
|            | COP9 signalosome complex subunit 1 (SGN1) (Signalosome sub unit 1) (G protein pathway suppressor 1) (GPS-1) (JAB1 -containing signalosome subunit 1) (MFH protein)                                                                                                                                                                             | >S1 Cpsl1 Csl1 CSN1_RAT  | -0,853152659 | 0,13603967 | -6,2713522 |     | 0,0002401  | 0,00082885 |
| 04AATT     | Macrophage migration inhibitory factor (MIF) (EC 5.3.2.1) (Glutathione-binding 13 kDa protein) (L-dopachrome isomerase) (L-dopachrome tautomerase) (EC 5.3.3.12) (Phe nylpyruvate tautomerase)                                                                                                                                                 | Mif MIF_RAT              | -0,417647548 | 0,11227745 | -3,7197812 | 228 | 0,0002511  | 0,00086478 |
| P31044     | Phospholemman (FXYP domain -containing g ion transport regulator 1)                                                                                                                                                                                                                                                                            | Fxyd1 Plm PLM_RAT        | 0,298749075  | 0,0616307  | 4,84740666 | 14  | 0,00025851 | 0,00088818 |
| Q9JHY2     | Nuclear transport factor 2 (NTF-2)                                                                                                                                                                                                                                                                                                             | Nutf2 Ntf2 NTF2_RAT      | 0,269161645  | 0,05099005 | 5,27870925 | 11  | 0,0002608  | 0,00089391 |
| Q9JHW5     | Ephrin type-B receptor 6 (Tyrosine -pro tein kinase-defective receptor EPH-6)                                                                                                                                                                                                                                                                  | Ephb6 EPHB6_RAT          | -0,282352436 | 0,07155021 | -3,9462142 | 46  | 0,00026954 | 0,00091949 |
| Q6AYE2     | Alpha-1-inhibitor 3 (Alpha-1-inhibitor 3 variant II) (Alpha-I-inhibitor III)                                                                                                                                                                                                                                                                   | Ali3 Mugl A113_RAT       | 0,574121129  | 0,15250421 | 3,76462487 | 110 | 0,00026953 | 0,00091949 |
| P97834     | Beta,beta-carotene 15,15'-monooxygenase (EC 1.14.99.36) (Beta-carotene dioxygenase 1)                                                                                                                                                                                                                                                          | I101 Bedo Bed BCDO1_RAT  | -0,73594847  | 0,17683373 | -4,1618104 | 28  | 0,0002719  | 0,00092325 |
| CON_000213 | Ribonuclease UK114 (EC 3.1.-.-) (14.5 kDa translatio nal inhibitor protein) (Perchloric acid sub - protein)                                                                                                                                                                                                                                    | Hsp12 Psp1 UK114_RAT     | -0,488534709 | 0,12977602 | -3,764445  | 108 | 0,00027192 | 0,00092325 |
| P30904     | Gap junction alpha-1 protein (Connexin -in-43) (Cx43) (Gap junction 43 kDa heart protein)                                                                                                                                                                                                                                                      | Gjal Cxn-43 CXA1_RAT     | 1,080953202  | 0,12070434 | 8,95537956 |     | 0,00028943 | 0,0009804  |
| 008589     | Serine protease inhibitor A3N (Serpin A3N) (CPI-2) (Co nt ra psin-like protease inhibitor 6) (SPI-2.2) (Seri ne protease inhibitor 3) (SPI-3)                                                                                                                                                                                                  | Irp ina3n Spin SPA3N_RAT | -0,364614318 | 0,09631541 | -3,7856282 | 75  | 0,00030676 | 0,0010366  |
| P61972     | Sodium - and chloride-dependent GABA transporter 1 (GAT-1) (Solute carrier family 6 member 1)                                                                                                                                                                                                                                                  | I Gabt1 Gat-1 SC6A1_RAT  | 0,693991833  | 0,16969236 | 4,08970588 | 29  | 0,00031341 | 0,00105666 |
| POCOK7     | Actin- related protein 2/3 comp lex subunit 1B (Ar p2/3 comp lex 41 kDa subunit) (p41-ARC)                                                                                                                                                                                                                                                     | Arpc1b ARC1B_RAT         | -0,680443732 | 0,17611731 | -3,8635823 | 49  | 0,0003284  | 0,00110463 |
| P14046     | Protein twenty two homolog 1                                                                                                                                                                                                                                                                                                                   | Ttyhl TTYH1_RAT          | 1,146928743  | 0,20627844 | 5,56009985 |     | 0,00035183 | 0,00118067 |
| Q91XT5     | Heat shock-related 70 kDa protein 2 (Heat shock protein 70.2) (Testis-specific heat shock protein-related) (HST)                                                                                                                                                                                                                               | Hspa2 Hst70 HSP72_RAT    | -0,311060892 | 0,08358129 | -3,7216569 | 84  | 0,00035687 | 0,0011948  |
| P52759     | Eukaryotic initiation factor 4A-II (eIF4A-II) (eIF4A-II) (EC 3.6.4.13) (ATP-dependent RNA helicase eIF4A-2)                                                                                                                                                                                                                                    | Eif4a2 IF4A2_RAT         | 0,420482863  | 0,11513909 | 3,65195583 | 140 | 0,00036681 | 0,00122523 |
| P08050     | CD59 glycoprotein [MAC-inhibitory protein] [MAC-1P] (Membrane attack complex inhibition factor) (MACIF) (Protectin) (C D antigen CD59)                                                                                                                                                                                                         | Cd59 CD59_RAT            | -0,655304805 | 0,16643412 | -3,9373226 | 35  | 0,00037412 | 0,00124678 |
| P09006     | Gelsolin [Actin-depolymerizing factor] (ADF) (Brevin)                                                                                                                                                                                                                                                                                          | Gsn GELS_RAT             | -0,60520316  | 0,15954824 | -3,7932299 | 54  | 0,00037743 | 0,00125491 |
| P23978     | 14-3-3 protein theta (14 -3-3 protein tau)                                                                                                                                                                                                                                                                                                     | Ywhaq 14337_RAT          | -0,595432762 | 0,10161876 | -5,8594766 | 8   | 0,00037869 | 0,00125621 |
| 088656     | Ool ic hyl- di phospho li gosaccha ride- prote i n glycosyl tra ns ferase subunit 2 (EC 2.4.99.18) (Dol ic hyl- di phospho hoo li gosacchar ide- prote i n glycosyl tra nsferase 63 kDa subunit) (Ribophorin II) (RPN-11) (Ribophorin-2)                                                                                                       | Rpn2 RPN2_RAT            | 0,501440201  | 0,11778999 | 4,25706969 | 20  | 0,00038568 | 0,00127353 |
| P0C5X8     | Multifunctional protein ADE2 (Inclu des: Phosphoribosylaminoimidazole-succinocarboxamide synthase (EC 6.3.2.6) (SAICAR synthetase); Phosphoribosylaminoimidazole carboxylase (EC 4.1.1.21) (AIR carboxylase) (AIRC))                                                                                                                           | 'aicsAde2 Air PUR6_RAT   | -0,480511161 | 0,13168515 | -3,6489396 | 125 | 0,00038529 | 0,00127353 |
| P14659     | DnaJ homolog subfamily A member 1 (Dn aJ-like protein 1) (Heat shock protein J2) (HSJ-2)                                                                                                                                                                                                                                                       | najal Hsj2 Rd DNJ1_RAT   | -0,407123622 | 0,11295084 | -3,6044321 | 216 | 0,0003884  | 0,0012796  |
| QSRK11     | UDP- g lu cose 4-epimerase (EC 5.1.3.2) (G alactosa ldenase) (UDP- galactose 4-epimerase)                                                                                                                                                                                                                                                      | Gale GALE_RAT            | 0,493284287  | 0,12667881 | 3,89397628 | 35  | 0,00042378 | 0,00139298 |
| P27274     | (-reactive protein                                                                                                                                                                                                                                                                                                                             | Crp Ptxl CRP_RAT         | 0,643789907  | 0,13024131 | 4,94305446 | 11  | 0,00044045 | 0,00144448 |
| Q68FP1-2   | Tumor protein p63-regulated gene I-like protein (Mossy fiber terminal-associated vertebrate-spec ific presynaptic protein)                                                                                                                                                                                                                     | T rgll Mover TPRGL_RAT   | 0,49060336   | 0,13452809 | 3,64684703 | 85  | 0,0004567  | 0,00149436 |
| P68255     | Endoplasmic reticulum resident protein 29 (Erp29) (Endoplasmic reticulum resident protein 31) (Erp31)                                                                                                                                                                                                                                          | Erp29 ERP29_RAT          | -0,53744567  | 0,14372114 | -3,7395032 | 51  | 0,00046779 | 0,00152719 |
| P25235     | Thioredoxin-dependent peroxide reductase, mitochondria l (EC 1.11.1.15) (Prx III) (Peroxiredoxin-3) (PRX-3)                                                                                                                                                                                                                                    | Prdx3 PRDX3_RAT          | -0,39092919  | 0,10903974 | -3,5851991 | 135 | 0,00046953 | 0,00152941 |
| P51583     | Le ucine -ric h repeat -conta i ning protein 56                                                                                                                                                                                                                                                                                                | Lrrc56 LRC56_RAT         | -0,836726313 | 0,20254332 | -4,1310981 | 21  | 0,00047492 | 0,00154349 |
| P63036     | Hi ppocalci n-li ke protein 1 (Neural visinin-like protein 3) (NVL-3) (NVP-3) (Visi nin-li ke protein 3) (VIUP-3)                                                                                                                                                                                                                              | Hpcall HPLC1_RAT         | -0,890808221 | 0,22076796 | -4,035043  | 24  | 0,00048224 | 0,00156375 |
| P18645     | Melanoma-associated antigen 01 (MAGE-01 antigen) (Neuro trophin receptor-i ntera cting MAGE hom olog) (Sertoli cell neodin-related gene protein 1) (SNERG-1)                                                                                                                                                                                   | viaged1 Nrag1MAGD1_RAT   | 0,356827456  | 0,09043431 | 3,94570872 | 28  | 0,00048596 | 0,0015723  |
| P48199     | 40S ribosomal protein S21                                                                                                                                                                                                                                                                                                                      | Rps21 RS21_RAT           | -1,474911335 | 0,38604394 | -3,8205789 | 37  | 0,00049259 | 0,00158661 |
| A8WCF8     | Glutamine synthetase (GS) (EC 6.3.1.2) (Glu tamate d ecarboxylase) (EC 4.1.1.15) (Glu tamate-ammon ia li gase)                                                                                                                                                                                                                                 | Gln1 Glns GLNA_RAT       | 0,194703351  | 0,05310327 | 3,66650389 | 66  | 0,00049227 | 0,00158661 |
| PS2555     | Integrin alpha-1 (CD49 antigen-like family member A) (Laminin and co llagen receptor) (VLA-1) (CD antigen CD49a)                                                                                                                                                                                                                               | Itga1 ITA1_RAT           | -0,43474088  | 0,12156454 | -3,5762144 | 124 | 0,00049796 | 0,00160034 |
| Q9Z0V6     | Proteasome sub unit beta type-7 (EC 3.4.25.1) (Macropain chain Z) (Multicatalytic endopeptidase complex chain Z) (Proteasome subunit Z)                                                                                                                                                                                                        | Psmb7 PSB7_RAT           | 0,58132305   | 0,08636341 | 6,73112686 |     | 0,00052333 | 0,00167815 |
| Q4V8C9     | 40S ribosomal protein S7 (S8)                                                                                                                                                                                                                                                                                                                  | Rps7 RS7_RAT             | -0,38671092  | 0,10606799 | -3,6458777 | 64  | 0,00053627 | 0,00171583 |
| P62749     | Protein disulfide-isomerase A4 (EC 5.3.4.1) (Calcium-binding protein 2) (CaBP2) (Endoplasmic reticulum resident protein 70) (ER protein 70) (ERp70) (Endoplasm ic reticulum resident protein 72) (ER protein 72) (ERp72)                                                                                                                       | Ca1p2 Eri:PD1A4_RAT      | 0,450911793  | 0,09381696 | 4,80629281 | 11  | 0,00054779 | 0,0017488  |
| Q9E573     | Protea some ma l ubiquitin receptor ADRMI (110 kDa cell membrane glycopro tein) (Gp II O) (Adhesio n-regu la ti ng molecule 1) (ARM-1) (Rpn13 homolog)                                                                                                                                                                                         | Adrm1 Gp1CADRMI_RAT      | 0,34204678   | 0,0848745  | 4,03002988 | 22  | 0,00056056 | 0,00178564 |
| POS765     | Transtin-associated protein X (Transtlin -asso ciated factor X)                                                                                                                                                                                                                                                                                | TsnaX Trax TSNAX_RAT     | 0,271834358  | 0,07824846 | 3,47398999 | 408 | 0,0005677  | 0,00180437 |
| P09606     | ATP-binding cassette sub-family 8 member 6, mitochondrial (Ubiquitously-expressed mammalian ABC half transporter)                                                                                                                                                                                                                              | Abcb6 Umat ABCB6_RAT     | 1,02595344   | 0,06638229 | 15,4552275 |     | 0,00058849 | 0,00186635 |
| P18614     | Coiled-coil domain -containing prote in 43                                                                                                                                                                                                                                                                                                     | Ccdc43 CCD43_RAT         | -0,704341374 | 0,19311678 | -3,6472303 | 55  | 0,00058986 | 0,0018666  |
| Q9JHWO     | Mitogen-activated protein kinase 1 (MAP kinase 1) (MAPK 1) (EC 2.7.11.24) (ERT1) (Extrace llul ar signa l- regu lated kinase 2) (ERK-2) (MAP kinase isoform p42) (p42-MAPK) (Mitogen-activated protein kinase 2) (MAPKase 2) (MAPK2)                                                                                                           | I Erk2 Mapk1 MKO1_RAT    | -0,644469112 | 0,13967799 | -4,6139634 | 12  | 0,00059637 | 0,00188308 |
| CON_007078 | DNA-(apur in ic or apyrimidin ic site) lyase (EC 3.1.-.-) (EC 4.2.99.18) (APEX nuclease) (APEN) (Apurinic -apyrimi din ic endonuclease 1) (AP endonuclease 1) (REF-1) (Re dox factor-I) (Cle ave for: ONA-(apurinic or xl apyrimidin ic site) lyase, mitochondrial)                                                                            | I Ape Apex APEX1_RAT     | -0,59362696  | 0,16772582 | -5,3392858 | 93  | 0,00062857 | 0,0019804  |
| P62083     | UDP- N-acetylglucosamine- N-acetylglucosaminidyl transferase 110 kDa s ubun it (EC 2.4.1.255) (O-G l c NAc transferase subun it p10) (O-linked N-acetylglucosamine transferase 110 kDa s ubun it) (OG T) (Gua nine nucleot ide-bind ing protein G) (I)G(S)/G(T) subun it beta-2 (G protein subunit beta-2) (Trans ducin beta chain 2)          | Ogt OGT1_RAT             | -0,296573435 | 0,08167079 | -3,6313279 | 52  | 0,00064474 | 0,00202252 |
| P38659     | Ne urofi la ment hea vy polypeptide (NF-H) (200 kDa neurofilament protein) (Neurofilament triple t H protein)                                                                                                                                                                                                                                  | Gnb2 GBB2_RAT            | 0,624438678  | 0,17325592 | 3,60414053 | 59  | 0,0006445  | 0,00202252 |
| Q9JMB5     | Oihydrolypolylysine-residue acetyltransferase component of pyruvate dehydrogenase complex, mitochondrial (EC 2.3.1.12) (70 kDa mitochondrial autoantigen of primary biliary cirrhosis) (PBC) (Dihydroipoamide acetyltransfe rase comp onent of pyruvate dehydrogenase complex) (Pyruvate dehydrogenase comp lex component E2) (PDC-E2) (PDCE2) | Nefh Nfh NFH_RAT         | -1,2761881   | 0,334135   | -3,8193787 | 29  | 0,00065183 | 0,00204032 |
| Q9JHB5     | ATP-binding cassette sub-family A member 2 (ATP-bin ding cassette transporter 2) (ATP-bin din g c cassette 2)                                                                                                                                                                                                                                  | Dlat ODP2_RAT            | 0,521777165  | 0,09681695 | 5,3893164  |     | 0,00065431 | 0,00204366 |
| 070595     | Aromatic-L-amino-acid decarboxy lase (AADC) (EC 4.1.1.28) (DOPA decarboxy lase) (DOC)                                                                                                                                                                                                                                                          | Ddc DDC_RAT              | -0,15661359  | 0,04555418 | -3,437963  | 275 | 0,00067688 | 0,00210502 |
| P63086     | NADH dehydrogenase [ub iqu inone ] flavoprotein 3, mitochondria l (Complex 1-9kD) (CI-9k D) (NDH- H- ub iqu inone ox idore ductase 9 kDa subun it)                                                                                                                                                                                             | Ndufv3 NDUV3_RAT         | 0,361993717  | 0,0715759  | 5,05748072 |     | 0,00068337 | 0,00212066 |
| P43138     |                                                                                                                                                                                                                                                                                                                                                |                          |              |            |            |     |            |            |

|                                                                                                                                                                                                                                                                        |                                                                                                                                                                                                                                                                                                                                             |                         |              |            |            |     |            |            |
|------------------------------------------------------------------------------------------------------------------------------------------------------------------------------------------------------------------------------------------------------------------------|---------------------------------------------------------------------------------------------------------------------------------------------------------------------------------------------------------------------------------------------------------------------------------------------------------------------------------------------|-------------------------|--------------|------------|------------|-----|------------|------------|
|                                                                                                                                                                                                                                                                        | V-type proton ATPase subunit B, brain isoform (V-ATPase subunit B 2) (Endomembrane proton pump 58 kDa subunit) (Vacuolar proton pump vlb2 Atp6b2 VATB2_RAT subunit B 2)                                                                                                                                                                     |                         | -0,714169018 | 0,20022563 | -3,5668211 | 63  | 0,00069678 | 0,00215299 |
| P56558                                                                                                                                                                                                                                                                 | Staphylococcal nuclease domain-containing protein 1 {100 kDa coactivator} (SND p102) (p100 co-activator) (p105 coactivator)                                                                                                                                                                                                                 | Snd1 SND1_RAT           | -0,257263957 | 0,04472161 | -5,7525646 |     | 0,00069658 | 0,00215299 |
| P54313;P543                                                                                                                                                                                                                                                            | Lysosome-associated membrane glycoprotein 1 (LAMP-1) (Lysosome-associated membrane protein 1) (120 kDa lysosomal membrane glycoprotein) (LGP-120) (CD107 antigen-like family member A) (CD antigen CD107a)                                                                                                                                  | amp1 Lamp-1: LAMPL_RAT  | 0,467689556  | 0,1362678  | 3,43213557 | 251 | 0,00070021 | 0,00215566 |
| P16884                                                                                                                                                                                                                                                                 | AP-2 complex subunit sigma (Adaptor protein complex AP-2 subunit sigma) (Adaptor-related protein complex 2 subunit sigma) (Clathrin assembly protein 2 sigma small chain) (Clathrin coat assembly protein AP17) (Clathrin coat-associated protein AP17) (Plasma membrane adaptor AP-2 17 kDa protein) (Sigma-adaptin 3b) (Sigma2-a adaptin) | 2sl Ap17 Clat AP2SI_RAT | -0,243565771 | 0,07098713 | -3,4311257 | 256 | 0,00070063 | 0,00215566 |
| P08461                                                                                                                                                                                                                                                                 | Ezrin (Cyto villin) (Villin-2) (p81)                                                                                                                                                                                                                                                                                                        | Ezr Vil2 EZRI_RAT       | 0,23017517   | 0,04069052 | 5,65672747 |     | 0,00076908 | 0,00236125 |
| O9ESR9                                                                                                                                                                                                                                                                 | Cellular retinoic acid-binding protein 1 (Cellular retinoic acid-binding protein 1) (CRABP-1)                                                                                                                                                                                                                                               | Crabp1 RABP1_RAT        | 0,198469455  | 0,0556555  | 3,56603462 | 48  | 0,00083302 | 0,00255211 |
| P14173                                                                                                                                                                                                                                                                 | Sentrin-specific protease 8 (EC 3.4.22.68) (Densin-1) (NEDD8-specific protease 1) (Sentrin/SUMO-specific protease SENP8)                                                                                                                                                                                                                    | Senp8 SENP8_RAT         | 0,528204269  | 0,10194714 | 5,18115815 |     | 0,00084156 | 0,00257282 |
| O6PCU8                                                                                                                                                                                                                                                                 | Alpha-mannosidase 2C1 (EC 3.2.1.24) (Alpha-D-mannoside mannohydrolase) (Mannosidase alpha class 2C member 1)                                                                                                                                                                                                                                | Man2c1 MA2C1_RAT        | -0,257445311 | 0,07690384 | -3,3476264 | 639 | 0,00086291 | 0,00263251 |
| P62815                                                                                                                                                                                                                                                                 | Connector enhancer of kinase suppressor of ras 2 (Connector enhancer of KSR 2) (CNK homolog protein 2) (CNK2) (Membrane-associated guanylate kinase-interacting protein) (MAGUK)                                                                                                                                                            | Cnksr2 CNKR2_RAT        | 0,292809089  | 0,08648209 | 3,38577738 | 148 | 0,00090906 | 0,00276116 |
| O66X93                                                                                                                                                                                                                                                                 | Unconventional myosin-1d (Myosin heavy chain myr4)                                                                                                                                                                                                                                                                                          | Myold Myr4MYO1D_RAT     | 0,412950659  | 0,11626342 | 3,5518536  | 45  | 0,00091082 | 0,00276116 |
| P14562                                                                                                                                                                                                                                                                 | Liprin-alpha-3 (Protein tyrosine phosphatase receptor type f polypeptide-interacting protein alpha-3) (PTPRF-interacting protein alpha-3)                                                                                                                                                                                                   | Ppfia3 LIPA3_RAT        | -0,340247231 | 0,09909625 | -3,4335026 | 88  | 0,00091044 | 0,00276116 |
| P62744                                                                                                                                                                                                                                                                 | Major prion protein (PrP) (CD antigen CD230)                                                                                                                                                                                                                                                                                                | Prnp Prn Prp PRIO_RAT   | -1,036471968 | 0,20289258 | -5,1084765 |     | 0,00092017 | 0,00278366 |
| P31977                                                                                                                                                                                                                                                                 | Guanine deaminase (Guanase) (Guanine aminase) (EC 3.5.4.3) (Guanine aminohydrolase) (GAH)                                                                                                                                                                                                                                                   | Gda GUAD_RAT            | 0,302340831  | 0,08621172 | 3,50695743 | 53  | 0,00093197 | 0,00281347 |
| P62966                                                                                                                                                                                                                                                                 | Aspartate aminotransferase, cytoplasmic (cAspAT) (EC 2.6.1.1) (EC 2.6.1.3) (Cysteine aminotransferase, cytoplasmic) (Cysteine transaminase, cytoplasmic) (cCAT) (Glutamate oxaloacetate transaminase 1) (Transaminase A)                                                                                                                    | Got1 AATC_RAT           | 1,390040283  | 0,15900381 | 8,74218211 |     | 0,00094342 | 0,00284209 |
| O5FVJ8                                                                                                                                                                                                                                                                 | Fructose-bisphosphate aldolase C (EC 4.1.2.13) (Brain-type aldolase)                                                                                                                                                                                                                                                                        | Aldoc ALDOC_RAT         | -2,542069295 | 0,46688745 | -5,4447154 |     | 0,0009614  | 0,0028902  |
| P21139                                                                                                                                                                                                                                                                 | cAMP-dependent protein kinase catalytic subunit beta (PKA C-beta) (EC 2.7.11.11)                                                                                                                                                                                                                                                            | Prkacb Kpacb KAPCB_RAT  | -0,715487793 | 0,08283431 | -8,6375773 |     | 0,00098796 | 0,00296388 |
| O921T4                                                                                                                                                                                                                                                                 | Stromal interaction molecule 1                                                                                                                                                                                                                                                                                                              | Stim1Sim STIM1_RAT      | -0,253052225 | 0,05286291 | -4,7869518 |     | 0,00099916 | 0,00296864 |
| 063357                                                                                                                                                                                                                                                                 | Leucine-rich glioma-inactivated protein 1                                                                                                                                                                                                                                                                                                   | Lgil LGIL_RAT           | 0,392945554  | 0,09642488 | 4,07514696 | 15  | 0,00099518 | 0,00297317 |
| 091279                                                                                                                                                                                                                                                                 | Kynurenine-oxoglutarate transaminase 3 (EC 2.6.1.7) (Cysteine-S-conjugate beta-lyase 2) (EC 4.4.1.13) (Kynurenine aminotransferase III) (KATIII) (Kynurenine-glyoxylate transaminase) (EC 2.6.1.63) (Kynurenine-oxoglutarate transaminase III)                                                                                              | Ceb12 Kat3 KAT3_RAT     | 0,323563242  | 0,07976359 | 4,05622792 | 15  | 0,00103351 | 0,0030813  |
| P13852                                                                                                                                                                                                                                                                 | Myelin-oligodendrocyte glycoprotein                                                                                                                                                                                                                                                                                                         | Mog MOG_RAT             | -0,255178328 | 0,07590162 | -3,3619615 | 119 | 0,00104121 | 0,00309786 |
| O9WTT6                                                                                                                                                                                                                                                                 | FAS-associated factor 2 (UBX domain-containing protein 8)                                                                                                                                                                                                                                                                                   | Faf1 Ubxd8 FAF2_RAT     | -0,312725244 | 0,09505433 | -3,2899633 | 596 | 0,00106112 | 0,0031506  |
| P13221                                                                                                                                                                                                                                                                 | Ubiquitin carboxyl-terminal hydrolase 19 (EC 3.4.19.12) (Deubiquitinating enzyme 19) (Ubiquitin thioesterase 19) (Ubiquitin-specific-processing protease 19)                                                                                                                                                                                | Usp19 UBP19_RAT         | 0,326009759  | 0,09915815 | 3,28777586 | 588 | 0,00107007 | 0,00316914 |
| P09117                                                                                                                                                                                                                                                                 | Charged multivesicular body protein 5 (Chromatin-modifying protein 5)                                                                                                                                                                                                                                                                       | Chmp5 CHMP5_RAT         | -0,634889225 | 0,17888316 | -3,5491839 | 37  | 0,00107175 | 0,00316914 |
| P68182                                                                                                                                                                                                                                                                 | UBX domain-containing protein 4 (Erasin) (UBX domain-containing protein 2)                                                                                                                                                                                                                                                                  | n4 Ubxd2 Ub, UBXN4_RAT  | 0,503842397  | 0,10735309 | 4,69331997 |     | 0,00113076 | 0,00333679 |
| P84903                                                                                                                                                                                                                                                                 | Cysteine sulfinic acid decarboxylase (EC 4.1.1.29) (Cysteine-sulfinylate decarboxylase) (Sulfinolalanine decarboxylase)                                                                                                                                                                                                                     | Csad Csd CSAD_RAT       | 0,488035881  | 0,1396826  | 3,49389185 | 42  | 0,00113577 | 0,00334472 |
| O8K4Y5                                                                                                                                                                                                                                                                 | Cullin-3                                                                                                                                                                                                                                                                                                                                    | Cul3 CUL3_RAT           | 0,062964584  | 0,01087678 | 5,78889787 |     | 0,00116298 | 0,00341787 |
| O58FK9                                                                                                                                                                                                                                                                 | Acyl-protein thioesterase 2 (APT-2) (EC 3.1.2.-) (Lysophospholipase 2) (Lysophospholipase II) (LPL-II) (LysopLA II)                                                                                                                                                                                                                         | Lyp2a2 LYPA2_RAT        | 0,280782839  | 0,08295687 | 3,38468461 | 66  | 0,00120343 | 0,00352957 |
| 063345                                                                                                                                                                                                                                                                 | Pre-B-cell leukemia transcription factor-interacting protein 1 (Hematopoietic PBX-interacting protein)                                                                                                                                                                                                                                      | Pbxip1 Hpip PBIP1_RAT   | -1,235425823 | 0,28681225 | -4,3074374 | 11  | 0,00124044 | 0,00363073 |
| O5BK32                                                                                                                                                                                                                                                                 | Vacuolar protein sorting-associated protein 45 (rVps45)                                                                                                                                                                                                                                                                                     | Vps45 Vps45a VPS45_RAT  | 0,873794493  | 0,13360435 | 6,54016522 |     | 0,00125111 | 0,00365456 |
| O6J1Y9                                                                                                                                                                                                                                                                 | Hepatoma-derived growth factor (HDGF)                                                                                                                                                                                                                                                                                                       | Hdgf HDGF_RAT           | 0,361630034  | 0,10662311 | 3,39166647 | 57  | 0,00126814 | 0,00369683 |
| Q4QQV8                                                                                                                                                                                                                                                                 | Microtubule-associated protein P/EBF family member 3 (EB1 protein family member 3) (EBF3) (End-binding protein 3) (EB3) (RP3)                                                                                                                                                                                                               | Maprc3 MARE3_RAT        | 0,42860525   | 0,06576056 | 6,51766457 |     | 0,00127088 | 0,00369733 |
| O5HZV0                                                                                                                                                                                                                                                                 | Phosphoglycerate mutase 2 (EC 3.1.3.13) (EC 5.4.2.11) (EC 5.4.2.4) (BPG-dependent PGAM 2) (Muscle-specific phosphoglycerate mutase)                                                                                                                                                                                                         | Pgam2 PGAM2_RAT         | -0,301926838 | 0,08684321 | -3,4766891 | 37  | 0,00131436 | 0,00381614 |
| 064611                                                                                                                                                                                                                                                                 | {Phosphoglycerate mutase isozyme M} (PGAM-M)                                                                                                                                                                                                                                                                                                |                         |              |            |            |     |            |            |
| B5DF89                                                                                                                                                                                                                                                                 | ADP-ribosylation factor 4                                                                                                                                                                                                                                                                                                                   | Arf4 ARF4_RAT           | -0,338365799 | 0,1042116  | -3,246911  | 158 | 0,0014247  | 0,0041282  |
| O90YL8                                                                                                                                                                                                                                                                 | Contactin-1 (Neural cell surface protein F3)                                                                                                                                                                                                                                                                                                | Cntn1 CNTN1_RAT         | 0,839179886  | 0,23831773 | 3,52126496 | 29  | 0,00144151 | 0,00416853 |
| A2VD12                                                                                                                                                                                                                                                                 | Prohibitin-2 (B-cell receptor-associated protein BAP37) (BAP-37)                                                                                                                                                                                                                                                                            | Phb2 Bcap37 PHB2_RAT    | -0,911149205 | 0,25711821 | -3,5436977 | 27  | 0,00145963 | 0,0042054  |
| 008700                                                                                                                                                                                                                                                                 | Calumenin (CBP-50) (Crocalbin)                                                                                                                                                                                                                                                                                                              | Calu CALU_RAT           | -0,320304399 | 0,09313601 | -3,4391036 | 37  | 0,00146009 | 0,0042054  |
| O8VHK7                                                                                                                                                                                                                                                                 | Mitochondrial import receptor subunit TOM22 homolog (rTOM22) (Translocase of outer membrane 22 kDa subunit homolog)                                                                                                                                                                                                                         | Jmm22 Tom2TOM22_RAT     | 0,380726367  | 0,10598672 | 3,59220833 | 24  | 0,00146573 | 0,00421325 |
| O5XIT1                                                                                                                                                                                                                                                                 | Tubulin beta-3 chain (Neuron-specific class III beta-tubulin)                                                                                                                                                                                                                                                                               | Tubb3 TBB3_RAT          | 0,20070516   | 0,06160822 | 3,25776591 | 113 | 0,00148321 | 0,00425102 |
| P16290                                                                                                                                                                                                                                                                 | Hematological and neurological expressed 1 protein [Cleaved into: Hematological and neurological expressed 1 protein, N-terminally processed]                                                                                                                                                                                               | Hal HNL_RAT             | 1,185575088  | 0,15274012 | 7,76204129 |     | 0,00148476 | 0,00425102 |
| P61751                                                                                                                                                                                                                                                                 | ADP-ribosylation factor-like protein 8B                                                                                                                                                                                                                                                                                                     | Arl8b ARL8B_RAT         | 0,474271532  | 0,10573675 | 4,48539916 |     | 0,00152055 | 0,00434487 |
| 063198                                                                                                                                                                                                                                                                 | Vesicular glutamate transporter 2 (VGLUT2) (Differentiation-associated BNPI) (Differentiation-associated Na(+)-dependent inorganic phosphate 17a Dnpi Vgl VGLU2_RAT cotransporter) (Solute carrier family 17 member 6)                                                                                                                      | 17a6 Dnpi Vgl VGLU2_RAT | 0,194266458  | 0,06088686 | 3,19061368 | 401 | 0,0015314  | 0,00436722 |
| O5XIH7                                                                                                                                                                                                                                                                 | Aminoacylase-1A (ACY-1A) (EC 3.5.1.14) (ACY-1A) (N-acyl-L-amino acid amidohydrolase)                                                                                                                                                                                                                                                        | Acyla Acyl ACY1A_RAT    | 0,619477587  | 0,18162383 | 3,41077257 | 38  | 0,00154912 | 0,00440904 |
| 035783                                                                                                                                                                                                                                                                 | Galectin-3 (Gal-3) (35 kDa lectin) (Carbohydrate-binding protein 35) (CBP35) (Galactose-specific lectin 3) (IgE-binding protein) (Laminin-binding protein) (Lectin L-29) (Mac-2 antigen)                                                                                                                                                    | Lgals3 LEG3_RAT         | -1,39606218  | 0,22411848 | -6,2291256 |     | 0,00156009 | 0,00442281 |
| O75041                                                                                                                                                                                                                                                                 | Osteoclast-stimulating factor 1                                                                                                                                                                                                                                                                                                             | Ostf1 OSTF1_RAT         | 0,49906346   | 0,09126045 | 5,46856218 |     | 0,00156001 | 0,00442281 |
| O4ORB4                                                                                                                                                                                                                                                                 | Histone H1.4 (H1d)                                                                                                                                                                                                                                                                                                                          | -listh1e H1fL H14_RAT   | -0,477692013 | 0,14918828 | -3,2019407 | 214 | 0,00157296 | 0,00445056 |
| O6AXU6                                                                                                                                                                                                                                                                 | D-dopachrome decarboxylase (EC 4.1.1.84) (D-dopachrome tautomerase)                                                                                                                                                                                                                                                                         | Ddt DOPD_RAT            | 0,358917288  | 0,08842522 | 4,05899232 | 12  | 0,00158457 | 0,00447462 |
| O66HA6                                                                                                                                                                                                                                                                 | COP9 signalosome complex subunit 4 (SGN4) (Signalosome subunit 4) (JAB1-containing signalosome subunit 4)                                                                                                                                                                                                                                   | Cops4 Csn4 CSN4_RAT     | 0,431176458  | 0,12426841 | 3,46971906 | 30  | 0,00160027 | 0,00451013 |
| Peptidyl-prolyl-cis-trans isomerase FKBP4 (PPIase FKBP4) (EC 5.2.1.8) (52 kDa FK506-binding protein) (52 kDa FKBP) (FKBP-52) (59 kDa immunophilin) (p59) (FK506-binding protein 4) (FKBP-4) (FKBP59) (HSP-binding immunophilin) (HBI) (Immunophilin FKBP52) (Rotamase) | Fkbp4 Fkbp52 FKBP4_RAT                                                                                                                                                                                                                                                                                                                      |                         | -0,571250419 | 0,16925811 | -3,3750254 | 41  | 0,00162413 | 0,00456846 |
| O9J112                                                                                                                                                                                                                                                                 | [Cleaved into: Peptidyl-prolyl-cis-trans isomerase FKBP4, N-terminally processed]                                                                                                                                                                                                                                                           |                         |              |            |            |     |            |            |
| O6AY87                                                                                                                                                                                                                                                                 | ATP synthase F(0) complex subunit B1, mitochondrial (ATP synthase subunit b) (ATPase subunit b)                                                                                                                                                                                                                                             | Atp5f1 Atp5f AT5F1_RAT  | -0,167986019 | 0,05176208 | -3,2453492 | 92  | 0,00163648 | 0,00459424 |
| P08699                                                                                                                                                                                                                                                                 | Paraspeckle component 1                                                                                                                                                                                                                                                                                                                     | Pspcl1 PSPCL1_RAT       | -0,345041955 | 0,10506841 | -3,2839742 | 63  | 0,00167338 | 0,00467962 |
| O6P686                                                                                                                                                                                                                                                                 | Cytosolic acyl coenzyme A thioester hydrolase (EC 3.1.2.2) (ACH1) (ACT) (Acyl-CoA thioesterase 7) (Brain acyl-CoA hydrolase) (BACH) (CTE-IIa) (CTE-IIb) (CTE-11) (LAC-H1) (Long chain acyl-CoA thioester hydrolase) (MTE-II)                                                                                                                | Acot7 Bach BACH_RAT     | -0,785674967 | 0,23718796 | -3,3124572 | 53  | 0,00167059 | 0,00467962 |
| P15865                                                                                                                                                                                                                                                                 | Ig kappa chain C region, B allele                                                                                                                                                                                                                                                                                                           | KACB_RAT                | 0,36198605   | 0,09001805 | 4,02126084 | 12  | 0,00169561 | 0,00473263 |

|          |                                                                                                                                                                                                                                                                                                                                                                                 |          |                   |              |            |            |     |            |            |
|----------|---------------------------------------------------------------------------------------------------------------------------------------------------------------------------------------------------------------------------------------------------------------------------------------------------------------------------------------------------------------------------------|----------|-------------------|--------------|------------|------------|-----|------------|------------|
|          | Ectonucleotide pyrophosphatase / phosphodiesterase family member 6 (E-NPP6) (NPP-6) (EC 3.1.4.-) (EC 3.1.4.38) (Choline-specific glycerophosphodiester phosphodiesterase) (Glycerophosphocholine cholinephosphodiesterase) [GPC-Cpde]                                                                                                                                           | Enpp6    | ENPP6_RAT         | -0,212220911 | 0,08551932 | -3,1831209 | 111 | 0,0011212  | 0,00479411 |
| P80254   | Protein phosphatase 1A (EC 3.1.3.16) (Protein phosphatase 2C isoform alpha) (PP2C-alpha) (Protein phosphatase 1A)                                                                                                                                                                                                                                                               | laPp2c1  | PPM1A_RAT         | -0,287202696 | 0,09050577 | -3,1733082 | 216 | 0,00172668 | 0,00480077 |
| Q68FS2   | Fetuin-B {Fetuin-like protein IRL685}                                                                                                                                                                                                                                                                                                                                           | Fetub    | FETUB_RAT         | 0,520907753  | 0,13703896 | 3,80116532 | 15  | 0,00173908 | 0,00482595 |
| Q9QVC8   | Microtubule-associated protein RP/EB family member 2                                                                                                                                                                                                                                                                                                                            | Mapre2   | MARE2_RAT         | 0,513249643  | 0,16044484 | 3,19891639 | 117 | 0,00177526 | 0,00490746 |
| P19511   | Cytochrome c, somatic                                                                                                                                                                                                                                                                                                                                                           | Cytc     | CYC_RAT           | 0,349567463  | 0,10470701 | 3,33852985 | 42  | 0,00177302 | 0,00490746 |
| Q4KLH4   | Ke1b-like protein 22                                                                                                                                                                                                                                                                                                                                                            | Klhl22   | KLH22_RAT         | -0,825413318 | 0,13733004 | -6,0104351 |     | 0,00183184 | 0,00504454 |
| Q64559-1 | 60S ribosomal protein L3 {L4}                                                                                                                                                                                                                                                                                                                                                   | Rpl3     | RL3_RAT           | 0,343085678  | 0,08623497 | 3,97849828 | 12  | 0,00183124 | 0,00504454 |
|          | tRNA <sup>tyr</sup> synthetase 4 (tRNA <sup>tyr</sup> -synthesizing protein 4) (EC 2.1.1.290) (EC 2.3.1.231) (Leucine carboxyl methyltransferase 2)                                                                                                                                                                                                                             |          |                   |              |            |            |     |            |            |
|          | (tRNA(Phe) (7-(3-amino-3-(methoxycarbonyl)propyl)lysine(37)-N)-methoxycarbonyltransferase) (tRNA(Phe) (7-(3-amino-3-carboxypropyl)lysine(37)-0)-methyltransferase)                                                                                                                                                                                                              | Lem2     | Tyw4 TYW4_RAT     | 0,31373735   | 0,08433398 | 3,72017708 | 16  | 0,00186135 | 0,00511604 |
| P01835   | Vitamin D-binding protein (DBP) (VDB) (G-globulin) (Group-specific component)                                                                                                                                                                                                                                                                                                   | GeDbp    | VTDB_RAT          | -0,482398182 | 0,15224426 | -3,1685805 | 136 | 0,00189221 | 0,00518898 |
| BOBND0   | Serine/threonine-protein kinase 24 (EC 2.7.11.1) (Mammalian STE20-like protein kinase 3) (MST-3) (MST3b) (STE20-like kinase MST3) [Cleaved into: Serine/threonine-protein kinase 24 35 kDa subunit (Mammalian STE20-like protein kinase 3 N-terminal) (MST3/N); Serine/threonine-protein kinase 24 12 kDa subunit (Mammalian STE20-like protein kinase 3 (-terminal) (MST3/C))] | 24Mst3   | Stk24_RAT         | 0,391147042  | 0,12320435 | 3,17478262 | 123 | 0,00189507 | 0,00518898 |
| P20650   | Alpha-actinin-1 (Alpha-actinin cytoskeletal isoform) (F-actin cross-linking protein) (Non-muscle alpha-actinin-1)                                                                                                                                                                                                                                                               | Actn1    | ACTN1_RAT         | 0,622118988  | 0,13709132 | 4,5379895  |     | 0,00190423 | 0,00520416 |
| Q9QX79   | Heterochromatin protein 1-binding protein 3                                                                                                                                                                                                                                                                                                                                     | Hplbp3   | HPIB3_RAT         | 0,309871937  | 0,0957872  | 3,23500358 | 62  | 0,00195251 | 0,00532604 |
| Q3B8Q0   | 40S ribosomal protein SA (37 kDa laminin receptor precursor) (37 LR P) (37/67 kDa laminin receptor) (LRP/LR) (67 kDa laminin receptor) (67 LR) {Laminin receptor 1} (LamR) (Laminin-binding protein precursor p40)                                                                                                                                                              | Rpsa     | Lamr1 RSSA_RAT    | -0,547818285 | 0,17315517 | -3,163742  | 119 | 0,00197729 | 0,00538344 |
| P62898   | (LBP/p40)<br>Estradiol 17-beta-dehydrogenase 12 (EC 1.1.1.62) (17-beta-hydroxysteroid dehydrogenase 12) (17-beta-HSD 12) (3-ketoacyl-CoA reductase) (KAR) (EC 1.3.1.-)                                                                                                                                                                                                          | Hsd17b12 | DHB12_RAT         | 0,473197878  | 0,11043905 | 4,28469722 |     | 0,00203586 | 0,00552208 |
| 03ZC3    | 40S ribosomal protein 511                                                                                                                                                                                                                                                                                                                                                       | Rps11    | RS11_RAT          | -0,768026021 | 0,23135488 | -3,319688  | 37  | 0,00203299 | 0,00552208 |
| P21531   | Obg-like ATPase 1                                                                                                                                                                                                                                                                                                                                                               | Dial     | OLAI_RAT          | 0,691438825  | 0,20459287 | 3,37958414 | 28  | 0,00215286 | 0,00581755 |
| Q5XIA3   | Complexin-1 (Complexin I) (CPX I) (Synaphin-2)                                                                                                                                                                                                                                                                                                                                  | Cplx1    | CPLX1_RAT         | 0,630390437  | 0,13348518 | 4,72255002 |     | 0,00215114 | 0,00581755 |
| P04276   | Mannose-6-phosphate isomerase (EC 5.3.1.8) (Phosphohexomutase) {Phosphomannose isomerase} (PM I)                                                                                                                                                                                                                                                                                | Mpi      | MPI_RAT           | -0,549044964 | 0,15933814 | -3,4457849 | 23  | 0,0022     | 0,00593384 |
| BOLT89   | Catenin beta-1 (Beta-catenin)                                                                                                                                                                                                                                                                                                                                                   | Ctnnb1   | Catnb CTNBL_RAT   | 0,517274817  | 0,14860535 | 3,48086259 | 21  | 0,00223075 | 0,00600555 |
| Q9Z1P2   | WO repeat-containing protein 1                                                                                                                                                                                                                                                                                                                                                  | Wdr1     | WDRI_RAT          | 1,20233396   | 0,32687791 | 3,67823561 | 15  | 0,00223662 | 0,00601012 |
| Q6P747   | 60S acidic ribosomal protein P1                                                                                                                                                                                                                                                                                                                                                 | Rplp1    | RLAI_RAT          | 0,138931105  | 0,04413872 | 3,1476018  | 85  | 0,00227059 | 0,00609007 |
| P38983   | Dynein light chain 2, cytoplasmic {Dynein light chain LC8-type 2}                                                                                                                                                                                                                                                                                                               | Dynl2    | Dlc2 DYLL2_RAT    | -0,543470245 | 0,07850245 | -6,9229715 |     | 0,00228488 | 0,00611703 |
| Q6P7R8   | Latexin (Endogenous carboxypeptidase inhibitor) (EC1) (Tissue carboxypeptidase inhibitor) (TCI)                                                                                                                                                                                                                                                                                 | Utn      | LXN_RAT           | 0,242250842  | 0,07534517 | 3,21521394 | 49  | 0,00230908 | 0,00617038 |
| P62282   | Protein quaking {Rqkl}                                                                                                                                                                                                                                                                                                                                                          | QkiQk    | QKI_RAT           | -0,365974488 | 0,11895822 | -3,0764961 | 214 | 0,0023679  | 0,00631586 |
| AOJP37   |                                                                                                                                                                                                                                                                                                                                                                                 |          |                   |              |            |            |     |            |            |
|          | Neurexin-1 (Neuron-derived neurotrophic factor) (SCIR P10-related protein) (Spinal cord injury-related protein 10)                                                                                                                                                                                                                                                              | Neuf     | Scirp10 NENF_RAT  | 0,470910538  | 0,15325757 | 3,07267394 | 208 | 0,00240534 | 0,0064039  |
| P63041   | Membrane-associated progesterone receptor component 1 (25-DX)                                                                                                                                                                                                                                                                                                                   | 125dx    | Lewi1 PGRC1_RAT   | -0,578990911 | 0,16905557 | -3,4248556 | 22  | 0,00242312 | 0,00643935 |
| Q68FX1   | (Acidic 25 kDa protein) {Ventral midline antigen} (VEMA)                                                                                                                                                                                                                                                                                                                        | Add2     | ADDB_RAT          | 1,597452175  | 0,2833222  | 5,63828799 |     | 0,00243394 | 0,0064562  |
| Q9WU82   | Beta-adducin {Adducin-63} (Erythrocyte adducin subunit beta)                                                                                                                                                                                                                                                                                                                    | Syng1    | SNGL_RAT          | -0,228023057 | 0,07516144 | -3,0337772 | 496 | 0,00254177 | 0,00671973 |
| Q5RKIO   | Synaptagyrin-1 (p29)                                                                                                                                                                                                                                                                                                                                                            | Oabl     | Hsp84 f HS90B_RAT | -0,546927439 | 0,16821277 | -3,2514026 | 35  | 0,0025426  | 0,00671973 |
| P19944   | Heat shock protein HSP 90-beta (Heat shock 84 kDa) (HSP84) (HSP84)                                                                                                                                                                                                                                                                                                              | Capza1   | CAZAL_RAT         | 0,399964735  | 0,12685854 | 3,15284046 | 58  | 0,00256003 | 0,00675341 |
| Q78P75   | F-actin-capping protein subunit alpha-1 (CapZ alpha-1)                                                                                                                                                                                                                                                                                                                          | Rpl19    | RLI9_RAT          | -0,465165298 | 0,15087462 | -3,0831249 | 112 | 0,00257943 | 0,00679219 |
| Q64361   | 60S ribosomal protein L19                                                                                                                                                                                                                                                                                                                                                       | Nap1l4   | NP1L4_RAT         | -0,209108117 | 0,06666183 | -3,1368494 | 62  | 0,002612   | 0,00685986 |
| Q91XU1   | Nucleosome assembly protein 1-like 4                                                                                                                                                                                                                                                                                                                                            | Oped     | DPCD_RAT          | 0,331441686  | 0,09710089 | 3,41337446 | 21  | 0,00261464 | 0,00685986 |
| Q61UR5   |                                                                                                                                                                                                                                                                                                                                                                                 |          |                   |              |            |            |     |            |            |
|          | DnaJ homolog subfamily B member 6 (Heat shock protein J2) (HSJ-2) {Hsp40 homolog} {MRJ} {MSJ-1}                                                                                                                                                                                                                                                                                 | Dnajb6   | DNJB6_RAT         | -0,32650515  | 0,10322672 | -3,1629906 | 48  | 0,00270767 | 0,00709105 |
| P70580   |                                                                                                                                                                                                                                                                                                                                                                                 |          |                   |              |            |            |     |            |            |
|          | Protein lin-7 homolog C (Lin-7C) (Mammalian lin-seven protein 3) (MALS-3) (Vertebrate lin-7 homolog 3) (Veli-3)                                                                                                                                                                                                                                                                 | Lin7c    | LIN7C_RAT         | 0,648490647  | 0,11852583 | 5,47130233 |     | 0,00277811 | 0,00726234 |
| Q05764   | Stress-70 protein, mitochondrial (75 kDa glucose-regulated protein) (GRP-75) (Heat shock 70 kDa protein 9) (Mortalin) (Peptide-binding protein 74) {BP74} {mtHSP70}                                                                                                                                                                                                             | a9Grp75  | Hsp GRP75_RAT     | 0,312851086  | 0,09854453 | 3,1747179  | 42  | 0,00280714 | 0,00732496 |
| Q62876   | Nucleobindin-1 (Bone 63 kDa calcium-binding protein) {CALNUC}                                                                                                                                                                                                                                                                                                                   | Nucb1    | Nuc NUCB1_RAT     | -0,173457097 | 0,0578719  | -2,9972592 | 558 | 0,0028454  | 0,0074114  |
| P34058   | Uncharacterized protein C12orf43 homolog                                                                                                                                                                                                                                                                                                                                        |          | CL043_RAT         | -0,236488526 | 0,07740497 | -3,055211  | 101 | 0,00287668 | 0,00747937 |
| B2GUZ5   | Prostaglandin reductase 2 (PRG-2) (EC 1.3.1.48) (15-oxoprostaglandin 13-reductase) (Zinc-binding alcohol dehydrogenase domain-containing protein 1)                                                                                                                                                                                                                             | Ptgr2    | Zadhl PTGR2_RAT   | 0,694247739  | 0,21795193 | 3,185325   | 38  | 0,0028866  | 0,00749166 |
| P84100   | Secretogranin-3 {B1075} (Secretogranin III) (SgIII)                                                                                                                                                                                                                                                                                                                             | Seg3     | SCG3_RAT          | -0,337514874 | 0,11157602 | -3,0249768 | 152 | 0,00292032 | 0,00756558 |
| Q5U2Z3   | Trafficking protein particle complex subunit 3                                                                                                                                                                                                                                                                                                                                  | Trappc3  | TPPC3_RAT         | -0,623562733 | 0,17802776 | -3,5026152 | 16  | 0,00294722 | 0,00762158 |
| Q6AYM4   | Beta-2-microglobulin                                                                                                                                                                                                                                                                                                                                                            | B2m      | B2MG_RAT          | 0,973297826  | 0,27251969 | 3,57147711 | 14  | 0,0030673  | 0,0079179  |
| Q6AYU3   | Arginine-tRNA ligase, cytoplasmic (EC 6.1.1.19) (Arginyl-tRNA synthetase) {ARGRS}                                                                                                                                                                                                                                                                                               | Rars     | SYRC_RAT          | 0,529741307  | 0,14360617 | 3,68884781 | 12  | 0,00309829 | 0,00798363 |
| 079210   | 0-alpha-aminooxidase (DAO) (DAMOXY) (DAO) (EC 1.4.3.3)                                                                                                                                                                                                                                                                                                                          | Dao      | Daol OXDA_RAT     | 0,109592702  | 0,03694969 | 2,96599751 | 391 | 0,00320217 | 0,0082366  |
| P48721   | 60S ribosomal protein L5                                                                                                                                                                                                                                                                                                                                                        | Rpl5     | RLS_RAT           | 0,332305683  | 0,08054567 | 4,12568047 |     | 0,00331813 | 0,00851969 |
| Q63083   | Ubiquitin-like modifier-activating enzyme 5 (Ubiquitin-activating enzyme 5) (UFM1-activating enzyme) (Ubiquitin-activating enzyme E1 domain 1) {Jba5 Ubeldc: UBA5}_RAT                                                                                                                                                                                                          |          |                   | 0,237968718  | 0,06528294 | 3,64518973 | 12  | 0,003356   | 0,00860161 |
| Q51034   | Clusterin {Dimeric acid glycoprotein} (DAG) (Sulfated glycoprotein 2) (SGP-2) (Testosterone repressed prostate message 2) (TRPM-2) [Cleaved into: Clusterin beta chain; Clusterin alpha chain]                                                                                                                                                                                  | Cl       | CLUS_RAT          | 0,255219403  | 0,0742426  | 3,43764082 | 16  | 0,00338064 | 0,0086494  |
| Q5BK81   | GMP reductase 1 {EC 1.7.1.7} (Guanosine 5'-monophosphate oxidoreductase 1) (Guanosine monophosphate reductase 1)                                                                                                                                                                                                                                                                | Gmpr     | Gmpr1 GMPRI_RAT   | -1,654127491 | 0,48194562 | -3,432187  | 16  | 0,00341978 | 0,00873407 |
| P47868   | Vesicle-associated membrane protein 3 (VAMP-3) (Cellubrevin) (CEB) {Synaptobrevin-3}                                                                                                                                                                                                                                                                                            | Vamp3    | Syb3 VAMP3_RAT    | 0,197918302  | 0,06317588 | 3,13281418 | 36  | 0,00343311 | 0,00875262 |
| Q5UIZ2   | NADH dehydrogenase [ubiquinone] 1 alpha subcomplex subunit 11 {Complex I-B1.4.7} (CI-B14.7) (NADH-ubiquinone oxidoreductase subunit B14.7)                                                                                                                                                                                                                                      | Ndufa11  | NDUAB_RAT         | 0,285434484  | 0,08129136 | 3,5112524  | 14  | 0,00345704 | 0,00879807 |
| P07151   | Ubiquitin thioesterase OTUB1 (EC 3.4.19.12) (Deubiquitinating enzyme OTUB1) (OTU domain-containing ubiquitin aldehyde-binding protein 1) (Otubain-1) (Ubiquitin-specific-processing protease OTUB1)                                                                                                                                                                             | Otub1    | OTUB1_RAT         | -0,244419855 | 0,08224502 | -2,9718499 | 128 | 0,00353703 | 0,00898579 |
| P40329   | Myosin-3 {Myosin heavy chain 3} (Myosin in heavy chain, fast skeletal muscle, embryonic)                                                                                                                                                                                                                                                                                        | Myh3     | MYH3_RAT          | -0,486952054 | 0,14399891 | -3,3816372 | 17  | 0,00354591 | 0,00899252 |
| 035078   | Potassium voltage-gated channel subfamily A member 2 (RAK) (RBK2) {RCK5} (Voltage-gated potassium channel subunit Kv1.2)                                                                                                                                                                                                                                                        | Kcna2    | KCNA2_RAT         | -0,743456025 | 0,23317251 | -3,1884377 | 27  | 0,00360234 | 0,00911961 |
| P09895   | 40S ribosomal protein S4, X isoform                                                                                                                                                                                                                                                                                                                                             | Rps4x    | Rps4 RS4X_RAT     | -0,226915319 | 0,07452967 | -3,0446309 | 52  | 0,00365097 | 0,00922654 |
| Q5M7A4   | Hsp70-binding protein 1 (HspBP1) (Heat shock protein-binding protein 1) {Hsp70-interacting protein 1}                                                                                                                                                                                                                                                                           | spbp1    | Hspb1 HPBP1_RAT   | 0,492852051  | 0,16528598 | 2,98181405 | 87  | 0,00371621 | 0,00937499 |
| P05371   |                                                                                                                                                                                                                                                                                                                                                                                 |          |                   |              |            |            |     |            |            |
|          | Prelamin A/C [Cleaved into: Lamin A/C]                                                                                                                                                                                                                                                                                                                                          | Lmna     | Lmnl LMNA_RAT     | -0,65703855  | 0,22205575 | -2,95889   | 119 | 0,00372602 | 0,00937973 |
| Q9Z244   |                                                                                                                                                                                                                                                                                                                                                                                 | Asah1    | ASAH1_RAT         | 0,174704644  | 0,05811774 | 3,00604669 | 65  | 0,00375877 | 0,00943288 |
|          |                                                                                                                                                                                                                                                                                                                                                                                 | Tf       | TRFE_RAT          | -0,284558035 | 0,09738602 | -2,9219599 | 259 | 0,00378541 | 0,00948324 |

|        |                                                                                                                                      |                        |            |                       |                       |
|--------|--------------------------------------------------------------------------------------------------------------------------------------|------------------------|------------|-----------------------|-----------------------|
| P63025 | Trans form ing protein RhoA                                                                                                          | 10a Arha Arh; RHQA_RAT | 0,27540142 | 0,06459726 4,26336078 | 0,00373109 0,00937973 |
| Q80W89 | Acid cceramidase {AC} (ACDase) (Ac id CDase) (EC 3.5.1.23)<br>(Acylsphingosine deacylase) (N-acylsphingosine amidohydrolase)         |                        |            |                       |                       |
| B2RYG6 | Serotransferrin (Transferrin) (Be t a-1 meta l- bi nd i ng globulin) (Liver<br>regeneration -related protein LRRG03) (Sideroph ilin) |                        |            |                       |                       |

|            |                                                                                                                                                                                                                                                                                                                                                                                                  |         |            |              |            |            |            |                       |
|------------|--------------------------------------------------------------------------------------------------------------------------------------------------------------------------------------------------------------------------------------------------------------------------------------------------------------------------------------------------------------------------------------------------|---------|------------|--------------|------------|------------|------------|-----------------------|
| P12847     | NSFL1 cofactor p47 (XV body-associate protein XY40) (p97 cofactor p47)                                                                                                                                                                                                                                                                                                                           | Nsf1lc  | NSF1C_RAT  | 0,241318255  | 0,0474294  | 5,08794639 | 0,00380875 | 0,00952517            |
| P63142     | Nucleoside diphosphate kinase A (NOKA) (NOPkinase A) (EC 2.7.4.6) (Metastasis inhibitory factor NM23) (Tumor metastatic process-associated protein)                                                                                                                                                                                                                                              | Nimel   | NDKA_RAT   | 0,28354422   | 0,08297535 | 3,41721043 | 15         | 0,00382045 0,00953791 |
| P62703     | NADH dehydrogenase [ubiquinone] 1 alpha subcomplex subunit 10, mitochondrial (Complex I-42kD) (CI-42kD) (NADH-ubiquinone oxidoreductase 42 kDa subunit)                                                                                                                                                                                                                                          | Ndufa10 | NDUAA_RAT  | 0,251325249  | 0,08577587 | 2,93002263 | 158        | 0,00389181 0,00969927 |
| Q61M X7    | Signal transducer and activator of transcription 3                                                                                                                                                                                                                                                                                                                                               | Stat3   | STAT3_RAT  | -0,51495806  | 0,12191017 | -4,2240781 |            | 0,00391676 0,00974462 |
| P48679     | Calcium-regulated heat stable protein 1 (Calcium-regulated heat-stable protein of 24 kDa) (CRHSP-24)                                                                                                                                                                                                                                                                                             | Carhsp1 | CHSP1_RAT  | 0,389308305  | 0,07746942 | 5,02531564 |            | 0,00401685 0,00997645 |
| P61589     | Coronin-1A (Coronin-like protein A) (Clipin-A) (Tryptophan aspartate-containing coat protein) (TACO)                                                                                                                                                                                                                                                                                             | Coro1a  | COR1A_RAT  | 0,475527829  | 0,1632369  | 2,91311484 | 162        | 0,00408407 0,01012596 |
| Q6P751     | 40S ribosomal protein S23                                                                                                                                                                                                                                                                                                                                                                        | Rps23   | R523_RAT   | 0,236719435  | 0,06212071 | 3,8106361  |            | 0,00414907 0,01026949 |
| P12346     | ADP-ribosylation factor 1                                                                                                                                                                                                                                                                                                                                                                        | Arf1    | ARF1_RAT   | 0,493882451  | 0,17009798 | 2,90351742 | 148        | 0,00425531 0,0105144  |
|            | Aspartate aminotransferase, mitochondrial (mAspAT) (EC 2.6.1.1) (EC 2.6.1.7) (Fatty acid-binding protein) (FABP-1) (Glutamate oxaloacetate transaminase 2) (Kynurenine aminotransferase 4) (Kynurenine aminotransferase IV) (Kynurenine-oxoglutarate transaminase 4) (Kynurenine-oxoglutarate transaminase IV) (Plasma membrane-associated fatty acid-binding protein) (FABPpm) (Transaminase A) | Got2    | MAATM_RAT  | 0,192883383  | 0,06692865 | 2,88192548 | 276        | 0,00426311 0,01051566 |
| Q05987     | T-complex protein 1 subunit alpha (TCP-1-alpha) (CCT-alpha)                                                                                                                                                                                                                                                                                                                                      | Cct1    | CCT1_RAT   | -0,542240843 | 0,16346197 | -3,3172294 | 16         | 0,00435819 0,01073185 |
| Q05982     | Alpha-2-macroglobulin receptor-associated protein (Alpha-2-MRAP) (Gp330-binding 45 kDa protein) (Low density lipoprotein receptor-related protein-associated protein 1) (RAP)                                                                                                                                                                                                                    | Lrpap1  | AMRP_RAT   | -0,424450367 | 0,14585384 | -2,9101075 | 91         | 0,00454162 0,0111645  |
| Q56150     | Cotachman subunit gamma-1 (Gamma-1-coat protein) (Gamma-1-COP)                                                                                                                                                                                                                                                                                                                                   | Copg1   | COPG1_RAT  | -0,460710929 | 0,15710624 | -2,9324801 | 69         | 0,0045595 0,01118938  |
| P52631     | Retinal-binding protein 1 (Cellular retinal-binding protein) (CRBP) (Cellular retinal-binding protein I) (CRBP-I)                                                                                                                                                                                                                                                                                | Rbp1    | RBP1_RAT   | -0,488980665 | 0,16279022 | -3,0037472 | 40         | 0,004584 0,0112304    |
| Q9WU49     | Solute carrier family 2, facilitated glucose transporter member 3 (Glucose 2,3-glucose 1,3-GITR 3)                                                                                                                                                                                                                                                                                               | Rp15    | R15_RAT    | -0,281593781 | 0,09699581 | -2,903154  | 92         | 0,00462401 0,01130924 |
| Q912N1     | 40S ribosomal protein S15 (R1G protein)                                                                                                                                                                                                                                                                                                                                                          | Rps15   | R15_RAT    | 0,426889238  | 0,14359764 | 2,97281504 | 46         | 0,00468363 0,01143565 |
| P62268     | Citrate lyase subunit beta-like protein, mitochondrial (Citrate lyase beta-like) (EC 4.1.1.1)                                                                                                                                                                                                                                                                                                    | Clybl   | CLYBL_RAT  | -0,485790539 | 0,15836071 | -3,0676203 | 28         | 0,00474882 0,01157524 |
| P61212     | V-type proton ATPase 16 kDa proteolipid subunit (V-ATPase 16 kDa proteolipid subunit) (Vacuolar proton pump 16 kDa proteolipid subunit) (V-ATPase 16 kDa proteolipid subunit)                                                                                                                                                                                                                    | Vat1f   | VAT1F_RAT  | 0,190663089  | 0,06744019 | 2,82714339 | 402        | 0,0049312 0,01199953  |
| P00507     | Swi5-dependent recombination DNA repair protein 1 homolog (Liver regeneration-related protein LRRGT00030) (Meiosis protein 5 homolog)                                                                                                                                                                                                                                                            | Sfr1    | SFR1_RAT   | 0,148810063  | 0,05273945 | 2,82160839 | 488        | 0,00497322 0,01206937 |
| P28480     |                                                                                                                                                                                                                                                                                                                                                                                                  |         |            |              |            |            |            |                       |
| Q99068     | Coiled-coil domain-containing protein 134                                                                                                                                                                                                                                                                                                                                                        | Ccdc134 | CC134_RAT  | 0,340056235  | 0,09208914 | 3,69268562 |            | 0,00497663 0,01206937 |
| CON_007008 | Dehydrogenase 5-carboxylate dehydrogenase, mitochondrial (P5C dehydrogenase) (EC 1.2.1.88) (Aldehyde dehydrogenase family 4 member A1) (L-glutamate gamma-semialdehyde dehydrogenase)                                                                                                                                                                                                            | Aldh4a1 | AL4A1_RAT  | -0,720285244 | 0,24644674 | -2,9226811 | 55         | 0,00502809 0,01217372 |
|            | Cytochrome b-c1 complex subunit 2, mitochondrial 1 (Complex III subunit 2) (Core protein II) (Ubiquinol-cytochrome c reductase complex core protein 2)                                                                                                                                                                                                                                           | Uqcrc2  | QCR2_RAT   | -0,455695703 | 0,15389327 | -2,9611153 | 41         | 0,00507861 0,01227542 |
| Q4AEF8     | Tropomyosin alpha-4 chain (Tropomyosin in-4) (TM-4)                                                                                                                                                                                                                                                                                                                                              | Tpm4    | TPM4_RAT   | -0,567528977 | 0,10241831 | -5,5412841 |            | 0,00518616 0,01251444 |
| P02696     | AP-2-associated protein kinase 1 (EC 2.7.11.1) (Adaptor-associated kinase 1)                                                                                                                                                                                                                                                                                                                     | Aak1    | AAK1_RAT   | -1,6854326   | 0,35694448 | -4,7218341 |            | 0,00523406 0,01255605 |
| Q07647     | Eukaryotic translation initiation factor 2 subunit 3 (Eukaryotic translation initiation factor 2 subunit gamma) (eIF-2-gamma) (PP42)                                                                                                                                                                                                                                                             | Eif2s3  | EIF2G_RAT  | 0,341680943  | 0,07993825 | 4,27431106 |            | 0,00523821 0,01255605 |
| P62845     | Guanine nucleotide-binding protein subunit beta-2-like 1 (Receptor-activated C kinase) (Receptor-activated protein kinase C1) (RACK1) (Cleaved into: Guanine nucleotide-binding protein subunit beta-2-like 1, N-terminally processed)                                                                                                                                                           | Gnb2l1  | GBLP_RAT   | -0,406695957 | 0,11441791 | -3,5544781 | 10         | 0,0052291 0,01255605  |
| Q510K3     | Trifunctional enzyme subunit alpha 1, mitochondrial (TP-alpha 1) (Includes: Long-chain NADH-CoA hydratase (EC 4.2.1.17); long-chain 3-hydroxyacyl-CoA dehydrogenase (EC 1.1.1.211))                                                                                                                                                                                                              | Hadha   | ECHA_RAT   | 0,391995245  | 0,13047127 | 3,00445652 | 31         | 0,00522933 0,01255605 |
| P63081     | Carbonic anhydrase 1 (EC 4.2.1.1) (Carbonate dehydratase I) (Carbonic anhydrase I) (CA-I)                                                                                                                                                                                                                                                                                                        | Cal     | CA1_RAT    | 0,757282862  | 0,13759971 | 5,50352094 |            | 0,00531584 0,01272098 |
| Q6TXG9     | Nucleosome core protein 2                                                                                                                                                                                                                                                                                                                                                                        | Nudcd2  | NUDC2_RAT  | -0,725273177 | 0,1991649  | -3,6415713 |            | 0,0053877 0,0128716   |
| Q5M862     | 40S ribosomal protein S27                                                                                                                                                                                                                                                                                                                                                                        | Rps27   | R527_RAT   | -0,593511201 | 0,20454483 | -2,9016191 | 49         | 0,00554752 0,01323153 |
| POC2X9     | FACT complex subunit SSRP1 (Facilitates chromatin transcription complex subunit SSRP1) (Recombines on signal sequence recognition protein 1) (Structure-specific recognition protein 1) (T160)                                                                                                                                                                                                   | Ssrp1   | CIIDBP_RAT | 0,178611766  | 0,06353636 | 2,81117386 | 151        | 0,00559139 0,01331072 |
| P32551     | Cooper transport protein ATOX1 (ATX1 homolog protein Rahl) (Metalloprotein transport protein ATX1)                                                                                                                                                                                                                                                                                               | Atox1   | RAHL_RAT   | 0,291230259  | 0,10231402 | 2,84643553 | 81         | 0,00559917 0,01331072 |
| P09495     | Regulating synaptic membrane exocytosis protein 3 (Nim3) (RIM3 gamma) (Ra-b-3-interacting molecule 3) (RIM3)                                                                                                                                                                                                                                                                                     | Rims3   | NIM3_RAT   | 0,134423065  | 0,04848337 | 2,77256    | 384        | 0,00583272 0,01382038 |
| POC1X8     | COP9 signalosome complex subunit 3 (SGN3) (Signalosome subunit 3) (Neurochordin) (Neurochordin-related protein from the rat brain) (Norbin)                                                                                                                                                                                                                                                      | Cops3   | CSN3_RAT   | 0,129278224  | 0,04586219 | 2,81884106 | 98         | 0,00583188 0,01382038 |
| P63245     | 5-oxoprolinase (EC 3.5.2.9) (5-oxo-L-prolinease) (5-OPase) (Pyroglutaminase)                                                                                                                                                                                                                                                                                                                     | Ncdn    | NCDN_RAT   | 0,383122461  | 0,1366075  | 2,80454934 | 110        | 0,00595867 0,01409568 |
| Q64428     | Serine/threonine-protein phosphatase 2A catalytic subunit alpha isoform (PP2A-alpha) (EC 3.1.3.16)                                                                                                                                                                                                                                                                                               | Oplah   | OPLA_RAT   | -0,244481042 | 0,08781693 | -2,7839854 | 163        | 0,00600485 0,0141585  |
| BOBNN3     | Fatty acid-binding protein, heart (Fatty acid-binding protein 3) (Heart-type fatty acid-binding protein) (H-FABP)                                                                                                                                                                                                                                                                                | Ppp2ca  | PP2AA_RAT  | 0,247770687  | 0,0880163  | 2,8150546  | 89         | 0,00600385 0,0141585  |
| Q5M823     | COP9 signalosome complex subunit 8 (SGN8) (Signalosome subunit 8) (COP9 homolog) (JAB1-containing signalosome subunit 8)                                                                                                                                                                                                                                                                         | Fabp3   | FABPH_RAT  | 0,374678204  | 0,12763401 | 2,9355672  | 32         | 0,00611892 0,01440393 |
| Q71TY3     | CaM kinase-like vesicle-associated protein (1G5)                                                                                                                                                                                                                                                                                                                                                 | Cops8   | CSN8_RAT   | 0,295037647  | 0,09642721 | 3,05969276 | 20         | 0,00618434 0,01453421 |
| Q04931     | Nucleosome core protein 2                                                                                                                                                                                                                                                                                                                                                                        | Camk1g5 | CAMKV_RAT  | -0,205535207 | 0,06528349 | -3,1483491 | 16         | 0,0062167 0,0145865   |
| Q9WUC4     | Secretogranin-2 (Chromogranin C) (Secretogranin II) (Sgl1) (Cleaved into: Secretoneurin (SN))                                                                                                                                                                                                                                                                                                    | Nestn   | NICA_RAT   | -0,767926715 | 0,26338534 | -2,9156016 | 34         | 0,006243 0,01462442   |
| Q9JIR3     | Serine/threonine-protein kinase PAK3 (EC 2.7.11.1) (Beta-PAK) (p21-activated kinase 3) (PAK-3) (p65-PAK)                                                                                                                                                                                                                                                                                         | eg2     | CHGEG2_RAT | 0,46666443   | 0,10395317 | 4,48917928 |            | 0,0064637 0,01511688  |
| Q68FW9     | Translation initiation factor eIF-2B subunit beta (eIF-2B-GDP-GTP exchange factor subunit beta)                                                                                                                                                                                                                                                                                                  | Pak3    | PAK3_RAT   | -0,486010193 | 0,17401039 | -2,7929953 | 78         | 0,00656672 0,01533298 |
| Q35095     | Complex C3 (Cleaved into: Complex C3 beta chain; Complex C3 alpha chain (ENCF-1) (Neutrophil chemotactic factor-I); Neutrophil chemotactic factor-2 (ENCF-2); C3a anaphylatoxin; Acylation stimulating protein (ASP) (C3ad esArg); Complement C3b alpha chain; Complement C3c alpha chain fragment I; Complex C3d fragment; Complement C3f fragment; Complement C3c alpha chain fragment 2)      | Eif2b2  | EIF2BB_RAT | -0,3042486   | 0,11141597 | -2,7307451 | 326        | 0,00666284 0,01553227 |
| P97608     | Genetral vesicular transport factor p115 (Protein USOL homolog) (Transcytosis-associated protein) (TAP) (Vesicle-docking protein)                                                                                                                                                                                                                                                                | Usol    | VDP_RAT    | 0,155236883  | 0,05008185 | 3,09966329 | 16         | 0,00688473 0,01599786 |
| P63331     | Calcium/calmodulin-dependent protein kinase type II subunit alpha (CaM kinase II subunit alpha) (CaMK-II subunit alpha) (EC 2.7.11.17)                                                                                                                                                                                                                                                           | Camk2a  | KCC2A_RAT  | 0,48463028   | 0,17214146 | 2,81530247 | 51         | 0,00690993 0,0160306  |
| P07483     | Microtubule-associated protein RPB/EB family member 1 (APC-binding protein EBI) (End-binding protein 1) (EB1)                                                                                                                                                                                                                                                                                    | Mapre1  | MARE1_RAT  | -0,218131759 | 0,07883443 | -2,7669606 | 83         | 0,00697412 0,01614136 |
| Q6P429     | Eukaryotic peptide chain release factor subunit 1 (Eukaryotic release factor 1) (eRF1)                                                                                                                                                                                                                                                                                                           | Etfl    | ERF1_RAT   | 0,197359769  | 0,07036016 | 2,80499332 | 54         | 0,00698005 0,01614136 |
| Q63092     | 40S ribosomal protein S16                                                                                                                                                                                                                                                                                                                                                                        | Rps16   | RS16_RAT   | -0,459586639 | 0,14393858 | -3,1929357 | 13         | 0,007063 0,01630704   |
| Q8CGU6     | 60S ribosomal protein S14                                                                                                                                                                                                                                                                                                                                                                        | Rpl34   | RL34_RAT   | 0,236022594  | 0,08698991 | 2,71321813 | 194        | 0,00726288 0,01674175 |
| P10362     |                                                                                                                                                                                                                                                                                                                                                                                                  |         |            |              |            |            |            |                       |

|            |                                                                                                                                                                                                                                                                                           |                         |                       |                        |                       |                       |  |
|------------|-------------------------------------------------------------------------------------------------------------------------------------------------------------------------------------------------------------------------------------------------------------------------------------------|-------------------------|-----------------------|------------------------|-----------------------|-----------------------|--|
| Q62829     | Fibroblast growth factor 1 (FGF-1) (Acidic fibroblast growth factor) (aFGF):gflfg 1 Fgfc FGF1_RAT<br>(Heparin-binding growth factor 1) (HBGF-1)                                                                                                                                           | -                       |                       |                        |                       |                       |  |
| Q62818     | Phenylalanine--tRNA ligase alpha subunit (EC 6.1.1.20) (Phenylalanyl-tRNA synthetase alpha subunit) (PheRS)<br>8-oxo-dGDP phosphatase NUDT18 (EC 3.6.1.58) (2-hydroxy-dADP                                                                                                                | Farsa Farsla SYFA_RAT   | 0,174180566           | 0,06311761 2,75961901  | 74                    | 0,00728959 0,01677651 |  |
|            |                                                                                                                                                                                                                                                                                           |                         | 0,264175693           | 0,09180621 2,8775361   | 30                    | 0,00731596 0,0168104  |  |
| P01026     | phosphatase) (7,8-dihydro-8-oxoguanine phosphatase) (Muff homolog Nudt18 Mth3 NUD18_RAT<br>3) (Nucleoside diphosphate-linked moiety X motif 18) (Nudix motif 18)                                                                                                                          |                         | 0,175050858           | 0,06494161 2,69551164  | 328                   | 0,00739038 0,01695439 |  |
| P41542     | Acylamino-acid-releasing enzyme (AARE) (EC 3.4.19.1) (Acyl-peptide hydrolase) (APH) (Acylaminoacyl-peptidase)                                                                                                                                                                             | Apch ACPH_RAT           | 0,232506896           | 0,08610914 2,70014203  | 195                   | 0,00754041 0,01726712 |  |
| P11275     | Gastrin-releasing peptide (GRP) [Cleaved into: Neuropeptide Y (GRP-10)]                                                                                                                                                                                                                   | Gp GRP_RAT              | -0,528784507          | 0,18901502 -2,7975793  | 45                    | 0,00755062 0,01726712 |  |
| Q66HR2     | ADP/ATP translocase 1 (ADP/ATP carrier protein 1) (Adenine nucleotide SLC25_4 Antl ADT1_RAT<br>translocator 1) (ANT 1) (Solute carrier family 25 member 4)                                                                                                                                |                         | 0,218412696           | 0,07552985 2,89174013  | 26                    | 0,00764196 0,01744834 |  |
| QSU2Q7     | Ubiquitin-like co-nucleic acid synthetase (UBQL) (Autophagy-related protein 3) (APG3-like) (Preconditioning-inducible gene 1 protein)<br>BAG family molecular chaperone regulator 5 (BAG-5) (Bcl-2-associated                                                                             | Atg3 Apg3l ATG3_RAT     | -0,911555643          | 0,28955028 -3,14817774 | 13                    | 0,0076986 0,0175311   |  |
| P62250     | athanogene 5)                                                                                                                                                                                                                                                                             | Bags BAGS_RAT           | 0,21575346            | 0,07855658 2,74647208  | 68                    | 0,00770251 0,0175311  |  |
| P11250     | Small ubiquitin-related modifier 1 (SUMO-1)                                                                                                                                                                                                                                               | Sumo1 SUMO1_RAT         | 0,177400305           | 0,05648197 3,14083062  | 13                    | 0,00780826 0,01774382 |  |
| P61149     | 6-phosphogluconolactonase (6PGL) (EC 3.1.1.31)                                                                                                                                                                                                                                            | Pgls 6PGL_RAT           | -0,319174737          | -0,319174737           | 38                    | 0,00786641 0,01784785 |  |
| Q505J8     | Zinc transporter 3 (ZnT-3) (Solute carrier family 30 member 3)<br>Dynein light chain roadblock-type 1 (Bithoraxoid-like protein) (BLP)                                                                                                                                                    | Slc30a3 Znt3 ZNT3_RAT   | -0,263921561          | 0,0960585 -2,7475087   | 57                    | 0,0080252 0,01817953  |  |
| Q641Y7     | (robl/LC7-like protein) (Dynein light chain 2A, cytoplasmic) (Dynein-associated protein Km23)                                                                                                                                                                                             | rbl Dnc12a Dr DLRL1_RAT | 0,214016225           | 0,07039983 3,0400107   |                       | 0,00827024 0,01870526 |  |
| P13676     | Leucine carboxyl-terminal hydrolase isozyme L3 (UCH-L3) (EC 3.4.19.12) (Ubiquitin thioesterase L3)                                                                                                                                                                                        | Lcmt1 LCMT1_RAT         | -0,219453208          | 0,08223553 -2,6685935  | 171                   | 0,00835015 0,01885644 |  |
| P24393     | cGMP-dependent 3',5'-cyclic phosphodiesterase (EC 3.1.4.17) (Cyclic GMP-stimulated phosphodiesterase) (CGS-PDE) (cGSPDE)                                                                                                                                                                  | Pde2a PDE2A_RAT         | -0,416761758          | 0,10799607 -3,8590457  |                       | 0,00837157 0,01887527 |  |
| CON_007044 | Isocitrate dehydrogenase [NAD+] subunit alpha, mitochondrial (EC 1.1.1.41) (Isocitric dehydrogenase subunit alpha) (NAD(+)-specific ICDH subunit alpha)                                                                                                                                   | Idh3a IDH3A_RAT         | 0,167379699           | 0,0596434 2,80634082   | 32                    | 0,00845841 0,01904132 |  |
| Q05962     | Cytochrome b-c1 complex subunit 1, mitochondrial (Complex III subunit 1) (Core protein 1) (Ubiquinol-cytochrome-c reductase complex core protein 1)                                                                                                                                       | Uqcrc1 QCRI_RAT         | 0,14330937            | 0,05340459 2,68346545  | 87                    | 0,00872105 0,019602   |  |
|            | ATP-sensitive inward rectifier potassium channel 10 (ATP-sensitive inward rectifier potassium channel KAB-2) (BIRIO) (Brain-specific inwardly rectifying K+) channel 1) (BIRK1) (Inward rectifier K+ channel Kir4.1) (Potassium channel, inwardly rectifying K subfamily J member 10)     | Kcnj10Ka b-2 KCJ10_RAT  | -0,555043561          | 0,20092238 -2,7624775  | 36                    | 0,00897757 0,02014718 |  |
| Q6AZ50     | Neurofibromin (Neurofibromatosis-related protein NF-1)                                                                                                                                                                                                                                    | Nfl NFI_RAT             | -0,17080815           | 0,06120394 -2,790803   | 30                    | 0,00905434 0,0202879  |  |
| QSI0H3     | Nucleolar protein 3 (Apoptosis repressor with CARD)                                                                                                                                                                                                                                       | Nol3 Arc NOL3_RAT       | 0,450682765           | 0,14351318 3,14035804  | 11                    | 0,0094024 0,02102974  |  |
| P85971     | Sortilin [Glycoprotein 110] (Gp110) (Neurotensin receptor 3) (NTR3) NEDD8-activating enzyme E1 catalytic subunit (EC 6.3.2.-) (NEDD8-activating enzyme E1C) (Ubiquitin-activating enzyme E1C) (Ubiquitin-activating enzyme 3) (Ubiquitin-activating enzyme 3)                             | Sort1 SORT1_RAT         | -0,195914265          | 0,0744833 -2,6303114   | 151                   | 0,00941456 0,02102974 |  |
| Q6Q1X3     | Acidic leucine-rich nuclear phosphoprotein 32 family member E                                                                                                                                                                                                                             | Anp32e AN32E_RAT        | -0,319965258          | 0,12124918 -2,6389066  | 81                    | 0,00997267 0,02220766 |  |
| Q6P4Z6     | Endophilin-B2 (SH3 domain-containing GRB2-like protein B2) Mitogen-activated protein kinase 10 (MAP kinase 10) (MAPK 10) (EC 2.7.11.24) (SAPK-beta) (Stress-activated protein kinase JNK3) (c-Jun N-terminal kinase 3) (p54-beta)                                                         | Sh3glb2 SHLB2_RAT       | -0,27095088           | 0,08589579 -3,1544141  | 10                    | 0,01025571 0,02280276 |  |
| Q01062     | Ubiquitin carboxyl-terminal hydrolase isozyme L3 (UCH-L3) (EC 3.4.19.12) (Ubiquitin thioesterase L3)                                                                                                                                                                                      | Uch13 UCHL3_RAT         | 0,284780425           | 0,14055733 2,58053018  | 172                   | 0,01066975 0,02365544 |  |
| Q99NA5     | Serine--tRNA ligase, cytoplasmic (EC 6.1.1.11) (Seryl-tRNA synthetase) (SerRS) [Seryl-tRNA (Ser/Sec) synthetase]                                                                                                                                                                          | Sars Sarsl SYSC_RAT     | -0,525409903          | 0,20002519 -2,6267187  | 59                    | 0,01096739 0,02423574 |  |
| Q68FY0     | 60S ribosomal protein L7a                                                                                                                                                                                                                                                                 | Rpl7a RL7A_RAT          | 0,339740071           | 0,12256834 2,77184202  | 22                    | 0,01112346 0,02454305 |  |
| P49655     | Interferon-inducible double-stranded RNA-dependent protein kinase activator A (Protein activator of the interferon-induced protein kinase) (Protein kinase, interferon-inducible double-stranded RNA-dependent activator)                                                                 | Prkra PRKRA_RAT         | -0,33335769           | 0,1280708 -2,6029171   | 70                    | 0,01127559 0,02484072 |  |
| Q62881     |                                                                                                                                                                                                                                                                                           |                         | -0,26936759           | 0,09803325 -2,7477166  | 23                    | 0,01146376 0,02521679 |  |
| 054861     | Calcium-dependent secretion activator 1 (Calcium-dependent activator protein for secretion 1) (CAPS-1) (rCAPS)                                                                                                                                                                            |                         | -0,233410156          | 0,08864761 -2,6330114  | 45                    | 0,01155739 0,02538405 |  |
| Q99M17     | Methionine adenosyltransferase 2 subunit beta (Methionine adenosyltransferase II beta) (MAT II beta)                                                                                                                                                                                      | Mat2b MAT2B_RAT         |                       | 0,08203601 -3,5703859  |                       | 0,0117787 0,02575253  |  |
| QSXIE0     | Nucleosome assembly protein 1-like 1 (NAP-1-related protein) Calcium/calmodulin-dependent protein kinase kinase 2 (CaM-KK 2) (CaM-kinase kinase 2) (CaMKK 2) (EC 2.7.11.17) (Calcium/calmodulin-dependent protein kinase kinase beta) (CaM-KK beta) (CaM-kinase kinase beta) (CaMKK beta) | Nap1l1 Nrp NP1L1_RAT    | -0,292900215          | 0,08203601 -3,5703859  |                       | 0,0117787 0,02575253  |  |
| QSPJP9     | Rho-related GTP-binding protein RhoB                                                                                                                                                                                                                                                      | Rhob Arhb RHOB_RAT      | -0,684229472          | 0,25745613 -2,6576546  | 35                    | 0,01177802 0,02575253 |  |
| P49187     | Histidine triad nucleotide-binding protein 3 (HINT-3) (EC 3.-.-.-) (HINT-4)                                                                                                                                                                                                               | Hint3 Hint4 HINT3_RAT   | 0,307763374           | 0,11956233 2,57408316  | 83                    | 0,01182665 0,02581823 |  |
| Q91Y78     | Beta-enolase (EC 4.2.1.11) (2-phospho-D-glycerate hydro-lyase) (Enolase 3) (Muscle-specific enolase) (MSE) (Skeletal muscle enolase)                                                                                                                                                      | Eno3 ENO3_RAT           | -0,345198235          | 0,13335887 -2,5884911  | 53                    | 0,01241421 0,02705997 |  |
| P11232     | Glycolipid transfer protein (GLTP)                                                                                                                                                                                                                                                        | GLTP GLTP_RAT           | -0,203348076          | 0,08083987 -2,5154429  | 284                   | 0,01244033 0,02707601 |  |
| Q6P799     | 3-mercaptopyruvate sulfurtransferase (MST) (EC 2.8.1.2)                                                                                                                                                                                                                                   | Mpst THMT_RAT           | -0,259825192          | 0,1005285 -2,5845923   | 52                    | 0,01259554 0,02737254 |  |
| P62425     | ZW10 interactor (SNAP25-interacting protein 30) (Scoilin) (ZW10-interacting protein 1) (Zwint-1)                                                                                                                                                                                          | Zwint Sip30 ZWINT_RAT   | -0,897613472          | 0,33517545 -2,6780406  | 26                    | 0,01266272 0,02747715 |  |
| Q4V8C7     | 60S ribosomal protein L14                                                                                                                                                                                                                                                                 | Rpl14 RL14_RAT          | -0,177864562          | 0,07130884 -2,4942848  | 530                   | 0,01292463 0,02800336 |  |
| Q62717     | WO repeat-containing protein 7 (TGF-beta resistance-associated protein TRAG)                                                                                                                                                                                                              | Wdr7Trag WDR7_RAT       | -0,437219229          | 0,16511992 -2,6478891  | 28                    | 0,01315288 0,02845518 |  |
| QSU2R0     |                                                                                                                                                                                                                                                                                           | Tagln2 TAGL2_RAT        | -0,540591655          | 0,20558511 -2,6295272  | 30                    | 0,01335771 0,02881193 |  |
| Q922G8     | Transgelin-2                                                                                                                                                                                                                                                                              |                         |                       |                        |                       |                       |  |
| 088831     | Heat shock protein beta-1 (HspB1) (Heat shock 27 kDa protein) (HSP 27)                                                                                                                                                                                                                    | Hspb1 Hsp27 HSPB1_RAT   | -0,502823592          | 0,19318161 -2,6028543  | 36                    | 0,01334222 0,02881193 |  |
| CON_007131 | Ribonuclease inhibitor (Ribonuclease/angiogenin inhibitor 1)                                                                                                                                                                                                                              | Rnhl Rnh RINI_RAT       | -0,255755693          | 0,09975609 -2,5638103  | 49                    | 0,01347134 0,02901366 |  |
|            | Serine/threonine-protein phosphatase 2B catalytic subunit beta isoform (EC 3.1.3.16) (CAM-PRP catalytic subunit) (Calmodulin-dependent calcineurin A subunit beta isoform)                                                                                                                | Ppp3cb PP2BB_RAT        | -0,636084548          | 0,22737897 -2,7974643  |                       | 0,01352876 0,02909389 |  |
| P62747     |                                                                                                                                                                                                                                                                                           |                         |                       |                        |                       |                       |  |
| Q8K3P7     | Eukaryotic translation initiation factor 2 subunit 1 (Eukaryotic translation Initiation factor 2 subunit alpha) (eIF-2-alpha) (eIF-2A) (eIF-2alpha)                                                                                                                                       | IF2A_RAT                | 0,568763771           | 0,21199007 2,68297369  | 22                    | 0,01358743 0,02917658 |  |
| P15429     | Cotaxone subunit beta' (Beta'-coat protein) (Beta'-COP) (p102)                                                                                                                                                                                                                            | Copb2 COPB2_RAT         | 0,576575253           | 0,19658647 2,93292069  | 11                    | 0,01361909 0,02920111 |  |
| B0BNM9     | Importin subunit beta-1 (Karyopherin subunit beta-1) (Nuclear factor p97) (Pore targeting complex 97 kDa subunit) (PTAC97) van Willebrand factor A domain-containing protein SA (Loss of                                                                                                  | Kpnbl IMB1_RAT          | -0,338285198          | 0,13455165 -2,5141661  | 82                    | 0,01388699 0,02973135 |  |
|            |                                                                                                                                                                                                                                                                                           |                         | -0,319863316          | 0,12732093 -2,5122603  | 79                    | 0,01403333 0,03000015 |  |
| P97532     | heterozygosity 11 chromosomal region 2 gene A protein homolog) (MastA Lohller2a WWASA_RAT<br>cell surface antigen 1) (Masa-1)                                                                                                                                                             |                         | 0,263640754           | 0,10379756 2,53995146  |                       | 0,01417603 0,03026037 |  |
| Q8VIL3     | Alanyl-tRNA editing protein in Aarsdl (Alanyl-tRNA synthetase domain-containing protein 1)                                                                                                                                                                                                |                         |                       |                        |                       |                       |  |
| Q63507     | Capza2 CAZA2_RAT                                                                                                                                                                                                                                                                          | Capza2 CAZA2_RAT        | 0,864862305           | 0,10379756 2,53995146  |                       | 0,01417603 0,03026037 |  |
| Q9ERH3     | ATP5i ATP5I_RAT                                                                                                                                                                                                                                                                           | Atp5i ATP5I_RAT         | -1,420056822          | 0,49123821 -2,8907702  |                       | 0,0146856 0,03124934  |  |
|            | Gpd1 GPDA_RAT                                                                                                                                                                                                                                                                             | Gpd1 GPDA_RAT           | 0,10336292 -2,4604757 | 172                    | 0,01486317 0,03154053 |                       |  |
|            | Stx12 Stx13 STX12_RAT                                                                                                                                                                                                                                                                     | Stx12 Stx13 STX12_RAT   | 0,158116902           | 0,06445312 2,45320802  | 193                   | 0,01504654 0,03188276 |  |
|            | Albg AIBG_RAT                                                                                                                                                                                                                                                                             | Albg AIBG_RAT           |                       |                        |                       |                       |  |

|                                                                                                                                                                                      |        |                                    |        |           |              |            |            |     |                       |
|--------------------------------------------------------------------------------------------------------------------------------------------------------------------------------------|--------|------------------------------------|--------|-----------|--------------|------------|------------|-----|-----------------------|
| Alpha-<br>1B-<br>glycoprotein<br>(C44)<br>(Liver<br>regeneration-<br>related<br>protein<br>1)<br>Sorbitol<br>dehydrogenase<br>(EC<br>1.1.1.14)<br>(L-<br>iditol 2-<br>dehydrogenase) | Aarsdl | AASDI_RAT                          |        |           |              |            |            |     |                       |
| P68101                                                                                                                                                                               |        | Protein prune homolog (EC 3.6.1.1) | Prune  | PRUNE_RAT | -0,352736023 | 0,13814435 | -2,5533873 | 35  | 0,01518226 0,03210206 |
| 035142                                                                                                                                                                               |        | 40S ribosomal protein S17          | Rps17  | RS17_RAT  | 0,179770028  | 0,0720853  | 2,49385139 | 64  | 0,01523113 0,03213235 |
| P52296                                                                                                                                                                               |        | Calycalin-binding protein (CacyBP) | Cacybp | CYBP_RAT  | -0,154331477 | 0,06315505 | -2,4436917 | 220 | 0,01532535 0,03228392 |



|            |                                                                                                                                                                                                                                                                                                                                                                                                                                                                    |          |                   |              |            |            |            |            |
|------------|--------------------------------------------------------------------------------------------------------------------------------------------------------------------------------------------------------------------------------------------------------------------------------------------------------------------------------------------------------------------------------------------------------------------------------------------------------------------|----------|-------------------|--------------|------------|------------|------------|------------|
| Q75WE7     | Thiopurine 5-methyltransferase (EC 2.1.1.67) (Thiopurine methyltransferase)                                                                                                                                                                                                                                                                                                                                                                                        | Tpmt     | TPMT_RAT          | -0,595174846 | 0,18714726 | -3,1802487 | 0,01548529 | 0,03257328 |
| Q5XI97     | Microtubule-associated protein 1A (MAP-1A) [Cleaved into: MAP1A heavy chain; MAP1 light chain LC2]                                                                                                                                                                                                                                                                                                                                                                 | Map1a    | Map1a_RAT         | -0,170914154 | 0,06825659 | -2,5039948 | 0,01558832 | 0,03274227 |
| Q3TIK5     | Cytochrome b-c1 complex subunit 6, mitochondrial (Complex III subunit 6) (Complex III subunit VIII) (Cytochrome c1 non-heme 11 kDa protein)                                                                                                                                                                                                                                                                                                                        | Uqcrc    | QCR6_RAT          | -0,295351525 | 0,12079166 | -2,4451317 | 0,0156953  | 0,03291907 |
| P29419     | (Mitochondrial hinge protein) (Ubiquinol-cytochrome c reductase complex 11 kDa protein)                                                                                                                                                                                                                                                                                                                                                                            |          |                   |              |            |            |            |            |
|            | ADP-ribosylation factor 5                                                                                                                                                                                                                                                                                                                                                                                                                                          | Arf5     | ARF5_RAT          | 0,274074903  | 0,1051561  | 2,60636243 | 0,01578338 | 0,03305575 |
|            | Fatty acid synthase (EC 2.3.1.85) [Includes: [Acyl-carrier-protein] 5-acetyltransferase (EC 2.3.1.38); [Acyl-carrier-protein] 5-malonyltransferase (EC 2.3.1.39); 3-oxoacyl-[acyl-carrier-protein] synthase (EC 2.3.1.41); 3-oxoacyl-[acyl-carrier-protein] reductase (EC 1.1.1.100); 3-hydroxyacyl-[acyl-carrier-protein] dehydratase (EC 4.2.1.59); Enoyl-[acyl-carrier-protein] reductase (EC 1.3.1.39); Oleoyl-[acyl-carrier-protein] hydrolase (EC 3.1.2.14)] | Fasn     | FAS_RAT           | -0,195253979 | 0,08053797 | -2,4243717 | 0,01581854 | 0,03308137 |
| 035077     | Renin receptor (ATPase H(+)-transporting lysosomal accessory protein 2) (ATPase H(+)-transporting lysosomal malin interacting protein 2) (Renin/prorenin receptor)                                                                                                                                                                                                                                                                                                 | tp6ap2   | Atp6i RENR_RAT    | -0,530510726 | 0,21202148 | -2,5021556 | 0,0158816  | 0,03311812 |
| G3V7PI     | Serine/threonine-protein phosphatase CPPEDI (EC 3.1.3.16) (Calcineurin-dependent Cstpl CPPED RAT)                                                                                                                                                                                                                                                                                                                                                                  |          |                   |              |            |            |            |            |
| CON_150456 | like phosphoesterase domain-containing protein 1                                                                                                                                                                                                                                                                                                                                                                                                                   |          |                   | 0,313231747  | 0,11615777 | 2,69660599 | 0,01588201 | 0,03311812 |
| Q9EPH1     | Very long-chain specific acyl-CoA dehydrogenase, mitochondrial (VLCAD) Acadv1 Vlcad ACADV RAT                                                                                                                                                                                                                                                                                                                                                                      |          |                   | 0,455616375  | 0,15414941 | 2,95568036 | 0,0160719  | 0,03346574 |
| P27867     | Aldehyde dehydrogenase X, mitochondrial (EC 1.2.1.3) (Aldehyde dehydrogenase family 1 member B1)                                                                                                                                                                                                                                                                                                                                                                   | Idh1b1   | Aldh1 ALIB1_RAT   | -0,140878861 | 0,05743739 | -2,4527379 | 0,01615045 | 0,03358083 |
|            | Peptidyl-prolyl cis-trans isomerase A (PPIase A) (EC 5.2.1.8) (Cyclophilin A) (Cyclosporin A-binding protein) (Rotamase A) (p1B15) (p31) [Cleaved into: Peptidyl-prolyl cis-trans isomerase A, N-terminal; processed]                                                                                                                                                                                                                                              | Ppia     | PPIA_RAT          | -1,026549251 | 0,41426067 | -2,4780273 | 0,01643122 | 0,03411547 |
| Q6AYG3     | Ig gamma-2A chain C region                                                                                                                                                                                                                                                                                                                                                                                                                                         | Igg2a    | IGG2A_RAT         | 0,191437003  | 0,07665152 | 2,49749783 | 0,01661383 | 0,03444504 |
| P04644     | Tropomodulin-1 (Erythrocyte tropomodulin) (E-Tmod)                                                                                                                                                                                                                                                                                                                                                                                                                 | Tmod1    | TmodTMOD1_RAT     | 0,138353678  | 0,05707646 | 2,42400596 | 0,01680543 | 0,03479231 |
| Q6AYK6     | Protein NDRG3 (N-myc downstream-regulated gene 3 protein)                                                                                                                                                                                                                                                                                                                                                                                                          | Ndr3     | Ndr3 NDRG3_RAT    | -0,451226958 | 0,14506339 | -3,1105503 | 0,01706805 | 0,03528538 |
| Q9ZOTO     | Potassium/sodium hyperpolarization-activated cyclic nucleotide-gated channel 2                                                                                                                                                                                                                                                                                                                                                                                     | Hcn2     | HCN2_RAT          | -0,097981231 | 0,04105224 | -2,3867448 | 0,0171042  | 0,03530954 |
| P34926     | Band 4.1-like protein 1 (Neuronal protein 4.1) (4.1 N)                                                                                                                                                                                                                                                                                                                                                                                                             | ib411    | Epb4.1 E41L1_RAT  | 0,138133642  | 0,0517206  | 2,67076641 | 0,01745141 | 0,03597483 |
| Q5M915     | 60S ribosomal protein L12                                                                                                                                                                                                                                                                                                                                                                                                                                          | Rpl12    | RL12_RAT          | -0,212628132 | 0,07128544 | -2,982771  | 0,01752615 | 0,03607737 |
| P84083     | Up-regulated during skeletal muscle growth protein 5 (Diabetes-associated protein in insulin-sensitive tissues)                                                                                                                                                                                                                                                                                                                                                    | Usmg5    | Dapit USMG5_RAT   | 0,113316534  | 0,04792312 | 2,36454818 | 0,01823462 | 0,03748227 |
| P12785     | Profilin-2 (Profilin II)                                                                                                                                                                                                                                                                                                                                                                                                                                           | Pfn2     | PROF2_RAT         | 0,177458663  | 0,06660104 | 2,66450287 | 0,01849759 | 0,03796875 |
| Q6AXS4     | Tumor susceptibility gene 101 protein (ESCRT-I complex subunit TSG101)                                                                                                                                                                                                                                                                                                                                                                                             | Tsg101   | TSIO1_RAT         | -0,213067076 | 0,08648909 | -2,4635138 | 0,01881854 | 0,03857265 |
| Q66H71     | ATP-binding cassette sub-family D member 3 (70 kDa peroxisomal membrane protein) (PMP70)                                                                                                                                                                                                                                                                                                                                                                           | d3 Pmp70 | Pxr ABCD3_RAT     | -0,290351927 | 0,12050819 | -2,4093957 | 0,01906418 | 0,03902072 |
| P45953     | Glycerophosphodiester phospholipase domain-containing protein 1 (EC 3.1.-.-)                                                                                                                                                                                                                                                                                                                                                                                       | Gdpd1    | GDPD1_RAT         | 0,272301013  | 0,11302796 | 2,4091473  | 0,01936544 | 0,0395812  |
| Q66HF8     | Tubulin beta-4B chain (Tubulin beta-2C chain)                                                                                                                                                                                                                                                                                                                                                                                                                      | ubb4b    | Tubb2 TBB4B_RAT   | 0,291264439  | 0,12418557 | 2,34539676 | 0,01960413 | 0,03995588 |
| P10III     | Prenylcysteine oxidase (EC 1.8.3.5) (Cholesterol pump-associated 55 kDa protein)                                                                                                                                                                                                                                                                                                                                                                                   | Pcyox1   | Clp55 PCYOX_RAT   | -0,253191612 | 0,09275805 | -2,7295918 | 0,01959263 | 0,03995588 |
| P20760     | Ras-related protein Rab-18                                                                                                                                                                                                                                                                                                                                                                                                                                         | Rab18    | RAB18_RAT         | 0,544184155  | 0,18772899 | 2,8987753  | 0,0199291  | 0,04053139 |
| P70567     | Neuronal cell adhesion molecule (Nr-CAM) (Ankyrin-binding cell adhesion molecule NrCAM) (Neuronal surface protein Bravo) (rBravo) (NgCAM-related cell adhesion molecule) (Ng-CAM-related)                                                                                                                                                                                                                                                                          | Nrcam    | NRCAM_RAT         | 0,130241536  | 0,05455853 | 2,38718905 | 0,01994268 | 0,04053139 |
| Q6AYR2     | Ubiquitin-associated protein 1 (UBAP-1)                                                                                                                                                                                                                                                                                                                                                                                                                            | Ubap1    | UBAP1_RAT         | -0,322830367 | 0,12180823 | -2,6503165 | 0,01999971 | 0,04059013 |
| Q9JKA9     | Syntaxin-binding protein 1 (N-Sec1) (Protein unc-18 homolog 1) (Unc18-1) (Protein unc-18 homolog A) (Unc-18A) (p67) (rbSec1)                                                                                                                                                                                                                                                                                                                                       | stxbp1   | Unc18-1 STXBI_RAT | -0,405088514 | 0,1707883  | -2,3718751 | 0,02007062 | 0,04061978 |
| Q9WTP0-2   | Tubulin beta-2B chain (T beta-15)                                                                                                                                                                                                                                                                                                                                                                                                                                  | ubb2b    | Tubb2 TBB2B_RAT   | 0,202777398  | 0,08608114 | 2,3556541  | 0,02004618 | 0,04061978 |
| P23358     | Eukaryotic translation initiation factor 3 subunit A (eIF3a) (Eukaryotic translation initiation factor 3 subunit 10) (eIF-3-theta)                                                                                                                                                                                                                                                                                                                                 | Eif3a    | Eif3s10 EIF3A_RAT | 0,226262266  | 0,09448745 | 2,3946278  | 0,02013728 | 0,04066643 |
| CON_007041 | Tumor protein 054 (Tumor protein 052-like 2)                                                                                                                                                                                                                                                                                                                                                                                                                       | Tpd5212  | TPD54_RAT         | -0,333024088 | 0,10616731 | -3,1367856 | 0,02015003 | 0,04066643 |
| Q9JJW3     | Serine/threonine-protein phosphatase 2A 55 kDa regulatory subunit B alpha isoform (PP2A subunit B isoform B55-alpha) (PP2A subunit B isoform BRA) (PP2A subunit B isoform PR55-alpha) (PP2A subunit B isoform R2-alpha) (PP2A subunit B isoform alpha)                                                                                                                                                                                                             | Ppp2r2a  | 2ABA_RAT          | -0,465369333 | 0,19741279 | -2,3573414 | 0,02022446 | 0,04075964 |
| Q9EPC6     | 40S ribosomal protein 512                                                                                                                                                                                                                                                                                                                                                                                                                                          | Rps12    | RS12_RAT          | -0,291389598 | 0,07825379 | -3,7236484 | 0,0204095  | 0,04107518 |
| Q6IRE4     | Myelin basic protein (MBP)                                                                                                                                                                                                                                                                                                                                                                                                                                         | Mbp      | MBP_RAT           | -0,547870555 | 0,21514627 | -2,5465027 | 0,02155511 | 0,04332036 |
| P16970     | Isochorismatase domain-containing protein 1 (Down-regulated in nephrectomized rat kidney protein 1) (DR-NR1)                                                                                                                                                                                                                                                                                                                                                       | Isoc1    | ISOC1_RAT         | -0,178275262 | 0,05440289 | -3,2769445 | 0,02202877 | 0,04414932 |
| QOVGK4     |                                                                                                                                                                                                                                                                                                                                                                                                                                                                    |          |                   | -0,395887535 | 0,17007311 | -2,3277491 | 0,02202552 | 0,04414932 |
| Q6P9T8     |                                                                                                                                                                                                                                                                                                                                                                                                                                                                    |          |                   | -0,243750764 | 0,10347303 | -2,3556937 | 0,02229419 | 0,0446193  |
| Q99ML5     |                                                                                                                                                                                                                                                                                                                                                                                                                                                                    |          |                   | -0,19616684  | 0,0840023  | -2,3352556 | 0,02267754 | 0,04532367 |
| Q5EB77     |                                                                                                                                                                                                                                                                                                                                                                                                                                                                    |          |                   | 0,22432532   | 0,08765851 | 2,55908201 | 0,02271365 | 0,04533305 |
| P97686-3   |                                                                                                                                                                                                                                                                                                                                                                                                                                                                    |          |                   | 0,30306513   | 0,08418058 | 3,60017881 | 0,02275452 | 0,04535189 |
| Q5XIS7     |                                                                                                                                                                                                                                                                                                                                                                                                                                                                    |          |                   | -0,497404945 | 0,21385536 | -2,3258942 | 0,02310613 | 0,04598917 |
| P61765-2   |                                                                                                                                                                                                                                                                                                                                                                                                                                                                    |          |                   | 0,192801638  | 0,07690648 | 2,50696231 | 0,02334481 | 0,04640023 |
| Q3KRE8     |                                                                                                                                                                                                                                                                                                                                                                                                                                                                    |          |                   | -0,414841694 | 0,17827435 | -2,3269847 | 0,0236078  | 0,04685839 |
| Q1JU68     |                                                                                                                                                                                                                                                                                                                                                                                                                                                                    |          |                   | -0,272301233 | 0,11929886 | -2,2825133 | 0,0238647  | 0,04730324 |
| Q6PCT3     |                                                                                                                                                                                                                                                                                                                                                                                                                                                                    |          |                   | -0,210861846 | 0,08931768 | -2,3608074 | 0,02449309 | 0,0484822  |
| P36876     |                                                                                                                                                                                                                                                                                                                                                                                                                                                                    |          |                   | 0,177700879  | 0,07797156 | 2,2790473  | 0,02457669 | 0,04858104 |
| P63324     |                                                                                                                                                                                                                                                                                                                                                                                                                                                                    |          |                   | 0,843074733  | 0,30535253 | 2,76098824 | 0,02463714 | 0,04863392 |
| P02688-5   |                                                                                                                                                                                                                                                                                                                                                                                                                                                                    |          |                   | -0,334387421 | 0,1458994  | -2,291904  | 0,02496726 | 0,04921825 |
| Q6IR3      |                                                                                                                                                                                                                                                                                                                                                                                                                                                                    |          |                   |              |            |            |            |            |

**Supplementary Table S3: Signatures for GRP78-promoted neuroprotection**

| Entry            | Protein names                                                                                                                                                                                                                                                                                                                                                                                          | Gene names          | Entry name |
|------------------|--------------------------------------------------------------------------------------------------------------------------------------------------------------------------------------------------------------------------------------------------------------------------------------------------------------------------------------------------------------------------------------------------------|---------------------|------------|
| A8WCF8<br>BOBNFI | Tumor protein p63-regulated gene 1-like protein (Mossy fiber terminal-associated vertebrate-specific presynaptic protein)                                                                                                                                                                                                                                                                              | Tprgll Mover        | TPRGL_RAT  |
|                  | Septin-8                                                                                                                                                                                                                                                                                                                                                                                               | Sept8               | SEPT8_RAT  |
| BOK020           | CDGSH iron-sulfur domain-containing protein 1 (MitoNEET)                                                                                                                                                                                                                                                                                                                                               | Cisd1               | CISDI_RAT  |
| B1H267           | Sorting nexin-5                                                                                                                                                                                                                                                                                                                                                                                        | Snx5                | SNX5_RAT   |
| B2RYG6           | Ubiquitin thioesterase OTUB1 (EC 3.4.19.12)                                                                                                                                                                                                                                                                                                                                                            | Otubl               | OTUB1_RAT  |
|                  | (Deubiquitinating enzyme OTUB1) (OTU domain-containing ubiquitin aldehyde-binding protein 1) (Otubain-1) (Ubiquitin-specific-processing protease OTUB1)                                                                                                                                                                                                                                                |                     |            |
| B2RYW9           | Fumarylacetoacetate hydrolase domain-containing protein 2 (EC 3.-.-.-)                                                                                                                                                                                                                                                                                                                                 | Fahd2 Fahd2a        | FAHD2_RAT  |
| B4F7AI           | Complex III assembly factor LYRM7 (LYR motif-containing protein 7)                                                                                                                                                                                                                                                                                                                                     | Lyrm7 MZMIL         | LYRM7_RAT  |
| D3ZVR7           | Prostamide/prostaglandin F synthase (Prostamide/PG F synthase) (Prostamide/PGF synthase) (EC 1.11.1.20)                                                                                                                                                                                                                                                                                                | Fam213b             | PGFS_RAT   |
| F1M386<br>008730 | Rap guanine nucleotide exchange factor 2 (Cyclic nucleotide ras GEF) (CNrasGEF) (Neural RAP guanine nucleotide exchange protein) (nRap GEP) (PDZ domain-containing guanine nucleotide exchange factor 1) (PDZ-GEF1) (RA-GEF-1) (Ras/Rapl-associating GEF-1)                                                                                                                                            | Rapgef2 Pdzgef1     | RPGF2_RAT  |
|                  | Glycogenin-1 (GN-1) (GNI) (EC 2.4.1.186)                                                                                                                                                                                                                                                                                                                                                               | Gygl Gyg            | GLYG_RAT   |
| 035112           | CD166 antigen (Activated leukocyte cell adhesion molecule) (HB2) (KG-CAM) (Protein MEMO) (SB-10 antigen) (CD antigen CD166)                                                                                                                                                                                                                                                                            | Alcam               | CD166_RAT  |
|                  | Stress-induced-phosphoprotein 1 (STII) (Hsc70/Hsp90-organizing protein) (Hop)                                                                                                                                                                                                                                                                                                                          |                     | STIPI_RAT  |
| 035814           | DnaJ homolog subfamily A member 2 (RDJ2)                                                                                                                                                                                                                                                                                                                                                               | Stipl Hop           | DNJA2_RAT  |
| 035824           | Branched-chain-amino-acid aminotransferase, mitochondrial (BCAT(m)) (EC 2.6.1.42)                                                                                                                                                                                                                                                                                                                      | Dnaja2              | BCAT2_RAT  |
| 035854           | Endophilin-A2 (Endophilin-2) (SH3 domain protein 2B) (SH3 domain-containing GRB2-like protein 1) (SH3p8)                                                                                                                                                                                                                                                                                               | Bcat2 Bcatm Eca40   | SH3GI_RAT  |
| 035964           | 3-hydroxyacyl-CoA dehydrogenase type-2 (EC 1.1.1.35) (17-beta-hydroxysteroid dehydrogenase 10) (17-beta-HSD 10) (EC 1.1.1.51) (3-hydroxy-2-methylbutyryl-CoA dehydrogenase) (EC 1.1.1.178) (3-hydroxyacyl-CoA dehydrogenase type II) (Endoplasmic reticulum-associated amyloid beta-peptide-binding protein) (Mitochondrial ribonuclease P protein 2) (Mitochondrial RNase P protein 2) (Type II HADH) | Sh3gll Sh3p8        | HCD2_RAT   |
| 070351           | Galectin-3-binding protein (Cyp-C-associated protein) (CyCAP) (Lectin galactoside-binding soluble 3-binding protein) (Mac-2-binding protein) (MAC2BP) (Mac-2 BP) (Protein 90K)                                                                                                                                                                                                                         | Hsd17b10 Erab Hadh2 | LG3BP_RAT  |
| 070513           | Acyl-coenzyme A thioesterase 1 (Acyl-CoA thioesterase 1) (EC 3.1.2.2) (CTE-I) (Inducible cytosolic acyl-coenzyme A thioester hydrolase) (LACH2) (ACH2) (Long chain acyl-CoA thioester hydrolase) (Long chain acyl-CoA hydrolase)                                                                                                                                                                       | Lgals3bp            | ACOTI_RAT  |
| 088267           | Tyrosine-protein phosphatase non-receptor type 23 (EC 3.1.3.48) (His domain-containing protein tyrosine phosphatase) (HD-PTP) (Protein tyrosine phosphatase TD14) (PTP-TD14) (Fragment)                                                                                                                                                                                                                | Acotl Ctel          | PTN23_RAT  |
| 088902           | Cytochrome c oxidase subunit 2 (Cytochrome c oxidase polypeptide II)                                                                                                                                                                                                                                                                                                                                   | Ptpn23              | COX2_RAT   |
| P00406           | T-kininogen 1 (Alpha-1-MAP) (Major acute phase protein) (T-kininogen I) (Thiostatin) [Cleaved into : T-kininogen 1 heavy chain (T-kininogen I heavy chain); T-kinin; T-kininogen 1 light chain (T-kininogen I light chain)]                                                                                                                                                                            | Mtco2 Coii mt-Co2   | KNTI_RAT   |
| P01048           | Ferritin light chain 1 (Ferritin L subunit 1)                                                                                                                                                                                                                                                                                                                                                          | Mapl                | FRILI_RAT  |
| P02793           | L-lactate dehydrogenase A chain (LDH-A) (EC 1.1.1.27) (LOH muscle subunit) (LDH-M)                                                                                                                                                                                                                                                                                                                     | Ftl Ftl             | LDHA_RAT   |
| P04642           | Tropomyosin alpha-1 chain (Alpha-tropomyosin) (Tropomyosin-1)                                                                                                                                                                                                                                                                                                                                          | Ldha Ldh-1 Ldhl     | TPMI_RAT   |
| P04692           | Glutathione S-transferase P (EC 2.5.1.18) (Chain 7) (GST 7-7) (GST class-pi)                                                                                                                                                                                                                                                                                                                           | Tpml Alpha-tm Tpma  | GSTPI_RAT  |
| P04906           | 60S ribosomal protein L7                                                                                                                                                                                                                                                                                                                                                                               | Gstpl               | RL7_RAT    |
| P05426           | Protein kinase C alpha type (PKC-A) (PKC-alpha) (EC 2.7.11.13)                                                                                                                                                                                                                                                                                                                                         | Rpl7                | KPCA_RAT   |
| P05696           | Alpha-2-macroglobulin (Alpha-2-M)                                                                                                                                                                                                                                                                                                                                                                      | Prkca Pkca          | A2MG_RAT   |
| P06238           |                                                                                                                                                                                                                                                                                                                                                                                                        | A2m A2ml            |            |

|          |                                                                                                                                                                                                                                                                  |                            |           |
|----------|------------------------------------------------------------------------------------------------------------------------------------------------------------------------------------------------------------------------------------------------------------------|----------------------------|-----------|
|          | Sodium/potassium-transporting ATPase subunit alpha-2 (Na(+)/K(+) ATPase alpha-2 subunit) (EC 3.6.3.9) (Na(+)/K(+) ATPase alpha(+) subunit) (Sodium pump subunit alpha-2)                                                                                         |                            | AT1A2_RAT |
| P06686   | Dolichyl-diphosphooligosaccharide--protein glycosyltransferase subunit 1 (EC 2.4.99.18) (Dolichyl-diphosphooligosaccharide--protein glycosyltransferase 67 kDa subunit) (Ribophorin I) (RPN-1) (Ribophorin-1)                                                    | Atp1a2                     | RPN1_RAT  |
| P07153   | Sodium/potassium-transporting ATPase subunit beta-1 (Sodium/potassium-dependent ATPase subunit beta-1)                                                                                                                                                           | Rpnl                       | AT1B1_RAT |
| P07340   | Superoxide dismutase [Mn], mitochondrial (EC 1.1.5.1.1)                                                                                                                                                                                                          | Atp1b1                     | SODM_RAT  |
| P07895   | Glutathione 5-transferase Yb-3 (EC 2.5.1.18) (Chain 4) (GST Yb3) (GST class-mu 3)                                                                                                                                                                                | Sod2                       | GSTM4_RAT |
| P08009   | Microsomal glutathione 5-transferase 1 (Microsomal GST-1) (EC 2.5.1.18) (Microsomal GST-1)                                                                                                                                                                       | Gstm3                      | MGST1_RAT |
| P08011   | Clathrin light chain A (Lea)                                                                                                                                                                                                                                     | Mgstl Gst12                |           |
| P08081-2 | Clathrin light chain B (Lcb)                                                                                                                                                                                                                                     | Clta                       | CLCA_RAT  |
| P08082   | T-kininogen 2 (Alpha-1-MAP) (Major acute phase protein) (T-kininogen II) (Thiostatin) [Cleaved into: T-kininogen 2 heavy chain (T-kininogen II heavy chain); T-kinin; T-kininogen 2 light chain (T-kininogen II light chain)]                                    | Cltb                       | CLCB_RAT  |
| P08932   | 1-phosphatidylinositol 4,5-bisphosphate phosphodiesterase gamma-1 (EC 3.1.4.11) (Phosphoinositide phospholipase C-gamma-1) (Phospholipase C-gamma-1) (PLC-gamma-1)                                                                                               |                            | KNT2_RAT  |
| P10686   | Glutamate dehydrogenase 1, mitochondrial (GDH 1) (EC 1.4.1.3) (Memory-related gene 2 protein) (MRG-2)                                                                                                                                                            | Plcgl                      | PLCG1_RAT |
| P10860   | Cytochrome c oxidase subunit 4 isoform 1, mitochondrial (Cytochrome c oxidase polypeptide IV) (Cytochrome c oxidase subunit IV isoform 1) (COX IV-1)                                                                                                             | Gludl Glud                 | DHE3_RAT  |
| P10888   | ATP synthase protein 8 (A6L) (Chargerin II) (F-ATPase subunit 8)                                                                                                                                                                                                 | Cox4i1 Cox4 Cox4a          | COX41_RAT |
| P11608   | Pyruvate kinase PKM (EC 2.7.1.40) (Pyruvate kinase muscle isozyme)                                                                                                                                                                                               | Mt-atp8 Atp8 Atpase8 Mtap8 | ATP8_RAT  |
| P11980-2 | 605 ribosomal protein L18                                                                                                                                                                                                                                        |                            | KPYM_RAT  |
| P12001   | Isovaleryl-CoA dehydrogenase, mitochondrial (IVD) (EC 1.3.8.4)                                                                                                                                                                                                   | Pkm Pkm2 Pykm              |           |
| P12007   | 2',3'-cyclic-nucleotide 3'-phosphodiesterase (CNP) (CNPase) (EC 3.1.4.37)                                                                                                                                                                                        | Rpl18                      | RL18_RAT  |
| P13233   | Nucleolin (Protein C23)                                                                                                                                                                                                                                          | Ivd                        | IVD_RAT   |
| P13383   | Sodium/potassium-transporting ATPase subunit beta-2 (Sodium/potassium-dependent ATPase subunit beta-2)                                                                                                                                                           | Cnp Cnpl                   | CN37_RAT  |
| P13638   | Enoyl-CoA hydratase, mitochondrial (EC 4.2.1.17) (Enoyl-CoA hydratase 1) (Short-chain enoyl-CoA hydratase) (SCEH)                                                                                                                                                | Ncl Nuc                    | NUCL_RAT  |
| P14604   | Cystatin-C (Cystatin-3)                                                                                                                                                                                                                                          | Atp1b2                     | AT1B2_RAT |
| P14841   | Steryl-sulfatase (EC 3.1.6.2) (Arylsulfatase C) (ASC) (Steroid sulfatase) (Steryl-sulfate sulfohydrolase)                                                                                                                                                        |                            | ECHM_RAT  |
| P15589   | Long-chain specific acyl-CoA dehydrogenase, mitochondrial (LCAD) (EC 1.3.8.8)                                                                                                                                                                                    | Echsl                      |           |
| P15650   | ATP synthase subunit alpha, mitochondrial                                                                                                                                                                                                                        | Cst3                       | CYTC_RAT  |
| P15999   | Phosphate carrier protein, mitochondrial (Phosphate transport protein) (PTP) (Solute carrier family 25 member 3)                                                                                                                                                 | Sts                        | STS_RAT   |
| P16036   | 405 ribosomal protein 519                                                                                                                                                                                                                                        | Acadl                      | ACADL_RAT |
| P17074   | 605 ribosomal protein L9                                                                                                                                                                                                                                         | Atp5a1                     | ATPA_RAT  |
| P17077   | Alpha-1-antitrypsin (Alpha-1-antitrypsin) (Alpha-1-proteinase inhibitor) (Serpina1)                                                                                                                                                                              | Slc25a3 Phc                | MPCP_RAT  |
| P17475   | Glutamate decarboxylase 1 (EC 4.1.1.15) (67 kDa glutamic acid decarboxylase) (GAD-67) (Glutamate decarboxylase 67 kDa isoform)                                                                                                                                   | Rps19                      | RS19_RAT  |
| P18088   | NADH dehydrogenase [ubiquinone] flavoprotein 2, mitochondrial (EC 1.6.5.3) (EC 1.6.99.3) (NADH-ubiquinone oxidoreductase 24 kDa subunit)                                                                                                                         | Rpl9                       | RL9_RAT   |
| P19234   | Neurofilament light polypeptide (NF-L) (68 kDa neurofilament protein) (Neurofilament triplet L protein)                                                                                                                                                          | Serpinal                   | A1AT_RAT  |
| P19527   | 605 acidic ribosomal protein PO (60S ribosomal protein L10E)                                                                                                                                                                                                     | Gadl Gad67                 | DCE1_RAT  |
| P19945   | Neurosecretory protein VGF (VGF8a protein) [Cleaved into : VGF(24-63); VGF(180-194) ; VGF(375-407); Neuroendocrine regulatory peptide-1 (N ERP-1); Neuroendocrine regulatory peptide-2 (N ERP-2); TLQP-11; TLQP-21; TLQP-30; TLQP-62; HFHH-10; AQEE-30; LQEQ-19] | Ndufv2                     | NDUV2_RAT |
| P20156   |                                                                                                                                                                                                                                                                  | Nefl Nf68 Nfl              | NFL_RAT   |
|          |                                                                                                                                                                                                                                                                  | Rplp0 Arbp                 | RLA0_RAT  |
|          |                                                                                                                                                                                                                                                                  | Vgf                        | VGf_RAT   |

|        |                                                                                                                                                                                                                                                                                                                                                                                                           |                       |                 |
|--------|-----------------------------------------------------------------------------------------------------------------------------------------------------------------------------------------------------------------------------------------------------------------------------------------------------------------------------------------------------------------------------------------------------------|-----------------------|-----------------|
|        | Cytochrome b-cl complex subunit Rieske, mitochondrial (EC 1.10 .2.2) (Complex III subunit 5) (Cytochrome b-cl complex subunit 5) (Liver regeneration-related protein LRRGT00195) (Rieske iron-sulfur protein) (RISP) (Ubiquinol-cytochrome c reductase iron-sulfur subunit) [Cleaved into : Cytochrome b-cl complex subunit 11 (Complex III subunit IX) (Ubiquinol-cytochrome c reductase 8 kDa protein)] |                       | UCRI_RAT        |
| P20788 | Amine oxidase [flavin-containing] <b>A</b> (EC 1.4.3.4)                                                                                                                                                                                                                                                                                                                                                   | Uqcrfsl               |                 |
| P21396 | (Monoamine oxidase type A) (MAO-A)                                                                                                                                                                                                                                                                                                                                                                        | Maoa                  | AOFA_RAT        |
| P21707 | Synaptotagmin-1 (Synaptotagmin I) (Sytl) (p65)                                                                                                                                                                                                                                                                                                                                                            | Sytl                  | SYTI_RAT        |
|        | Cathepsin D (EC 3.4.23.5) [Cleaved into: Cathepsin D 12 kDa light chain; Cathepsin D 9 kDa light chain ; Cathepsin D 34 kDa heavy chain ; Cathepsin D 30 kDa heavy chain]                                                                                                                                                                                                                                 |                       | CATD_RAT        |
| P24268 | Glutathione S-transferase kappa 1 (EC 2.5.1.18) (GST 13-13) (GST class-kappa) (GSTKl-1) (rGSTKl) (Glutathione S-transferase subunit 13)                                                                                                                                                                                                                                                                   | Ctsd                  | GSTKI_RAT       |
| P24473 | Creatine kinase U-type , mitochondrial (EC 2.7.3.2) (Acidic-type mitochondrial creatine kinase) (Mia-CK) (Ubiquitous mitochondrial creatine kinase) (U-MtCK)                                                                                                                                                                                                                                              | Gstk1                 | KCRU_RAT        |
| P25809 | C-1-tetrahydrofolate synthase, cytoplasmic (Cl-THF synthase) [Cleaved into: C-1-tetrahydrofolate synthase , cytoplasmic, N-terminally processed] [Includes : Methylenetetrahydrofolate dehydrogenase (EC 1.5.1.5); Methenyltetrahydrofolate cyclohydrolase (EC 3.5.4.9); Formyltetrahydrofolate synthetase (EC 6.3.4.3)]                                                                                  | Ckmtl Ckmt            | CITC_RAT        |
| P27653 | Neuroendocrine protein 7B2 (Secretogranin V) (Secretogranin-5) (Secretory granule endocrine protein I) [Cleaved into : N-terminal peptide; (-terminal peptide]                                                                                                                                                                                                                                            | Mthfdl Mthfd          | 7B2_RAT         |
| P27682 | Sorbitol dehydrogenase (EC 1.1.1.14) (L-iditol 2-dehydrogenase)                                                                                                                                                                                                                                                                                                                                           | ScgS Sgnel            | DHSO_RAT        |
| P27867 | Proteasome subunit beta type-8 (EC 3.4.25.1) (Macropain subunit C13) (Multicatalytic endopeptidase complex subunit C13) (Proteasome component C13) (Proteasome subunit beta-Si)                                                                                                                                                                                                                           | Sord Sdhl             | PSB8_RAT        |
| P28064 | 40S ribosomal protein S9                                                                                                                                                                                                                                                                                                                                                                                  | Psmb8                 | RS9_RAT         |
| P29314 |                                                                                                                                                                                                                                                                                                                                                                                                           | Rps9                  | DLG4_RAT        |
|        | Disks large homolog 4 (Postsynaptic density protein 95) (PSD-95) (Synapse-associated protein 90) (SAP-90) (SAP90)                                                                                                                                                                                                                                                                                         |                       |                 |
| P31016 |                                                                                                                                                                                                                                                                                                                                                                                                           | Dlg4 Dlgh4 Psd95      |                 |
| P31721 | Complement Clq subcomponent subunit B                                                                                                                                                                                                                                                                                                                                                                     | Clqb                  | CIQB_RAT        |
|        | Cytochrome c oxidase subunit 7A2, mitochondrial (Cytochrome c oxidase subunit VIIa-iiiver/heart)                                                                                                                                                                                                                                                                                                          |                       | CX7A2_RAT       |
| P35171 | (Cytochrome c oxidase subunit VIIa-L)                                                                                                                                                                                                                                                                                                                                                                     | Co x7a2 Cox7a3 Cox7al |                 |
| P35427 | 60S ribosomal protein L13a                                                                                                                                                                                                                                                                                                                                                                                | Rpl13a                | RL13A_RAT       |
|        | ATP synthase subunit gamma, mitochondrial (F-ATPase gamma subunit)                                                                                                                                                                                                                                                                                                                                        |                       | ATPG_RAT        |
| P35435 | Calnexin                                                                                                                                                                                                                                                                                                                                                                                                  | AtpScl AtpSc          |                 |
| P35565 | Proteasome subunit beta type-2 (EC 3.4.25.1) (Macropain subunit C7-I) (Multicatalytic endopeptidase complex subunit C7-I) (Proteasome component C7-I)                                                                                                                                                                                                                                                     | Can x                 | CALX_RAT        |
| P40307 | 60S ribosomal protein L13                                                                                                                                                                                                                                                                                                                                                                                 |                       | PSB2_RAT        |
| P41123 | Isocitrate dehydrogenase [ <b>NAD</b> ] subunit gamma 1, mitochondrial (EC 1.1.1.41) (Isocitri c dehydrogenase subunit gamma) (NAD(+)-specific ICDH subunit gamma)                                                                                                                                                                                                                                        | Psmb2                 | RL13_RAT        |
| P41565 | Matrin-3 (Nuclear scaffold protein p130/MAT3)                                                                                                                                                                                                                                                                                                                                                             | Rpl13                 | IDHGI_RAT       |
| P43244 | Cysteine and glycine-rich protein 1 (Cysteine-rich protein 1) (CRP) (CRP1)                                                                                                                                                                                                                                                                                                                                | ldh3g                 |                 |
| P47875 | Triosephosphate isomerase (TIM) (EC 5.3.1.1) (Triose-phosphate isomerase)                                                                                                                                                                                                                                                                                                                                 | Matr3                 | MATR3_RAT       |
| P48500 | Glutamate--cysteine ligase regulatory subunit (GCS light chain) (Gamma-ECS regulatory subunit) (Gamma-glutamylcysteine synthetase regulatory subunit) (Glutamate--cysteine ligase modifier subunit)                                                                                                                                                                                                       | Csrpl Csrp            | CSRPI_RAT       |
|        | Hsc70-interacting protein (Hip) (Protein FAM10A1) (Protein ST13 homolog)                                                                                                                                                                                                                                                                                                                                  |                       | TPIS_RAT        |
| P50503 | Ras GTPase-activating protein 1 (GAP) (GTPase-activating protein) (RasGAP) (Ras p21 protein activator) (p120GAP)                                                                                                                                                                                                                                                                                          | Tpil                  | GSH0_RAT        |
| P50904 | Pyruvate carboxylase, mitochondrial (EC 6.4.1.1) (Pyruvic carboxylase) (PCB)                                                                                                                                                                                                                                                                                                                              | Gclm Gclcr            | F10A1_RAT       |
| P52873 | Branched-chain-amino-acid aminotransferase , cytosolic (BCAT(c)) (EC 2.6.1.42)                                                                                                                                                                                                                                                                                                                            | St13 Fam10a1 Hip      | RASAI_RAT       |
| P54690 |                                                                                                                                                                                                                                                                                                                                                                                                           | Rasal Rasa            | PYC_RAT         |
|        | Alpha-soluble NSF attachment protein (SNAP-alpha) (N-ethylmaleimide-sensitive factor attachment protein alpha)                                                                                                                                                                                                                                                                                            | Pc                    | BCATI_RAT       |
| P54921 |                                                                                                                                                                                                                                                                                                                                                                                                           | Bcatl                 | <b>SNAA_RAT</b> |
|        |                                                                                                                                                                                                                                                                                                                                                                                                           | Napa Snap Snapa       |                 |

|        |                                                                                                                                                                                                                                                                                                                                                                                     |                            |           |
|--------|-------------------------------------------------------------------------------------------------------------------------------------------------------------------------------------------------------------------------------------------------------------------------------------------------------------------------------------------------------------------------------------|----------------------------|-----------|
|        | Fatty acid-binding protein, brain (Brain lipid-binding protein) (BLBP) (Brain-type fatty acid-binding protein) (B-FABP) (Fatty acid-binding protein 7)                                                                                                                                                                                                                              | Fabp7 Blbp                 | FABP7_RAT |
| P55051 | Neurocan core protein (245 kDa early postnatal core glycoprotein) (Chondroitin sulfate proteoglycan 3) [Cleaved into : 150 kDa adult core glycoprotein]                                                                                                                                                                                                                             |                            | NCAN_RAT  |
| P55067 | Secretory carrier-associated membrane protein 1 (Secretory carrier membrane protein 1) (SCAMP 37)                                                                                                                                                                                                                                                                                   | Ncan Cspg3                 | SCAM1_RAT |
| P56603 | Guanine nucleotide-binding protein G(o) subunit alpha                                                                                                                                                                                                                                                                                                                               | Scamp1 Scamp               | GNAO_RAT  |
| P59215 | Myelin proteolipid protein (PLP) (Lipophilin)                                                                                                                                                                                                                                                                                                                                       | Gnaol Gna0 Gnao            | MYPR_RAT  |
| P60203 | Proteasome subunit alpha type-6 (EC 3.4.25.1) (Macropain iota chain) (Multicatalytic endopeptidase complex iota chain) (Proteasome iota chain)                                                                                                                                                                                                                                      | Plpl Pip                   | PSA6_RAT  |
| P60901 | 60S ribosomal protein L15                                                                                                                                                                                                                                                                                                                                                           | Psma6                      |           |
| P61314 | Dolichyl-diphosphooligosaccharide--protein glycosyltransferase subunit DAD1 (Oligosaccharyl transferase subunit DAD1) (EC 2.4.99.18) (Defender against cell death 1) (DAD-1)                                                                                                                                                                                                        | Rpl15                      | RL15_RAT  |
| P61805 | Mitochondrial import inner membrane translocase subunit Tim13                                                                                                                                                                                                                                                                                                                       | Dadl                       | DAD1_RAT  |
| P62076 | Neuronal calcium sensor 1 (NCS-1) (Frequenin homolog) (Frequenin-like protein) (Frequenin-like ubiquitous protein)                                                                                                                                                                                                                                                                  | Timm13 Tim13a Timm13a      | TIM13_RAT |
| P62168 | 40S ribosomal protein 58                                                                                                                                                                                                                                                                                                                                                            |                            | NCS1_RAT  |
| P62243 | 40S ribosomal protein 529                                                                                                                                                                                                                                                                                                                                                           | Ncs1 Flup Freq             |           |
| P62275 | Elongation factor 1-alpha 1 (EF-1-alpha-1) (Elongation factor Tu) (EF-Tu) (Eukaryotic elongation factor 1 A-1) (eEF1A-1)                                                                                                                                                                                                                                                            | Rps8                       | RS8_RAT   |
| P62630 | 60S ribosomal protein L23a                                                                                                                                                                                                                                                                                                                                                          | Rps29                      | RS29_RAT  |
| P62752 | Myotrophin (Granule cell differentiation protein) (Protein V-1)                                                                                                                                                                                                                                                                                                                     |                            | EF1A1_RAT |
| P62775 | Ras-related protein Rab -3C                                                                                                                                                                                                                                                                                                                                                         | Eef1a1 Eefla               |           |
| P62824 | 40S ribosomal protein 526                                                                                                                                                                                                                                                                                                                                                           | Rpl23a                     | RL23A_RAT |
| P62856 | Transcription elongation factor B polypeptide 2 (Elongin 18 kDa subunit) (Elongin-B) (EloB) (RNA polymerase II transcription factor Slii subunit B) (Slii p18)                                                                                                                                                                                                                      | Mtpn Gcdp                  | MTPN_RAT  |
| P62907 | 60S ribosomal protein L10a                                                                                                                                                                                                                                                                                                                                                          | Rab3c                      | RAB3C_RAT |
| P62909 | 40S ribosomal protein 53                                                                                                                                                                                                                                                                                                                                                            | Rps26                      | RS26_RAT  |
| P62912 | 60S ribosomal protein L32                                                                                                                                                                                                                                                                                                                                                           |                            | ELOB_RAT  |
| P62919 | Platelet-activating factor acetylhydrolase IB subunit alpha (Lissencephaly-1 protein) (LIS-1) (PAF acetylhydrolase 45 kDa subunit) (PAF-AH 45 kDa subunit) (PAF-AH alpha) (PFAH alpha)                                                                                                                                                                                              | Tceb2                      |           |
| P63004 | Casein kinase II subunit beta (CK II beta) (Phosvitin)                                                                                                                                                                                                                                                                                                                              | Rpl10a                     | RL10A_RAT |
| P67874 | Voltage-dependent anion-selective channel protein 2 (VDAC-2) (B36-VDAC) (Outer mitochondrial membrane protein porin 2)                                                                                                                                                                                                                                                              | Rps3                       | RS3_RAT   |
| P81155 | Elongation factor Tu, mitochondrial                                                                                                                                                                                                                                                                                                                                                 | Rpl32                      | RL32_RAT  |
| P85834 | Fascin                                                                                                                                                                                                                                                                                                                                                                              | Rpl8                       | RL8_RAT   |
| P85845 | Beta-soluble NSF attachment protein (SNAP-beta) (N-ethylmaleimide-sensitive factor attachment protein beta)                                                                                                                                                                                                                                                                         |                            | LIS1_RAT  |
| P85969 | Mitochondrial 2-oxoglutarate/malate carrier protein (OGCP) (Solute carrier family 25 member 11)                                                                                                                                                                                                                                                                                     | Pafah1b1 Lis-1 Lisl Pafaha |           |
| P97700 | Long-chain fatty acid transport protein 1 (FATP-1) (Fatty acid transport protein 1) (EC 6.2.1.-) (Solute carrier family 27 member 1)                                                                                                                                                                                                                                                | Csnk2b Ck2n                | CSK2B_RAT |
| P97849 | Peroxisomal multifunctional enzyme type 2 (MFE-2) (17-beta-hydroxysteroid dehydrogenase 4) (17-beta-HSD 4) (D-bifunctional protein) (DBP) (Multifunctional protein 2) (MPF-2) [Cleaved into: (3R)-hydroxyacyl-CoA dehydrogenase (EC 1.1.1.n1 2); Enoyl-CoA hydratase 2 (EC 4.2.1.107) (EC 4.2.1.119) (3-alpha, 7-alpha, 12-alpha-trihydroxy-5-beta-cholest-24-enoyl-CoA hydratase)] | Vdac2                      | VDAC2_RAT |
| P97852 | Cyclin-G-associated kinase (EC 2.7.11.1)                                                                                                                                                                                                                                                                                                                                            | Tufm                       | EFTU_RAT  |
| P97874 | NAD kinase 2, mitochondrial (EC 2.7.1.23) (Mitochondrial NAD kinase) (NAD kinase domain-containing protein 1, mitochondrial)                                                                                                                                                                                                                                                        | Fscnl                      | FSCN1_RAT |
| Q1HCL7 | Alpha-ketoglutarate-dependent dioxygenase FTO (EC 1.14.11.-) (Fat mass and obesity-associated protein)                                                                                                                                                                                                                                                                              | Napb Snapb                 | SNAB_RAT  |
| Q2A121 | Kinesin-1 heavy chain (Conventional kinesin heavy chain)                                                                                                                                                                                                                                                                                                                            | Slc25a11 Slc20a4           | M2OM_RAT  |
| Q2PQA9 | (Ubiquitous kinesin heavy chain) (UKHC)                                                                                                                                                                                                                                                                                                                                             | Slc27a1 Fatp Fatpl         | S27A1_RAT |
| Q3MIE4 | Synaptic vesicle membrane protein VAT-1 homolog (EC 1.-.-) (Mitofusin-binding protein) (Protein MIB)                                                                                                                                                                                                                                                                                |                            | DHB4_RAT  |
|        |                                                                                                                                                                                                                                                                                                                                                                                     | Hsd17b4 Edh17b4            |           |
|        |                                                                                                                                                                                                                                                                                                                                                                                     | Gak                        | GAK_RAT   |
|        |                                                                                                                                                                                                                                                                                                                                                                                     |                            | NAKD2_RAT |
|        |                                                                                                                                                                                                                                                                                                                                                                                     | Nadk2 Mnadk Nadkdl         |           |
|        |                                                                                                                                                                                                                                                                                                                                                                                     |                            | FTO_RAT   |
|        |                                                                                                                                                                                                                                                                                                                                                                                     | Fto                        |           |
|        |                                                                                                                                                                                                                                                                                                                                                                                     | Kif5b Khc                  | KINH_RAT  |
|        |                                                                                                                                                                                                                                                                                                                                                                                     |                            | VAT1_RAT  |
|        |                                                                                                                                                                                                                                                                                                                                                                                     | Vatl                       |           |

|        |                                                                                                                                                                                                                     |                     |           |
|--------|---------------------------------------------------------------------------------------------------------------------------------------------------------------------------------------------------------------------|---------------------|-----------|
| Q496Z0 | Elongator complex protein 2 (ELP2) (SHINC-2) (STAT3-interacting protein 1) (StlPI)                                                                                                                                  | Elp2 Statipl        | ELP2_RAT  |
| Q499N5 | Acyl-CoA synthetase family member 2, mitochondrial (EC 6.2.1.-)                                                                                                                                                     | Acsf2               | ACSF2_RAT |
| Q4FZT9 | 26S proteasome non-ATPase regulatory subunit 2                                                                                                                                                                      | Psmd2               | PSMD2_RAT |
| Q4G075 | Leukocyte elastase inhibitor A (Serine protease inhibitor EIA) (Serpina1)                                                                                                                                           | Serpina1            | ILEUA_RAT |
| Q4V7D2 | Protein rogdi homolog                                                                                                                                                                                               | Rogdi               | ROGDI_RAT |
| Q562C6 | Leucine zipper transcription factor-like protein 1                                                                                                                                                                  | Lztfl1              | LZTL1_RAT |
| Q566C7 | Diphosphoinositol polyphosphate phosphohydrolase 1 (DIPP-1) (EC 3.6.1.52) (Diadenosine 5',5'''-P1,P6-hexaphosphate hydrolase 1) (EC 3.6.1.-) (Nucleoside diphosphate-linked moiety X motif 3) (Nudix motif 3)       | Nudt3 Dipp Dippl    | NUDT3_RAT |
| Q5BJT7 | Coiled-coil domain-containing protein 93                                                                                                                                                                            | Ccdc93              | CCD93_RAT |
| Q5FVJ0 | Protein RUFY3 (Rap2-interacting protein x) (RIPx) (Single axon-regulated protein) (Singer)                                                                                                                          | Rufy3 Ripx          | RUFY3_RAT |
| Q5FVQ9 | Tubulin-specific chaperone E (Tubulin-folding cofactor E)                                                                                                                                                           | Tbce                | TBCE_RAT  |
| Q5FWT1 | Protein FAM98A                                                                                                                                                                                                      | Fam98a              | FA98A_RAT |
| Q510P2 | Glycine cleavage system H protein, mitochondrial (Lipoic acid-containing protein)                                                                                                                                   | Gcsh                | GCSH_RAT  |
| Q5PPL3 | Sterol-4-alpha-carboxylate 3-dehydrogenase, decarboxylating (EC 1.1.1.170)                                                                                                                                          | Nsdhl               | NSDHL_RAT |
| Q5PPN5 | Tubulin polymerization-promoting protein family member 3                                                                                                                                                            | Tppp3               | TPPP3_RAT |
| Q5PQN0 | Neurocalcin-delta                                                                                                                                                                                                   | Ncald               | NCALD_RAT |
| Q5SGEO | Leucine-rich PPR motif-containing protein, mitochondrial (130 kDa leucine-rich protein) (LRP 130) (Leucine rich protein 157) (rLRP157)                                                                              | Lrpprc Lrp157       | LPPRC_RAT |
| Q5U204 | Ragulator complex protein LAMTOR3 (Late endosomal/lysosomal adaptor and MAPK and MTOR activator 3) (Mitogen-activated protein kinase kinase 1-interacting protein 1)                                                | Lamtor3 Map2klip1   | LTOR3_RAT |
| Q5U2N3 | Membrane-associated phosphatidylinositol transfer protein 1 (Phosphatidylinositol transfer protein, membrane-associated 1) (PITPnm 1) (Pyk2 N-terminal domain-interacting receptor 2) (NIR-2)                       | Pitpnm1 Nir2 Pitpnm | PITMI_RAT |
| Q5XHZ0 | Heat shock protein 75 kDa, mitochondrial (HSP 75) (TNFR-associated protein 1) (Tumor necrosis factor type 1 receptor-associated protein) (TRAP-1)                                                                   | Trap1 Hsp75         | TRAP1_RAT |
| Q5XI73 | Rho GDP-dissociation inhibitor 1 (Rho GDI 1) (Rho-GDI alpha)                                                                                                                                                        | Arhgdia             | GDIR1_RAT |
| Q5XIF3 | NADH dehydrogenase [ubiquinone] iron-sulfur protein 4, mitochondrial (Complex 1-18 kDa) (CI-18 kDa) (NADH-ubiquinone oxidoreductase 18 kDa subunit)                                                                 | Ndufs4              | NDUS4_RAT |
| Q5XIF6 | Tubulin alpha-4A chain (Alpha-tubulin 4) (Tubulin alpha-4 chain)                                                                                                                                                    | Tuba4a Tuba4        | TBA4A_RAT |
| Q5XIM5 | Protein CDV3 homolog                                                                                                                                                                                                | Cdv3                | CDV3_RAT  |
| Q5XIN6 | LETMI and EF-hand domain-containing protein 1, mitochondrial (Leucine zipper-EF-hand-containing transmembrane protein 1)                                                                                            | Letmi               | LETMI_RAT |
| Q5XIT1 | Microtubule-associated protein RP/EB family member 3 (EB1 protein family member 3) (EBF3) (End-binding protein 3) (EB3) (RP3)                                                                                       | Mapre3              | MARE3_RAT |
| Q60587 | Trifunctional enzyme subunit beta, mitochondrial (TP-beta) [Includes : 3-ketoacyl-CoA thiolase (EC 2.3.1.16) (Acetyl-CoA acyltransferase) (Beta-ketothiolase)]                                                      | Hadhb               | ECHB_RAT  |
| Q62651 | Delta(3,5)-Delta(2,4)-dienoyl-CoA isomerase, mitochondrial (EC 5.3.3.-)                                                                                                                                             | Echl                | ECHI_RAT  |
| Q62688 | Inactive phospholipase C-like protein 1 (PLC-LI) (PRIPI) (Phospholipase C-related but catalytically inactive protein) (p130)                                                                                        | Pleil               | PLCLI_RAT |
| Q62703 | Reticulocalbin-2 (Calcium-binding protein ERC-55) (Taipoxin-associated calcium-binding protein 49) (TCBP-49)                                                                                                        | Rcn2 Erc55          | RCN2_RAT  |
| Q62785 | 28 kDa heat- and acid-stable phosphoprotein (PDGF-associated protein) (PAP) (PDGFA-associated protein 1) (PAPI)                                                                                                     | Pdap1 Haspp28       | HAP28_RAT |
| Q62812 | Myosin-9 (Cellular myosin heavy chain, type A) (Myosin heavy chain 9) (Myosin heavy chain, non-muscle IIa) (Non-muscle myosin heavy chain A) (NMMHC-A) (Non-muscle myosin heavy chain IIa) (NMMHC II-a) (NMMHC-IIA) | Myh9                | MYH9_RAT  |

|        |                                                                                                                                                                                                                                  |                           |           |
|--------|----------------------------------------------------------------------------------------------------------------------------------------------------------------------------------------------------------------------------------|---------------------------|-----------|
|        | Rho-associated protein kinase 2 (EC 2.7.11.1) (Rho-associated, coiled-coil-containing protein kinase 2) (Rho-associated, coiled-coil-containing protein kinase II) (ROCK-II) (RhoA-binding kinase 2) (p150 ROK-alpha) (ROKalpha) |                           | ROCK2_RAT |
| Q62868 | (p164 ROCK-2)                                                                                                                                                                                                                    | Rock2                     |           |
| Q62915 | Peripheral plasma membrane protein CASK (EC 2.7.11.1) (Calcium/calmodulin-dependent serine protein kinase)                                                                                                                       | Cask                      | CSKP_RAT  |
|        | Dihydropyrimidinase-related protein 4 (DRP-4) (Collapsin response mediator protein 3) (CRMP-3) (UNC33-like phosphoprotein 4) (ULIP-4) (Fragment)                                                                                 |                           | DPYL4_RAT |
| Q62951 | Diphosphomevalonate decarboxylase (EC 4.1.1.33) (Mevalonate (diphospho)decarboxylase) (MDDase)                                                                                                                                   | Dpysl4 Crmp3 Ulip4        | MVDI_RAT  |
| Q62967 | (Mevalonate pyrophosphate decarboxylase)                                                                                                                                                                                         | Mvd Mpd                   |           |
|        | Seel family domain-containing protein 1 (SLYI homolog) (Slyp) (Syntaxin-binding protein 1-like 2) (Vesicle transport-related protein Ra410)                                                                                      |                           | SCFDI_RAT |
| Q62991 |                                                                                                                                                                                                                                  | Scfdl Ra410 Slyl Stxbpll2 |           |
|        | Protein arginine N-methyltransferase 1 (EC 2.1.1.-) (Histone-arginine N-methyltransferase PRMT1) (EC 2.1.1.125)                                                                                                                  |                           | ANMI_RAT  |
| Q63009 |                                                                                                                                                                                                                                  | Prmtl Hrmtl12             |           |
|        | Receptor-type tyrosine-protein phosphatase-like N (R-PTP-N) (105 kDa islet cell antigen) (BEM-3) (Brain-enriched membrane-associated protein tyrosine phosphatase)                                                               |                           | PTPRN_RAT |
| Q63259 | (ICA105) (PTP <b>IA-2</b> ) (PTPLP)                                                                                                                                                                                              | Ptpn                      |           |
|        | 26S protease regulatory subunit 7 (26S proteasome <b>AAA</b> -ATPase subunit RPT1) (Proteasome 26S subunit ATPase 2) (Protein MSSI)                                                                                              |                           | PRS7_RAT  |
| Q63347 |                                                                                                                                                                                                                                  | Psmc2 Mssl                |           |
|        | Sodium/potassium-transporting ATPase subunit beta-3 (Sodium/potassium-dependent ATPase subunit beta-3) (ATPB-3) (CD antigen CD298)                                                                                               |                           | AT1B3_RAT |
| Q63377 |                                                                                                                                                                                                                                  | Atplb3                    |           |
|        | Solute carrier family 15 member 2 (Kidney H(+)/peptide cotransporter) (Oligopeptide transporter , kidney isoform)                                                                                                                |                           | S15A2_RAT |
| Q63424 | (Peptide transporter 2)                                                                                                                                                                                                          | Slc15a2 Pept2             |           |
| Q63537 | Synapsin-2 (Synapsin II)                                                                                                                                                                                                         | Syn2                      | SYN2_RAT  |
|        | Serine protease inhibitor A3M (Serpina A3M) (Serine protease inhibitor 2.4) (SPI-2.4) (Fragment)                                                                                                                                 | Serpina3m                 | SPA3M_RAT |
| Q63556 |                                                                                                                                                                                                                                  |                           | PRS6A_RAT |
|        | 26S protease regulatory subunit 6A (26S proteasome AAA-ATPase subunit RPT5) (Proteasome 26S subunit ATPase 3) (Spermatogenic cell/sperm-associated Tat-binding protein homolog SATA) (Tat-binding protein 1) (TBP-1)             | Psmc3 Tbp1                |           |
| Q63569 | Proteasome activator complex subunit 1 (11S regulator complex subunit alpha) (REG-alpha) (Activator of multicatalytic protease subunit 1) (Proteasome activator 28 subunit alpha) (PA28a) (PA28alpha)                            |                           | PSME1_RAT |
| Q63797 |                                                                                                                                                                                                                                  | Psmel                     |           |
|        | NADH dehydrogenase [ubiquinone] iron-sulfur protein 2, mitochondrial (EC 1.6.5.3) (EC 1.6.99.3) (Complex I-49kD) (CI-49kD) (NADH-ubiquinone oxidoreductase 49 kDa subunit)                                                       |                           | NDUS2_RAT |
| Q641Y2 |                                                                                                                                                                                                                                  | Ndufs2                    |           |
| Q641Y8 | ATP-dependent RNA helicase DDX1 (EC 3.6.4.13) (DEAD box protein 1)                                                                                                                                                               | Ddx1                      | DDXI_RAT  |
|        | Serine/threonine-protein kinase PAK 2 (EC 2.7.11.1) (Gamma-PAK) (p21-activated kinase 2) (PAK-2) [Cleaved into: PAK-2p27; PAK-2p34]                                                                                              |                           | PAK2_RAT  |
| Q64303 |                                                                                                                                                                                                                                  | Pak2                      |           |
|        | 2,4-dienoyl-CoA reductase, mitochondrial (EC 1.3.1.34) (2,4-dienoyl-CoA reductase [NADPH]) (4-enoyl-CoA reductase [NADPH])                                                                                                       |                           | DECR_RAT  |
| Q64591 |                                                                                                                                                                                                                                  | Decri Deer                |           |
|        | Serine/threonine-protein phosphatase 6 catalytic subunit (PP6C) (EC 3.1.3.16) (Protein phosphatase V) (PP-V) [Cleaved into: Serine/threonine-protein phosphatase 6 catalytic subunit, N-terminally processed]                    |                           | PPP6_RAT  |
| Q64620 |                                                                                                                                                                                                                                  | Ppp6c Ppv                 |           |
| Q66HA8 | Heat shock protein 105 kDa (Heat shock 110 kDa protein)                                                                                                                                                                          | Hsphl Hspl05 Hspl10       | HS105_RAT |
|        | NADH-ubiquinone oxidoreductase 75 kDa subunit, mitochondrial (EC 1.6.5.3) (EC 1.6.99.3)                                                                                                                                          |                           | NDUS1_RAT |
| Q66HF1 |                                                                                                                                                                                                                                  | Ndufs1                    |           |
| Q68FR2 | Bridging integrator 2                                                                                                                                                                                                            | Bin2                      | BIN2_RAT  |
|        | Isocitrate dehydrogenase [NAO] subunit beta, mitochondrial (EC 1.1.1.41) (Isocitric dehydrogenase subunit beta) (NAD(+)-specific ICDH subunit beta)                                                                              | ldh3B                     | IDH3B_RAT |
| Q68FX0 | SUMO-activating enzyme subunit 1 (Ubiquitin-like 1-activating enzyme E1A) [Cleaved into: SUMO-activating enzyme subunit 1, N-terminally processed]                                                                               |                           | SAEI_RAT  |
| Q6AXQ0 |                                                                                                                                                                                                                                  | Sael Ublela               |           |
|        | Redox-regulatory protein FAM213A (Peroxiredoxin-like 2 activated in M-CSF stimulated monocytes) (Protein PAMM) (Sperm head protein 1)                                                                                            |                           | F213A_RAT |
| Q6AXX6 |                                                                                                                                                                                                                                  | Fam213a Pamm Shpl         |           |
| Q6AXY0 | Glutathione S-transferase A6 (EC 2.5.1.18) (GST class-alpha member6)                                                                                                                                                             | Gsta6                     | GSTA6_RAT |

|          |                                                                                                                                                                                                                                                                                                                                                   |                             |           |
|----------|---------------------------------------------------------------------------------------------------------------------------------------------------------------------------------------------------------------------------------------------------------------------------------------------------------------------------------------------------|-----------------------------|-----------|
|          | ADP-sugar pyrophosphatase (EC 3.6.1.13) (8-oxo-dGDP phosphatase) (EC 3.6.1.58) (Nucleoside diphosphate-linked moiety X motif 5) (Nudix motif 5)                                                                                                                                                                                                   |                             | NUDTS_RAT |
| Q6AY63   |                                                                                                                                                                                                                                                                                                                                                   | NudtS                       |           |
| Q6AYT3   | tRNA-splicing ligase RtcB homolog (EC 6.5.1.3) (pSS)                                                                                                                                                                                                                                                                                              | RtcB                        | RTCB_RAT  |
|          | Peptidyl-prolyl cis-trans isomerase D (PPIase D) (EC 5.2.1.8) (40 kDa peptidyl-prolyl cis-trans isomerase) (Cyclophilin-40)                                                                                                                                                                                                                       |                             | PPID_RAT  |
| Q6DGG0   | (CYP-40) (Rotamase D)                                                                                                                                                                                                                                                                                                                             | Ppid                        |           |
|          | N(G),N(G)-dimethylarginine dimethylaminohydrolase 2 (DDAH-2) (Dimethylarginine dimethylaminohydrolase 2) (EC 3.5.3.18) (DDAHII) (Dimethylargininase-2)                                                                                                                                                                                            |                             | DDAH2_RAT |
| Q6MG60   |                                                                                                                                                                                                                                                                                                                                                   | Ddah2                       |           |
|          | T-complex protein 1 subunit gamma (TCP-1-gamma) (CCT-gamma)                                                                                                                                                                                                                                                                                       |                             | TCPG_RAT  |
| Q6P502   |                                                                                                                                                                                                                                                                                                                                                   | Cct3                        |           |
|          | Dihydrolipoyl dehydrogenase, mitochondrial (EC 1.8.1.4) (Dihydrolipoamide dehydrogenase)                                                                                                                                                                                                                                                          |                             | DLDH_RAT  |
| Q6P6R2   |                                                                                                                                                                                                                                                                                                                                                   | Did                         |           |
|          | V-type proton ATPase subunit E 1 (V-ATPase subunit E 1)                                                                                                                                                                                                                                                                                           |                             | VATE1_RAT |
| Q6PCU2   |                                                                                                                                                                                                                                                                                                                                                   | Atp6v1e1                    |           |
|          | (Vacuolar proton pump subunit E 1)                                                                                                                                                                                                                                                                                                                |                             |           |
| Q6Q0N1   | Cytosolic non-specific dipeptidase (EC 3.4.13.18) (CNDP dipeptidase 2)                                                                                                                                                                                                                                                                            | Cndp2                       | CNDP2_RAT |
| Q6VBQ5   | Myeloid-associated differentiation marker (Myeloid up-regulated protein)                                                                                                                                                                                                                                                                          | Myadm                       | MYADM_RAT |
|          | Histone-binding protein RBBP7 (Nucleosome-remodeling factor subunit RBAP46) (Retinoblastoma-binding protein 7) (RBBP-7)                                                                                                                                                                                                                           |                             | RBBP7_RAT |
| Q71UF4   |                                                                                                                                                                                                                                                                                                                                                   | Rbbp7                       |           |
|          | Splicing factor U2AF 26 kDa subunit (Liver regeneration-related protein LRRG157/LRRG158) (U2 auxiliary factor 26) (U2 small nuclear RNA auxiliary factor 1-like protein 4)                                                                                                                                                                        |                             | U2AF4_RAT |
| Q7TP17   |                                                                                                                                                                                                                                                                                                                                                   | U2af114 Cb2-806 Cb2-807     |           |
|          | Cytochrome b-c1 complex subunit 8 (Complex III subunit 8) (Complex III subunit VIII) (Low molecular mass ubiquinone-binding protein) (Ubiquinol-cytochrome c reductase complex 9.5 kDa protein) (Ubiquinol-cytochrome c reductase complex ubiquinone-binding protein QP-C)                                                                        |                             | QCR8_RAT  |
| Q7TQ16   |                                                                                                                                                                                                                                                                                                                                                   | Uqcrc Qpc                   |           |
|          | Small glutamine-rich tetratricopeptide repeat-containing protein beta (Beta-SGT) (Small glutamine-rich protein with tetratricopeptide repeats 2)                                                                                                                                                                                                  |                             | SGTB_RAT  |
| Q80W98   |                                                                                                                                                                                                                                                                                                                                                   | Sgtb Sgt2                   |           |
|          | Nicotinamide phosphoribosyltransferase (NAMPTase) (Nampt) (EC 2.4.2.12) (Pre-B-cell colony-enhancing factor 1 homolog) (PBEF) (Visfatin)                                                                                                                                                                                                          |                             | NAMPT_RAT |
| Q80Z29   |                                                                                                                                                                                                                                                                                                                                                   | Nampt Pbefl                 |           |
|          | Lambda-crystallin homolog (EC 1.1.1.45) (L-gulonate 3-dehydrogenase) (Gul3DH)                                                                                                                                                                                                                                                                     |                             | CRYLI_RAT |
| Q811X6   |                                                                                                                                                                                                                                                                                                                                                   | Cryll Cry                   |           |
| Q8CFD0   | Sideroflexin-5 (Tricarboxylate carrier BBG-TCC)                                                                                                                                                                                                                                                                                                   | SfxnS                       | SFXNS_RAT |
| Q8CFN2   | Cell division control protein 42 homolog                                                                                                                                                                                                                                                                                                          | Cdc42                       | CDC42_RAT |
|          | Glycylpeptide N-tetradecanoyltransferase 1 (EC 2.3.1.97) (Myristoyl-CoA:protein N-myristoyltransferase 1) (NMT 1) (Type I N-myristoyltransferase) (Peptide N-myristoyltransferase 1)                                                                                                                                                              |                             | NMTI_RAT  |
| Q8K1Q0   |                                                                                                                                                                                                                                                                                                                                                   | Nmtl                        |           |
|          | Monoglyceride lipase (MGL) (EC 3.1.1.23) (Monoacylglycerol lipase) (MAGL)                                                                                                                                                                                                                                                                         |                             | MGLL_RAT  |
| Q8R431   |                                                                                                                                                                                                                                                                                                                                                   | MglI Mgl2                   |           |
|          | Pyridoxal phosphate phosphatase (PLP phosphatase) (EC 3.1.3.3) (EC 3.1.3.74) (Chronophin) (Reg I-binding protein 1)                                                                                                                                                                                                                               |                             | PLPP_RAT  |
| Q8VD52   |                                                                                                                                                                                                                                                                                                                                                   | Pdpx Cin Pip Plpp Rbpl      |           |
|          | Bifunctional protein NCOAT (Meningioma-expressed antigen 5) (Nuclear cytoplasmic O-GlcNAcase and acetyltransferase) [Includes: Beta-hexosaminidase (EC 3.2.1.52) (Beta-N-acetylhexosaminidase) (Hexosaminidase C) (N-acetyl-beta-D-glucosaminidase) (N-acetyl-beta-glucosaminidase) (O-GlcNAcase); Histone acetyltransferase (HAT) (EC 2.3.1.48)] |                             | NCOAT_RAT |
| Q8VIJS   |                                                                                                                                                                                                                                                                                                                                                   | Mgeas Hexc Meas             |           |
|          | Phosphatidate cytidyltransferase 2 (EC 2.7.7.41) (CDP-DAG synthase 2) (CDP-DG synthase 2) (CDP-diacylglycerol synthase 2) (CDS 2) (CDP-diglyceride pyrophosphorylase 2) (CDP-diglyceride synthase 2) (CTP:phosphatidate cytidyltransferase 2)                                                                                                     |                             | CDS2_RAT  |
| Q91XU8   |                                                                                                                                                                                                                                                                                                                                                   | Cds2                        |           |
| Q91Y81   | Septin-2 (Vascular endothelial cell specific protein 11)                                                                                                                                                                                                                                                                                          | Sept2 Vesp11                | SEPT2_RAT |
|          | Succinate dehydrogenase [ubiquinone] flavoprotein subunit, mitochondrial (EC 1.3.5.1) (Flavoprotein subunit of complex II) (Fp)                                                                                                                                                                                                                   |                             | SDHA_RAT  |
| Q920L2   |                                                                                                                                                                                                                                                                                                                                                   | Sdha                        |           |
|          | RWD domain-containing protein 1 (Small androgen receptor-interacting protein)                                                                                                                                                                                                                                                                     |                             | RWDDI_RAT |
| Q99ND9   |                                                                                                                                                                                                                                                                                                                                                   | Rwddl Sarip                 |           |
|          | Electrogenic sodium bicarbonate cotransporter 1 (Sodium bicarbonate cotransporter) (NBC-like protein) (Na(+)/HCO3(-) cotransporter) (Solute carrier family 4 member4)                                                                                                                                                                             |                             | S4A4_RAT  |
| Q9JI66-3 |                                                                                                                                                                                                                                                                                                                                                   | Slc4a4 Nbc NbcI Nbccl Rnbcl |           |



|        |                                                                                                                                                                                                                                 |                             |           |
|--------|---------------------------------------------------------------------------------------------------------------------------------------------------------------------------------------------------------------------------------|-----------------------------|-----------|
|        | Myosin-10 (Cellular myosin heavy chain , type B) (Myosin heavy chain 10) (Myosin heavy chain , non-muscle <b>lib</b> ) (Non-muscle myosin heavy chain B) (NMMHC-B) (Non-muscle myosin heavy chain lib) (NMMHC 11-b) (NMMHC-11B) |                             | MYH10_RAT |
| Q9JLT0 |                                                                                                                                                                                                                                 | Myh10                       |           |
|        | Vesicle-fusing ATPase (EC 3.6.4.6) (N-ethylmaleimide-sensitive fusion protein) (NEM-sensitive fusion protein)                                                                                                                   |                             | NSF_RAT   |
| Q9QUL6 | (Vesicular-fusion protein NSF)                                                                                                                                                                                                  | Nsf Ergl                    |           |
|        | LanC-like protein 1 (40 kDa erythrocyte membrane protein)                                                                                                                                                                       |                             | LANCL_RAT |
| Q9QX69 | (p40)                                                                                                                                                                                                                           | Lanell Gpr69a               |           |
|        | Unconventional myosin-Va (Dilute myosin heavy chain, non-                                                                                                                                                                       |                             | MYOSA_RAT |
|        | muscle)                                                                                                                                                                                                                         |                             |           |
| Q9QYF3 |                                                                                                                                                                                                                                 | MyoSa                       |           |
|        | MOB-like protein phocein (Class II mMOBI) (Mobl homolog 3) (Mob3) (Mps one binder kinase activator-like 3)                                                                                                                      |                             | PHOCN_RAT |
| Q9QYW3 | (Phocein) (Preimplantation protein 3)                                                                                                                                                                                           | 1ob4 Mob3 MobkII Phocn Prei |           |
|        | Legumain (EC 3.4.22.34) (Asparaginyl endopeptidase)                                                                                                                                                                             |                             | LGMN_RAT  |
|        | (Prot ease, cysteine 1)                                                                                                                                                                                                         |                             |           |
| Q9R0J8 |                                                                                                                                                                                                                                 | Lgmn Prscl                  |           |
|        | Mitochondrial import inner membrane translocase subunit                                                                                                                                                                         |                             | TIM8A_RAT |
| Q9WVA1 | Tim8 A (Deafness dystonia protein 1 homolog)                                                                                                                                                                                    | Timm8a Ddpl Tim8a           |           |
|        | Protein kinase C and casein kinase substrate in neurons                                                                                                                                                                         |                             | PACNI_RAT |
|        | protein 1 (Dynamin proline-rich domain-interacting protein) (Dynamin PRO-interacting protein) (Synaptic ,                                                                                                                       |                             |           |
|        | dynamin-associated protein I) (Syndapin-1) (Syndapin-1)                                                                                                                                                                         |                             |           |
| Q9Z0WS | (Sdpl)                                                                                                                                                                                                                          | Pacsinl                     |           |
|        | NEDD8-activating enzyme E1 regulatory subunit (Amyloid beta precursor protein-binding protein 1, 59 kDa) (APP-                                                                                                                  |                             | ULAI_RAT  |
| Q9Z1AS | BPI) (Amyloid protein-binding protein 1)                                                                                                                                                                                        | Nael Appbpl                 |           |
|        | 3'(2'),5'-bisphosphate nucleotidase 1 (EC 3.1.3.7)                                                                                                                                                                              |                             | BPNTI_RAT |
|        | (Bisphosphate 3'-nucleotidase 1) (PAP-inositol 1,4-                                                                                                                                                                             |                             |           |
| Q9Z1N4 | phosphatase) (PIP) (schAL2 analogous 3)                                                                                                                                                                                         | Bpntl Sal3                  |           |
|        | Vesicle-associated membrane protein-associated protein A                                                                                                                                                                        |                             | VAPA_RAT  |
|        | (VAMP-A) (VAMP-associated protein A) (VAP-A) (33 kDa                                                                                                                                                                            |                             |           |
| Q9Z270 | VAMP-associated protein) (VAP-33)                                                                                                                                                                                               | Vapa Vap33                  |           |

Suppl ementary Table S4A: GO Analysis of the proteins altered by GRP78 overexpression (Terms from the Process Ontology of gene\_association.rgd with p-value &lt;= 0.05; PROCESS)

| Gene Ontology term                                   | Cluster frequency      | Genome frequency           | Corrected P-value | FDR   | False Positives | Genes annotated to the term                                                                                                                                                                                                                                                                                                                                                                                                                                                                                                                                                                                                                                                                                                                                                                                                                                                                                                                   |
|------------------------------------------------------|------------------------|----------------------------|-------------------|-------|-----------------|-----------------------------------------------------------------------------------------------------------------------------------------------------------------------------------------------------------------------------------------------------------------------------------------------------------------------------------------------------------------------------------------------------------------------------------------------------------------------------------------------------------------------------------------------------------------------------------------------------------------------------------------------------------------------------------------------------------------------------------------------------------------------------------------------------------------------------------------------------------------------------------------------------------------------------------------------|
| <a href="#">oxidation-reduction process</a>          | 33 of 220 genes, 15.0% | 1899 of 36892 genes, 5.1%  | 3.52e-05          | 0.00% | 0.00            | LDHA_RAT, CRYLI_RAT, VATI_RAT, QCR8_RAT, F213A_RAT, NDUS4_RAT, DHE3_RAT, NDUSI_RAT, ACADL_RAT, DLDH_RAT, ECHM_RAT, COX2_RAT, AOFA_RAT, GLYG_RAT, FTO_RAT, IVD_RAT, DECR_RAT, SODM_RAT, TPIS_RAT, DHB4_RAT, NSDHL_RAT, NDUS2_RAT, MGSTI_RAT, GSTKI_RAT, HCD2_RAT, ECHB_RAT, ECHI_RAT, TRAPI_RAT, DHSO_RAT, NDUV2_RAT, SDHA_RAT, UCRI_RAT, CITC_RAT                                                                                                                                                                                                                                                                                                                                                                                                                                                                                                                                                                                             |
| <a href="#">small molecule metabolic process</a>     | 57 of 220 genes, 25.9% | 4674 of 36892 genes, 12.7% | 7.79e-05          | 0.00% | 0.00            | LTOR3_RAT, LDHA_RAT, CRYLI_RAT, BCATI_RAT, EFTU_RAT, DHE3_RAT, MGLL_RAT, RASAI_RAT, NUDT3_RAT, GSHO_RAT, NDUSI_RAT, ACADL_RAT, IDHGI_RAT, CN37_RAT, NAMPT_RAT, TPMI_RAT, ECHM_RAT, MVDI_RAT, RPGF2_RAT, GSTM4_RAT, GNAO_RAT, NUDTS_RAT, KINH_RAT, IVD_RAT, MYH9_RAT, ATPA_RAT, DECR_RAT, KPYM_RAT, MYPR_RAT, SODM_RAT, DDXI_RAT, TPIS_RAT, DHB4_RAT, NSDHL_RAT, S27AI_RAT, MGSTI_RAT, SEPT2_RAT, CDC42_RAT, GSTKI_RAT, DPYL4_RAT, TBA4A_RAT, ECHB_RAT, ECHI_RAT, EFIAI_RAT, NSF_RAT, AT1A2_RAT, GSTA6_RAT, GDIRI_RAT, NDUV2_RAT, ATPG_RAT, SDHA_RAT, DDAH2_RAT, ACSF2_RAT, LISI_RAT, NAKD2_RAT, ATP8_RAT, CITC_RAT                                                                                                                                                                                                                                                                                                                            |
| <a href="#">carboxylic acid metabolic process</a>    | 27 of 220 genes, 12.3% | 1452 of 36892 genes, 3.9%  | 0.00018           | 0.00% | 0.00            | MYPR_RAT, SODM_RAT, TPIS_RAT, LDHA_RAT, CRYLI_RAT, DHB4_RAT, BCATI_RAT, S27AI_RAT, MGSTI_RAT, GSTKI_RAT, DHE3_RAT, MGLL_RAT, ECHB_RAT, GSHO_RAT, ECHI_RAT, ACADL_RAT, IDHGI_RAT, ECHM_RAT, GSTM4_RAT, GSTA6_RAT, SDHA_RAT, DDAH2_RAT, ACSF2_RAT, IVD_RAT, DECR_RAT, KPYM_RAT, CITC_RAT                                                                                                                                                                                                                                                                                                                                                                                                                                                                                                                                                                                                                                                        |
| <a href="#">organismal metabolic process</a>         | 88 of 220 genes, 40.0% | 9029 of 36892 genes, 24.5% | 0.00024           | 0.00% | 0.00            | RPNI_RAT, LDHA_RAT, CDS2_RAT, BCATI_RAT, NDU54_RAT, MGLL_RAT, NUDT3_RAT, GSHO_RAT, IDHGI_RAT, NAMPT_RAT, ECHM_RAT, COX2_RAT, MVDI_RAT, RPGF2_RAT, GSTM4_RAT, GLYG_RAT, PLPP_RAT, FTO_RAT, IVD_RAT, ATPA_RAT, KPYM_RAT, DDXI_RAT, TPIS_RAT, DLG4_RAT, BPNTI_RAT, DHB4_RAT, NDUS2_RAT, NSDHL_RAT, S27AI_RAT, SEPT2_RAT, TBA4A_RAT, HCD2_RAT, EFIAI_RAT, NSF_RAT, KPCA_RAT, RS3_RAT, AT1A2_RAT, CIOB_RAT, GDIRI_RAT, GSTPI_RAT, NDUV2_RAT, ATPG_RAT, SDHA_RAT, DDAH2_RAT, ACSF2_RAT, ATP8_RAT, STS_RAT, LTOR3_RAT, CRYLI_RAT, CYTC_RAT, VATI_RAT, EFTU_RAT, NCOAT_RAT, QCR8_RAT, F213A_RAT, DHE3_RAT, RASAI_RAT, PLOLI_RAT, NDUSI_RAT, ACADL_RAT, ANMI_RAT, CN37_RAT, DLDH_RAT, TPMI_RAT, GNAO_RAT, AOFA_RAT, NUDT5_RAT, KINH_RAT, PLCGI_RAT, MYH9_RAT, DECR_RAT, MYPR_RAT, SODM_RAT, DADI_RAT, MGSTI_RAT, CDC42_RAT, GSTKI_RAT, DPYL4_RAT, ECHB_RAT, ECHI_RAT, TRAPI_RAT, DHSO_RAT, GSTA6_RAT, LISI_RAT, NAKD2_RAT, UCRI_RAT, PYC_RAT, CITC_RAT |
| <a href="#">oxoacid metabolic process</a>            | 27 of 220 genes, 12.3% | 1535 of 36892 genes, 4.2%  | 0.00055           | 0.00% | 0.00            | MYPR_RAT, SODM_RAT, TPIS_RAT, LDHA_RAT, CRYLI_RAT, DHB4_RAT, BCATI_RAT, S27AI_RAT, MGSTI_RAT, GSTKI_RAT, DHE3_RAT, MGLL_RAT, ECHB_RAT, GSHO_RAT, ECHI_RAT, ACADL_RAT, IDHGI_RAT, ECHM_RAT, GSTM4_RAT, GSTA6_RAT, SDHA_RAT, DDAH2_RAT, ACSF2_RAT, IVD_RAT, DECR_RAT, KPYM_RAT, CITC_RAT                                                                                                                                                                                                                                                                                                                                                                                                                                                                                                                                                                                                                                                        |
| <a href="#">organic acid metabolic process</a>       | 27 of 220 genes, 12.3% | 1564 of 36892 genes, 4.2%  | 0.00079           | 0.00% | 0.00            | MYPR_RAT, SODM_RAT, TPIS_RAT, LDHA_RAT, CRYLI_RAT, DHB4_RAT, BCATI_RAT, S27AI_RAT, MGSTI_RAT, GSTKI_RAT, DHE3_RAT, MGLL_RAT, ECHB_RAT, GSHO_RAT, ECHI_RAT, ACADL_RAT, IDHGI_RAT, ECHM_RAT, GSTM4_RAT, GSTA6_RAT, SDHA_RAT, DDAH2_RAT, ACSF2_RAT, IVD_RAT, DECR_RAT, KPYM_RAT, CITC_RAT                                                                                                                                                                                                                                                                                                                                                                                                                                                                                                                                                                                                                                                        |
| <a href="#">hydrogen ion transmembrane transport</a> | 10 of 220 genes, 4.5%  | 227 of 36892 genes, 0.6%   | 0.00122           | 0.00% | 0.00            | COX41_RAT, COX2_RAT, ATPG_RAT, QCR8_RAT, UCRI_RAT, VATEI_RAT, ATPA_RAT, CX7A2_RAT, ATP8_RAT, MPCP_RAT                                                                                                                                                                                                                                                                                                                                                                                                                                                                                                                                                                                                                                                                                                                                                                                                                                         |
| <a href="#">proton transport</a>                     | 10 of 220 genes, 4.5%  | 273 of 36892 genes, 0.7%   | 0.00633           | 0.00% | 0.00            | COX41_RAT, COX2_RAT, ATPG_RAT, QCR8_RAT, UCRI_RAT, VATEI_RAT, ATPA_RAT, CX7A2_RAT, ATP8_RAT, MPCP_RAT                                                                                                                                                                                                                                                                                                                                                                                                                                                                                                                                                                                                                                                                                                                                                                                                                                         |
| <a href="#">glutathione metabolic process</a>        | 6 of 220 genes, 2.7%   | 76 of 36892 genes, 0.2%    | 0.00645           | 0.00% | 0.00            | SODM_RAT, MGSTI_RAT, GSTKI_RAT, GSTM4_RAT, GSHO_RAT, GSTA6_RAT                                                                                                                                                                                                                                                                                                                                                                                                                                                                                                                                                                                                                                                                                                                                                                                                                                                                                |
| <a href="#">hydrogen transport</a>                   | 10 of 220 genes, 4.5%  | 275 of 36892 genes, 0.7%   | 0.00674           | 0.00% | 0.00            | COX41_RAT, COX2_RAT, ATPG_RAT, QCR8_RAT, UCRI_RAT, VATEI_RAT, ATPA_RAT, CX7A2_RAT, ATP8_RAT, MPCP_RAT                                                                                                                                                                                                                                                                                                                                                                                                                                                                                                                                                                                                                                                                                                                                                                                                                                         |

Suppl ementary Table S4B: GO Analysis of the proteins altered by GRP78 overexpression (Terms from the Process Ontology of gene\_association.rgd with p-value &lt;= 0.05; FUNCTION)

| Gene Ontology term                                            | Cluster frequency      | Genome frequency          | Corrected P-value | FDR   | False Positives | Genes annotated to the term                                                                                                                                                                                                                             |
|---------------------------------------------------------------|------------------------|---------------------------|-------------------|-------|-----------------|---------------------------------------------------------------------------------------------------------------------------------------------------------------------------------------------------------------------------------------------------------|
| <a href="#">oxidoreductase activity</a>                       | 24 of 220 genes, 10.9% | 1489 of 36892 genes, 4.0% | 0.00231           | 0.00% | 0.00            | COX41_RAT, SODM_RAT, CRYLI_RAT, DHB4_RAT, VATI_RAT, NDUS2_RAT, NSDHL_RAT, QCR8_RAT, MGSTI_RAT, GSTKI_RAT, DHE3_RAT, HCD2_RAT, NDUSI_RAT, ACADL_RAT, IDHGI_RAT, COX2_RAT, DHSO_RAT, NDUV2_RAT, SDHA_RAT, IVD_RAT, FTO_RAT, CX7A2_RAT, DECR_RAT, CITC_RAT |
| <a href="#">structural molecule activity</a>                  | 22 of 220 genes, 10.0% | 1375 of 36892 genes, 3.7% | 0.00614           | 1.00% | 0.02            | LTOR3_RAT, RS19_RAT, RS26_RAT, NFL_RAT, RL23A_RAT, CLCA_RAT, VAPA_RAT, RS29_RAT, RL18_RAT, RL32_RAT, RLIS_RAT, SEPT2_RAT, TBA4A_RAT, RS3_RAT, RS8_RAT, RL9_RAT, CLCB_RAT, RLIOA_RAT, RL8_RAT, RS9_RAT, RL13_RAT, RLAA_RAT                               |
| <a href="#">hydrogen ion transmembrane transport activity</a> | 8 of 220 genes, 3.6%   | 201 of 36892 genes, 0.5%  | 0.00648           | 0.67% | 0.02            | COX41_RAT, QCR8_RAT, VATEI_RAT, ATPA_RAT, COX2_RAT, CX7A2_RAT, ATP8_RAT, ATPG_RAT                                                                                                                                                                       |
| <a href="#">3-hydroxyacyl-CoA dehydrogenase activity</a>      | 3 of 220 genes, 1.4%   | 12 of 36892 genes, 0.0%   | 0.00950           | 1.00% | 0.04            | CRYLI_RAT, DHB4_RAT, HCD2_RAT                                                                                                                                                                                                                           |

Suppl ementary Table 4C: GO Analysis of the proteins altered by GRP78 overexpression (Terms from the Process Ontology of gene\_association.rgd with p-value &lt;= 0.05; COMPONENT)

| Gene Ontology term                           | Cluster frequency      | Genome frequency         | Corrected P-value | FDR   | False Positives | Genes annotated to the term                                                                                                                                                                                                                                                                                                                 |
|----------------------------------------------|------------------------|--------------------------|-------------------|-------|-----------------|---------------------------------------------------------------------------------------------------------------------------------------------------------------------------------------------------------------------------------------------------------------------------------------------------------------------------------------------|
| <a href="#">mitochondrial membrane</a>       | 32 of 220 genes, 14.5% | 916 of 36892 genes, 2.5% | 2.03e-13          | 0.00% | 0.00            | COX41_RAT, KCRU_RAT, SODM_RAT, CDS2_RAT, VATI_RAT, NDUS2_RAT, M20M_RAT, QCR8_RAT, MGSTI_RAT, NDU54_RAT, GSTKI_RAT, DHE3_RAT, ECHB_RAT, MPCP_RAT, NDUSI_RAT, ACADL_RAT, LETMI_RAT, TRAPI_RAT, KPCA_RAT, COX2_RAT, DHSO_RAT, VDACC2_RAT, TIM13_RAT, NDUV2_RAT, ATPG_RAT, SDHA_RAT, PYC_RAT, IVD_RAT, ATPA_RAT, CX7A2_RAT, ATP8_RAT, SFXNS_RAT |
| <a href="#">mitochondrial envelope</a>       | 32 of 220 genes, 14.5% | 977 of 36892 genes, 2.6% | 1.21e-12          | 0.00% | 0.00            | COX41_RAT, KCRU_RAT, SODM_RAT, CDS2_RAT, VATI_RAT, NDUS2_RAT, M20M_RAT, QCR8_RAT, MGSTI_RAT, NDU54_RAT, GSTKI_RAT, DHE3_RAT, ECHB_RAT, MPCP_RAT, NDUSI_RAT, ACADL_RAT, LETMI_RAT, TRAPI_RAT, KPCA_RAT, COX2_RAT, DHSO_RAT, VDACC2_RAT, TIM13_RAT, NDUV2_RAT, ATPG_RAT, SDHA_RAT, PYC_RAT, IVD_RAT, ATPA_RAT, CX7A2_RAT, ATP8_RAT, SFXNS_RAT |
| <a href="#">mitochondrial inner membrane</a> | 26 of 220 genes, 11.8% | 632 of 36892 genes, 1.7% | 2.86e-12          | 0.00% | 0.00            | COX41_RAT, KCRU_RAT, SODM_RAT, CDS2_RAT, NDUS2_RAT, M20M_RAT, QCR8_RAT, MGSTI_RAT, NDU54_RAT, GSTKI_RAT, DHE3_RAT, ECHB_RAT, MPCP_RAT, NDUSI_RAT, LETMI_RAT, TRAPI_RAT, COX2_RAT, TIM13_RAT, NDUV2_RAT, ATPG_RAT, SDHA_RAT, PYC_RAT, ATPA_RAT, CX7A2_RAT, ATP8_RAT, SFXNS_RAT                                                               |



|                                 |                         |                             |          |       |      |                                                                                                                                                                                                                                                                                                                                                                                                                                                                                                                                                                                                                                                                                                                                                                                                                                                                                                                                                                                                                                                                                                                                                                                                                                                                                                                                                                                                                                                                                                                                                                                                                                                                                                                   |
|---------------------------------|-------------------------|-----------------------------|----------|-------|------|-------------------------------------------------------------------------------------------------------------------------------------------------------------------------------------------------------------------------------------------------------------------------------------------------------------------------------------------------------------------------------------------------------------------------------------------------------------------------------------------------------------------------------------------------------------------------------------------------------------------------------------------------------------------------------------------------------------------------------------------------------------------------------------------------------------------------------------------------------------------------------------------------------------------------------------------------------------------------------------------------------------------------------------------------------------------------------------------------------------------------------------------------------------------------------------------------------------------------------------------------------------------------------------------------------------------------------------------------------------------------------------------------------------------------------------------------------------------------------------------------------------------------------------------------------------------------------------------------------------------------------------------------------------------------------------------------------------------|
|                                 | 160 of 220 genes, 72.7% | 19810 of 36892 genes, 53.7% | 1.01e-06 | 0.00% | 0.00 | COX41_RAT, KCRU_RAT, LANCI_RAT, BCATI_RAT, STIPI_RAT, VATEI_RAT, 7B2_RAT, RL7_RAT, IDHGI_RAT, ECHM_RAT, PRS7_RAT, CLCB_RAT, PLPP_RAT, IVD_RAT, ATPA_RAT, NCSI_RAT, RS19_RAT, DDIX_RAT, RS26_RAT, DLG4_RAT, PTN23_RAT, MATR3_RAT, AT1B3_RAT, ELOB_RAT, NSDHL_RAT, RL32_RAT, SEPT2_RAT, ELP2_RAT, TBA4A_RAT, TPPP3_RAT, EFIAI_RAT, NSF_RAT, SCFDI_RAT, KPCCA_RAT, SH3GI_RAT, VDACC2_RAT, GDIRI_RAT, NDUV2_RAT, HS105_RAT, PSB2_RAT, CD166_RAT, NUCL_RAT, RCN2_RAT, CNPD2_RAT, CYTC_RAT, NFL_RAT, NCALD_RAT, M20M_RAT, PSMD2_RAT, QCR8_RAT, F213A_RAT, CATD_RAT, PITMI_RAT, CN37_RAT, DLDH_RAT, TPML_RAT, TIM13_RAT, KINH_RAT, RTCB_RAT, DECR_RAT, S4A4_RAT, SODM_RAT, RL23A_RAT, RL18_RAT, MGSTI_RAT, CDC42_RAT, GSTKI_RAT, ECHB_RAT, RSB_RAT, NAKD2_RAT, LISI_RAT, CALX_RAT, SFXN5_RAT, NMTI_RAT, RPNL_RAT, CDS2_RAT, PSB8_RAT, S15A2_RAT, PAK2_RAT, RBBP7_RAT, CSK2B_RAT, NDU5A_RAT, MGLL_RAT, NUDT3_RAT, MPCP_RAT, SYN2_RAT, FIOAI_RAT, COX2_RAT, RPF2_RAT, GSTM4_RAT, RLIOA_RAT, CSKP_RAT, GLYG_RAT, LGMN_RAT, MYO5A_RAT, FTO_RAT, SNAAR_RAT, SYTI_RAT, CSRP1_RAT, BPN1_RAT, DHB4_RAT, ROCK2_RAT, VAPA_RAT, U2AF4_RAT, NDU52_RAT, LG3BP_RAT, HCD2_RAT, IDH3B_RAT, LPPRC_RAT, RS3_RAT, TBCE_RAT, ULAI_RAT, GSTPI_RAT, ATPG_RAT, SDHA_RAT, DDAH2_RAT, ACSF2_RAT, PSA6_RAT, SCAMI_RAT, ATPB_RAT, GAK_RAT, RLAO_RAT, LTOR3_RAT, CRYLI_RAT, PPID_RAT, MYHIO_RAT, VATI_RAT, ROGDI_RAT, MARE3_RAT, EFTU_RAT, PACNI_RAT, NCOAT_RAT, PRS6A_RAT, DHE3_RAT, ATIBI_RAT, NDU5I_RAT, ACADL_RAT, ANMI_RAT, SAEI_RAT, RL9_RAT, RL8_RAT, PLCGI_RAT, MYH9_RAT, CX7A2_RAT, VGF_RAT, RL13_RAT, PHOCN_RAT, RAB3C_RAT, CLCA_RAT, MTPN_RAT, DADI_RAT, RL15_RAT, RL13A_RAT, ECHI_RAT, TRAPI_RAT, LETMI_RAT, DHSO_RAT, PYC_RAT, BIN2_RAT |
| membrane-bounded vesicle        | 64 of 220 genes, 29.1%  | 5298 of 36892 genes, 14.4%  | 2.65e-06 | 0.00% | 0.00 | COX41_RAT, LANCI_RAT, RPNL_RAT, PSB8_RAT, S15A2_RAT, CSK2B_RAT, NUDT3_RAT, SYN2_RAT, FIOAI_RAT, 7B2_RAT, GSTM4_RAT, CLCB_RAT, GLYG_RAT, MYO5A_RAT, PLPP_RAT, NCSI_RAT, SNAAR_RAT, SYTI_RAT, RS26_RAT, PTN23_RAT, DLG4_RAT, CSRP1_RAT, BPN1_RAT, AT1B3_RAT, LG3BP_RAT, SEPT2_RAT, TBA4A_RAT, TPPP3_RAT, GDIRI_RAT, DDAH2_RAT, HS105_RAT, PSA6_RAT, SCAMI_RAT, CD166_RAT, PSB2_RAT, LTOR3_RAT, CYTC_RAT, CNPD2_RAT, CRYLI_RAT, VATI_RAT, NCALD_RAT, EFTU_RAT, PSMD2_RAT, F213A_RAT, PACNI_RAT, ATIBI_RAT, CATD_RAT, CN37_RAT, KINH_RAT, VGF_RAT, SODM_RAT, S4A4_RAT, RAB3C_RAT, CLCA_RAT, MTPN_RAT, DADI_RAT, GSTKI_RAT, CDC42_RAT, ECHB_RAT, ECHI_RAT, TRAPI_RAT, RSB_RAT, LISI_RAT, CALX_RAT                                                                                                                                                                                                                                                                                                                                                                                                                                                                                                                                                                                                                                                                                                                                                                                                                                                                                                                                                                                                                      |
| vesicle                         | 64 of 220 genes, 29.1%  | 5460 of 36892 genes, 14.8%  | 8.44e-06 | 0.00% | 0.00 | COX41_RAT, LANCI_RAT, RPNL_RAT, PSB8_RAT, S15A2_RAT, CSK2B_RAT, NUDT3_RAT, SYN2_RAT, FIOAI_RAT, 7B2_RAT, GSTM4_RAT, CLCB_RAT, GLYG_RAT, MYO5A_RAT, PLPP_RAT, NCSI_RAT, SNAAR_RAT, SYTI_RAT, RS26_RAT, PTN23_RAT, DLG4_RAT, CSRP1_RAT, BPN1_RAT, AT1B3_RAT, LG3BP_RAT, SEPT2_RAT, TBA4A_RAT, TPPP3_RAT, GDIRI_RAT, DDAH2_RAT, HS105_RAT, PSA6_RAT, SCAMI_RAT, CD166_RAT, PSB2_RAT, LTOR3_RAT, CYTC_RAT, CNPD2_RAT, CRYLI_RAT, VATI_RAT, NCALD_RAT, EFTU_RAT, PSMD2_RAT, F213A_RAT, PACNI_RAT, ATIBI_RAT, CATD_RAT, CN37_RAT, KINH_RAT, VGF_RAT, SODM_RAT, S4A4_RAT, RAB3C_RAT, CLCA_RAT, MTPN_RAT, DADI_RAT, GSTKI_RAT, CDC42_RAT, ECHB_RAT, ECHI_RAT, TRAPI_RAT, RSB_RAT, LISI_RAT, CALX_RAT                                                                                                                                                                                                                                                                                                                                                                                                                                                                                                                                                                                                                                                                                                                                                                                                                                                                                                                                                                                                                      |
| in intracellular organelle      | 93 of 220 genes, 42.3%  | 9439 of 36892 genes, 25.6%  | 1.00e-05 | 0.00% | 0.00 | COX41_RAT, KCRU_RAT, RPNL_RAT, CDS2_RAT, RBBP7_RAT, NDU5A_RAT, CSK2B_RAT, MPCP_RAT, ECHM_RAT, COX2_RAT, RLIOA_RAT, CLCB_RAT, FTO_RAT, IVD_RAT, ATPA_RAT, NCSI_RAT, SYTI_RAT, RS19_RAT, DDIX_RAT, RS26_RAT, PTN23_RAT, DLG4_RAT, ROCK2_RAT, DHB4_RAT, MATR3_RAT, VAPA_RAT, U2AF4_RAT, NDU52_RAT, NSDHL_RAT, RL32_RAT, SEPT2_RAT, ELP2_RAT, TBA4A_RAT, LPPRC_RAT, TPPP3_RAT, EFIAI_RAT, NSF_RAT, SCFDI_RAT, KPCCA_RAT, SH3GI_RAT, VDACC2_RAT, NDUV2_RAT, ATPG_RAT, SDHA_RAT, HS105_RAT, PSA6_RAT, SCAMI_RAT, ATPB_RAT, NUCL_RAT, RCN2_RAT, LTOR3_RAT, PPID_RAT, NFL_RAT, MYHIO_RAT, VATI_RAT, MARE3_RAT, M20M_RAT, ROGDI_RAT, EFTU_RAT, PACNI_RAT, QCRB_RAT, DHE3_RAT, NDU5I_RAT, ACADL_RAT, PITMI_RAT, ANMI_RAT, CN37_RAT, DLDH_RAT, TIM13_RAT, RL8_RAT, KINH_RAT, MYH9_RAT, PLCGI_RAT, CX7A2_RAT, RL13_RAT, SODM_RAT, PHOCN_RAT, CLCA_RAT, MTPN_RAT, DADI_RAT, MGSTI_RAT, CDC42_RAT, GSTKI_RAT, RL13A_RAT, ECHB_RAT, LETMI_RAT, TRAPI_RAT, DHSO_RAT, LISI_RAT, CALX_RAT, PYC_RAT, BIN2_RAT, SFXN5_RAT                                                                                                                                                                                                                                                                                                                                                                                                                                                                                                                                                                                                                                                                                                             |
| organelle part                  | 94 of 220 genes, 42.7%  | 9756 of 36892 genes, 26.4%  | 2.46e-05 | 0.00% | 0.00 | COX41_RAT, KCRU_RAT, RPNL_RAT, CDS2_RAT, RBBP7_RAT, NDU5A_RAT, CSK2B_RAT, MPCP_RAT, ECHM_RAT, COX2_RAT, CSKP_RAT, RLIOA_RAT, CLCB_RAT, FTO_RAT, IVD_RAT, ATPA_RAT, NCSI_RAT, SYTI_RAT, RS19_RAT, DDIX_RAT, RS26_RAT, PTN23_RAT, DLG4_RAT, ROCK2_RAT, DHB4_RAT, MATR3_RAT, VAPA_RAT, U2AF4_RAT, NDU52_RAT, NSDHL_RAT, RL32_RAT, SEPT2_RAT, ELP2_RAT, TBA4A_RAT, LPPRC_RAT, TPPP3_RAT, EFIAI_RAT, NSF_RAT, SCFDI_RAT, KPCCA_RAT, SH3GI_RAT, VDACC2_RAT, NDUV2_RAT, ATPG_RAT, SDHA_RAT, HSIO5_RAT, PSA6_RAT, SCAMI_RAT, ATPB_RAT, NUCL_RAT, RCN2_RAT, LTOR3_RAT, PPID_RAT, NFL_RAT, MYHIO_RAT, VATI_RAT, MARE3_RAT, M20M_RAT, ROGDI_RAT, EFTU_RAT, PACNI_RAT, QCRB_RAT, DHE3_RAT, NDU5I_RAT, ACADL_RAT, PITMI_RAT, ANMI_RAT, CN37_RAT, DLDH_RAT, TIM13_RAT, KINH_RAT, MYH9_RAT, PLCGI_RAT, CX7A2_RAT, RL13_RAT, SODM_RAT, PHOCN_RAT, CLCA_RAT, MTPN_RAT, DADI_RAT, MGSTI_RAT, CDC42_RAT, GSTKI_RAT, RL13A_RAT, ECHB_RAT, LETMI_RAT, TRAPI_RAT, DHSO_RAT, LISI_RAT, CALX_RAT, PYC_RAT, BIN2_RAT, SFXN5_RAT                                                                                                                                                                                                                                                                                                                                                                                                                                                                                                                                                                                                                                                                                                            |
| intracellular organelle         | 144 of 220 genes, 65.5% | 17906 of 36892 genes, 48.5% | 5.99e-05 | 0.00% | 0.00 | COX41_RAT, KCRU_RAT, LANCI_RAT, BCATI_RAT, STIPI_RAT, VATEI_RAT, 7B2_RAT, RL7_RAT, IDHGI_RAT, ECHM_RAT, PRS7_RAT, CLCB_RAT, PLPP_RAT, IVD_RAT, ATPA_RAT, NCSI_RAT, RS19_RAT, DDIX_RAT, RS26_RAT, DLG4_RAT, PTN23_RAT, MATR3_RAT, AT1B3_RAT, ELOB_RAT, NSDHL_RAT, RL32_RAT, SEPT2_RAT, ELP2_RAT, TBA4A_RAT, TPPP3_RAT, EFIAI_RAT, NSF_RAT, SCFDI_RAT, KPCCA_RAT, SH3GI_RAT, VDACC2_RAT, NDUV2_RAT, HSIO5_RAT, PSB2_RAT, NUCL_RAT, RCN2_RAT, NFL_RAT, M20M_RAT, QCR8_RAT, F213A_RAT, CATD_RAT, PITMI_RAT, CN37_RAT, DLDH_RAT, TPML_RAT, TIM13_RAT, KINH_RAT, RTCB_RAT, DECR_RAT, SODM_RAT, RL23A_RAT, MGSTI_RAT, CDC42_RAT, GSTKI_RAT, ECHB_RAT, RSB_RAT, NAKD2_RAT, LISI_RAT, CALX_RAT, SFXN5_RAT, NMTI_RAT, RPNL_RAT, CDS2_RAT, PSB8_RAT, PAK2_RAT, RBBP7_RAT, CSK2B_RAT, NDU5A_RAT, MGLL_RAT, MPCP_RAT, SYN2_RAT, COX2_RAT, GSTM4_RAT, RPF2_RAT, CSKP_RAT, GLYG_RAT, LGMN_RAT, MYO5A_RAT, FTO_RAT, KPYM_RAT, SYTI_RAT, CSRP1_RAT, DHB4_RAT, ROCK2_RAT, VAPA_RAT, U2AF4_RAT, NDU52_RAT, HCD2_RAT, IDH3B_RAT, LPPRC_RAT, RS3_RAT, TBCE_RAT, ULAI_RAT, GSTPI_RAT, ATPG_RAT, SDHA_RAT, ACSF2_RAT, DDAH2_RAT, PSA6_RAT, SCAMI_RAT, ATPB_RAT, GAK_RAT, RLAO_RAT, LTOR3_RAT, PPID_RAT, MYHIO_RAT, VATI_RAT, ROGDI_RAT, MARE3_RAT, EFTU_RAT, PACNI_RAT, NCOAT_RAT, PRS6A_RAT, DHE3_RAT, NDU5I_RAT, ACADL_RAT, ANMI_RAT, SAEI_RAT, RL9_RAT, RL8_RAT, PLCGI_RAT, MYH9_RAT, CX7A2_RAT, VGF_RAT, RL13_RAT, PHOCN_RAT, RAB3C_RAT, CLCA_RAT, MTPN_RAT, DADI_RAT, RL13_RAT, ECHI_RAT, TRAPI_RAT, LETMI_RAT, DHSO_RAT, PYC_RAT, BIN2_RAT                                                                                                                                                                                         |
| membrane-bounded organelle      | 141 of 220 genes, 64.1% | 17552 of 36892 genes, 47.6% | 0.00011  | 0.00% | 0.00 | COX41_RAT, KCRU_RAT, LANCI_RAT, BCATI_RAT, STIPI_RAT, VATEI_RAT, 7B2_RAT, IDHGI_RAT, ECHM_RAT, CLCB_RAT, PLPP_RAT, IVD_RAT, ATPA_RAT, NCSI_RAT, RS19_RAT, DDIX_RAT, RS26_RAT, DLG4_RAT, PTN23_RAT, MATR3_RAT, AT1B3_RAT, ELOB_RAT, NSDHL_RAT, SEPT2_RAT, ELP2_RAT, TBA4A_RAT, TPPP3_RAT, EFIAI_RAT, SCFDI_RAT, KPCCA_RAT, SH3GI_RAT, VDACC2_RAT, GDIRI_RAT, NDUV2_RAT, HSIO5_RAT, PSB2_RAT, CD166_RAT, NUCL_RAT, RCN2_RAT, CNPD2_RAT, CYTC_RAT, NCALD_RAT, M20M_RAT, PSMD2_RAT, QCRB_RAT, F213A_RAT, CATD_RAT, PITMI_RAT, CN37_RAT, DLDH_RAT, TIM13_RAT, KINH_RAT, RTCB_RAT, DECR_RAT, S4A4_RAT, SODM_RAT, MGSTI_RAT, CDC42_RAT, GSTKI_RAT, ECHB_RAT, RSB_RAT, NAKD2_RAT, LISI_RAT, CALX_RAT, SFXN5_RAT, RPNL_RAT, CDS2_RAT, PSB8_RAT, S15A2_RAT, PAK2_RAT, RBBP7_RAT, CSK2B_RAT, NDU5A_RAT, NUDT3_RAT, MPCP_RAT, SYN2_RAT, FIOAI_RAT, COX2_RAT, GSTM4_RAT, RPF2_RAT, CSKP_RAT, GLYG_RAT, LGMN_RAT, MYO5A_RAT, FTO_RAT, SNAAR_RAT, KPYM_RAT, SYTI_RAT, CSRP1_RAT, BPN1_RAT, DHB4_RAT, ROCK2_RAT, VAPA_RAT, U2AF4_RAT, NDU52_RAT, LG3BP_RAT, HCD2_RAT, IDH3B_RAT, LPPRC_RAT, RS3_RAT, ULAI_RAT, GSTPI_RAT, ATPG_RAT, SDHA_RAT, ACSF2_RAT, DDAH2_RAT, PSA6_RAT, SCAMI_RAT, ATPB_RAT, GAK_RAT, RLAO_RAT, LTOR3_RAT, PPID_RAT, MYHIO_RAT, VATI_RAT, ROGDI_RAT, MARE3_RAT, EFTU_RAT, PACNI_RAT, NCOAT_RAT, PRS6A_RAT, DHE3_RAT, NDU5I_RAT, ACADL_RAT, ANMI_RAT, SAEI_RAT, RL9_RAT, RL8_RAT, PLCGI_RAT, MYH9_RAT, CX7A2_RAT, VGF_RAT, PHOCN_RAT, RAB3C_RAT, CLCA_RAT, MTPN_RAT, DADI_RAT, ECHI_RAT, TRAPI_RAT, LETMI_RAT, DHSO_RAT, PYC_RAT                                                                                                                                                                             |
| proteasome complex              | 8 of 220 genes, 3.6%    | 142 of 36892 genes, 0.4%    | 0.00049  | 0.00% | 0.00 | PSMD2_RAT, PRS6A_RAT, ELP2_RAT, PSA6_RAT, PSB8_RAT, PRS7_RAT, PSB2_RAT, PSMEI_RAT                                                                                                                                                                                                                                                                                                                                                                                                                                                                                                                                                                                                                                                                                                                                                                                                                                                                                                                                                                                                                                                                                                                                                                                                                                                                                                                                                                                                                                                                                                                                                                                                                                 |
| extracellular vesicular exosome | 49 of 220 genes, 22.3%  | 4233 of 36892 genes, 11.5%  | 0.00077  | 0.09% | 0.02 | COX41_RAT, LTOR3_RAT, LANCI_RAT, CRYLI_RAT, CNPD2_RAT, CYTC_RAT, PSB8_RAT, S15A2_RAT, NCALD_RAT, VATI_RAT, PSMD2_RAT, EFTU_RAT, F213A_RAT, CSK2B_RAT, NUDT3_RAT, ATIBI_RAT, FIOAI_RAT, CN37_RAT, GSTM4_RAT, GLYG_RAT, PLPP_RAT, NCSI_RAT, SNAAR_RAT, S4A4_RAT, SODM_RAT, CSRP1_RAT, RS26_RAT, BPN1_RAT, AT1B3_RAT, MTPN_RAT, LG3BP_RAT, DADI_RAT, SEPT2_RAT, CDC42_RAT, GSTKI_RAT, TBA4A_RAT, ECHB_RAT, ECHI_RAT, TPPP3_RAT, TRAPI_RAT, RSB_RAT, GDIRI_RAT, DDAH2_RAT, HSIO5_RAT, LISI_RAT, CALX_RAT, PSA6_RAT, PSB2_RAT, CD166_RAT                                                                                                                                                                                                                                                                                                                                                                                                                                                                                                                                                                                                                                                                                                                                                                                                                                                                                                                                                                                                                                                                                                                                                                               |
| extracellular organelle         | 49 of 220 genes, 22.3%  | 4238 of 36892 genes, 11.5%  | 0.00079  | 0.09% | 0.02 | COX41_RAT, LTOR3_RAT, LANCI_RAT, CRYLI_RAT, CNPD2_RAT, CYTC_RAT, PSB8_RAT, S15A2_RAT, NCALD_RAT, VATI_RAT, PSMD2_RAT, EFTU_RAT, F213A_RAT, CSK2B_RAT, NUDT3_RAT, ATIBI_RAT, FIOAI_RAT, CN37_RAT, GSTM4_RAT, GLYG_RAT, PLPP_RAT, NCSI_RAT, SNAAR_RAT, S4A4_RAT, SODM_RAT, CSRP1_RAT, RS26_RAT, BPN1_RAT, AT1B3_RAT, MTPN_RAT, LG3BP_RAT, DADI_RAT, SEPT2_RAT, CDC42_RAT, GSTKI_RAT, TBA4A_RAT, ECHB_RAT, ECHI_RAT, TPPP3_RAT, TRAPI_RAT, RSB_RAT, GDIRI_RAT, DDAH2_RAT, HSIO5_RAT, LISI_RAT, CALX_RAT, PSA6_RAT, PSB2_RAT, CD166_RAT                                                                                                                                                                                                                                                                                                                                                                                                                                                                                                                                                                                                                                                                                                                                                                                                                                                                                                                                                                                                                                                                                                                                                                               |

|                                                    |                               |                                      |         |       |      |                                                                                                                                                                                                                                                                                                                                                                                                                                                                                                                                                                                                                                                                                                                                                                                                                                                                                                                                                                                                                                                                                                                                                                                                                                                                                                                            |
|----------------------------------------------------|-------------------------------|--------------------------------------|---------|-------|------|----------------------------------------------------------------------------------------------------------------------------------------------------------------------------------------------------------------------------------------------------------------------------------------------------------------------------------------------------------------------------------------------------------------------------------------------------------------------------------------------------------------------------------------------------------------------------------------------------------------------------------------------------------------------------------------------------------------------------------------------------------------------------------------------------------------------------------------------------------------------------------------------------------------------------------------------------------------------------------------------------------------------------------------------------------------------------------------------------------------------------------------------------------------------------------------------------------------------------------------------------------------------------------------------------------------------------|
| extracellular<br>membrane-<br>bounded<br>organelle | 49 of 220<br>genes,<br>22.3%  | 4238 of<br>36892<br>genes,<br>11.5%  | 0.00079 | 0.08% | 0.02 | COX41_RAT, LTOR3_RAT, LANCL_RAT, CRYLI_RAT, CNDP2_RAT, CYTC_RAT, PSB8_RAT, S15A2_RAT, NCA LD_RAT, VATI_RAT, PSM D2_RAT, EFTU_RAT, F213A_RAT, CSK2B_RAT, NUDT3_RAT, ATIBI_RAT, FIOAI_RAT, CN37_RAT, GSTM4_RAT, GLYG_RAT, PLPP_RAT, NCSI_RAT, SNAA_RAT, S4A4_RAT, SODM_RAT, CSRPI_RAT, RS26_RAT, BPNTI_RAT, AT1 B3_RAT, MTPN_RAT, LG3BP_RAT, DADI_RAT, SEPT2_RAT, CDC42_RAT, GSTKI_RAT, TBA4A_RAT, ECHB_RAT, ECHI_RAT, TPPP3_RAT, TRAPI_RAT, RS8_RAT, GDIRI_RAT, DDAH2_RAT, HSIOS_RAT, LISI_RAT, CALX_RAT, PSA6_RAT, PSB2_RAT, CD166_RAT                                                                                                                                                                                                                                                                                                                                                                                                                                                                                                                                                                                                                                                                                                                                                                                     |
| respiratory<br>chain                               | 8 of 220<br>genes, 3. 6%      | 155 of<br>36892<br>genes, 0. 4%      | 0.0009  | 0.08% | 0.02 | NDUSI_RAT, COX2_RAT, NDUS2_RAT, NDUV2_RAT, SDHA_RAT, QCR8_RAT, NDU S4_RAT, CX7A2_RAT                                                                                                                                                                                                                                                                                                                                                                                                                                                                                                                                                                                                                                                                                                                                                                                                                                                                                                                                                                                                                                                                                                                                                                                                                                       |
| intracellular<br>membrane-<br>bounded<br>organelle | 122 of 220<br>genes,<br>55.5% | 15481 of<br>36892<br>genes,<br>42.0% | 0.00752 | 0.08% | 0.02 | COX41_RAT, KCRU_RAT, LANCL_RAT, RPNL_RAT, CDS2_RAT, PSB8_RAT, PAK2_RAT, BCATL_RAT, RBBP7_RAT, STIPI_RAT, NDUS4_RAT, CSK2B_RAT, VATEI_RAT, SYN2_RAT, MPCP_RAT, 7B2_RAT, IDH G1_RAT, ECHM_RAT, COX2_RAT, RPPGF2_RAT, GSTM4_RAT, CSKP_RAT, CLCB_RAT, LGMN_RAT, MYO5A_RAT, FTO_RAT, IVD_RAT, ATPA_RAT, NCSI_RAT, KPVM_RAT, SYTL_RAT, RS19_RAT, DDXI_RAT, RS26_RAT, CSRPI_RAT, DLG4_RAT, PTN23_RAT, ROCK2_RAT, DHB4_RAT, MATR3_RAT, AT1 B3_RAT, ELOB_RAT, VAPA_RAT, U2AF4_RAT, NDUS2_RAT, NSDHL_RAT, SEPT2_RAT, EL P2_RAT, HCD2_RAT, IDH3B_RAT, LPPRC_RAT, EFIAI_RAT, SCFDI_RAT, KPCA_RAT, RS3_RAT, SH3GI_RAT, VDACC2_RAT, ULAI_RAT, ATPG_RAT, GSTPI_RAT, NDUV2_RAT, SDHA_RAT, DDAH2_RAT, HSI05_RAT, ACSF2_RAT, PSA6_RAT, SCAMI_RAT, GAK_RAT, PSB2_RAT, ATP8_RAT, NU CL_RAT, RLAO_RAT, RCN 2_RAT, LTOR3_RAT, PPIID_RAT, VATI_RAT, ROGDI_RAT, M20M_RAT, EFTU_RAT, PACNI_RAT, NCOAT_RAT, QCR8_RAT, F213A_RAT, PRS6A_RAT, DHE3_RAT, CATD_RAT, NDUSI_RAT, PITMI_RAT, ACADL_RAT, SAEI_RAT, ANMI_RAT, CN37_RAT, DLDH_RAT, TIM13_RAT, KINH_RAT, RT CB_RAT, MYH9_RAT, PLCGI_RAT, VGF_RAT, CX7A2_RAT, DECR_RAT, SODM_RAT, PHOCN_RAT, RAB3C_RAT, CLCA_RAT, RL23A_RAT, MTPN_RAT, DADI_RAT, MGSTI_RAT, CDC42_RAT, GSTKI_RAT, ECHB_RAT, ECHI_RAT, LETMI_RAT, TRAPI_RAT, DHSO_RAT, RS8_RAT, NAKD2_RAT, LISI_RAT, CALX_RAT, PYC_RAT, SFXNS_RAT |
